# Supplementary material
Source: publisher figshare collection journal article supplement (https://gsajournals.figshare.com/ndownloader/files/12778433)
Supplement: Supplementary file 1 [file 12778433]

## Sheet: Sheet1
WormBase ID	Common Name	Locus ID	Ahringer RNAi Clone Location	Ensembl ID	HGNC Symbol	No. of Programs	Databases	SMART IDs	InterPro Domains	OMIM Phenotypes
WBGene00000022	abt-4	Y39D8C.1	V-1G15|V-1G17	ENSG00000167972	ABCA3	6	Ensembl Compara 87-89|Homologene|InParanoid|OMA|OrthoInspector|OrthoMCL	SM00382	IPR003439 "ABC transporter-like"|IPR003593 "AAA+ ATPase domain"|IPR026082 "ABC transporter A, ABCA"|IPR027417 "P-loop containing nucleoside triphosphate hydrolase"	Surfactant metabolism dysfunction, pulmonary, 3, 610921
WBGene00000040	aco-1	ZK455.1	X-8A01	ENSG00000122729	ACO1	6	Ensembl Compara 87-89|Homologene|InParanoid|OMA|OrthoInspector|OrthoMCL		IPR000573 "Aconitase A/isopropylmalate dehydratase small subunit, swivel domain"|IPR001030 "Aconitase/3-isopropylmalate dehydratase large subunit, alpha/beta/alpha domain"|IPR006249 "Aconitase/Iron-responsive element-binding protein 2"|IPR015928 "Aconitase/3-isopropylmalate dehydratase, swivel"|IPR015931 "Aconitase/3-isopropylmalate dehydratase large subunit, alpha/beta/alpha, subdomain 1/3"|IPR0…
WBGene00000041	aco-2	F54H12.1	III-4O01	ENSG00000100412	ACO2	6	Ensembl Compara 87-89|Homologene|InParanoid|OMA|OrthoInspector|OrthoMCL		IPR000573 "Aconitase A/isopropylmalate dehydratase small subunit, swivel domain"|IPR001030 "Aconitase/3-isopropylmalate dehydratase large subunit, alpha/beta/alpha domain"|IPR006248 "Aconitase, mitochondrial-like"|IPR015928 "Aconitase/3-isopropylmalate dehydratase, swivel"|IPR015931 "Aconitase/3-isopropylmalate dehydratase large subunit, alpha/beta/alpha, subdomain 1/3"|IPR015932 "Aconitase/3-iso…	Infantile cerebellar-retinal degeneration, 614559|Optic atrophy 9, 616289
WBGene00000064	act-2	T04C12.5	V-7H07	ENSG00000184009	ACTG1	6	Ensembl Compara 87-89|Homologene|InParanoid|OMA|OrthoInspector|OrthoMCL	SM00268	IPR004000 "Actin family"	Baraitser-Winter syndrome 2, 614583|Deafness, autosomal dominant 20/26, 604717
WBGene00000066	act-4	M03F4.2	X-2J16	ENSG00000184009	ACTG1	6	Ensembl Compara 87-89|Homologene|InParanoid|OMA|OrthoInspector|OrthoMCL	SM00268	IPR004000 "Actin family"	Baraitser-Winter syndrome 2, 614583|Deafness, autosomal dominant 20/26, 604717
WBGene00000068	acy-1	F17C8.1	III-2K14	ENSG00000162104	ADCY9	6	Ensembl Compara 87-89|Homologene|InParanoid|OMA|OrthoInspector|OrthoMCL	SM00044	IPR001054 "Adenylyl cyclase class-3/4/guanylyl cyclase"|IPR029787 "Nucleotide cyclase"
WBGene00000072	add-1	F39C12.2	X-2H14	ENSG00000087274	ADD1	6	Ensembl Compara 87-89|Homologene|InParanoid|OMA|OrthoInspector|OrthoMCL	SM01007	IPR001303 "Class II aldolase/adducin N-terminal"	Hypertension, essential, salt-sensitive, 145500
WBGene00000081	ads-1	Y50D7A.7	III-8A02	ENSG00000018510	AGPS	6	Ensembl Compara 87-89|Homologene|InParanoid|OMA|OrthoInspector|OrthoMCL		IPR004113 "FAD-linked oxidase, C-terminal"|IPR006094 "FAD linked oxidase, N-terminal"|IPR016164 "FAD-linked oxidase-like, C-terminal"|IPR016166 "FAD-binding, type 2"|IPR016167 "FAD-binding, type 2, subdomain 1"|IPR016169 "CO dehydrogenase flavoprotein-like, FAD-binding, subdomain 2"|IPR025650 "Alkyldihydroxyacetonephosphate synthase"	Rhizomelic chondrodysplasia punctata, type 3, 600121
WBGene00000086	aex-3	C02H7.3	X-1K05|X-8A03	ENSG00000110514	MADD	6	Ensembl Compara 87-89|Homologene|InParanoid|OMA|OrthoInspector|OrthoMCL	SM00799|SM00800|SM00801	IPR001194 "DENN domain"|IPR005112 "dDENN domain"|IPR005113 "uDENN domain"
WBGene00000089	aex-6	Y87G2A.4	I-6J18	ENSG00000069974	RAB27A	6	Ensembl Compara 87-89|Homologene|InParanoid|OMA|OrthoInspector|OrthoMCL	SM00173|SM00174|SM00175|SM00176	IPR001806 "Small GTPase superfamily"|IPR005225 "Small GTP-binding protein domain"|IPR027417 "P-loop containing nucleoside triphosphate hydrolase"	Griscelli syndrome, type 2, 607624
WBGene00000092	ags-3	F32A6.4	X-3C05	ENSG00000121957	GPSM2	6	Ensembl Compara 87-89|Homologene|InParanoid|OMA|OrthoInspector|OrthoMCL	SM00028|SM00390	IPR003109 "GoLoco motif"|IPR011990 "Tetratricopeptide-like helical domain"|IPR019734 "Tetratricopeptide repeat"	Chudley-McCullough syndrome, 604213
WBGene00000099	air-2	B0207.4	I-9A05	ENSG00000087586	AURKA	6	Ensembl Compara 87-89|Homologene|InParanoid|OMA|OrthoInspector|OrthoMCL	SM00220	IPR000719 "Protein kinase domain"|IPR011009 "Protein kinase-like domain"|IPR030616 "Aurora kinase"	Colon cancer, susceptibility to, 114500
WBGene00000105	alg-1	F48F7.1	X-6D15	ENSG00000123908	AGO2	6	Ensembl Compara 87-89|Homologene|InParanoid|OMA|OrthoInspector|OrthoMCL	SM00949|SM00950|SM01163	IPR003100 "PAZ domain"|IPR003165 "Piwi domain"|IPR012337 "Ribonuclease H-like domain"|IPR014811 "Argonaute, linker 1 domain"|IPR032472 "Argonaute linker 2 domain"|IPR032473 "Protein argonaute, Mid domain"|IPR032474 "Protein argonaute, N-terminal"
WBGene00000107	alh-1	F54D8.3	III-2N01	ENSG00000111275	ALDH2	6	Ensembl Compara 87-89|Homologene|InParanoid|OMA|OrthoInspector|OrthoMCL		IPR015590 "Aldehyde dehydrogenase domain"|IPR016161 "Aldehyde/histidinol dehydrogenase"|IPR016162 "Aldehyde dehydrogenase N-terminal domain"|IPR016163 "Aldehyde dehydrogenase, C-terminal"	Alcohol sensitivity, acute, 610251|Esophageal cancer, alcohol-related, susceptibility to|Hangover, susceptibility to, 610251|Sublingual nitroglycerin, susceptibility to poor response to
WBGene00000109	alh-3	F36H1.6	IV-5J04	ENSG00000144908	ALDH1L1	6	Ensembl Compara 87-89|Homologene|InParanoid|OMA|OrthoInspector|OrthoMCL		IPR002376 "Formyl transferase, N-terminal"|IPR005793 "Formyl transferase, C-terminal"|IPR009081 "Phosphopantetheine binding ACP domain"|IPR011034 "Formyl transferase, C-terminal-like"|IPR011407 "10-formyltetrahydrofolate dehydrogenase"|IPR015590 "Aldehyde dehydrogenase domain"|IPR016161 "Aldehyde/histidinol dehydrogenase"|IPR016162 "Aldehyde dehydrogenase N-terminal domain"|IPR016163 "Aldehyde de…
WBGene00000110	alh-4	T05H4.13		ENSG00000072210	ALDH3A2	6	Ensembl Compara 87-89|Homologene|InParanoid|OMA|OrthoInspector|OrthoMCL		IPR012394 "Aldehyde dehydrogenase NAD(P)-dependent"|IPR015590 "Aldehyde dehydrogenase domain"|IPR016161 "Aldehyde/histidinol dehydrogenase"|IPR016162 "Aldehyde dehydrogenase N-terminal domain"|IPR016163 "Aldehyde dehydrogenase, C-terminal"	Sjogren-Larsson syndrome, 270200
WBGene00000111	alh-5	T08B1.3	V-1P10	ENSG00000072210	ALDH3A2	6	Ensembl Compara 87-89|Homologene|InParanoid|OMA|OrthoInspector|OrthoMCL		IPR012394 "Aldehyde dehydrogenase NAD(P)-dependent"|IPR015590 "Aldehyde dehydrogenase domain"|IPR016161 "Aldehyde/histidinol dehydrogenase"|IPR016162 "Aldehyde dehydrogenase N-terminal domain"|IPR016163 "Aldehyde dehydrogenase, C-terminal"	Sjogren-Larsson syndrome, 270200
WBGene00000112	alh-6	F56D12.1	II-1F24|II-1H02	ENSG00000159423	ALDH4A1	6	Ensembl Compara 87-89|Homologene|InParanoid|OMA|OrthoInspector|OrthoMCL		IPR005931 "Delta-1-pyrroline-5-carboxylate dehydrogenase"|IPR015590 "Aldehyde dehydrogenase domain"|IPR016161 "Aldehyde/histidinol dehydrogenase"|IPR016162 "Aldehyde dehydrogenase N-terminal domain"|IPR016163 "Aldehyde dehydrogenase, C-terminal"	Hyperprolinemia, type II, 239510
WBGene00000113	alh-7	F45H10.1	II-8B16	ENSG00000112294	ALDH5A1	6	Ensembl Compara 87-89|Homologene|InParanoid|OMA|OrthoInspector|OrthoMCL		IPR015590 "Aldehyde dehydrogenase domain"|IPR016161 "Aldehyde/histidinol dehydrogenase"|IPR016162 "Aldehyde dehydrogenase N-terminal domain"|IPR016163 "Aldehyde dehydrogenase, C-terminal"	Succinic semialdehyde dehydrogenase deficiency, 271980
WBGene00000114	alh-8	F13D12.4	II-7P24	ENSG00000119711	ALDH6A1	6	Ensembl Compara 87-89|Homologene|InParanoid|OMA|OrthoInspector|OrthoMCL		IPR010061 "Methylmalonate-semialdehyde dehydrogenase"|IPR015590 "Aldehyde dehydrogenase domain"|IPR016161 "Aldehyde/histidinol dehydrogenase"|IPR016162 "Aldehyde dehydrogenase N-terminal domain"|IPR016163 "Aldehyde dehydrogenase, C-terminal"	Methylmalonate semialdehyde dehydrogenase deficiency, 614105
WBGene00000115	alh-9	F01F1.6	III-3G09	ENSG00000164904	ALDH7A1	6	Ensembl Compara 87-89|Homologene|InParanoid|OMA|OrthoInspector|OrthoMCL		IPR015590 "Aldehyde dehydrogenase domain"|IPR016161 "Aldehyde/histidinol dehydrogenase"|IPR016162 "Aldehyde dehydrogenase N-terminal domain"|IPR016163 "Aldehyde dehydrogenase, C-terminal"	Epilepsy, pyridoxine-dependent, 266100
WBGene00000116	alh-10	C54D1.4	X-3B18	ENSG00000118514	ALDH8A1	6	Ensembl Compara 87-89|Homologene|InParanoid|OMA|OrthoInspector|OrthoMCL		IPR015590 "Aldehyde dehydrogenase domain"|IPR016161 "Aldehyde/histidinol dehydrogenase"|IPR016162 "Aldehyde dehydrogenase N-terminal domain"|IPR016163 "Aldehyde dehydrogenase, C-terminal"
WBGene00000117	alh-11	F42G9.5	III-1A16	ENSG00000143149	ALDH9A1	6	Ensembl Compara 87-89|Homologene|InParanoid|OMA|OrthoInspector|OrthoMCL		IPR015590 "Aldehyde dehydrogenase domain"|IPR016161 "Aldehyde/histidinol dehydrogenase"|IPR016162 "Aldehyde dehydrogenase N-terminal domain"|IPR016163 "Aldehyde dehydrogenase, C-terminal"|IPR024453 "Permuted papain-like amidase enzyme, YaeF/YiiX, C92 family"
WBGene00000142	aos-1	C08B6.9		ENSG00000142230	SAE1	6	Ensembl Compara 87-89|Homologene|InParanoid|OMA|OrthoInspector|OrthoMCL		IPR000594 "THIF-type NAD/FAD binding fold"|IPR016040 "NAD(P)-binding domain"
WBGene00044345		Y48G1C.12	I-9P07	ENSG00000164162	ANAPC10	6	Ensembl Compara 87-89|Homologene|InParanoid|OMA|OrthoInspector|OrthoMCL	SM01337	IPR004939 "APC10/DOC domain"|IPR008979 "Galactose-binding domain-like"
WBGene00000147	aph-1	VF36H2L.1	I-4H01	ENSG00000117362	APH1A	6	Ensembl Compara 87-89|Homologene|InParanoid|OMA|OrthoInspector|OrthoMCL		IPR009294 "Gamma-secretase subunit Aph-1"
WBGene00000148	aph-2	ZC434.6	I-5M17	ENSG00000162736	NCSTN	6	Ensembl Compara 87-89|Homologene|InParanoid|OMA|OrthoInspector|OrthoMCL		IPR008710 "Nicastrin"	Acne inversa, familial, 1, 142690
WBGene00006829	unc-101	K11D2.3	I-6G20	ENSG00000072958	AP1M1	6	Ensembl Compara 87-89|Homologene|InParanoid|OMA|OrthoInspector|OrthoMCL		IPR001392 "Clathrin adaptor, mu subunit"|IPR011012 "Longin-like domain"|IPR022775 "AP complex, mu/sigma subunit"|IPR028565 "Mu homology domain"
WBGene00000155	app-1	W03G9.4	I-2O15	ENSG00000108039	XPNPEP1	6	Ensembl Compara 87-89|Homologene|InParanoid|OMA|OrthoInspector|OrthoMCL		IPR000587 "Creatinase, N-terminal"|IPR000994 "Peptidase M24, structural domain"|IPR028980 "Creatinase/Aminopeptidase P, N-terminal"|IPR029149 "Creatinase/Aminopeptidase P/Spt16, N-terminal"|IPR032416 "Peptidase M24, C-terminal domain"
WBGene00000157	aps-2	F02E8.3	X-2N17	ENSG00000042753	AP2S1	6	Ensembl Compara 87-89|Homologene|InParanoid|OMA|OrthoInspector|OrthoMCL		IPR011012 "Longin-like domain"|IPR016635 "Adaptor protein complex, sigma subunit"|IPR022775 "AP complex, mu/sigma subunit"	Hypocalciuric hypercalcemia, type III, 600740
WBGene00000158	apg-1	Y105E8A.9	I-7A02	ENSG00000166747	AP1G1	6	Ensembl Compara 87-89|Homologene|InParanoid|OMA|OrthoInspector|OrthoMCL	SM00809	IPR002553 "Clathrin/coatomer adaptor, adaptin-like, N-terminal"|IPR008152 "Clathrin adaptor, alpha/beta/gamma-adaptin, appendage, Ig-like subdomain"|IPR008153 "Clathrin adaptor, gamma-adaptin, appendage"|IPR011989 "Armadillo-like helical"|IPR013041 "Coatomer/clathrin adaptor appendage, Ig-like subdomain"|IPR016024 "Armadillo-type fold"|IPR017107 "Adaptor protein complex AP-1, gamma subunit"
WBGene00000159	aps-1	F29G9.3	V-4F01	ENSG00000182287	AP1S2	6	Ensembl Compara 87-89|Homologene|InParanoid|OMA|OrthoInspector|OrthoMCL		IPR011012 "Longin-like domain"|IPR016635 "Adaptor protein complex, sigma subunit"|IPR022775 "AP complex, mu/sigma subunit"	Mental retardation, X-linked syndromic 5, 304340
WBGene00000160	apb-1	Y71H2B.10	III-7K20	ENSG00000100280	AP1B1	6	Ensembl Compara 87-89|Homologene|InParanoid|OMA|OrthoInspector|OrthoMCL	SM00185|SM00809|SM01020	IPR002553 "Clathrin/coatomer adaptor, adaptin-like, N-terminal"|IPR008152 "Clathrin adaptor, alpha/beta/gamma-adaptin, appendage, Ig-like subdomain"|IPR009028 "Coatomer/calthrin adaptor appendage, C-terminal subdomain"|IPR011989 "Armadillo-like helical"|IPR012295 "Beta2-adaptin/TBP, C-terminal domain"|IPR013037 "Clathrin adaptor, beta-adaptin, appendage, Ig-like subdomain"|IPR013041 "Coatomer/cla…
WBGene00000164	apm-3	F53H8.1	X-1O11	ENSG00000185009	AP3M1	6	Ensembl Compara 87-89|Homologene|InParanoid|OMA|OrthoInspector|OrthoMCL		IPR001392 "Clathrin adaptor, mu subunit"|IPR011012 "Longin-like domain"|IPR022775 "AP complex, mu/sigma subunit"|IPR028565 "Mu homology domain"
WBGene00000165	aps-3	Y48G8AL.14	I-7H16|I-9G06	ENSG00000157823	AP3S2	6	Ensembl Compara 87-89|Homologene|InParanoid|OMA|OrthoInspector|OrthoMCL		IPR011012 "Longin-like domain"|IPR016635 "Adaptor protein complex, sigma subunit"|IPR022775 "AP complex, mu/sigma subunit"
WBGene00000170	aqp-2	C01G6.1	II-10A02	ENSG00000143595	AQP10	6	Ensembl Compara 87-89|Homologene|InParanoid|OMA|OrthoInspector|OrthoMCL		IPR000425 "Major intrinsic protein"|IPR023271 "Aquaporin-like"
WBGene00000175	aqp-7	M02F4.8	X-2E13	ENSG00000143595	AQP10	6	Ensembl Compara 87-89|Homologene|InParanoid|OMA|OrthoInspector|OrthoMCL		IPR000425 "Major intrinsic protein"|IPR023271 "Aquaporin-like"
WBGene00000180	arc-1	ZK1320.6	II-10A03	ENSG00000113595	TRIM23	6	Ensembl Compara 87-89|Homologene|InParanoid|OMA|OrthoInspector|OrthoMCL	SM00175|SM00177|SM00178|SM00184|SM00336|SM00502	IPR000315 "B-box-type zinc finger"|IPR001841 "Zinc finger, RING-type"|IPR003649 "B-box, C-terminal"|IPR005225 "Small GTP-binding protein domain"|IPR006689 "Small GTPase superfamily, ARF/SAR type"|IPR013083 "Zinc finger, RING/FYVE/PHD-type"|IPR027370 "RING-type zinc-finger, LisH dimerisation motif"|IPR027417 "P-loop containing nucleoside triphosphate hydrolase"
WBGene00000181	ard-1	F01G4.2	IV-5N08	ENSG00000072506	HSD17B10	6	Ensembl Compara 87-89|Homologene|InParanoid|OMA|OrthoInspector|OrthoMCL		IPR002347 "Short-chain dehydrogenase/reductase SDR"|IPR016040 "NAD(P)-binding domain"	HSD10 mitochondrial disease, 300438
WBGene00000182	arf-1.2	B0336.2	III-3A13	ENSG00000143761	ARF1	6	Ensembl Compara 87-89|Homologene|InParanoid|OMA|OrthoInspector|OrthoMCL	SM00175|SM00177|SM00178	IPR005225 "Small GTP-binding protein domain"|IPR006689 "Small GTPase superfamily, ARF/SAR type"|IPR027417 "P-loop containing nucleoside triphosphate hydrolase"
WBGene00000184	arf-6	Y116A8C.12	IV-8G01	ENSG00000165527	ARF6	6	Ensembl Compara 87-89|Homologene|InParanoid|OMA|OrthoInspector|OrthoMCL	SM00175|SM00177|SM00178	IPR005225 "Small GTP-binding protein domain"|IPR006689 "Small GTPase superfamily, ARF/SAR type"|IPR027417 "P-loop containing nucleoside triphosphate hydrolase"
WBGene00000187	arl-1	F54C9.10	II-6A24	ENSG00000120805	ARL1	6	Ensembl Compara 87-89|Homologene|InParanoid|OMA|OrthoInspector|OrthoMCL	SM00175|SM00177|SM00178	IPR005225 "Small GTP-binding protein domain"|IPR006689 "Small GTPase superfamily, ARF/SAR type"|IPR027417 "P-loop containing nucleoside triphosphate hydrolase"
WBGene00000188	arl-3	F19H8.3	II-9A04	ENSG00000138175	ARL3	6	Ensembl Compara 87-89|Homologene|InParanoid|OMA|OrthoInspector|OrthoMCL	SM00177|SM00178	IPR005225 "Small GTP-binding protein domain"|IPR006689 "Small GTPase superfamily, ARF/SAR type"|IPR027417 "P-loop containing nucleoside triphosphate hydrolase"
WBGene00000192	arl-8	Y57G11C.13	IV-9G14	ENSG00000143862	ARL8A	6	Ensembl Compara 87-89|Homologene|InParanoid|OMA|OrthoInspector|OrthoMCL	SM00175|SM00177|SM00178	IPR005225 "Small GTP-binding protein domain"|IPR006689 "Small GTPase superfamily, ARF/SAR type"|IPR027417 "P-loop containing nucleoside triphosphate hydrolase"
WBGene00000193	arl-6	C38D4.8	III-2O08	ENSG00000113966	ARL6	6	Ensembl Compara 87-89|Homologene|InParanoid|OMA|OrthoInspector|OrthoMCL	SM00177|SM00178	IPR005225 "Small GTP-binding protein domain"|IPR006689 "Small GTPase superfamily, ARF/SAR type"|IPR027417 "P-loop containing nucleoside triphosphate hydrolase"	Bardet-Biedl syndrome 1, modifier of, 209900|Bardet-Biedl syndrome 3, 600151|Retinitis pigmentosa 55, 613575
WBGene00000195	arr-1	F53H8.2	X-1O13	ENSG00000137486	ARRB1	6	Ensembl Compara 87-89|Homologene|InParanoid|OMA|OrthoInspector|OrthoMCL	SM01017	IPR000698 "Arrestin"|IPR011021 "Arrestin-like, N-terminal"|IPR011022 "Arrestin C-terminal-like domain"|IPR014752 "Arrestin, C-terminal"|IPR014753 "Arrestin, N-terminal"|IPR014756 "Immunoglobulin E-set"
WBGene00000197	aars-2	F28H1.3	I-1B08	ENSG00000090861	AARS	6	Ensembl Compara 87-89|Homologene|InParanoid|OMA|OrthoInspector|OrthoMCL	SM00863	IPR002318 "Alanine-tRNA ligase, class IIc"|IPR003156 "DHHA1 domain"|IPR009000 "Translation protein, beta-barrel domain"|IPR012947 "Threonyl/alanyl tRNA synthetase, SAD"|IPR018162 "Alanine-tRNA ligase, class IIc, anti-codon-binding domain"|IPR018163 "Threonyl/alanyl tRNA synthetase, class II-like, putative editing domain"|IPR018164 "Alanyl-tRNA synthetase, class IIc, N-terminal"	Charcot-Marie-Tooth disease, axonal, type 2N, 613287|Epileptic encephalopathy, early infantile, 29, 616339
WBGene00000198	art-1	C15F1.6	II-5G06	ENSG00000099797	TECR	6	Ensembl Compara 87-89|Homologene|InParanoid|OMA|OrthoInspector|OrthoMCL		IPR000626 "Ubiquitin domain"|IPR001104 "3-oxo-5-alpha-steroid 4-dehydrogenase, C-terminal"|IPR029071 "Ubiquitin-related domain"	Mental retardation, autosomal recessive 14, 614020
WBGene00000199	arx-1	Y71F9AL.16	I-9A06|I-9L02	ENSG00000115091	ACTR3	6	Ensembl Compara 87-89|Homologene|InParanoid|OMA|OrthoInspector|OrthoMCL	SM00268	IPR004000 "Actin family"|IPR015623 "Actin-related protein 3, metazoa"
WBGene00000200	arx-2	K07C5.1	V-7M13	ENSG00000138071	ACTR2	6	Ensembl Compara 87-89|Homologene|InParanoid|OMA|OrthoInspector|OrthoMCL	SM00268	IPR004000 "Actin family"|IPR027306 "Actin-related protein 2"
WBGene00000201	arx-3	Y79H2A.6	III-6M19	ENSG00000241685	ARPC1A	6	Ensembl Compara 87-89|Homologene|InParanoid|OMA|OrthoInspector|OrthoMCL	SM00320	IPR001680 "WD40 repeat"|IPR015943 "WD40/YVTN repeat-like-containing domain"|IPR017383 "Actin-related protein 2/3 complex subunit 1"|IPR017986 "WD40-repeat-containing domain"
WBGene00000203	arx-5	Y37D8A.1	III-6M08	ENSG00000111229	ARPC3	6	Ensembl Compara 87-89|Homologene|InParanoid|OMA|OrthoInspector|OrthoMCL		IPR007204 "Actin-related protein 2/3 complex subunit 3"
WBGene00000204	arx-6	C35D10.16	III-2B15	ENSG00000241553	ARPC4	6	Ensembl Compara 87-89|Homologene|InParanoid|OMA|OrthoInspector|OrthoMCL		IPR008384 "Actin-related protein 2/3 complex subunit 4"
WBGene00000205	arx-7	M01B12.3	I-1M08	ENSG00000162704	ARPC5	6	Ensembl Compara 87-89|Homologene|InParanoid|OMA|OrthoInspector|OrthoMCL		IPR006789 "Actin-related protein 2/3 complex subunit 5"
WBGene00016729		C46H11.3	I-2A18	ENSG00000162704	ARPC5	6	Ensembl Compara 87-89|Homologene|InParanoid|OMA|OrthoInspector|OrthoMCL		IPR006789 "Actin-related protein 2/3 complex subunit 5"
WBGene00000217	asp-4	R12H7.2	X-6O01	ENSG00000117984	CTSD	6	Ensembl Compara 87-89|Homologene|InParanoid|OMA|OrthoInspector|OrthoMCL		IPR001461 "Aspartic peptidase A1 family"|IPR021109 "Aspartic peptidase domain"|IPR033121 "Peptidase family A1 domain"|IPR033144 "Cathepsin D"	Ceroid lipofuscinosis, neuronal, 10, 610127
WBGene00000229	atp-2	C34E10.6	III-2B16	ENSG00000110955	ATP5B	6	Ensembl Compara 87-89|Homologene|InParanoid|OMA|OrthoInspector|OrthoMCL	SM00382	IPR000194 "ATPase, F1/V1/A1 complex, alpha/beta subunit, nucleotide-binding domain"|IPR000793 "ATPase, F1/V1/A1 complex, alpha/beta subunit, C-terminal"|IPR003593 "AAA+ ATPase domain"|IPR004100 "ATPase, F1 complex alpha/beta subunit, N-terminal domain"|IPR005722 "ATPase, F1 complex, beta subunit"|IPR024034 "ATPase, F1 complex beta subunit/V1 complex, C-terminal"|IPR027417 "P-loop containing nucle…
WBGene00000230	atp-3	F27C1.7	I-2O16	ENSG00000241837	ATP5O	6	Ensembl Compara 87-89|Homologene|InParanoid|OMA|OrthoInspector|OrthoMCL		IPR000711 "ATPase, OSCP/delta subunit"|IPR026015 "F1F0 ATP synthase OSCP/delta subunit, N-terminal domain"
WBGene00001979	hmp-2	K05C4.6	I-7E20	ENSG00000168036	CTNNB1	6	Ensembl Compara 87-89|Homologene|InParanoid|OMA|OrthoInspector|OrthoMCL	SM00185	IPR000225 "Armadillo"|IPR011989 "Armadillo-like helical"|IPR013284 "Beta-catenin"|IPR016024 "Armadillo-type fold"|IPR030461 "Junction plakoglobin/protein humpback-2"	Colorectal cancer, somatic, 114500|Exudative vitreoretinopathy 7, 617572|Hepatocellular carcinoma, somatic, 114550|Medulloblastoma, somatic, 155255|Mental retardation, autosomal dominant 19, 615075|Ovarian cancer, somatic, 167000|Pilomatricoma, somatic, 132600
WBGene00000240	pah-1	K08F8.4		ENSG00000171759	PAH	6	Ensembl Compara 87-89|Homologene|InParanoid|OMA|OrthoInspector|OrthoMCL		IPR001273 "Aromatic amino acid hydroxylase"|IPR002912 "ACT domain"|IPR005961 "Phenylalanine-4-hydroxylase, tetrameric form"|IPR019773 "Tyrosine 3-monooxygenase-like"|IPR019774 "Aromatic amino acid hydroxylase, C-terminal"	Hyperphenylalaninemia, non-PKU mild, 261600|Phenylketonuria, 261600
WBGene00000242	bbs-2	F20D12.3	IV-4E05	ENSG00000125124	BBS2	6	Ensembl Compara 87-89|Homologene|InParanoid|OMA|OrthoInspector|OrthoMCL		IPR015943 "WD40/YVTN repeat-like-containing domain"|IPR016616 "Bardet-Biedl syndrome 2 protein"|IPR017986 "WD40-repeat-containing domain"|IPR029333 "Ciliary BBSome complex subunit 2, C-terminal domain"|IPR029429 "Ciliary BBSome complex subunit 2, middle region"|IPR029430 "Ciliary BBSome complex subunit 2, N-terminal"	Bardet-Biedl syndrome 2, 615981|Retinitis pigmentosa 74, 616562
WBGene00000244	bbs-8	T25F10.5	V-4N14	ENSG00000165533	TTC8	6	Ensembl Compara 87-89|Homologene|InParanoid|OMA|OrthoInspector|OrthoMCL	SM00028	IPR011990 "Tetratricopeptide-like helical domain"|IPR019734 "Tetratricopeptide repeat"	Bardet-Biedl syndrome 8, 615985|Retinitis pigmentosa 51, 613464
WBGene00000247	bec-1	T19E7.3	IV-2N20|IV-2N22	ENSG00000126581	BECN1	6	Ensembl Compara 87-89|Homologene|InParanoid|OMA|OrthoInspector|OrthoMCL		IPR007243 "Atg6/Beclin"
WBGene00000253	bli-3	F56C11.1	I-1A05|I-1A17	ENSG00000140279	DUOX2	6	Ensembl Compara 87-89|Homologene|InParanoid|OMA|OrthoInspector|OrthoMCL	SM00054	IPR010255 "Haem peroxidase"|IPR011992 "EF-hand domain pair"|IPR013112 "FAD-binding 8"|IPR013121 "Ferric reductase, NAD binding domain"|IPR013130 "Ferric reductase transmembrane component-like domain"|IPR017938 "Riboflavin synthase-like beta-barrel"|IPR019791 "Haem peroxidase, animal"	Thyroid dyshormonogenesis 6, 607200
WBGene00018771	duox-2	F53G12.3	I-1A19	ENSG00000140279	DUOX2	6	Ensembl Compara 87-89|Homologene|InParanoid|OMA|OrthoInspector|OrthoMCL	SM00054	IPR010255 "Haem peroxidase"|IPR011992 "EF-hand domain pair"|IPR013112 "FAD-binding 8"|IPR013121 "Ferric reductase, NAD binding domain"|IPR013130 "Ferric reductase transmembrane component-like domain"|IPR017938 "Riboflavin synthase-like beta-barrel"|IPR019791 "Haem peroxidase, animal"	Thyroid dyshormonogenesis 6, 607200
WBGene00000266	bre-1	C53B4.7	IV-4H17	ENSG00000112699	GMDS	6	Ensembl Compara 87-89|Homologene|InParanoid|OMA|OrthoInspector|OrthoMCL		IPR006368 "GDP-mannose 4,6-dehydratase"|IPR016040 "NAD(P)-binding domain"
WBGene00010166	gmd-2	F56H6.5	I-6K23	ENSG00000112699	GMDS	6	Ensembl Compara 87-89|Homologene|InParanoid|OMA|OrthoInspector|OrthoMCL		IPR006368 "GDP-mannose 4,6-dehydratase"|IPR016040 "NAD(P)-binding domain"
WBGene00000271	brf-1	F45E12.2	II-5F13	ENSG00000185024	BRF1	6	Ensembl Compara 87-89|Homologene|InParanoid|OMA|OrthoInspector|OrthoMCL	SM00385	IPR000812 "Transcription factor TFIIB"|IPR011665 "Brf1, TBP-binding domain"|IPR013137 "Zinc finger, TFIIB-type"|IPR013150 "Transcription factor TFIIB, cyclin-like domain"|IPR013763 "Cyclin-like"|IPR029529 "Transcription factor IIIB subunit Brf1"	Cerebellofaciodental syndrome, 616202
WBGene00000276	byn-1	F57B9.5	III-3L19	ENSG00000112578	BYSL	6	Ensembl Compara 87-89|Homologene|InParanoid|OMA|OrthoInspector|OrthoMCL		IPR007955 "Bystin"
WBGene00000280	cah-2	D1022.8	II-5L09	ENSG00000154975	CA10	6	Ensembl Compara 87-89|Homologene|InParanoid|OMA|OrthoInspector|OrthoMCL	SM01057	IPR001148 "Alpha carbonic anhydrase"|IPR018347 "Putative carbonic anhydrase-like protein 2"|IPR023561 "Carbonic anhydrase, alpha-class"
WBGene00000289	cam-1	C01G6.8	II-6L11|II-6L21	ENSG00000169071	ROR2	6	Ensembl Compara 87-89|Homologene|InParanoid|OMA|OrthoInspector|OrthoMCL	SM00130|SM00408|SM00409	IPR000001 "Kringle"|IPR001245 "Serine-threonine/tyrosine-protein kinase catalytic domain"|IPR003598 "Immunoglobulin subtype 2"|IPR003599 "Immunoglobulin subtype"|IPR007110 "Immunoglobulin-like domain"|IPR011009 "Protein kinase-like domain"|IPR013098 "Immunoglobulin I-set"|IPR013783 "Immunoglobulin-like fold"|IPR013806 "Kringle-like fold"|IPR016247 "Tyrosine-protein kinase, receptor ROR"|IPR020635…	Brachydactyly, type B1, 113000|Robinow syndrome, autosomal recessive, 268310
WBGene00000292	cap-1	D2024.6	IV-3J07	ENSG00000116489	CAPZA1	6	Ensembl Compara 87-89|Homologene|InParanoid|OMA|OrthoInspector|OrthoMCL		IPR002189 "F-actin-capping protein subunit alpha"
WBGene00000293	cap-2	M106.5	II-7F03	ENSG00000077549	CAPZB	6	Ensembl Compara 87-89|Homologene|InParanoid|OMA|OrthoInspector|OrthoMCL		IPR001698 "F-actin-capping protein subunit beta"
WBGene00000295	cat-1	W01C8.6	X-3K21	ENSG00000165646	SLC18A2	6	Ensembl Compara 87-89|Homologene|InParanoid|OMA|OrthoInspector|OrthoMCL		IPR011701 "Major facilitator superfamily"|IPR020846 "Major facilitator superfamily domain"
WBGene00000298	cat-4	F32G8.6	V-7E22	ENSG00000131979	GCH1	6	Ensembl Compara 87-89|Homologene|InParanoid|OMA|OrthoInspector|OrthoMCL		IPR001474 "GTP cyclohydrolase I"|IPR020602 "GTP cyclohydrolase I domain"	Dystonia, DOPA-responsive, with or without hyperphenylalaninemia, 128230|Hyperphenylalaninemia, BH4-deficient, B, 233910
WBGene00000368	ccb-1	T28F2.5	I-1D21	ENSG00000182389	CACNB4	6	Ensembl Compara 87-89|Homologene|InParanoid|OMA|OrthoInspector|OrthoMCL	SM00072	IPR000584 "Voltage-dependent calcium channel, L-type, beta subunit"|IPR001452 "SH3 domain"|IPR008145 "Guanylate kinase/L-type calcium channel beta subunit"|IPR027417 "P-loop containing nucleoside triphosphate hydrolase"	Epilepsy, idiopathic generalized, susceptibility to, 9, 607682|Epilepsy, juvenile myoclonic, susceptibility to, 6, 607682|Episodic ataxia, type 5, 613855
WBGene00000369	ccf-1	Y56A3A.20	III-6K17	ENSG00000198791	CNOT7	6	Ensembl Compara 87-89|Homologene|InParanoid|OMA|OrthoInspector|OrthoMCL		IPR006941 "Ribonuclease CAF1"|IPR012337 "Ribonuclease H-like domain"
WBGene00000376	ccr-4	ZC518.3	IV-6H03	ENSG00000138767	CNOT6L	6	Ensembl Compara 87-89|Homologene|InParanoid|OMA|OrthoInspector|OrthoMCL	SM00369	IPR001611 "Leucine-rich repeat"|IPR003591 "Leucine-rich repeat, typical subtype"|IPR005135 "Endonuclease/exonuclease/phosphatase"|IPR032675 "Leucine-rich repeat domain, L domain-like"
WBGene00000377	cct-1	T05C12.7	II-6C15	ENSG00000120438	TCP1	6	Ensembl Compara 87-89|Homologene|InParanoid|OMA|OrthoInspector|OrthoMCL		IPR002423 "Chaperonin Cpn60/TCP-1 family"|IPR012715 "T-complex protein 1, alpha subunit"|IPR017998 "Chaperone tailless complex polypeptide 1 (TCP-1)"|IPR027409 "GroEL-like apical domain"|IPR027410 "TCP-1-like chaperonin intermediate domain"|IPR027413 "GroEL-like equatorial domain"
WBGene00000378	cct-2	T21B10.7	II-6O24	ENSG00000166226	CCT2	6	Ensembl Compara 87-89|Homologene|InParanoid|OMA|OrthoInspector|OrthoMCL		IPR002423 "Chaperonin Cpn60/TCP-1 family"|IPR012716 "T-complex protein 1, beta subunit"|IPR017998 "Chaperone tailless complex polypeptide 1 (TCP-1)"|IPR027409 "GroEL-like apical domain"|IPR027410 "TCP-1-like chaperonin intermediate domain"|IPR027413 "GroEL-like equatorial domain"
WBGene00000379	cct-4	K01C8.10	II-6G17	ENSG00000115484	CCT4	6	Ensembl Compara 87-89|Homologene|InParanoid|OMA|OrthoInspector|OrthoMCL		IPR002423 "Chaperonin Cpn60/TCP-1 family"|IPR012717 "T-complex protein 1, delta subunit"|IPR017998 "Chaperone tailless complex polypeptide 1 (TCP-1)"|IPR027409 "GroEL-like apical domain"|IPR027410 "TCP-1-like chaperonin intermediate domain"|IPR027413 "GroEL-like equatorial domain"
WBGene00000380	cct-5	C07G2.3	III-2C10	ENSG00000150753	CCT5	6	Ensembl Compara 87-89|Homologene|InParanoid|OMA|OrthoInspector|OrthoMCL		IPR002423 "Chaperonin Cpn60/TCP-1 family"|IPR012718 "T-complex protein 1, epsilon subunit"|IPR017998 "Chaperone tailless complex polypeptide 1 (TCP-1)"|IPR027409 "GroEL-like apical domain"|IPR027410 "TCP-1-like chaperonin intermediate domain"|IPR027413 "GroEL-like equatorial domain"	Neuropathy, hereditary sensory, with spastic paraplegia, 256840
WBGene00000381	cct-6	F01F1.8	III-3G13	ENSG00000146731	CCT6A	6	Ensembl Compara 87-89|Homologene|InParanoid|OMA|OrthoInspector|OrthoMCL		IPR002423 "Chaperonin Cpn60/TCP-1 family"|IPR012722 "T-complex protein 1, zeta subunit"|IPR017998 "Chaperone tailless complex polypeptide 1 (TCP-1)"|IPR027409 "GroEL-like apical domain"|IPR027410 "TCP-1-like chaperonin intermediate domain"|IPR027413 "GroEL-like equatorial domain"
WBGene00000396	cdh-4	F25F2.2	III-2C14	ENSG00000083857	FAT1	6	Ensembl Compara 87-89|Homologene|InParanoid|OMA|OrthoInspector|OrthoMCL	SM00112|SM00179|SM00181|SM00282	IPR000742 "EGF-like domain"|IPR001791 "Laminin G domain"|IPR001881 "EGF-like calcium-binding domain"|IPR002126 "Cadherin"|IPR013320 "Concanavalin A-like lectin/glucanase domain"|IPR015919 "Cadherin-like"
WBGene00000403	casy-1	B0034.3	II-10A06|II-4B17	ENSG00000171603	CLSTN1	6	Ensembl Compara 87-89|Homologene|InParanoid|OMA|OrthoInspector|OrthoMCL	SM00112	IPR002126 "Cadherin"|IPR013320 "Concanavalin A-like lectin/glucanase domain"|IPR015919 "Cadherin-like"|IPR026914 "Calsyntenin"
WBGene00000405	cdk-1	T05G5.3	III-5O13	ENSG00000170312	CDK1	6	Ensembl Compara 87-89|Homologene|InParanoid|OMA|OrthoInspector|OrthoMCL	SM00220	IPR000719 "Protein kinase domain"|IPR011009 "Protein kinase-like domain"
WBGene00000407	cdk-5	T27E9.3	III-6P01	ENSG00000164885	CDK5	6	Ensembl Compara 87-89|Homologene|InParanoid|OMA|OrthoInspector|OrthoMCL	SM00220	IPR000719 "Protein kinase domain"|IPR011009 "Protein kinase-like domain"	Lissencephaly 7 with cerebellar hypoplasia, 616342
WBGene00000409	cdk-8	F39H11.3	I-4E16	ENSG00000132964	CDK8	6	Ensembl Compara 87-89|Homologene|InParanoid|OMA|OrthoInspector|OrthoMCL	SM00220	IPR000719 "Protein kinase domain"|IPR011009 "Protein kinase-like domain"
WBGene00000410	cdk-9	H25P06.2	I-5N09	ENSG00000136807	CDK9	6	Ensembl Compara 87-89|Homologene|InParanoid|OMA|OrthoInspector|OrthoMCL	SM00220	IPR000719 "Protein kinase domain"|IPR011009 "Protein kinase-like domain"
WBGene00000416	ced-2	Y41D4B.13	IV-8D15|IV-8D17	ENSG00000167193	CRK	6	Ensembl Compara 87-89|Homologene|InParanoid|OMA|OrthoInspector|OrthoMCL	SM00252|SM00326	IPR000980 "SH2 domain"|IPR001452 "SH3 domain"|IPR011511 "Variant SH3 domain"
WBGene00000419	ced-5	C02F4.1	IV-5F11	ENSG00000150760	DOCK1	6	Ensembl Compara 87-89|Homologene|InParanoid|OMA|OrthoInspector|OrthoMCL	SM00326	IPR001452 "SH3 domain"|IPR010703 "Dedicator of cytokinesis, C-terminal"|IPR011989 "Armadillo-like helical"|IPR016024 "Armadillo-type fold"|IPR026791 "Dedicator of cytokinesis"|IPR027007 "DHR-1 domain"|IPR031057 "DOCK1 homologue"|IPR032376 "Dedicator of cytokinesis, N-terminal domain"
WBGene00000466	cel-1	C03D6.3	I-4F20	ENSG00000111880	RNGTT	6	Ensembl Compara 87-89|Homologene|InParanoid|OMA|OrthoInspector|OrthoMCL		IPR000340 "Dual specificity phosphatase, catalytic domain"|IPR001339 "mRNA capping enzyme, catalytic domain"|IPR012340 "Nucleic acid-binding, OB-fold"|IPR013846 "mRNA capping enzyme, C-terminal"|IPR017074 "mRNA capping enzyme, bifunctional"|IPR029021 "Protein-tyrosine phosphatase-like"
WBGene00000479	cgh-1	C07H6.5	III-4A17	ENSG00000110367	DDX6	6	Ensembl Compara 87-89|Homologene|InParanoid|OMA|OrthoInspector|OrthoMCL	SM00487|SM00490	IPR001650 "Helicase, C-terminal"|IPR011545 "DEAD/DEAH box helicase domain"|IPR014001 "Helicase superfamily 1/2, ATP-binding domain"|IPR027417 "P-loop containing nucleoside triphosphate hydrolase"
WBGene00000480	cgp-1	Y38C9A.2	V-1C07	ENSG00000100226	GTPBP1	6	Ensembl Compara 87-89|Homologene|InParanoid|OMA|OrthoInspector|OrthoMCL		IPR004160 "Translation elongation factor EFTu/EF1A, C-terminal"|IPR004161 "Translation elongation factor EFTu-like, domain 2"|IPR009000 "Translation protein, beta-barrel domain"|IPR009001 "Translation elongation factor EF1A/initiation factor IF2gamma, C-terminal"|IPR027417 "P-loop containing nucleoside triphosphate hydrolase"
WBGene00000482	chd-3	T14G8.1	X-6G01	ENSG00000111642	CHD4	6	Ensembl Compara 87-89|Homologene|InParanoid|OMA|OrthoInspector|OrthoMCL	SM00249|SM00298|SM00487|SM00490|SM01146|SM01147	IPR000330 "SNF2-related, N-terminal domain"|IPR000953 "Chromo/chromo shadow domain"|IPR001650 "Helicase, C-terminal"|IPR001841 "Zinc finger, RING-type"|IPR001965 "Zinc finger, PHD-type"|IPR009462 "Domain of unknown function DUF1086"|IPR009463 "Domain of unknown function DUF1087"|IPR011011 "Zinc finger, FYVE/PHD-type"|IPR012957 "CHD, C-terminal 2"|IPR012958 "CHD, N-terminal"|IPR013083 "Zinc finger…	Sifrim-Hitz-Weiss syndrome, 617159
WBGene00002637	let-418	F26F12.7	V-14A11	ENSG00000111642	CHD4	6	Ensembl Compara 87-89|Homologene|InParanoid|OMA|OrthoInspector|OrthoMCL	SM00249|SM00298|SM00487|SM00490|SM01146|SM01147	IPR000330 "SNF2-related, N-terminal domain"|IPR000953 "Chromo/chromo shadow domain"|IPR001650 "Helicase, C-terminal"|IPR001965 "Zinc finger, PHD-type"|IPR009462 "Domain of unknown function DUF1086"|IPR009463 "Domain of unknown function DUF1087"|IPR011011 "Zinc finger, FYVE/PHD-type"|IPR012957 "CHD, C-terminal 2"|IPR012958 "CHD, N-terminal"|IPR013083 "Zinc finger, RING/FYVE/PHD-type"|IPR014001 "He…	Sifrim-Hitz-Weiss syndrome, 617159
WBGene00000484	che-2	F38G1.1	X-1C17	ENSG00000068885	IFT80	6	Ensembl Compara 87-89|Homologene|InParanoid|OMA|OrthoInspector|OrthoMCL	SM00320	IPR001680 "WD40 repeat"|IPR015943 "WD40/YVTN repeat-like-containing domain"|IPR017986 "WD40-repeat-containing domain"	Short-rib thoracic dysplasia 2 with or without polydactyly, 611263
WBGene00000485	che-3	F18C12.1	I-4A13	ENSG00000187240	DYNC2H1	6	Ensembl Compara 87-89|Homologene|InParanoid|OMA|OrthoInspector|OrthoMCL	SM00382	IPR004273 "Dynein heavy chain domain"|IPR011704 "ATPase, dynein-related, AAA domain"|IPR013594 "Dynein heavy chain, domain-1"|IPR013602 "Dynein heavy chain, domain-2"|IPR024317 "Dynein heavy chain, P-loop containing D4 domain"|IPR024743 "Dynein heavy chain, coiled coil stalk"|IPR026983 "Dynein heavy chain"|IPR027417 "P-loop containing nucleoside triphosphate hydrolase"	Short-rib thoracic dysplasia 3 with or without polydactyly, 613091
WBGene00000490	che-11	C27A7.4	V-8K21	ENSG00000187535	IFT140	6	Ensembl Compara 87-89|Homologene|InParanoid|OMA|OrthoInspector|OrthoMCL	SM00320	IPR011990 "Tetratricopeptide-like helical domain"|IPR015943 "WD40/YVTN repeat-like-containing domain"	Retinitis pigmentosa 80, 617781|Short-rib thoracic dysplasia 9 with or without polydactyly, 266920
WBGene00000492	che-13	F59C6.7	I-5E02|I-5E06	ENSG00000114446	IFT57	6	Ensembl Compara 87-89|Homologene|InParanoid|OMA|OrthoInspector|OrthoMCL		IPR019530 "Intra-flagellar transport protein 57"
WBGene00000498	chk-1	Y39H10A.7	V-13G06|V-13G12	ENSG00000149554	CHEK1	6	Ensembl Compara 87-89|Homologene|InParanoid|OMA|OrthoInspector|OrthoMCL	SM00220	IPR000719 "Protein kinase domain"|IPR011009 "Protein kinase-like domain"
WBGene00000499	chk-2	Y60A3A.12		ENSG00000183765	CHEK2	6	Ensembl Compara 87-89|Homologene|InParanoid|OMA|OrthoInspector|OrthoMCL	SM00220|SM00240	IPR000253 "Forkhead-associated (FHA) domain"|IPR000719 "Protein kinase domain"|IPR008984 "SMAD/FHA domain"|IPR011009 "Protein kinase-like domain"|IPR020636 "Calcium/calmodulin-dependent/calcium-dependent protein kinase"	Breast and colorectal cancer, susceptibility to|Breast cancer, susceptibility to, 114480|Li-Fraumeni syndrome, 609265|Osteosarcoma, somatic, 259500|Prostate cancer, familial, susceptibility to, 176807
WBGene00011612		T08D2.7	V-13E12	ENSG00000183765	CHEK2	6	Ensembl Compara 87-89|Homologene|InParanoid|OMA|OrthoInspector|OrthoMCL	SM00220|SM00240	IPR000253 "Forkhead-associated (FHA) domain"|IPR000719 "Protein kinase domain"|IPR008984 "SMAD/FHA domain"|IPR011009 "Protein kinase-like domain"|IPR020636 "Calcium/calmodulin-dependent/calcium-dependent protein kinase"	Breast and colorectal cancer, susceptibility to|Breast cancer, susceptibility to, 114480|Li-Fraumeni syndrome, 609265|Osteosarcoma, somatic, 259500|Prostate cancer, familial, susceptibility to, 176807
WBGene00000500	chn-1	T09B4.10	I-2N08	ENSG00000103266	STUB1	6	Ensembl Compara 87-89|Homologene|InParanoid|OMA|OrthoInspector|OrthoMCL	SM00028|SM00504	IPR001440 "Tetratricopeptide repeat 1"|IPR003613 "U box domain"|IPR011990 "Tetratricopeptide-like helical domain"|IPR013083 "Zinc finger, RING/FYVE/PHD-type"|IPR019734 "Tetratricopeptide repeat"	Spinocerebellar ataxia, autosomal recessive 16, 615768
WBGene00000501	cho-1	C48D1.3	IV-7C23	ENSG00000115665	SLC5A7	6	Ensembl Compara 87-89|Homologene|InParanoid|OMA|OrthoInspector|OrthoMCL		IPR001734 "Sodium/solute symporter"	Myasthenic syndrome, congenital, 20, presynaptic, 617143|Neuronopathy, distal hereditary motor, type VIIA, 158580
WBGene00000502	chp-1	Y110A7A.13	I-2C24	ENSG00000110172	CHORDC1	6	Ensembl Compara 87-89|Homologene|InParanoid|OMA|OrthoInspector|OrthoMCL		IPR007051 "CHORD domain"|IPR007052 "CS domain"|IPR008978 "HSP20-like chaperone"
WBGene00000503	cht-1	C04F6.3	X-2A16	ENSG00000133063	CHIT1	6	Ensembl Compara 87-89|Homologene|InParanoid|OMA|OrthoInspector|OrthoMCL	SM00494|SM00636	IPR001223 "Glycoside hydrolase family 18, catalytic domain"|IPR002557 "Chitin binding domain"|IPR011583 "Chitinase II"|IPR013781 "Glycoside hydrolase, catalytic domain"|IPR017853 "Glycoside hydrolase superfamily"|IPR029070 "Chitinase insertion domain"	Chitotriosidase deficiency, 614122
WBGene00000506	cic-1	H14E04.5	III-1F15|III-8P18	ENSG00000112237	CCNC	6	Ensembl Compara 87-89|Homologene|InParanoid|OMA|OrthoInspector|OrthoMCL	SM00385	IPR006671 "Cyclin, N-terminal"|IPR013763 "Cyclin-like"
WBGene00000510	cka-2	C52B9.1	X-2H13	ENSG00000110721	CHKA	6	Ensembl Compara 87-89|Homologene|InParanoid|OMA|OrthoInspector|OrthoMCL		IPR011009 "Protein kinase-like domain"
WBGene00000515	ckc-1	T27A10.3	X-2E24	ENSG00000139163	ETNK1	6	Ensembl Compara 87-89|Homologene|InParanoid|OMA|OrthoInspector|OrthoMCL		IPR011009 "Protein kinase-like domain"
WBGene00000519	cku-70	Y47D3A.4	III-5L22	ENSG00000196419	XRCC6	6	Ensembl Compara 87-89|Homologene|InParanoid|OMA|OrthoInspector|OrthoMCL	SM00513|SM00559	IPR002035 "von Willebrand factor, type A"|IPR005160 "Ku70/Ku80 C-terminal arm"|IPR005161 "Ku70/Ku80, N-terminal alpha/beta"|IPR006164 "Ku70/Ku80 beta-barrel domain"|IPR006165 "Ku70"|IPR016194 "SPOC-like, C-terminal domain"
WBGene00000530	clh-3	E04F6.11	II-5B23	ENSG00000114859	CLCN2	6	Ensembl Compara 87-89|Homologene|InParanoid|OMA|OrthoInspector|OrthoMCL		IPR000644 "CBS domain"|IPR001807 "Chloride channel, voltage gated"|IPR013785 "Aldolase-type TIM barrel"|IPR014743 "Chloride channel, core"	Epilepsy, idiopathic generalized, susceptibility to, 11, 607628|Epilepsy, juvenile absence, susceptibility to, 2, 607628|Epilepsy, juvenile myoclonic, susceptibility to, 8, 607628|Leukoencephalopathy with ataxia, 615651
WBGene00000532	clh-5	C07H4.2	II-6F09	ENSG00000109572	CLCN3	6	Ensembl Compara 87-89|Homologene|InParanoid|OMA|OrthoInspector|OrthoMCL	SM00116	IPR000644 "CBS domain"|IPR001807 "Chloride channel, voltage gated"|IPR014743 "Chloride channel, core"
WBGene00000533	clh-6	R07B7.1	V-14D20	ENSG00000103249	CLCN7	6	Ensembl Compara 87-89|Homologene|InParanoid|OMA|OrthoInspector|OrthoMCL	SM00116	IPR000644 "CBS domain"|IPR001807 "Chloride channel, voltage gated"|IPR014743 "Chloride channel, core"	Osteopetrosis, autosomal dominant 2, 166600|Osteopetrosis, autosomal recessive 4, 611490
WBGene00000536	clk-1	ZC395.2	III-2B24	ENSG00000167186	COQ7	6	Ensembl Compara 87-89|Homologene|InParanoid|OMA|OrthoInspector|OrthoMCL		IPR009078 "Ferritin-like superfamily"|IPR011566 "Ubiquinone biosynthesis protein Coq7"|IPR012347 "Ferritin-related"	Coenzyme Q10 deficiency, primary, 8, 616733
WBGene00000539	cln-3.1	F07B10.1	V-15B20	ENSG00000188603	CLN3	6	Ensembl Compara 87-89|Homologene|InParanoid|OMA|OrthoInspector|OrthoMCL		IPR003492 "Batten's disease protein Cln3"|IPR018460 "Batten's disease protein Cln3, subgroup"|IPR020846 "Major facilitator superfamily domain"	Ceroid lipofuscinosis, neuronal, 3, 204200
WBGene00000540	cln-3.2	C01G8.2	I-2I08	ENSG00000188603	CLN3	6	Ensembl Compara 87-89|Homologene|InParanoid|OMA|OrthoInspector|OrthoMCL		IPR003492 "Batten's disease protein Cln3"|IPR018460 "Batten's disease protein Cln3, subgroup"|IPR020846 "Major facilitator superfamily domain"	Ceroid lipofuscinosis, neuronal, 3, 204200
WBGene00000545	clp-4	Y39A3CL.5	III-7I21|III-8N10	ENSG00000203697	CAPN8	6	Ensembl Compara 87-89|Homologene|InParanoid|OMA|OrthoInspector|OrthoMCL	SM00230|SM00720	IPR001300 "Peptidase C2, calpain, catalytic domain"|IPR022682 "Peptidase C2, calpain, large subunit, domain III"|IPR022683 "Peptidase C2, calpain, domain III"|IPR022684 "Peptidase C2, calpain family"
WBGene00000543	clp-2	T04A8.16	III-2K12	ENSG00000131375	CAPN7	6	Ensembl Compara 87-89|Homologene|InParanoid|OMA|OrthoInspector|OrthoMCL	SM00230|SM00720|SM00745	IPR001300 "Peptidase C2, calpain, catalytic domain"|IPR007330 "MIT"|IPR022682 "Peptidase C2, calpain, large subunit, domain III"|IPR022684 "Peptidase C2, calpain family"
WBGene00000549	cls-2	R107.6	III-4J10	ENSG00000163539	CLASP2	6	Ensembl Compara 87-89|Homologene|InParanoid|OMA|OrthoInspector|OrthoMCL	SM01349	IPR011989 "Armadillo-like helical"|IPR016024 "Armadillo-type fold"|IPR024395 "CLASP N-terminal domain"
WBGene00013847	cls-3	ZC84.3	III-4N20	ENSG00000163539	CLASP2	6	Ensembl Compara 87-89|Homologene|InParanoid|OMA|OrthoInspector|OrthoMCL	SM01349	IPR011989 "Armadillo-like helical"|IPR016024 "Armadillo-type fold"|IPR024395 "CLASP N-terminal domain"
WBGene00000566	cnt-2	Y39A1A.15	III-5N23	ENSG00000157985	AGAP1	6	Ensembl Compara 87-89|Homologene|InParanoid|OMA|OrthoInspector|OrthoMCL	SM00105|SM00173|SM00175|SM00233|SM00248	IPR001164 "Arf GTPase activating protein"|IPR001806 "Small GTPase superfamily"|IPR001849 "Pleckstrin homology domain"|IPR002110 "Ankyrin repeat"|IPR011993 "PH domain-like"|IPR020683 "Ankyrin repeat-containing domain"|IPR027417 "P-loop containing nucleoside triphosphate hydrolase"
WBGene00000567	cnx-1	ZK632.6	III-5C10	ENSG00000127022	CANX	6	Ensembl Compara 87-89|Homologene|InParanoid|OMA|OrthoInspector|OrthoMCL		IPR001580 "Calreticulin/calnexin"|IPR009033 "Calreticulin/calnexin, P domain"|IPR013320 "Concanavalin A-like lectin/glucanase domain"
WBGene00000585	cogc-2	C06G3.10	IV-3B05	ENSG00000135775	COG2	6	Ensembl Compara 87-89|Homologene|InParanoid|OMA|OrthoInspector|OrthoMCL		IPR009316 "COG complex component, COG2"|IPR024602 "Conserved oligomeric Golgi complex, subunit 2, N-terminal"|IPR024603 "COG complex component, COG2, C-terminal"	Congenital disorder of glycosylation, type IIq, 617395
WBGene00000761	coq-1	C24A11.9	I-2M12|I-2M22|I-2O02	ENSG00000148459	PDSS1	6	Ensembl Compara 87-89|Homologene|InParanoid|OMA|OrthoInspector|OrthoMCL		IPR000092 "Polyprenyl synthetase"|IPR008949 "Isoprenoid synthase domain"|IPR017446 "Polyprenyl synthetase-related"	Coenzyme Q10 deficiency, primary, 2, 614651
WBGene00000762	coq-2	F57B9.4	III-8L19	ENSG00000173085	COQ2	6	Ensembl Compara 87-89|Homologene|InParanoid|OMA|OrthoInspector|OrthoMCL		IPR000537 "UbiA prenyltransferase family"|IPR006370 "4-hydroxybenzoate polyprenyltransferase"	Coenzyme Q10 deficiency, primary, 1, 607426|Multiple system atrophy, susceptibility to, 146500
WBGene00000763	coq-3	Y57G11C.11	IV-7J03	ENSG00000132423	COQ3	6	Ensembl Compara 87-89|Homologene|InParanoid|OMA|OrthoInspector|OrthoMCL		IPR010233 "Ubiquinone biosynthesis O-methyltransferase"|IPR029063 "S-adenosyl-L-methionine-dependent methyltransferase"
WBGene00000764	coq-4	T03F1.2	I-1L03	ENSG00000167113	COQ4	6	Ensembl Compara 87-89|Homologene|InParanoid|OMA|OrthoInspector|OrthoMCL		IPR007715 "Ubiquinone biosynthesis protein Coq4"	Coenzyme Q10 deficiency, primary, 7, 616276
WBGene00000765	coq-5	ZK652.9	III-8H23	ENSG00000110871	COQ5	6	Ensembl Compara 87-89|Homologene|InParanoid|OMA|OrthoInspector|OrthoMCL		IPR004033 "UbiE/COQ5 methyltransferase"|IPR029063 "S-adenosyl-L-methionine-dependent methyltransferase"
WBGene00000766	coq-6	K07B1.2	V-14A02	ENSG00000119723	COQ6	6	Ensembl Compara 87-89|Homologene|InParanoid|OMA|OrthoInspector|OrthoMCL		IPR000689 "Ubiquinone biosynthesis monooxygenase COQ6"|IPR002938 "FAD-binding domain"|IPR010971 "Ubiquinone biosynthesis hydroxylase UbiH/COQ6"|IPR023753 "FAD/NAD(P)-binding domain"	Coenzyme Q10 deficiency, primary, 6, 614650
WBGene00000768	cor-1	R01H10.3	III-5D01	ENSG00000110880	CORO1C	6	Ensembl Compara 87-89|Homologene|InParanoid|OMA|OrthoInspector|OrthoMCL	SM00320|SM01166|SM01167	IPR001680 "WD40 repeat"|IPR015048 "Domain of unknown function DUF1899"|IPR015505 "Coronin"|IPR015943 "WD40/YVTN repeat-like-containing domain"|IPR017986 "WD40-repeat-containing domain"
WBGene00000773	cpf-1	F28C6.3	II-6C08	ENSG00000101138	CSTF1	6	Ensembl Compara 87-89|Homologene|InParanoid|OMA|OrthoInspector|OrthoMCL	SM00320	IPR001680 "WD40 repeat"|IPR015943 "WD40/YVTN repeat-like-containing domain"|IPR017986 "WD40-repeat-containing domain"|IPR020472 "G-protein beta WD-40 repeat"|IPR032028 "Cleavage stimulation factor subunit 1, dimerisation domain"
WBGene00000778	cpn-2	D1069.2	II-1M13	ENSG00000144834	TAGLN3	6	Ensembl Compara 87-89|Homologene|InParanoid|OMA|OrthoInspector|OrthoMCL	SM00033	IPR000557 "Calponin repeat"|IPR001715 "Calponin homology domain"|IPR003096 "Smooth muscle protein/calponin"
WBGene00000787	cps-6	C41D11.8		ENSG00000167136	ENDOG	6	Ensembl Compara 87-89|Homologene|InParanoid|OMA|OrthoInspector|OrthoMCL	SM00477|SM00892	IPR001604 "DNA/RNA non-specific endonuclease"|IPR020821 "Extracellular Endonuclease, subunit A"
WBGene00000788	cpz-1	F32B5.8	I-1I20	ENSG00000101160	CTSZ	6	Ensembl Compara 87-89|Homologene|InParanoid|OMA|OrthoInspector|OrthoMCL	SM00645	IPR000668 "Peptidase C1A, papain C-terminal"|IPR013128 "Peptidase C1A"
WBGene00000794	crn-1	Y47G6A.8	I-7B06	ENSG00000168496	FEN1	6	Ensembl Compara 87-89|Homologene|InParanoid|OMA|OrthoInspector|OrthoMCL	SM00279|SM00484|SM00485	IPR006084 "XPG/Rad2 endonuclease"|IPR006085 "XPG N-terminal"|IPR006086 "XPG-I domain"|IPR008918 "Helix-hairpin-helix motif, class 2"|IPR020045 "5'-3' exonuclease, C-terminal domain"|IPR029060 "PIN domain-like"
WBGene00000798	crn-5	C14A4.5	II-7K22	ENSG00000077348	EXOSC5	6	Ensembl Compara 87-89|Homologene|InParanoid|OMA|OrthoInspector|OrthoMCL		IPR001247 "Exoribonuclease, phosphorolytic domain 1"|IPR015847 "Exoribonuclease, phosphorolytic domain 2"|IPR020568 "Ribosomal protein S5 domain 2-type fold"|IPR027408 "PNPase/RNase PH domain"
WBGene00007056	crn-7	F09G8.2	III-4K08	ENSG00000105612	DNASE2	6	Ensembl Compara 87-89|Homologene|InParanoid|OMA|OrthoInspector|OrthoMCL		IPR004947 "Deoxyribonuclease II"
WBGene00000799	crn-6	K04H4.6	III-5A19	ENSG00000137976	DNASE2B	6	Ensembl Compara 87-89|Homologene|InParanoid|OMA|OrthoInspector|OrthoMCL		IPR004947 "Deoxyribonuclease II"
WBGene00000802	crt-1	Y38A10A.5	V-4H05	ENSG00000179218	CALR	6	Ensembl Compara 87-89|Homologene|InParanoid|OMA|OrthoInspector|OrthoMCL		IPR001580 "Calreticulin/calnexin"|IPR009033 "Calreticulin/calnexin, P domain"|IPR009169 "Calreticulin"|IPR013320 "Concanavalin A-like lectin/glucanase domain"	Myelofibrosis, somatic, 254450|Thrombocythemia, somatic, 187950
WBGene00000812	csk-1	Y48G1C.2	I-9G08	ENSG00000103653	CSK	6	Ensembl Compara 87-89|Homologene|InParanoid|OMA|OrthoInspector|OrthoMCL	SM00219|SM00252|SM00326	IPR000980 "SH2 domain"|IPR001245 "Serine-threonine/tyrosine-protein kinase catalytic domain"|IPR011009 "Protein kinase-like domain"|IPR020635 "Tyrosine-protein kinase, catalytic domain"
WBGene00000817	csn-5	B0547.1	IV-2N08	ENSG00000121022	COPS5	6	Ensembl Compara 87-89|Homologene|InParanoid|OMA|OrthoInspector|OrthoMCL	SM00232	IPR000555 "JAB1/MPN/MOV34 metalloenzyme domain"
WBGene00000822	csq-1	F40E10.3	X-6H02	ENSG00000143318	CASQ1	6	Ensembl Compara 87-89|Homologene|InParanoid|OMA|OrthoInspector|OrthoMCL		IPR001393 "Calsequestrin"|IPR012336 "Thioredoxin-like fold"	Myopathy, vacuolar, with CASQ1 aggregates, 616231
WBGene00000830	ctl-1	Y54G11A.6		ENSG00000121691	CAT	6	Ensembl Compara 87-89|Homologene|InParanoid|OMA|OrthoInspector|OrthoMCL	SM01060	IPR010582 "Catalase immune-responsive domain"|IPR011614 "Catalase core domain"|IPR018028 "Catalase, mono-functional, haem-containing"|IPR020835 "Catalase-like domain"|IPR024711 "Catalase, mono-functional, haem-containing, clades 1 and 3"	Acatalasemia, 614097
WBGene00013220	ctl-3	Y54G11A.13	II-9I01	ENSG00000121691	CAT	6	Ensembl Compara 87-89|Homologene|InParanoid|OMA|OrthoInspector|OrthoMCL	SM01060	IPR010582 "Catalase immune-responsive domain"|IPR011614 "Catalase core domain"|IPR018028 "Catalase, mono-functional, haem-containing"|IPR020835 "Catalase-like domain"|IPR024711 "Catalase, mono-functional, haem-containing, clades 1 and 3"	Acatalasemia, 614097
WBGene00000832	ctn-1	Y23H5A.5	I-1G18|I-1G20	ENSG00000119326	CTNNAL1	6	Ensembl Compara 87-89|Homologene|InParanoid|OMA|OrthoInspector|OrthoMCL		IPR001033 "Alpha-catenin"|IPR006077 "Vinculin/alpha-catenin"|IPR030045 "Alpha-catulin 1"
WBGene00000833	cts-1	T20G5.2	III-5O22	ENSG00000062485	CS	6	Ensembl Compara 87-89|Homologene|InParanoid|OMA|OrthoInspector|OrthoMCL		IPR002020 "Citrate synthase"|IPR010109 "Citrate synthase, eukaryotic-type"|IPR016142 "Citrate synthase-like, large alpha subdomain"
WBGene00000834	cua-1	Y76A2A.2	III-6N13|III-6N17|III-6N19	ENSG00000165240	ATP7A	6	Ensembl Compara 87-89|Homologene|InParanoid|OMA|OrthoInspector|OrthoMCL		IPR001757 "P-type ATPase"|IPR006121 "Heavy metal-associated domain, HMA"|IPR006122 "Heavy metal-associated domain, copper ion-binding"|IPR008250 "P-type ATPase, A domain"|IPR023214 "HAD-like domain"|IPR023299 "P-type ATPase, cytoplasmic domain N"|IPR027256 "P-type ATPase, subfamily IB"	Menkes disease, 309400|Occipital horn syndrome, 304150|Spinal muscular atrophy, distal, X-linked 3, 300489
WBGene00000836	cul-1	D2045.6	III-5J03	ENSG00000055130	CUL1	6	Ensembl Compara 87-89|Homologene|InParanoid|OMA|OrthoInspector|OrthoMCL	SM00182|SM00884	IPR001373 "Cullin, N-terminal"|IPR011991 "Winged helix-turn-helix DNA-binding domain"|IPR016158 "Cullin homology"|IPR016159 "Cullin repeat-like-containing domain"|IPR019559 "Cullin protein, neddylation domain"
WBGene00000837	cul-2	ZK520.4		ENSG00000108094	CUL2	6	Ensembl Compara 87-89|Homologene|InParanoid|OMA|OrthoInspector|OrthoMCL	SM00182|SM00884	IPR001373 "Cullin, N-terminal"|IPR011991 "Winged helix-turn-helix DNA-binding domain"|IPR016158 "Cullin homology"|IPR016159 "Cullin repeat-like-containing domain"|IPR019559 "Cullin protein, neddylation domain"
WBGene00000838	cul-3	Y108G3AL.1	V-14D24	ENSG00000036257	CUL3	6	Ensembl Compara 87-89|Homologene|InParanoid|OMA|OrthoInspector|OrthoMCL	SM00182|SM00884	IPR001373 "Cullin, N-terminal"|IPR011991 "Winged helix-turn-helix DNA-binding domain"|IPR016158 "Cullin homology"|IPR016159 "Cullin repeat-like-containing domain"|IPR019559 "Cullin protein, neddylation domain"	Pseudohypoaldosteronism, type IIE, 614496
WBGene00000840	cul-5	ZK856.1	V-7G05	ENSG00000166266	CUL5	6	Ensembl Compara 87-89|Homologene|InParanoid|OMA|OrthoInspector|OrthoMCL	SM00182|SM00884	IPR001373 "Cullin, N-terminal"|IPR011991 "Winged helix-turn-helix DNA-binding domain"|IPR016158 "Cullin homology"|IPR016159 "Cullin repeat-like-containing domain"|IPR019559 "Cullin protein, neddylation domain"
WBGene00000843	cup-2	F25D7.1	I-5O09	ENSG00000136986	DERL1	6	Ensembl Compara 87-89|Homologene|InParanoid|OMA|OrthoInspector|OrthoMCL		IPR007599 "Derlin"
WBGene00000846	cup-5	R13A5.1	III-4A23	ENSG00000055732	MCOLN3	6	Ensembl Compara 87-89|Homologene|InParanoid|OMA|OrthoInspector|OrthoMCL		IPR013122 "Polycystin cation channel, PKD1/PKD2"
WBGene00000857	cwn-1	K10B4.6	II-10A11	ENSG00000162552	WNT4	6	Ensembl Compara 87-89|Homologene|InParanoid|OMA|OrthoInspector|OrthoMCL	SM00097	IPR005817 "Wnt"	Mullerian aplasia and hyperandrogenism, 158330|SERKAL syndrome, 611812
WBGene00000858	cwn-2	W01B6.1	IV-5A24	ENSG00000111186	WNT5B	6	Ensembl Compara 87-89|Homologene|InParanoid|OMA|OrthoInspector|OrthoMCL	SM00097	IPR005817 "Wnt"
WBGene00000869	cyc-1	C54G4.8	I-3P14	ENSG00000179091	CYC1	6	Ensembl Compara 87-89|Homologene|InParanoid|OMA|OrthoInspector|OrthoMCL		IPR002326 "Cytochrome c1"|IPR009056 "Cytochrome c-like domain"|IPR021157 "Cytochrome c1, transmembrane anchor, C-terminal"	Mitochondrial complex III deficiency, nuclear type 6, 615453
WBGene00000874	cyk-3	ZK328.1	III-3M05	ENSG00000170832	USP32	6	Ensembl Compara 87-89|Homologene|InParanoid|OMA|OrthoInspector|OrthoMCL	SM00054|SM00695	IPR001394 "Peptidase C19, ubiquitin carboxyl-terminal hydrolase"|IPR002048 "EF-hand domain"|IPR006615 "Peptidase C19, ubiquitin-specific peptidase, DUSP domain"|IPR011992 "EF-hand domain pair"
WBGene00000880	cyn-4	F59E10.2	II-7F07	ENSG00000100023	PPIL2	6	Ensembl Compara 87-89|Homologene|InParanoid|OMA|OrthoInspector|OrthoMCL	SM00504	IPR002130 "Cyclophilin-type peptidyl-prolyl cis-trans isomerase domain"|IPR003613 "U box domain"|IPR013083 "Zinc finger, RING/FYVE/PHD-type"|IPR024936 "Cyclophilin-type peptidyl-prolyl cis-trans isomerase"|IPR027799 "Replication termination factor 2, RING-finger"|IPR029000 "Cyclophilin-like domain"
WBGene00000881	cyn-5	F31C3.1		ENSG00000166794	PPIB	6	Ensembl Compara 87-89|Homologene|InParanoid|OMA|OrthoInspector|OrthoMCL		IPR002130 "Cyclophilin-type peptidyl-prolyl cis-trans isomerase domain"|IPR024936 "Cyclophilin-type peptidyl-prolyl cis-trans isomerase"|IPR029000 "Cyclophilin-like domain"	Osteogenesis imperfecta, type IX, 259440
WBGene00000886	cyn-10	B0252.4	II-11E15	ENSG00000240344	PPIL3	6	Ensembl Compara 87-89|Homologene|InParanoid|OMA|OrthoInspector|OrthoMCL		IPR002130 "Cyclophilin-type peptidyl-prolyl cis-trans isomerase domain"|IPR024936 "Cyclophilin-type peptidyl-prolyl cis-trans isomerase"|IPR029000 "Cyclophilin-like domain"
WBGene00000887	cyn-11	T01B7.4	II-6I04	ENSG00000171960	PPIH	6	Ensembl Compara 87-89|Homologene|InParanoid|OMA|OrthoInspector|OrthoMCL		IPR002130 "Cyclophilin-type peptidyl-prolyl cis-trans isomerase domain"|IPR024936 "Cyclophilin-type peptidyl-prolyl cis-trans isomerase"|IPR029000 "Cyclophilin-like domain"
WBGene00000888	cyn-12	C34D4.12	IV-3D23	ENSG00000137168	PPIL1	6	Ensembl Compara 87-89|Homologene|InParanoid|OMA|OrthoInspector|OrthoMCL		IPR002130 "Cyclophilin-type peptidyl-prolyl cis-trans isomerase domain"|IPR024936 "Cyclophilin-type peptidyl-prolyl cis-trans isomerase"|IPR029000 "Cyclophilin-like domain"
WBGene00000889	cyn-13	Y116A8C.34	IV-10D14	ENSG00000084072	PPIE	6	Ensembl Compara 87-89|Homologene|InParanoid|OMA|OrthoInspector|OrthoMCL	SM00360	IPR000504 "RNA recognition motif domain"|IPR002130 "Cyclophilin-type peptidyl-prolyl cis-trans isomerase domain"|IPR012677 "Nucleotide-binding alpha-beta plait domain"|IPR016304 "Cyclophilin-type peptidyl-prolyl cis-trans isomerase E"|IPR024936 "Cyclophilin-type peptidyl-prolyl cis-trans isomerase"|IPR029000 "Cyclophilin-like domain"
WBGene00000890	sig-7	F39H2.2		ENSG00000131013	PPIL4	6	Ensembl Compara 87-89|Homologene|InParanoid|OMA|OrthoInspector|OrthoMCL	SM00360	IPR000504 "RNA recognition motif domain"|IPR002130 "Cyclophilin-type peptidyl-prolyl cis-trans isomerase domain"|IPR012677 "Nucleotide-binding alpha-beta plait domain"|IPR024936 "Cyclophilin-type peptidyl-prolyl cis-trans isomerase"|IPR029000 "Cyclophilin-like domain"
WBGene00000891	cyn-15	Y87G2A.6	I-6L02	ENSG00000113593	PPWD1	6	Ensembl Compara 87-89|Homologene|InParanoid|OMA|OrthoInspector|OrthoMCL	SM00320	IPR001680 "WD40 repeat"|IPR002130 "Cyclophilin-type peptidyl-prolyl cis-trans isomerase domain"|IPR015943 "WD40/YVTN repeat-like-containing domain"|IPR017986 "WD40-repeat-containing domain"|IPR024936 "Cyclophilin-type peptidyl-prolyl cis-trans isomerase"|IPR029000 "Cyclophilin-like domain"
WBGene00000892	cyn-16	Y17G7B.9	II-11D09	ENSG00000153015	CWC27	6	Ensembl Compara 87-89|Homologene|InParanoid|OMA|OrthoInspector|OrthoMCL		IPR002130 "Cyclophilin-type peptidyl-prolyl cis-trans isomerase domain"|IPR024936 "Cyclophilin-type peptidyl-prolyl cis-trans isomerase"|IPR029000 "Cyclophilin-like domain"	Retinitis pigmentosa with or without skeletal anomalies, 250410
WBGene00000896	dad-1	F57B10.10	I-3O03	ENSG00000129562	DAD1	6	Ensembl Compara 87-89|Homologene|InParanoid|OMA|OrthoInspector|OrthoMCL		IPR003038 "DAD/Ost2"
WBGene00000898	daf-2	Y55D5A.5	III-7G12	ENSG00000140443	IGF1R	6	Ensembl Compara 87-89|Homologene|InParanoid|OMA|OrthoInspector|OrthoMCL	SM00060|SM00219|SM00261	IPR000494 "Receptor L-domain"|IPR001245 "Serine-threonine/tyrosine-protein kinase catalytic domain"|IPR003961 "Fibronectin type III"|IPR006211 "Furin-like cysteine-rich domain"|IPR009030 "Growth factor receptor cysteine-rich domain"|IPR011009 "Protein kinase-like domain"|IPR013783 "Immunoglobulin-like fold"|IPR020635 "Tyrosine-protein kinase, catalytic domain"|IPR032675 "Leucine-rich repeat domai…	Insulin-like growth factor I, resistance to, 270450
WBGene00004856	sma-2	ZK370.2	III-4N03	ENSG00000120693	SMAD9	6	Ensembl Compara 87-89|Homologene|InParanoid|OMA|OrthoInspector|OrthoMCL	SM00523|SM00524	IPR001132 "SMAD domain, Dwarfin-type"|IPR003619 "MAD homology 1, Dwarfin-type"|IPR008984 "SMAD/FHA domain"|IPR013019 "MAD homology, MH1"|IPR013790 "Dwarfin"|IPR017855 "SMAD domain-like"	Pulmonary hypertension, primary, 2, 615342
WBGene00000906	daf-10	F23B2.4	IV-4N07	ENSG00000163913	IFT122	6	Ensembl Compara 87-89|Homologene|InParanoid|OMA|OrthoInspector|OrthoMCL	SM00320	IPR001680 "WD40 repeat"|IPR011990 "Tetratricopeptide-like helical domain"|IPR015943 "WD40/YVTN repeat-like-containing domain"|IPR017986 "WD40-repeat-containing domain"	Cranioectodermal dysplasia 1, 218330
WBGene00000917	daf-25	Y48G1A.3	I-9O16	ENSG00000106524	ANKMY2	6	Ensembl Compara 87-89|Homologene|InParanoid|OMA|OrthoInspector|OrthoMCL	SM00248	IPR002110 "Ankyrin repeat"|IPR002893 "Zinc finger, MYND-type"|IPR020683 "Ankyrin repeat-containing domain"
WBGene00000923	daf-31	K07H8.3	IV-9M13	ENSG00000102030	NAA10	6	Ensembl Compara 87-89|Homologene|InParanoid|OMA|OrthoInspector|OrthoMCL		IPR000182 "GNAT domain"|IPR016181 "Acyl-CoA N-acyltransferase"	Microphthalmia, syndromic 1, 309800|Ogden syndrome, 300855
WBGene00000933	dap-3	C14A4.2	II-10A12	ENSG00000132676	DAP3	6	Ensembl Compara 87-89|Homologene|InParanoid|OMA|OrthoInspector|OrthoMCL		IPR008092 "Ribosomal protein S29, mitochondrial"|IPR019368 "Ribosomal protein S23/S29, mitochondrial"|IPR027417 "P-loop containing nucleoside triphosphate hydrolase"
WBGene00000934	dat-1	T23G5.5	III-4P10	ENSG00000103546	SLC6A2	6	Ensembl Compara 87-89|Homologene|InParanoid|OMA|OrthoInspector|OrthoMCL		IPR000175 "Sodium:neurotransmitter symporter"	Orthostatic intolerance, 604715
WBGene00000937	dbr-1	C55B7.8	I-3K07	ENSG00000138231	DBR1	6	Ensembl Compara 87-89|Homologene|InParanoid|OMA|OrthoInspector|OrthoMCL	SM01124	IPR004843 "Calcineurin-like phosphoesterase domain, apaH type"|IPR007708 "Lariat debranching enzyme, C-terminal"|IPR029052 "Metallo-dependent phosphatase-like"
WBGene00000940	dcs-1	Y113G7A.9	V-12J18	ENSG00000110063	DCPS	6	Ensembl Compara 87-89|Homologene|InParanoid|OMA|OrthoInspector|OrthoMCL		IPR008594 "Scavenger mRNA decapping enzyme DcpS/DCS2"|IPR011145 "Scavenger mRNA decapping enzyme, N-terminal"|IPR011146 "HIT-like domain"	Al-Raqad syndrome, 616459
WBGene00000958	dgk-1	C09E10.2		ENSG00000145214	DGKQ	6	Ensembl Compara 87-89|Homologene|InParanoid|OMA|OrthoInspector|OrthoMCL	SM00045|SM00046|SM00109|SM00314	IPR000159 "Ras-associating (RA) domain"|IPR000756 "Diacylglycerol kinase, accessory domain"|IPR001206 "Diacylglycerol kinase, catalytic domain"|IPR001965 "Zinc finger, PHD-type"|IPR002219 "Protein kinase C-like, phorbol ester/diacylglycerol-binding domain"|IPR016064 "NAD kinase/diacylglycerol kinase-like domain"|IPR020454 "Diacylglycerol/phorbol-ester binding"|IPR029071 "Ubiquitin-related domain"
WBGene00000959	dgk-2	F46H6.2	X-2P03|X-2P05	ENSG00000153933	DGKE	6	Ensembl Compara 87-89|Homologene|InParanoid|OMA|OrthoInspector|OrthoMCL	SM00045|SM00046|SM00109	IPR000756 "Diacylglycerol kinase, accessory domain"|IPR001206 "Diacylglycerol kinase, catalytic domain"|IPR002219 "Protein kinase C-like, phorbol ester/diacylglycerol-binding domain"|IPR016064 "NAD kinase/diacylglycerol kinase-like domain"	Hemolytic uremic syndrome, atypical, susceptibility to, 7, 615008|Nephrotic syndrome, type 7, 615008
WBGene00000960	dgk-3	F54G8.2	III-4N08	ENSG00000136267	DGKB	6	Ensembl Compara 87-89|Homologene|InParanoid|OMA|OrthoInspector|OrthoMCL	SM00045|SM00046|SM00054|SM00109	IPR000756 "Diacylglycerol kinase, accessory domain"|IPR001206 "Diacylglycerol kinase, catalytic domain"|IPR002048 "EF-hand domain"|IPR002219 "Protein kinase C-like, phorbol ester/diacylglycerol-binding domain"|IPR011992 "EF-hand domain pair"|IPR016064 "NAD kinase/diacylglycerol kinase-like domain"|IPR029477 "Diacylglycerol kinase type I, N-terminal"
WBGene00000962	dhc-1	T21E12.4	I-1P04	ENSG00000197102	DYNC1H1	6	Ensembl Compara 87-89|Homologene|InParanoid|OMA|OrthoInspector|OrthoMCL	SM00382	IPR003593 "AAA+ ATPase domain"|IPR004273 "Dynein heavy chain domain"|IPR011704 "ATPase, dynein-related, AAA domain"|IPR013594 "Dynein heavy chain, domain-1"|IPR013602 "Dynein heavy chain, domain-2"|IPR024317 "Dynein heavy chain, P-loop containing D4 domain"|IPR024743 "Dynein heavy chain, coiled coil stalk"|IPR026983 "Dynein heavy chain"|IPR027417 "P-loop containing nucleoside triphosphate hydrola…	Charcot-Marie-Tooth disease, axonal, type 20, 614228|Mental retardation, autosomal dominant 13, 614563|Spinal muscular atrophy, lower extremity-predominant 1, AD, 158600
WBGene00000963	dhp-1	R06C7.3	I-3H01	ENSG00000147647	DPYS	6	Ensembl Compara 87-89|Homologene|InParanoid|OMA|OrthoInspector|OrthoMCL		IPR006680 "Amidohydrolase-related"|IPR011059 "Metal-dependent hydrolase, composite domain"|IPR011778 "Hydantoinase/dihydropyrimidinase"|IPR032466 "Metal-dependent hydrolase"	Dihydropyrimidinuria, 222748
WBGene00000964	dhp-2	C47E12.8	IV-5O05	ENSG00000147647	DPYS	6	Ensembl Compara 87-89|Homologene|InParanoid|OMA|OrthoInspector|OrthoMCL		IPR006680 "Amidohydrolase-related"|IPR011059 "Metal-dependent hydrolase, composite domain"|IPR011778 "Hydantoinase/dihydropyrimidinase"|IPR032466 "Metal-dependent hydrolase"	Dihydropyrimidinuria, 222748
WBGene00000982	dhs-19	T11F9.11	V-7F20	ENSG00000170786	SDR16C5	6	Ensembl Compara 87-89|Homologene|InParanoid|OMA|OrthoInspector|OrthoMCL		IPR002347 "Short-chain dehydrogenase/reductase SDR"|IPR016040 "NAD(P)-binding domain"
WBGene00002891	let-767	C56G2.6	III-3I14	ENSG00000149084	HSD17B12	6	Ensembl Compara 87-89|Homologene|InParanoid|OMA|OrthoInspector|OrthoMCL		IPR002347 "Short-chain dehydrogenase/reductase SDR"|IPR016040 "NAD(P)-binding domain"
WBGene00000981	dhs-18	C45B11.3	V-7F19	ENSG00000119471	HSDL2	6	Ensembl Compara 87-89|Homologene|InParanoid|OMA|OrthoInspector|OrthoMCL		IPR002347 "Short-chain dehydrogenase/reductase SDR"|IPR016040 "NAD(P)-binding domain"
WBGene00000973	dhs-9	Y32H12A.3	III-2H04|III-2H08	ENSG00000157379	DHRS1	6	Ensembl Compara 87-89|Homologene|InParanoid|OMA|OrthoInspector|OrthoMCL		IPR002347 "Short-chain dehydrogenase/reductase SDR"|IPR016040 "NAD(P)-binding domain"
WBGene00000993	dhs-30	T25G12.7	X-7B20	ENSG00000109016	DHRS7B	6	Ensembl Compara 87-89|Homologene|InParanoid|OMA|OrthoInspector|OrthoMCL		IPR002347 "Short-chain dehydrogenase/reductase SDR"|IPR016040 "NAD(P)-binding domain"
WBGene00000996	dif-1	F49E8.5	IV-3F16	ENSG00000178537	SLC25A20	6	Ensembl Compara 87-89|Homologene|InParanoid|OMA|OrthoInspector|OrthoMCL		IPR002113 "Adenine nucleotide translocator 1"|IPR018108 "Mitochondrial substrate/solute carrier"|IPR023395 "Mitochondrial carrier domain"	Carnitine-acylcarnitine translocase deficiency, 212138
WBGene00001001	dis-3	C04G2.6	IV-5E02	ENSG00000083520	DIS3	6	Ensembl Compara 87-89|Homologene|InParanoid|OMA|OrthoInspector|OrthoMCL	SM00670|SM00955	IPR002716 "PIN domain"|IPR012340 "Nucleic acid-binding, OB-fold"
WBGene00001007	dli-1	C39E9.14	IV-7A05	ENSG00000135720	DYNC1LI2	6	Ensembl Compara 87-89|Homologene|InParanoid|OMA|OrthoInspector|OrthoMCL		IPR008467 "Dynein 1 light intermediate chain"|IPR022780 "Dynein family light intermediate chain"|IPR027417 "P-loop containing nucleoside triphosphate hydrolase"
WBGene00001016	dna-2	F43G6.1	II-8A21	ENSG00000138346	DNA2	6	Ensembl Compara 87-89|Homologene|InParanoid|OMA|OrthoInspector|OrthoMCL		IPR014808 "DNA replication factor Dna2, N-terminal"|IPR027417 "P-loop containing nucleoside triphosphate hydrolase"	Progressive external ophthalmoplegia with mitochondrial DNA deletions, autosomal dominant 6, 615156|Seckel syndrome 8, 615807
WBGene00001019	dnj-1	B0035.14	IV-6E11	ENSG00000148719	DNAJB12	6	Ensembl Compara 87-89|Homologene|InParanoid|OMA|OrthoInspector|OrthoMCL	SM00271	IPR001623 "DnaJ domain"|IPR015399 "Domain of unknown function DUF1977, DnaJ-like"
WBGene00001020	dnj-2	B0035.2	IV-6C11	ENSG00000059769	DNAJC25	6	Ensembl Compara 87-89|Homologene|InParanoid|OMA|OrthoInspector|OrthoMCL	SM00271	IPR001623 "DnaJ domain"
WBGene00001025	dnj-7	C55B6.2	X-3D02	ENSG00000102580	DNAJC3	6	Ensembl Compara 87-89|Homologene|InParanoid|OMA|OrthoInspector|OrthoMCL	SM00028|SM00271	IPR001440 "Tetratricopeptide repeat 1"|IPR001623 "DnaJ domain"|IPR011990 "Tetratricopeptide-like helical domain"|IPR019734 "Tetratricopeptide repeat"	Ataxia, combined cerebellar and peripheral, with hearing loss and diabetes mellitus, 616192
WBGene00001046	dnj-28	Y54E10BL.4	I-7N02	ENSG00000102580	DNAJC3	6	Ensembl Compara 87-89|Homologene|InParanoid|OMA|OrthoInspector|OrthoMCL	SM00028|SM00271	IPR001623 "DnaJ domain"|IPR011990 "Tetratricopeptide-like helical domain"|IPR013105 "Tetratricopeptide repeat 2"|IPR019734 "Tetratricopeptide repeat"	Ataxia, combined cerebellar and peripheral, with hearing loss and diabetes mellitus, 616192
WBGene00001026	dnj-8	C56C10.13	II-5I09	ENSG00000116138	DNAJC16	6	Ensembl Compara 87-89|Homologene|InParanoid|OMA|OrthoInspector|OrthoMCL	SM00271	IPR001623 "DnaJ domain"|IPR012336 "Thioredoxin-like fold"|IPR013766 "Thioredoxin domain"
WBGene00001027	dnj-9	F11G11.7	II-10A13	ENSG00000007923	DNAJC11	6	Ensembl Compara 87-89|Homologene|InParanoid|OMA|OrthoInspector|OrthoMCL	SM00271	IPR001623 "DnaJ domain"|IPR024586 "DnaJ-like protein C11, C-terminal"
WBGene00001029	dnj-11	F38A5.13	IV-3C10	ENSG00000105821	DNAJC2	6	Ensembl Compara 87-89|Homologene|InParanoid|OMA|OrthoInspector|OrthoMCL	SM00271|SM00717	IPR001005 "SANT/Myb domain"|IPR001623 "DnaJ domain"|IPR009057 "Homeodomain-like"|IPR032003 "Ribosome-associated complex head domain"
WBGene00001030	dnj-12	F39B2.10	I-7I02	ENSG00000140403	DNAJA4	6	Ensembl Compara 87-89|Homologene|InParanoid|OMA|OrthoInspector|OrthoMCL	SM00271	IPR001305 "Heat shock protein DnaJ, cysteine-rich domain"|IPR001623 "DnaJ domain"|IPR002939 "Chaperone DnaJ, C-terminal"|IPR008971 "HSP40/DnaJ peptide-binding"
WBGene00001033	dnj-15	K08D10.2	IV-2I11	ENSG00000100209	HSCB	6	Ensembl Compara 87-89|Homologene|InParanoid|OMA|OrthoInspector|OrthoMCL		IPR001623 "DnaJ domain"|IPR004640 "Co-chaperone Hsc20"|IPR009073 "Co-chaperone HscB, C-terminal oligomerisation domain"
WBGene00001035	dnj-17	T03F6.2	III-6L01	ENSG00000168724	DNAJC21	6	Ensembl Compara 87-89|Homologene|InParanoid|OMA|OrthoInspector|OrthoMCL	SM00271|SM00355|SM00451	IPR001623 "DnaJ domain"|IPR003604 "Zinc finger, U1-type"|IPR015880 "Zinc finger, C2H2-like"|IPR022755 "Zinc finger, double-stranded RNA binding"	Bone marrow failure syndrome 3, 617052
WBGene00001038	dnj-20	T15H9.7	II-11E01|II-6J14	ENSG00000090520	DNAJB11	6	Ensembl Compara 87-89|Homologene|InParanoid|OMA|OrthoInspector|OrthoMCL	SM00271	IPR001623 "DnaJ domain"|IPR002939 "Chaperone DnaJ, C-terminal"|IPR008971 "HSP40/DnaJ peptide-binding"
WBGene00001041	dnj-23	T24H10.3	II-6F15	ENSG00000213551	DNAJC9	6	Ensembl Compara 87-89|Homologene|InParanoid|OMA|OrthoInspector|OrthoMCL	SM00271	IPR001623 "DnaJ domain"
WBGene00001042	dnj-24	W03A5.7	III-2H22	ENSG00000105993	DNAJB6	6	Ensembl Compara 87-89|Homologene|InParanoid|OMA|OrthoInspector|OrthoMCL	SM00271	IPR001623 "DnaJ domain"	Muscular dystrophy, limb-girdle, type 1E, 603511
WBGene00001045	dnj-27	Y47H9C.5		ENSG00000077232	DNAJC10	6	Ensembl Compara 87-89|Homologene|InParanoid|OMA|OrthoInspector|OrthoMCL	SM00271	IPR001623 "DnaJ domain"|IPR012336 "Thioredoxin-like fold"|IPR013766 "Thioredoxin domain"|IPR021170 "DnaJ homologue subfamily C member 10"
WBGene00001047	dnj-29	Y63D3A.6	I-7G07	ENSG00000025796	SEC63	6	Ensembl Compara 87-89|Homologene|InParanoid|OMA|OrthoInspector|OrthoMCL	SM00271|SM00973	IPR000008 "C2 domain"|IPR001623 "DnaJ domain"|IPR004179 "Sec63 domain"|IPR014756 "Immunoglobulin E-set"	Polycystic liver disease 2, 617004
WBGene00001048	dnj-30	Y71F9B.16	I-8I05	ENSG00000126698	DNAJC8	6	Ensembl Compara 87-89|Homologene|InParanoid|OMA|OrthoInspector|OrthoMCL	SM00271	IPR001623 "DnaJ domain"
WBGene00001051	cks-1	C09G4.3	IV-4I08	ENSG00000173207	CKS1B	6	Ensembl Compara 87-89|Homologene|InParanoid|OMA|OrthoInspector|OrthoMCL	SM01084	IPR000789 "Cyclin-dependent kinase, regulatory subunit"
WBGene00001055	dpf-2	C27C12.7	X-6L12	ENSG00000197635	DPP4	6	Ensembl Compara 87-89|Homologene|InParanoid|OMA|OrthoInspector|OrthoMCL		IPR001375 "Peptidase S9, prolyl oligopeptidase, catalytic domain"|IPR002469 "Dipeptidylpeptidase IV, N-terminal domain"|IPR029058 "Alpha/Beta hydrolase fold"
WBGene00001058	dpf-5	R11E3.8	IV-2B15|IV-2B23	ENSG00000164062	APEH	6	Ensembl Compara 87-89|Homologene|InParanoid|OMA|OrthoInspector|OrthoMCL		IPR001375 "Peptidase S9, prolyl oligopeptidase, catalytic domain"|IPR011042 "Six-bladed beta-propeller, TolB-like"|IPR029058 "Alpha/Beta hydrolase fold"
WBGene00001073	dpy-11	F46E10.9	V-4F04	ENSG00000139921	TMX1	6	Ensembl Compara 87-89|Homologene|InParanoid|OMA|OrthoInspector|OrthoMCL		IPR012336 "Thioredoxin-like fold"|IPR013766 "Thioredoxin domain"
WBGene00001077	dpy-18	Y47D3B.10	III-5P24|III-6C05	ENSG00000122884	P4HA1	6	Ensembl Compara 87-89|Homologene|InParanoid|OMA|OrthoInspector|OrthoMCL	SM00702	IPR005123 "Oxoglutarate/iron-dependent dioxygenase"|IPR006620 "Prolyl 4-hydroxylase, alpha subunit"|IPR011990 "Tetratricopeptide-like helical domain"|IPR013547 "Prolyl 4-hydroxylase alpha-subunit, N-terminal"
WBGene00004025	phy-2	F35G2.4	IV-6B13	ENSG00000122884	P4HA1	6	Ensembl Compara 87-89|Homologene|InParanoid|OMA|OrthoInspector|OrthoMCL	SM00702	IPR005123 "Oxoglutarate/iron-dependent dioxygenase"|IPR006620 "Prolyl 4-hydroxylase, alpha subunit"|IPR011990 "Tetratricopeptide-like helical domain"|IPR013547 "Prolyl 4-hydroxylase alpha-subunit, N-terminal"
WBGene00001078	dpy-19	F22B7.10	III-4J19	ENSG00000173852	DPY19L1	6	Ensembl Compara 87-89|Homologene|InParanoid|OMA|OrthoInspector|OrthoMCL		IPR011330 "Glycoside hydrolase/deacetylase, beta/alpha-barrel"|IPR018732 "Dpy-19/Dpy-19-like"|IPR030038 "C-mannosyltransferase Dpy-19"
WBGene00001082	dpy-23	R160.1	X-2L07	ENSG00000161203	AP2M1	6	Ensembl Compara 87-89|Homologene|InParanoid|OMA|OrthoInspector|OrthoMCL		IPR001392 "Clathrin adaptor, mu subunit"|IPR011012 "Longin-like domain"|IPR022775 "AP complex, mu/sigma subunit"|IPR028565 "Mu homology domain"
WBGene00001089	dre-1	K04A8.6	V-14L07	ENSG00000138081	FBXO11	6	Ensembl Compara 87-89|Homologene|InParanoid|OMA|OrthoInspector|OrthoMCL	SM00256|SM00396|SM00710|SM00722	IPR001810 "F-box domain"|IPR003126 "Zinc finger, UBR-type"|IPR006626 "Parallel beta-helix repeat"|IPR006633 "Carbohydrate-binding/sugar hydrolysis domain"|IPR011050 "Pectin lyase fold/virulence factor"|IPR012334 "Pectin lyase fold"|IPR022441 "Parallel beta-helix repeat-2"|IPR029799 "F-box only protein 11"
WBGene00001090	drh-1	F15B10.2	IV-3C14	ENSG00000107201	DDX58	6	Ensembl Compara 87-89|Homologene|InParanoid|OMA|OrthoInspector|OrthoMCL	SM00487|SM00490	IPR001650 "Helicase, C-terminal"|IPR006935 "Helicase/UvrB, N-terminal"|IPR014001 "Helicase superfamily 1/2, ATP-binding domain"|IPR021673 "C-terminal domain of RIG-I"|IPR027417 "P-loop containing nucleoside triphosphate hydrolase"	Singleton-Merten syndrome 2, 616298
WBGene00001092	dro-1	F53A2.5	III-6J13	ENSG00000117505	DR1	6	Ensembl Compara 87-89|Homologene|InParanoid|OMA|OrthoInspector|OrthoMCL		IPR003958 "Transcription factor CBF/NF-Y/archaeal histone domain"|IPR009072 "Histone-fold"
WBGene00001094	dars-1	B0464.1	III-5E05	ENSG00000115866	DARS	6	Ensembl Compara 87-89|Homologene|InParanoid|OMA|OrthoInspector|OrthoMCL		IPR002312 "Aspartyl/Asparaginyl-tRNA synthetase, class IIb"|IPR004364 "Aminoacyl-tRNA synthetase, class II (D/K/N)"|IPR004365 "OB-fold nucleic acid binding domain, AA-tRNA synthetase-type"|IPR004523 "Aspartyl-tRNA synthetase, archaeal-type"|IPR012340 "Nucleic acid-binding, OB-fold"|IPR018150 "Aminoacyl-tRNA synthetase, class II (D/K/N)-like"	Hypomyelination with brainstem and spinal cord involvement and leg spasticity, 615281
WBGene00001095	dars-2	F10C2.6	V-14A03	ENSG00000117593	DARS2	6	Ensembl Compara 87-89|Homologene|InParanoid|OMA|OrthoInspector|OrthoMCL		IPR002312 "Aspartyl/Asparaginyl-tRNA synthetase, class IIb"|IPR004115 "GAD-like domain"|IPR004364 "Aminoacyl-tRNA synthetase, class II (D/K/N)"|IPR004365 "OB-fold nucleic acid binding domain, AA-tRNA synthetase-type"|IPR004524 "Aspartate-tRNA ligase, bacterial/mitochondrial-type"|IPR012340 "Nucleic acid-binding, OB-fold"|IPR018150 "Aminoacyl-tRNA synthetase, class II (D/K/N)-like"	Leukoencephalopathy with brain stem and spinal cord involvement and lactate elevation, 611105
WBGene00001101	dsh-1	C34F11.9	II-4C12|II-4E04	ENSG00000004975	DVL2	6	Ensembl Compara 87-89|Homologene|InParanoid|OMA|OrthoInspector|OrthoMCL	SM00021|SM00049|SM00228	IPR000591 "DEP domain"|IPR001158 "DIX domain"|IPR001478 "PDZ domain"|IPR003351 "Dishevelled protein domain"|IPR008339 "Dishevelled family"|IPR011991 "Winged helix-turn-helix DNA-binding domain"|IPR015506 "Dishevelled-related protein"|IPR026542 "Dishevelled Dsh"|IPR029071 "Ubiquitin-related domain"
WBGene00001115	dyb-1	F47G6.1	I-1A02	ENSG00000138101	DTNB	6	Ensembl Compara 87-89|Homologene|InParanoid|OMA|OrthoInspector|OrthoMCL	SM00291	IPR000433 "Zinc finger, ZZ-type"|IPR011992 "EF-hand domain pair"|IPR015153 "EF-hand domain, type 1"|IPR015154 "EF-hand domain, type 2"|IPR017432 "Distrobrevin"
WBGene00001117	dyf-1	F54C1.5	I-2A06	ENSG00000196659	TTC30B	6	Ensembl Compara 87-89|Homologene|InParanoid|OMA|OrthoInspector|OrthoMCL	SM00028	IPR011990 "Tetratricopeptide-like helical domain"|IPR019734 "Tetratricopeptide repeat"
WBGene00001118	dyf-2	ZK520.3	III-6F10|III-6F14	ENSG00000157796	WDR19	6	Ensembl Compara 87-89|Homologene|InParanoid|OMA|OrthoInspector|OrthoMCL	SM00320	IPR001680 "WD40 repeat"|IPR011990 "Tetratricopeptide-like helical domain"|IPR015943 "WD40/YVTN repeat-like-containing domain"|IPR017986 "WD40-repeat-containing domain"	Cranioectodermal dysplasia 4, 614378|Nephronophthisis 13, 614377|Senior-Loken syndrome 8, 616307|Short-rib thoracic dysplasia 5 with or without polydactyly, 614376
WBGene00001119	dyf-3	C04C3.5	IV-1F08	ENSG00000103351	CLUAP1	6	Ensembl Compara 87-89|Homologene|InParanoid|OMA|OrthoInspector|OrthoMCL		IPR019366 "Clusterin-associated protein-1"
WBGene00001129	dyf-13	C27H5.7	II-5O24	ENSG00000105948	TTC26	6	Ensembl Compara 87-89|Homologene|InParanoid|OMA|OrthoInspector|OrthoMCL	SM00028	IPR011990 "Tetratricopeptide-like helical domain"|IPR030511 "Tetratricopeptide repeat protein 26"
WBGene00001130	dyn-1	C02C6.1	X-7K09	ENSG00000106976	DNM1	6	Ensembl Compara 87-89|Homologene|InParanoid|OMA|OrthoInspector|OrthoMCL	SM00053|SM00233|SM00302	IPR000375 "Dynamin central domain"|IPR001401 "Dynamin, GTPase domain"|IPR001849 "Pleckstrin homology domain"|IPR003130 "Dynamin GTPase effector"|IPR011993 "PH domain-like"|IPR022812 "Dynamin superfamily"|IPR027417 "P-loop containing nucleoside triphosphate hydrolase"	Epileptic encephalopathy, early infantile, 31, 616346
WBGene00001134	eat-3	D2013.5	II-6L23	ENSG00000198836	OPA1	6	Ensembl Compara 87-89|Homologene|InParanoid|OMA|OrthoInspector|OrthoMCL	SM00053	IPR001401 "Dynamin, GTPase domain"|IPR022812 "Dynamin superfamily"|IPR027417 "P-loop containing nucleoside triphosphate hydrolase"|IPR033047 "Dynamin-like 120 kDa protein, mitochondrial"	Behr syndrome, 210000|Glaucoma, normal tension, susceptibility to, 606657|Mitochondrial DNA depletion syndrome 14 (encephalocardiomyopathic type), 616896|Optic atrophy 1, 165500|Optic atrophy plus syndrome, 125250
WBGene00001135	eat-4	ZK512.6	III-4L24|III-4N02	ENSG00000104888	SLC17A7	6	Ensembl Compara 87-89|Homologene|InParanoid|OMA|OrthoInspector|OrthoMCL		IPR011701 "Major facilitator superfamily"|IPR020846 "Major facilitator superfamily domain"
WBGene00001137	eat-6	B0365.3	V-8P13	ENSG00000105409	ATP1A3	6	Ensembl Compara 87-89|Homologene|InParanoid|OMA|OrthoInspector|OrthoMCL	SM00831	IPR001757 "P-type ATPase"|IPR004014 "Cation-transporting P-type ATPase, N-terminal"|IPR005775 "P-type ATPase, subfamily IIC"|IPR006068 "Cation-transporting P-type ATPase, C-terminal"|IPR008250 "P-type ATPase, A domain"|IPR023214 "HAD-like domain"|IPR023298 "P-type ATPase, transmembrane domain"|IPR023299 "P-type ATPase, cytoplasmic domain N"	Alternating hemiplegia of childhood 2, 614820|CAPOS syndrome, 601338|Dystonia-12, 128235
WBGene00001149	bcat-1	K02A4.1	X-6G09	ENSG00000060982	BCAT1	6	Ensembl Compara 87-89|Homologene|InParanoid|OMA|OrthoInspector|OrthoMCL		IPR001544 "Aminotransferase class IV"|IPR005786 "Branched-chain amino acid aminotransferase II"	Hyperleucinemia-isoleucinemia or hypervalinemia
WBGene00020347	ech-1.2	T08B2.7	I-2P06|I-2P08	ENSG00000084754	HADHA	6	Ensembl Compara 87-89|Homologene|InParanoid|OMA|OrthoInspector|OrthoMCL		IPR001753 "Crotonase superfamily"|IPR006108 "3-hydroxyacyl-CoA dehydrogenase, C-terminal"|IPR006176 "3-hydroxyacyl-CoA dehydrogenase, NAD binding"|IPR008927 "6-phosphogluconate dehydrogenase C-terminal domain-like"|IPR012803 "Fatty acid oxidation complex, alpha subunit, mitochondrial"|IPR013328 "6-phosphogluconate dehydrogenase, domain 2"|IPR016040 "NAD(P)-binding domain"|IPR029045 "ClpP/crotonas…	Fatty liver, acute, of pregnancy, 609016|HELLP syndrome, maternal, of pregnancy, 609016|LCHAD deficiency, 609016|Trifunctional protein deficiency, 609015
WBGene00001151	ech-2	F38H4.8	IV-6G04	ENSG00000134463	ECHDC3	6	Ensembl Compara 87-89|Homologene|InParanoid|OMA|OrthoInspector|OrthoMCL		IPR001753 "Crotonase superfamily"|IPR029045 "ClpP/crotonase-like domain"
WBGene00001153	ech-4	R06F6.9	II-7D11	ENSG00000198721	ECI2	6	Ensembl Compara 87-89|Homologene|InParanoid|OMA|OrthoInspector|OrthoMCL		IPR000582 "Acyl-CoA-binding protein, ACBP"|IPR001753 "Crotonase superfamily"|IPR014352 "FERM/acyl-CoA-binding protein, 3-helical bundle"|IPR029045 "ClpP/crotonase-like domain"
WBGene00001154	ech-5	F56B3.5	IV-9L08	ENSG00000148090	AUH	6	Ensembl Compara 87-89|Homologene|InParanoid|OMA|OrthoInspector|OrthoMCL		IPR001753 "Crotonase superfamily"|IPR014748 "Crontonase, C-terminal"|IPR029045 "ClpP/crotonase-like domain"	3-methylglutaconic aciduria, type I, 250950
WBGene00001155	ech-6	T05G5.6	III-5O19	ENSG00000127884	ECHS1	6	Ensembl Compara 87-89|Homologene|InParanoid|OMA|OrthoInspector|OrthoMCL		IPR001753 "Crotonase superfamily"|IPR014748 "Crontonase, C-terminal"|IPR029045 "ClpP/crotonase-like domain"	Mitochondrial short-chain enoyl-CoA hydratase 1 deficiency, 616277
WBGene00007129		B0272.3	X-4P13	ENSG00000138796	HADH	6	Ensembl Compara 87-89|Homologene|InParanoid|OMA|OrthoInspector|OrthoMCL		IPR006108 "3-hydroxyacyl-CoA dehydrogenase, C-terminal"|IPR006176 "3-hydroxyacyl-CoA dehydrogenase, NAD binding"|IPR008927 "6-phosphogluconate dehydrogenase C-terminal domain-like"|IPR013328 "6-phosphogluconate dehydrogenase, domain 2"|IPR016040 "NAD(P)-binding domain"|IPR022694 "3-hydroxyacyl-CoA dehydrogenase"	3-hydroxyacyl-CoA dehydrogenase deficiency, 231530|Hyperinsulinemic hypoglycemia, familial, 4, 609975
WBGene00001160	efk-1	F42A10.4	III-3A12	ENSG00000103319	EEF2K	6	Ensembl Compara 87-89|Homologene|InParanoid|OMA|OrthoInspector|OrthoMCL	SM00811	IPR004166 "MHCK/EF2 kinase"|IPR011009 "Protein kinase-like domain"|IPR011990 "Tetratricopeptide-like helical domain"|IPR017400 "Eukaryotic elongation factor 2 kinase"
WBGene00001167	eef-2	F25H5.4	I-4F09	ENSG00000167658	EEF2	6	Ensembl Compara 87-89|Homologene|InParanoid|OMA|OrthoInspector|OrthoMCL	SM00838|SM00889	IPR000640 "Translation elongation factor EFG, V domain"|IPR000795 "Transcription factor, GTP-binding domain"|IPR004161 "Translation elongation factor EFTu-like, domain 2"|IPR005225 "Small GTP-binding protein domain"|IPR005517 "Translation elongation factor EFG/EF2, domain IV"|IPR009000 "Translation protein, beta-barrel domain"|IPR009022 "Elongation factor G, III-V domain"|IPR014721 "Ribosomal pro…	Spinocerebellar ataxia 26, 609306
WBGene00001172	egl-3	C51E3.7	V-7G01	ENSG00000125851	PCSK2	6	Ensembl Compara 87-89|Homologene|InParanoid|OMA|OrthoInspector|OrthoMCL		IPR000209 "Peptidase S8/S53 domain"|IPR002884 "Proprotein convertase, P"|IPR008979 "Galactose-binding domain-like"|IPR009020 "Proteinase propeptide inhibitor"|IPR015500 "Peptidase S8, subtilisin-related"|IPR032815 "Peptidase S8, pro-domain"
WBGene00001177	egl-8	B0348.4	V-1A07|V-1A09	ENSG00000101333	PLCB4	6	Ensembl Compara 87-89|Homologene|InParanoid|OMA|OrthoInspector|OrthoMCL	SM00148|SM00149|SM00239	IPR000008 "C2 domain"|IPR000909 "Phosphatidylinositol-specific phospholipase C, X domain"|IPR001192 "Phosphoinositide phospholipase C family"|IPR001711 "Phospholipase C, phosphatidylinositol-specific, Y domain"|IPR009535 "Phospholipase C-beta, conserved site"|IPR011992 "EF-hand domain pair"|IPR011993 "PH domain-like"|IPR015359 "Phosphoinositide-specific phospholipase C, EF-hand-like domain"|IPR01…	Auriculocondylar syndrome 2, 614669
WBGene00001179	egl-10	F28C1.2	V-14A04	ENSG00000182732	RGS6	6	Ensembl Compara 87-89|Homologene|InParanoid|OMA|OrthoInspector|OrthoMCL	SM00049|SM00224|SM00315|SM01224	IPR000591 "DEP domain"|IPR011991 "Winged helix-turn-helix DNA-binding domain"|IPR015898 "G-protein gamma-like domain"|IPR016137 "RGS domain"|IPR024066 "RGS, subdomain 1"
WBGene00001187	egl-19	C48A7.1	IV-3P03	ENSG00000157388	CACNA1D	6	Ensembl Compara 87-89|Homologene|InParanoid|OMA|OrthoInspector|OrthoMCL	SM01062	IPR002077 "Voltage-dependent calcium channel, alpha-1 subunit"|IPR005446 "Voltage-dependent calcium channel, L-type, alpha-1 subunit"|IPR005821 "Ion transport domain"|IPR014873 "Voltage-dependent calcium channel, alpha-1 subunit, IQ domain"|IPR027359 "Voltage-dependent channel, four helix bundle domain"|IPR031649 "Voltage-dependent L-type calcium channel, IQ-associated domain"	Primary aldosteronism, seizures, and neurologic abnormalities, 615474|Sinoatrial node dysfunction and deafness, 614896
WBGene00001188	egl-20	W08D2.1	IV-5G13	ENSG00000002745	WNT16	6	Ensembl Compara 87-89|Homologene|InParanoid|OMA|OrthoInspector|OrthoMCL	SM00097	IPR005817 "Wnt"
WBGene00001189	egl-21	F01D4.4	IV-9A06	ENSG00000109472	CPE	6	Ensembl Compara 87-89|Homologene|InParanoid|OMA|OrthoInspector|OrthoMCL	SM00631	IPR000834 "Peptidase M14, carboxypeptidase A"|IPR008969 "Carboxypeptidase-like, regulatory domain"|IPR014766 "Carboxypeptidase, regulatory domain"
WBGene00001196	egl-30	M01D7.7	I-10A02|I-1A22	ENSG00000088256	GNA11	6	Ensembl Compara 87-89|Homologene|InParanoid|OMA|OrthoInspector|OrthoMCL	SM00275	IPR000654 "G-protein alpha subunit, group Q"|IPR001019 "Guanine nucleotide binding protein (G-protein), alpha subunit"|IPR011025 "G protein alpha subunit, helical insertion"|IPR027417 "P-loop containing nucleoside triphosphate hydrolase"	Hypocalcemia, autosomal dominant 2, 615361|Hypocalciuric hypercalcemia, type II, 145981
WBGene00001202	egl-36	R07A4.1	X-5O07	ENSG00000129159	KCNC1	6	Ensembl Compara 87-89|Homologene|InParanoid|OMA|OrthoInspector|OrthoMCL	SM00225	IPR000210 "BTB/POZ domain"|IPR003131 "Potassium channel tetramerisation-type BTB domain"|IPR003968 "Potassium channel, voltage dependent, Kv"|IPR003974 "Potassium channel, voltage dependent, Kv3"|IPR005821 "Ion transport domain"|IPR011333 "SKP1/BTB/POZ domain"|IPR027359 "Voltage-dependent channel, four helix bundle domain"|IPR028325 "Voltage-gated potassium channel"	Epilepsy, progressive myoclonic 7, 616187
WBGene00001208	egl-44	F28B12.2	II-4B09	ENSG00000187079	TEAD1	6	Ensembl Compara 87-89|Homologene|InParanoid|OMA|OrthoInspector|OrthoMCL	SM00426	IPR000818 "TEA/ATTS domain"|IPR016361 "Transcriptional enhancer factor, metazoa"	Sveinsson chorioretinal atrophy, 108985
WBGene00001209	egl-45	C27D11.1	III-4I13	ENSG00000107581	EIF3A	6	Ensembl Compara 87-89|Homologene|InParanoid|OMA|OrthoInspector|OrthoMCL	SM00088|SM00753	IPR000717 "Proteasome component (PCI) domain"|IPR027512 "Eukaryotic translation initiation factor 3 subunit A"
WBGene00001227	eif-3.D	R08D7.3	III-4F18|III-8A07	ENSG00000100353	EIF3D	6	Ensembl Compara 87-89|Homologene|InParanoid|OMA|OrthoInspector|OrthoMCL		IPR007783 "Eukaryotic translation initiation factor 3 subunit D"
WBGene00001228	eif-3.E	B0511.10	I-5K02	ENSG00000104408	EIF3E	6	Ensembl Compara 87-89|Homologene|InParanoid|OMA|OrthoInspector|OrthoMCL	SM00088|SM00753|SM01186	IPR000717 "Proteasome component (PCI) domain"|IPR011991 "Winged helix-turn-helix DNA-binding domain"|IPR016650 "Eukaryotic translation initiation factor 3 subunit E"|IPR019010 "Eukaryotic translation initiation factor 3 subunit E, N-terminal"
WBGene00001229	eif-3.F	D2013.7	II-6N03	ENSG00000175390	EIF3F	6	Ensembl Compara 87-89|Homologene|InParanoid|OMA|OrthoInspector|OrthoMCL	SM00232	IPR000555 "JAB1/MPN/MOV34 metalloenzyme domain"|IPR024969 "Rpn11/EIF3F, C-terminal"
WBGene00001230	eif-3.G	F22B5.2	II-6M01	ENSG00000130811	EIF3G	6	Ensembl Compara 87-89|Homologene|InParanoid|OMA|OrthoInspector|OrthoMCL	SM00360	IPR000504 "RNA recognition motif domain"|IPR012677 "Nucleotide-binding alpha-beta plait domain"|IPR017334 "Eukaryotic translation initiation factor 3 subunit G"|IPR024675 "Eukaryotic translation initiation factor 3 subunit G, N-terminal"
WBGene00001231	eif-3.H	C41D11.2	I-1P12	ENSG00000147677	EIF3H	6	Ensembl Compara 87-89|Homologene|InParanoid|OMA|OrthoInspector|OrthoMCL	SM00232	IPR000555 "JAB1/MPN/MOV34 metalloenzyme domain"|IPR027524 "Eukaryotic translation initiation factor 3 subunit H"
WBGene00001232	eif-3.I	Y74C10AR.1	I-7H09	ENSG00000084623	EIF3I	6	Ensembl Compara 87-89|Homologene|InParanoid|OMA|OrthoInspector|OrthoMCL	SM00320	IPR001680 "WD40 repeat"|IPR015943 "WD40/YVTN repeat-like-containing domain"|IPR017986 "WD40-repeat-containing domain"
WBGene00001233	eif-3.K	T16G1.11	V-14O23	ENSG00000178982	EIF3K	6	Ensembl Compara 87-89|Homologene|InParanoid|OMA|OrthoInspector|OrthoMCL		IPR009374 "Eukaryotic translation initiation factor 3 subunit K"|IPR011991 "Winged helix-turn-helix DNA-binding domain"|IPR016020 "Translation initiation factor 3, subunit 12, N-terminal, eukaryotic"|IPR016024 "Armadillo-type fold"|IPR033464 "CSN8/PSMD8/EIF3K"
WBGene00001234	eif-6	C47B2.5	I-6H21	ENSG00000242372	EIF6	6	Ensembl Compara 87-89|Homologene|InParanoid|OMA|OrthoInspector|OrthoMCL	SM00654	IPR002769 "Translation initiation factor IF6"
WBGene00001236	elc-1	Y82E9BR.15	III-6N10	ENSG00000154582	ELOC	6	Ensembl Compara 87-89|Homologene|InParanoid|OMA|OrthoInspector|OrthoMCL	SM00512	IPR001232 "S-phase kinase-associated protein 1-like"|IPR011333 "SKP1/BTB/POZ domain"|IPR016073 "SKP1 component, POZ domain"
WBGene00001248	elp-1	F38A6.2	V-13O03	ENSG00000125746	EML2	6	Ensembl Compara 87-89|Homologene|InParanoid|OMA|OrthoInspector|OrthoMCL	SM00320	IPR001680 "WD40 repeat"|IPR005108 "HELP"|IPR011047 "Quinoprotein alcohol dehydrogenase-like superfamily"|IPR015943 "WD40/YVTN repeat-like-containing domain"
WBGene00001258	emb-4	Y80D3A.2	V-12E02|V-12E04|V-12E08|V-12E12|V-12E14|V-12E16	ENSG00000021776	AQR	6	Ensembl Compara 87-89|Homologene|InParanoid|OMA|OrthoInspector|OrthoMCL		IPR026300 "CWF11 family"|IPR027417 "P-loop containing nucleoside triphosphate hydrolase"|IPR032174 "Intron-binding protein aquarius, N-terminal"|IPR032464 "Intron-binding protein aquarius"
WBGene00001259	emb-5	T04A8.14	III-2K08|III-8A08	ENSG00000109111	SUPT6H	6	Ensembl Compara 87-89|Homologene|InParanoid|OMA|OrthoInspector|OrthoMCL	SM00252|SM00316|SM00732	IPR000980 "SH2 domain"|IPR003029 "S1 domain"|IPR006641 "YqgF/RNase H-like domain"|IPR010994 "RuvA domain 2-like"|IPR012337 "Ribonuclease H-like domain"|IPR012340 "Nucleic acid-binding, OB-fold"|IPR017072 "Transcription elongation factor Spt6"|IPR022967 "RNA-binding domain, S1"|IPR023097 "Tex RuvX-like domain"|IPR023323 "Tex-like domain"|IPR027999 "Death-like domain of Spt6"|IPR028083 "Spt6 acidic…
WBGene00001303	emo-1	F32D8.6		ENSG00000132432	SEC61G	6	Ensembl Compara 87-89|Homologene|InParanoid|OMA|OrthoInspector|OrthoMCL		IPR001901 "Protein translocase complex, SecE/Sec61-gamma subunit"|IPR008158 "Protein translocase SEC61 complex, gamma subunit"|IPR023391 "Protein translocase SecE domain"
WBGene00001328	epi-1	K08C7.3	IV-5J23	ENSG00000130702	LAMA5	6	Ensembl Compara 87-89|Homologene|InParanoid|OMA|OrthoInspector|OrthoMCL	SM00136|SM00180|SM00181|SM00281|SM00282	IPR000034 "Laminin IV"|IPR000742 "EGF-like domain"|IPR001791 "Laminin G domain"|IPR002049 "Laminin EGF domain"|IPR008211 "Laminin, N-terminal"|IPR008979 "Galactose-binding domain-like"|IPR010307 "Laminin domain II"|IPR013320 "Concanavalin A-like lectin/glucanase domain"
WBGene00001331	erd-2	F09B9.3	X-5A11	ENSG00000136240	KDELR2	6	Ensembl Compara 87-89|Homologene|InParanoid|OMA|OrthoInspector|OrthoMCL		IPR000133 "ER lumen protein retaining receptor"
WBGene00001333	erm-1	C01G8.5	I-2I14	ENSG00000147065	MSN	6	Ensembl Compara 87-89|Homologene|InParanoid|OMA|OrthoInspector|OrthoMCL	SM00295|SM01196	IPR000798 "Ezrin/radixin/moesin-like"|IPR008954 "Moesin tail domain"|IPR011174 "Ezrin/radixin/moesin"|IPR011259 "Ezrin/radixin/moesin, C-terminal"|IPR011993 "PH domain-like"|IPR014352 "FERM/acyl-CoA-binding protein, 3-helical bundle"|IPR018979 "FERM, N-terminal"|IPR018980 "FERM, C-terminal PH-like domain"|IPR019748 "FERM central domain"|IPR019749 "Band 4.1 domain"|IPR029071 "Ubiquitin-related dom…	Immunodeficiency 50, 300988
WBGene00001334	ero-1	Y105E8B.8	I-9M07	ENSG00000086619	ERO1B	6	Ensembl Compara 87-89|Homologene|InParanoid|OMA|OrthoInspector|OrthoMCL		IPR007266 "Endoplasmic reticulum oxidoreductin 1"
WBGene00001335	erp-1	F35A5.8	X-2M14	ENSG00000148341	SH3GLB2	6	Ensembl Compara 87-89|Homologene|InParanoid|OMA|OrthoInspector|OrthoMCL	SM00326|SM00721	IPR001452 "SH3 domain"|IPR004148 "BAR domain"|IPR027267 "Arfaptin homology (AH) domain/BAR domain"
WBGene00001352	evl-14	H38K22.1	III-2K11	ENSG00000083642	PDS5B	6	Ensembl Compara 87-89|Homologene|InParanoid|OMA|OrthoInspector|OrthoMCL		IPR011989 "Armadillo-like helical"|IPR016024 "Armadillo-type fold"
WBGene00001358	evl-20	F22B5.1	II-6K23	ENSG00000213465	ARL2	6	Ensembl Compara 87-89|Homologene|InParanoid|OMA|OrthoInspector|OrthoMCL	SM00175|SM00177|SM00178	IPR005225 "Small GTP-binding protein domain"|IPR006689 "Small GTPase superfamily, ARF/SAR type"|IPR027417 "P-loop containing nucleoside triphosphate hydrolase"
WBGene00001377	eya-1	C49A1.4		ENSG00000104313	EYA1	6	Ensembl Compara 87-89|Homologene|InParanoid|OMA|OrthoInspector|OrthoMCL		IPR028472 "Eyes absent family"	Anterior segment anomalies with or without cataract, 602588|Branchiootic syndrome 1, 602588|Branchiootorenal syndrome 1, with or without cataracts, 113650|Otofaciocervical syndrome, 166780
WBGene00001403	fbl-1	F56H11.1	IV-4N18|IV-4P14	ENSG00000077942	FBLN1	6	Ensembl Compara 87-89|Homologene|InParanoid|OMA|OrthoInspector|OrthoMCL	SM00104|SM00179|SM00181	IPR000742 "EGF-like domain"|IPR001881 "EGF-like calcium-binding domain"|IPR009030 "Growth factor receptor cysteine-rich domain"|IPR017048 "Fibulin-1"|IPR026823 "Complement Clr-like EGF domain"	Synpolydactyly, 3/3'4, associated with metacarpal and metatarsal synostoses, 608180
WBGene00001404	fbp-1	K07A3.1	I-1G06	ENSG00000130957	FBP2	6	Ensembl Compara 87-89|Homologene|InParanoid|OMA|OrthoInspector|OrthoMCL		IPR000146 "Fructose-1,6-bisphosphatase class 1"|IPR028343 "Fructose-1,6-bisphosphatase"|IPR033391 "Fructose-1-6-bisphosphatase class I, N-terminal"
WBGene00001405	fce-1	C04F12.10	I-4H24	ENSG00000084073	ZMPSTE24	6	Ensembl Compara 87-89|Homologene|InParanoid|OMA|OrthoInspector|OrthoMCL		IPR001915 "Peptidase M48"|IPR027057 "CAAX prenyl protease 1"|IPR032456 "CAAX prenyl protease 1, N-terminal"	Mandibuloacral dysplasia with type B lipodystrophy, 608612|Restrictive dermopathy, lethal, 275210
WBGene00001406	fce-2	F48F5.5		ENSG00000173653	RCE1	6	Ensembl Compara 87-89|Homologene|InParanoid|OMA|OrthoInspector|OrthoMCL		IPR003675 "CAAX amino terminal protease"
WBGene00001414	fer-1	F43G9.6	I-4A24	ENSG00000135636	DYSF	6	Ensembl Compara 87-89|Homologene|InParanoid|OMA|OrthoInspector|OrthoMCL	SM00239|SM00693|SM00694|SM01200|SM01201|SM01202	IPR000008 "C2 domain"|IPR006614 "Peroxin/Ferlin domain"|IPR012560 "Ferlin A-domain"|IPR012561 "Ferlin B-domain"|IPR032362 "Ferlin, C-terminal domain"	Miyoshi muscular dystrophy 1, 254130|Muscular dystrophy, limb-girdle, type 2B, 253601|Myopathy, distal, with anterior tibial onset, 606768
WBGene00001426	fkb-1	F36H1.1	IV-5H18	ENSG00000173486	FKBP2	6	Ensembl Compara 87-89|Homologene|InParanoid|OMA|OrthoInspector|OrthoMCL		IPR001179 "FKBP-type peptidyl-prolyl cis-trans isomerase domain"|IPR023566 "Peptidyl-prolyl cis-trans isomerase, FKBP-type"
WBGene00001431	fkb-6	F31D4.3	V-13A14	ENSG00000004478	FKBP4	6	Ensembl Compara 87-89|Homologene|InParanoid|OMA|OrthoInspector|OrthoMCL	SM00028	IPR001179 "FKBP-type peptidyl-prolyl cis-trans isomerase domain"|IPR011990 "Tetratricopeptide-like helical domain"|IPR019734 "Tetratricopeptide repeat"|IPR023566 "Peptidyl-prolyl cis-trans isomerase, FKBP-type"
WBGene00001443	fli-1	B0523.5	III-4L03	ENSG00000177731	FLII	6	Ensembl Compara 87-89|Homologene|InParanoid|OMA|OrthoInspector|OrthoMCL	SM00262|SM00364|SM00365|SM00369	IPR001611 "Leucine-rich repeat"|IPR003591 "Leucine-rich repeat, typical subtype"|IPR007122 "Villin/Gelsolin"|IPR007123 "Gelsolin-like domain"|IPR029006 "ADF-H/Gelsolin-like domain"|IPR029919 "Protein flightless-1"|IPR032675 "Leucine-rich repeat domain, L domain-like"
WBGene00001475	fmi-1	F15B9.7	V-8N09	ENSG00000075275	CELSR1	6	Ensembl Compara 87-89|Homologene|InParanoid|OMA|OrthoInspector|OrthoMCL	SM00008|SM00112|SM00179|SM00180|SM00181|SM00282|SM00303	IPR000203 "GPS motif"|IPR000742 "EGF-like domain"|IPR000832 "GPCR, family 2, secretin-like"|IPR001791 "Laminin G domain"|IPR001879 "GPCR, family 2, extracellular hormone receptor domain"|IPR001881 "EGF-like calcium-binding domain"|IPR002126 "Cadherin"|IPR013320 "Concanavalin A-like lectin/glucanase domain"|IPR015919 "Cadherin-like"
WBGene00001478	fmo-3	Y39A1A.19	III-8G15	ENSG00000131781	FMO5	6	Ensembl Compara 87-89|Homologene|InParanoid|OMA|OrthoInspector|OrthoMCL		IPR000960 "Flavin monooxygenase FMO"|IPR002257 "Flavin monooxygenase (FMO) 5"|IPR012143 "Dimethylaniline monooxygenase, N-oxide-forming"|IPR020946 "Flavin monooxygenase-like"|IPR023753 "FAD/NAD(P)-binding domain"
WBGene00001480	fmo-5	H24K24.5	V-1F05	ENSG00000131781	FMO5	6	Ensembl Compara 87-89|Homologene|InParanoid|OMA|OrthoInspector|OrthoMCL		IPR000960 "Flavin monooxygenase FMO"|IPR002257 "Flavin monooxygenase (FMO) 5"|IPR012143 "Dimethylaniline monooxygenase, N-oxide-forming"|IPR020946 "Flavin monooxygenase-like"|IPR023753 "FAD/NAD(P)-binding domain"
WBGene00001485	fre-1	Y113G7A.8	V-16B09	ENSG00000188566	NDOR1	6	Ensembl Compara 87-89|Homologene|InParanoid|OMA|OrthoInspector|OrthoMCL		IPR001094 "Flavodoxin-like"|IPR001433 "Oxidoreductase FAD/NAD(P)-binding"|IPR001709 "Flavoprotein pyridine nucleotide cytochrome reductase"|IPR003097 "FAD-binding, type 1"|IPR008254 "Flavodoxin/nitric oxide synthase"|IPR017938 "Riboflavin synthase-like beta-barrel"|IPR023173 "NADPH-cytochrome p450 reductase, FAD-binding, alpha-helical domain-3"|IPR029039 "Flavoprotein-like domain"
WBGene00001497	fars-1	T08B2.9	I-2P10	ENSG00000179115	FARSA	6	Ensembl Compara 87-89|Homologene|InParanoid|OMA|OrthoInspector|OrthoMCL		IPR002319 "Phenylalanyl-tRNA synthetase"|IPR004529 "Phenylalanyl-tRNA synthetase, class IIc, alpha subunit"|IPR010987 "Glutathione S-transferase, C-terminal-like"|IPR011991 "Winged helix-turn-helix DNA-binding domain"
WBGene00001499	fsn-1	C26E6.5	III-2H01	ENSG00000174013	FBXO45	6	Ensembl Compara 87-89|Homologene|InParanoid|OMA|OrthoInspector|OrthoMCL	SM00256|SM00449	IPR001810 "F-box domain"|IPR003877 "SPRY domain"|IPR013320 "Concanavalin A-like lectin/glucanase domain"
WBGene00001502	ftt-2	F52D10.3	X-5F07	ENSG00000164924	YWHAZ	6	Ensembl Compara 87-89|Homologene|InParanoid|OMA|OrthoInspector|OrthoMCL	SM00101	IPR000308 "14-3-3 protein"|IPR023410 "14-3-3 domain"
WBGene00001503	fum-1	H14A12.2	III-3P22	ENSG00000091483	FH	6	Ensembl Compara 87-89|Homologene|InParanoid|OMA|OrthoInspector|OrthoMCL		IPR000362 "Fumarate lyase family"|IPR005677 "Fumarate hydratase, class II"|IPR008948 "L-Aspartase-like"|IPR018951 "Fumarase C, C-terminal"|IPR022761 "Fumarate lyase, N-terminal"|IPR024083 "Fumarase/histidase, N-terminal"	Fumarase deficiency, 606812|Leiomyomatosis and renal cell cancer, 150800
WBGene00001508	fut-8	C10F3.6		ENSG00000033170	FUT8	6	Ensembl Compara 87-89|Homologene|InParanoid|OMA|OrthoInspector|OrthoMCL	SM00326	IPR001452 "SH3 domain"|IPR015827 "Alpha-(1,6)-fucosyltransferase, eukaryotic type"
WBGene00001509	fzo-1	ZK1248.14	II-10A16|II-4N18	ENSG00000116688	MFN2	6	Ensembl Compara 87-89|Homologene|InParanoid|OMA|OrthoInspector|OrthoMCL		IPR006884 "Fzo/mitofusin HR2 domain"|IPR022812 "Dynamin superfamily"|IPR027091 "Transmembrane GTPase Fzo/Fzo1"|IPR027094 "Mitofusin family"|IPR027417 "P-loop containing nucleoside triphosphate hydrolase"	Charcot-Marie-Tooth disease, axonal, type 2A2A, 609260|Charcot-Marie-Tooth disease, axonal, type 2A2B, 617087|Hereditary motor and sensory neuropathy VIA, 601152
WBGene00001520	gas-1	K09A9.5	X-7K23	ENSG00000158864	NDUFS2	6	Ensembl Compara 87-89|Homologene|InParanoid|OMA|OrthoInspector|OrthoMCL		IPR001135 "NADH-quinone oxidoreductase, subunit D"|IPR022885 "NAD(P)H-quinone oxidoreductase subunit D/H"|IPR029014 "NiFe hydrogenase-like"	Mitochondrial complex I deficiency, 252010
WBGene00006463	nduf-2.2	T26A5.3	III-3M24	ENSG00000158864	NDUFS2	6	Ensembl Compara 87-89|Homologene|InParanoid|OMA|OrthoInspector|OrthoMCL		IPR001135 "NADH-quinone oxidoreductase, subunit D"|IPR022885 "NAD(P)H-quinone oxidoreductase subunit D/H"|IPR029014 "NiFe hydrogenase-like"	Mitochondrial complex I deficiency, 252010
WBGene00001522	gbh-1	D2089.5	II-10J17	ENSG00000129151	BBOX1	6	Ensembl Compara 87-89|Homologene|InParanoid|OMA|OrthoInspector|OrthoMCL		IPR003819 "TauD/TfdA-like domain"|IPR012775 "Gamma-butyrobetaine hydroxylase"
WBGene00001523	gbh-2	M05D6.7	II-6O07	ENSG00000185973	TMLHE	6	Ensembl Compara 87-89|Homologene|InParanoid|OMA|OrthoInspector|OrthoMCL		IPR003819 "TauD/TfdA-like domain"|IPR010376 "Domain of unknown function DUF971"|IPR012776 "Trimethyllysine dioxygenase"	Autism, susceptibility to, X-linked 6, 300872
WBGene00001527	gcs-1	F37B12.2	II-6D11	ENSG00000001084	GCLC	6	Ensembl Compara 87-89|Homologene|InParanoid|OMA|OrthoInspector|OrthoMCL		IPR004308 "Glutamate-cysteine ligase catalytic subunit"	Hemolytic anemia due to gamma-glutamylcysteine synthetase deficiency, 230450|Myocardial infarction, susceptibility to, 608446
WBGene00001558	gdi-1	Y57G11C.10		ENSG00000203879	GDI1	6	Ensembl Compara 87-89|Homologene|InParanoid|OMA|OrthoInspector|OrthoMCL		IPR000806 "Rab GDI protein"|IPR016040 "NAD(P)-binding domain"|IPR018203 "GDP dissociation inhibitor"|IPR023753 "FAD/NAD(P)-binding domain"	Mental retardation, X-linked 41, 300849
WBGene00001577	gem-4	T12A7.1	IV-9A10	ENSG00000124772	CPNE5	6	Ensembl Compara 87-89|Homologene|InParanoid|OMA|OrthoInspector|OrthoMCL	SM00239|SM00327	IPR000008 "C2 domain"|IPR002035 "von Willebrand factor, type A"|IPR010734 "Copine"
WBGene00012128	nra-1	T28F3.1	IV-8A10|IV-8O19	ENSG00000124772	CPNE5	6	Ensembl Compara 87-89|Homologene|InParanoid|OMA|OrthoInspector|OrthoMCL	SM00239|SM00327	IPR000008 "C2 domain"|IPR002035 "von Willebrand factor, type A"|IPR010734 "Copine"
WBGene00001585	gfl-1	M04B2.3	IV-6K13	ENSG00000127337	YEATS4	6	Ensembl Compara 87-89|Homologene|InParanoid|OMA|OrthoInspector|OrthoMCL		IPR005033 "YEATS"
WBGene00001590		C45G3.3	I-4F21	ENSG00000144182	LIPT1	6	Ensembl Compara 87-89|Homologene|InParanoid|OMA|OrthoInspector|OrthoMCL			Lipoyltransferase 1 deficiency, 616299
WBGene00003774	nmr-1	F07F6.6	II-4K24	ENSG00000176884	GRIN1	6	Ensembl Compara 87-89|Homologene|InParanoid|OMA|OrthoInspector|OrthoMCL	SM00079|SM00918	IPR001320 "Ionotropic glutamate receptor"|IPR001508 "Ionotropic glutamate receptor, metazoa"|IPR001638 "Solute-binding protein family 3/N-terminal domain of MltF"|IPR001828 "Receptor, ligand binding region"|IPR006629 "LPS-induced tumour necrosis factor alpha factor"|IPR028082 "Periplasmic binding protein-like I"	Mental retardation, autosomal dominant 8, 614254
WBGene00001620	glt-1	C12D12.2	X-2C12	ENSG00000110436	SLC1A2	6	Ensembl Compara 87-89|Homologene|InParanoid|OMA|OrthoInspector|OrthoMCL		IPR001991 "Sodium:dicarboxylate symporter"	Epileptic encephalopathy, early infantile, 41, 617105
WBGene00001626	gly-1	F44F4.6	II-7F21	ENSG00000140297	GCNT3	6	Ensembl Compara 87-89|Homologene|InParanoid|OMA|OrthoInspector|OrthoMCL		IPR003406 "Glycosyl transferase, family 14"
WBGene00001640	gly-15	C54C8.11	I-6E22	ENSG00000140297	GCNT3	6	Ensembl Compara 87-89|Homologene|InParanoid|OMA|OrthoInspector|OrthoMCL		IPR003406 "Glycosyl transferase, family 14"
WBGene00001641	gly-16	T15D6.2	I-6A08	ENSG00000140297	GCNT3	6	Ensembl Compara 87-89|Homologene|InParanoid|OMA|OrthoInspector|OrthoMCL		IPR003406 "Glycosyl transferase, family 14"
WBGene00001642	gly-17	T15D6.3	I-6A10	ENSG00000140297	GCNT3	6	Ensembl Compara 87-89|Homologene|InParanoid|OMA|OrthoInspector|OrthoMCL		IPR003406 "Glycosyl transferase, family 14"
WBGene00001643	gly-18	F22D6.11	I-3B11	ENSG00000140297	GCNT3	6	Ensembl Compara 87-89|Homologene|InParanoid|OMA|OrthoInspector|OrthoMCL		IPR003406 "Glycosyl transferase, family 14"
WBGene00001644	gly-19	F22D6.12	I-3B13	ENSG00000140297	GCNT3	6	Ensembl Compara 87-89|Homologene|InParanoid|OMA|OrthoInspector|OrthoMCL		IPR003406 "Glycosyl transferase, family 14"
WBGene00001627	gly-2	C55B7.2	I-3I19	ENSG00000152127	MGAT5	6	Ensembl Compara 87-89|Homologene|InParanoid|OMA|OrthoInspector|OrthoMCL		IPR026116 "Glycosyltransferase family 18"
WBGene00001628	gly-3	ZK688.8	III-4M07	ENSG00000141429	GALNT1	6	Ensembl Compara 87-89|Homologene|InParanoid|OMA|OrthoInspector|OrthoMCL	SM00458	IPR000772 "Ricin B, lectin domain"|IPR001173 "Glycosyltransferase 2-like"|IPR029044 "Nucleotide-diphospho-sugar transferases"
WBGene00001629	gly-4	Y116F11B.12	V-14E03	ENSG00000143641	GALNT2	6	Ensembl Compara 87-89|Homologene|InParanoid|OMA|OrthoInspector|OrthoMCL	SM00458	IPR000772 "Ricin B, lectin domain"|IPR001173 "Glycosyltransferase 2-like"|IPR029044 "Nucleotide-diphospho-sugar transferases"
WBGene00001632	gly-7	Y46H3A.6	V-14E04	ENSG00000109586	GALNT7	6	Ensembl Compara 87-89|Homologene|InParanoid|OMA|OrthoInspector|OrthoMCL	SM00458	IPR000772 "Ricin B, lectin domain"|IPR001173 "Glycosyltransferase 2-like"|IPR027791 "Galactosyltransferase, C-terminal"|IPR029044 "Nucleotide-diphospho-sugar transferases"
WBGene00001635	gly-10	Y45F10D.3	IV-7E16	ENSG00000164574	GALNT10	6	Ensembl Compara 87-89|Homologene|InParanoid|OMA|OrthoInspector|OrthoMCL	SM00458	IPR000772 "Ricin B, lectin domain"|IPR001173 "Glycosyltransferase 2-like"|IPR027791 "Galactosyltransferase, C-terminal"|IPR029044 "Nucleotide-diphospho-sugar transferases"
WBGene00001636	gly-11	Y75B8A.9	III-8A11	ENSG00000178234	GALNT11	6	Ensembl Compara 87-89|Homologene|InParanoid|OMA|OrthoInspector|OrthoMCL	SM00458	IPR000772 "Ricin B, lectin domain"|IPR001173 "Glycosyltransferase 2-like"|IPR027791 "Galactosyltransferase, C-terminal"|IPR029044 "Nucleotide-diphospho-sugar transferases"
WBGene00001638	gly-13	B0416.6	X-4N09	ENSG00000131446	MGAT1	6	Ensembl Compara 87-89|Homologene|InParanoid|OMA|OrthoInspector|OrthoMCL		IPR004139 "Glycosyl transferase, family 13"|IPR029044 "Nucleotide-diphospho-sugar transferases"
WBGene00001639	gly-14	M01F1.1	III-1D18	ENSG00000131446	MGAT1	6	Ensembl Compara 87-89|Homologene|InParanoid|OMA|OrthoInspector|OrthoMCL		IPR004139 "Glycosyl transferase, family 13"|IPR029044 "Nucleotide-diphospho-sugar transferases"
WBGene00001645	gly-20	C03E10.4	V-7N19	ENSG00000168282	MGAT2	6	Ensembl Compara 87-89|Homologene|InParanoid|OMA|OrthoInspector|OrthoMCL		IPR007754 "N-acetylglucosaminyltransferase II"|IPR029044 "Nucleotide-diphospho-sugar transferases"	Congenital disorder of glycosylation, type IIa, 212066
WBGene00001646	gna-1	B0024.12	V-7M07	ENSG00000100522	GNPNAT1	6	Ensembl Compara 87-89|Homologene|InParanoid|OMA|OrthoInspector|OrthoMCL		IPR000182 "GNAT domain"|IPR016181 "Acyl-CoA N-acyltransferase"
WBGene00001648	goa-1	C26C6.2	I-3P15	ENSG00000087258	GNAO1	6	Ensembl Compara 87-89|Homologene|InParanoid|OMA|OrthoInspector|OrthoMCL	SM00275	IPR001019 "Guanine nucleotide binding protein (G-protein), alpha subunit"|IPR001408 "G-protein alpha subunit, group I"|IPR011025 "G protein alpha subunit, helical insertion"|IPR027417 "P-loop containing nucleoside triphosphate hydrolase"	Epileptic encephalopathy, early infantile, 17, 615473|Neurodevelopmental disorder with involuntary movements, 617493
WBGene00001650	gon-1	F25H8.3	IV-5M07	ENSG00000163638	ADAMTS9	6	Ensembl Compara 87-89|Homologene|InParanoid|OMA|OrthoInspector|OrthoMCL	SM00209	IPR000884 "Thrombospondin type-1 (TSP1) repeat"|IPR001590 "Peptidase M12B, ADAM/reprolysin"|IPR010294 "ADAM-TS Spacer 1"|IPR012314 "Peptidase M12B, GON-ADAMTSs"|IPR013273 "Peptidase M12B, ADAM-TS"|IPR024079 "Metallopeptidase, catalytic domain"
WBGene00001660	gop-1	C34E10.3	III-2B10	ENSG00000038532	CLEC16A	6	Ensembl Compara 87-89|Homologene|InParanoid|OMA|OrthoInspector|OrthoMCL		IPR016024 "Armadillo-type fold"|IPR019155 "Uncharacterised protein family FPL"
WBGene00001661	gop-2	C34E10.2	III-2B08	ENSG00000198522	GPN1	6	Ensembl Compara 87-89|Homologene|InParanoid|OMA|OrthoInspector|OrthoMCL	SM00382	IPR004130 "GPN-loop GTPase"|IPR027417 "P-loop containing nucleoside triphosphate hydrolase"|IPR030230 "GPN-loop GTPase 1"
WBGene00001662	gop-3	C34E10.1	III-2B06|III-8O13	ENSG00000100347	SAMM50	6	Ensembl Compara 87-89|Homologene|InParanoid|OMA|OrthoInspector|OrthoMCL		IPR000184 "Bacterial surface antigen (D15)"
WBGene00001674	gpa-12	F18G5.3	X-4L15	ENSG00000146535	GNA12	6	Ensembl Compara 87-89|Homologene|InParanoid|OMA|OrthoInspector|OrthoMCL	SM00275	IPR000469 "G-protein alpha subunit, group 12/13"|IPR001019 "Guanine nucleotide binding protein (G-protein), alpha subunit"|IPR011025 "G protein alpha subunit, helical insertion"|IPR027417 "P-loop containing nucleoside triphosphate hydrolase"
WBGene00001679	gpb-1	F13D12.7	II-8A05	ENSG00000078369	GNB1	6	Ensembl Compara 87-89|Homologene|InParanoid|OMA|OrthoInspector|OrthoMCL	SM00320	IPR001632 "G-protein, beta subunit"|IPR001680 "WD40 repeat"|IPR015943 "WD40/YVTN repeat-like-containing domain"|IPR016346 "Guanine nucleotide-binding protein, beta subunit"|IPR017986 "WD40-repeat-containing domain"|IPR020472 "G-protein beta WD-40 repeat"	Leukemia, acute lymphoblastic, somatic, 613065|Mental retardation, autosomal dominant 42, 616973
WBGene00001680	gpb-2	F52A8.2	I-9A13	ENSG00000069966	GNB5	6	Ensembl Compara 87-89|Homologene|InParanoid|OMA|OrthoInspector|OrthoMCL	SM00320	IPR001632 "G-protein, beta subunit"|IPR001680 "WD40 repeat"|IPR015943 "WD40/YVTN repeat-like-containing domain"|IPR016346 "Guanine nucleotide-binding protein, beta subunit"|IPR017986 "WD40-repeat-containing domain"|IPR020472 "G-protein beta WD-40 repeat"	Intellectual developmental disorder with cardiac arrhythmia, 617173|Language delay and ADHD/cognitive impairment with or without cardiac arrhythmia, 617182
WBGene00001687	gpn-1	F59D12.4	X-7M17	ENSG00000076716	GPC4	6	Ensembl Compara 87-89|Homologene|InParanoid|OMA|OrthoInspector|OrthoMCL		IPR001863 "Glypican"
WBGene00001708	grk-1	F19C6.1	X-4N08	ENSG00000198873	GRK5	6	Ensembl Compara 87-89|Homologene|InParanoid|OMA|OrthoInspector|OrthoMCL	SM00133|SM00220|SM00315	IPR000239 "GPCR kinase"|IPR000719 "Protein kinase domain"|IPR000961 "AGC-kinase, C-terminal"|IPR011009 "Protein kinase-like domain"|IPR016137 "RGS domain"
WBGene00001709	grk-2	W02B3.2	III-1O01	ENSG00000100077	GRK3	6	Ensembl Compara 87-89|Homologene|InParanoid|OMA|OrthoInspector|OrthoMCL	SM00133|SM00220|SM00233|SM00315	IPR000239 "GPCR kinase"|IPR000719 "Protein kinase domain"|IPR000961 "AGC-kinase, C-terminal"|IPR001849 "Pleckstrin homology domain"|IPR011009 "Protein kinase-like domain"|IPR011993 "PH domain-like"|IPR016137 "RGS domain"
WBGene00001740	gro-1	ZC395.6	III-2D08	ENSG00000043514	TRIT1	6	Ensembl Compara 87-89|Homologene|InParanoid|OMA|OrthoInspector|OrthoMCL	SM00451	IPR018022 "tRNA dimethylallyltransferase"|IPR027417 "P-loop containing nucleoside triphosphate hydrolase"
WBGene00001743	grp-1	K06H7.4	III-4C16	ENSG00000008256	CYTH3	6	Ensembl Compara 87-89|Homologene|InParanoid|OMA|OrthoInspector|OrthoMCL	SM00222|SM00233	IPR000904 "Sec7 domain"|IPR001849 "Pleckstrin homology domain"|IPR011993 "PH domain-like"|IPR023394 "Sec7 domain, alpha orthogonal bundle"
WBGene00001744	gars-1	T10F2.1	III-2N17|III-8A12	ENSG00000106105	GARS	6	Ensembl Compara 87-89|Homologene|InParanoid|OMA|OrthoInspector|OrthoMCL	SM00991	IPR000738 "WHEP-TRS domain"|IPR002314 "Aminoacyl-tRNA synthetase, class II (G/ P/ S/T)"|IPR002315 "Glycyl-tRNA synthetase"|IPR004154 "Anticodon-binding"|IPR009068 "S15/NS1, RNA-binding"|IPR027031 "Glycyl-tRNA synthetase/DNA polymerase subunit gamma-2"	Charcot-Marie-Tooth disease, type 2D, 601472|Neuropathy, distal hereditary motor, type VA, 600794
WBGene00001746	gsk-3	Y18D10A.5	I-6D13	ENSG00000082701	GSK3B	6	Ensembl Compara 87-89|Homologene|InParanoid|OMA|OrthoInspector|OrthoMCL	SM00220	IPR000719 "Protein kinase domain"|IPR011009 "Protein kinase-like domain"
WBGene00001747	gsp-1	F29F11.6		ENSG00000213639	PPP1CB	6	Ensembl Compara 87-89|Homologene|InParanoid|OMA|OrthoInspector|OrthoMCL	SM00156	IPR004843 "Calcineurin-like phosphoesterase domain, apaH type"|IPR006186 "Serine/threonine-specific protein phosphatase/bis(5-nucleosyl)-tetraphosphatase"|IPR029052 "Metallo-dependent phosphatase-like"|IPR031675 "Serine-threonine protein phosphatase, N-terminal"	Noonan syndrome-like disorder with loose anagen hair 2, 617506
WBGene00001748	gsp-2	F56C9.1	III-8I02	ENSG00000172531	PPP1CA	6	Ensembl Compara 87-89|Homologene|InParanoid|OMA|OrthoInspector|OrthoMCL	SM00156	IPR004843 "Calcineurin-like phosphoesterase domain, apaH type"|IPR006186 "Serine/threonine-specific protein phosphatase/bis(5-nucleosyl)-tetraphosphatase"|IPR029052 "Metallo-dependent phosphatase-like"|IPR031675 "Serine-threonine protein phosphatase, N-terminal"
WBGene00001759	gst-11	R11G1.3	X-8I10	ENSG00000163106	HPGDS	6	Ensembl Compara 87-89|Homologene|InParanoid|OMA|OrthoInspector|OrthoMCL		IPR004045 "Glutathione S-transferase, N-terminal"|IPR004046 "Glutathione S-transferase, C-terminal"|IPR010987 "Glutathione S-transferase, C-terminal-like"|IPR012336 "Thioredoxin-like fold"
WBGene00001790	gst-42	D1053.1	X-5J07	ENSG00000100577	GSTZ1	6	Ensembl Compara 87-89|Homologene|InParanoid|OMA|OrthoInspector|OrthoMCL		IPR004045 "Glutathione S-transferase, N-terminal"|IPR004046 "Glutathione S-transferase, C-terminal"|IPR005955 "Maleylacetoacetate isomerase"|IPR010987 "Glutathione S-transferase, C-terminal-like"|IPR012336 "Thioredoxin-like fold"	Maleylacetoacetate isomerase deficiency, 617596
WBGene00021817		Y53G8B.1		ENSG00000100577	GSTZ1	6	Ensembl Compara 87-89|Homologene|InParanoid|OMA|OrthoInspector|OrthoMCL		IPR004045 "Glutathione S-transferase, N-terminal"|IPR004046 "Glutathione S-transferase, C-terminal"|IPR005955 "Maleylacetoacetate isomerase"|IPR010987 "Glutathione S-transferase, C-terminal-like"|IPR012336 "Thioredoxin-like fold"	Maleylacetoacetate isomerase deficiency, 617596
WBGene00001792	gst-44	F13A7.10	V-10P14	ENSG00000148834	GSTO1	6	Ensembl Compara 87-89|Homologene|InParanoid|OMA|OrthoInspector|OrthoMCL		IPR004045 "Glutathione S-transferase, N-terminal"|IPR004046 "Glutathione S-transferase, C-terminal"|IPR005442 "Glutathione S-transferase, omega-class"|IPR010987 "Glutathione S-transferase, C-terminal-like"|IPR012336 "Thioredoxin-like fold"
WBGene00015337	gsto-2	C02D5.3	III-4F21	ENSG00000148834	GSTO1	6	Ensembl Compara 87-89|Homologene|InParanoid|OMA|OrthoInspector|OrthoMCL		IPR004045 "Glutathione S-transferase, N-terminal"|IPR004046 "Glutathione S-transferase, C-terminal"|IPR005442 "Glutathione S-transferase, omega-class"|IPR010987 "Glutathione S-transferase, C-terminal-like"|IPR012336 "Thioredoxin-like fold"
WBGene00001793	gsy-1	Y46G5A.31	II-9L09|II-9L13	ENSG00000104812	GYS1	6	Ensembl Compara 87-89|Homologene|InParanoid|OMA|OrthoInspector|OrthoMCL		IPR008631 "Glycogen synthase"	Glycogen storage disease 0, muscle, 611556
WBGene00001819	haf-9	ZK484.2	I-2H20	ENSG00000150967	ABCB9	6	Ensembl Compara 87-89|Homologene|InParanoid|OMA|OrthoInspector|OrthoMCL	SM00382	IPR003439 "ABC transporter-like"|IPR003593 "AAA+ ATPase domain"|IPR011527 "ABC transporter type 1, transmembrane domain"|IPR013305 "ABC transporter Tap-like"|IPR027417 "P-loop containing nucleoside triphosphate hydrolase"
WBGene00001815	hmt-1	W09D6.6	III-8G16	ENSG00000115657	ABCB6	6	Ensembl Compara 87-89|Homologene|InParanoid|OMA|OrthoInspector|OrthoMCL	SM00382	IPR003439 "ABC transporter-like"|IPR003593 "AAA+ ATPase domain"|IPR011527 "ABC transporter type 1, transmembrane domain"|IPR027417 "P-loop containing nucleoside triphosphate hydrolase"	Blood group, Langereis system, 111600|Dyschromatosis universalis hereditaria 3, 615402|Microphthalmia, isolated, with coloboma 7, 614497|Pseudohyperkalemia, familial, 2, due to red cell leak, 609153
WBGene00001816	haf-6	Y48G8AL.11	I-9N03	ENSG00000197150	ABCB8	6	Ensembl Compara 87-89|Homologene|InParanoid|OMA|OrthoInspector|OrthoMCL	SM00382	IPR003439 "ABC transporter-like"|IPR003593 "AAA+ ATPase domain"|IPR011527 "ABC transporter type 1, transmembrane domain"|IPR027417 "P-loop containing nucleoside triphosphate hydrolase"
WBGene00001823	hap-1	ZC395.7	III-8L21	ENSG00000125877	ITPA	6	Ensembl Compara 87-89|Homologene|InParanoid|OMA|OrthoInspector|OrthoMCL		IPR002637 "Ham1-like protein"|IPR029001 "Inosine triphosphate pyrophosphatase-like"	Epileptic encephalopathy, early infantile, 35, 616647|Inosine triphosphatase deficiency, 613850
WBGene00001840	hel-1	C26D10.2	II-6I01	ENSG00000123136	DDX39A	6	Ensembl Compara 87-89|Homologene|InParanoid|OMA|OrthoInspector|OrthoMCL	SM00487|SM00490	IPR001650 "Helicase, C-terminal"|IPR011545 "DEAD/DEAH box helicase domain"|IPR014001 "Helicase superfamily 1/2, ATP-binding domain"|IPR027417 "P-loop containing nucleoside triphosphate hydrolase"
WBGene00001843	hgo-1	W06D4.1	I-4B17	ENSG00000113924	HGD	6	Ensembl Compara 87-89|Homologene|InParanoid|OMA|OrthoInspector|OrthoMCL		IPR005708 "Homogentisate 1,2-dioxygenase"|IPR011051 "RmlC-like cupin domain"|IPR014710 "RmlC-like jelly roll fold"	Alkaptonuria, 203500
WBGene00001844	hid-1	K02E10.2	X-1L04	ENSG00000167861	HID1	6	Ensembl Compara 87-89|Homologene|InParanoid|OMA|OrthoInspector|OrthoMCL		IPR026705 "Hid-1/Ecm30"
WBGene00001860	him-1	F28B3.7	I-2O07	ENSG00000072501	SMC1A	6	Ensembl Compara 87-89|Homologene|InParanoid|OMA|OrthoInspector|OrthoMCL	SM00968	IPR003395 "RecF/RecN/SMC, N-terminal"|IPR010935 "SMCs flexible hinge"|IPR024704 "Structural maintenance of chromosomes protein"|IPR027417 "P-loop containing nucleoside triphosphate hydrolase"|IPR029683 "Structural maintenance of chromosomes protein 1A, metazoan"	Cornelia de Lange syndrome 2, 300590
WBGene00006787	unc-52	ZC101.2	II-9A20	ENSG00000142798	HSPG2	6	Ensembl Compara 87-89|Homologene|InParanoid|OMA|OrthoInspector|OrthoMCL	SM00179|SM00180|SM00181|SM00192|SM00200|SM00281|SM00282|SM00406|SM00408|SM00409	IPR000034 "Laminin IV"|IPR000742 "EGF-like domain"|IPR001791 "Laminin G domain"|IPR001881 "EGF-like calcium-binding domain"|IPR002049 "Laminin EGF domain"|IPR002172 "Low-density lipoprotein (LDL) receptor class A repeat"|IPR003598 "Immunoglobulin subtype 2"|IPR003599 "Immunoglobulin subtype"|IPR007110 "Immunoglobulin-like domain"|IPR009030 "Growth factor receptor cysteine-rich domain"|IPR013098 "…	Dyssegmental dysplasia, Silverman-Handmaker type, 224410|Schwartz-Jampel syndrome, type 1, 255800
WBGene00001863	him-4	F15G9.4	X-4F24|X-8I18	ENSG00000143341	HMCN1	6	Ensembl Compara 87-89|Homologene|InParanoid|OMA|OrthoInspector|OrthoMCL	SM00179|SM00181|SM00209|SM00406|SM00408|SM00409|SM00682	IPR000742 "EGF-like domain"|IPR001881 "EGF-like calcium-binding domain"|IPR002035 "von Willebrand factor, type A"|IPR003598 "Immunoglobulin subtype 2"|IPR003599 "Immunoglobulin subtype"|IPR007110 "Immunoglobulin-like domain"|IPR009030 "Growth factor receptor cysteine-rich domain"|IPR013098 "Immunoglobulin I-set"|IPR013106 "Immunoglobulin V-set domain"|IPR013783 "Immunoglobulin-like fold"	Macular degeneration, age-related, 1, 603075
WBGene00001872	him-14	ZK1127.11	II-5I04|II-5I24	ENSG00000057468	MSH4	6	Ensembl Compara 87-89|Homologene|InParanoid|OMA|OrthoInspector|OrthoMCL	SM00533|SM00534	IPR000432 "DNA mismatch repair protein MutS, C-terminal"|IPR007696 "DNA mismatch repair protein MutS, core"|IPR007860 "DNA mismatch repair protein MutS, connector domain"|IPR011184 "DNA mismatch repair MutS"|IPR027417 "P-loop containing nucleoside triphosphate hydrolase"
WBGene00001887	his-13	ZK131.7	II-8J20	ENSG00000197153	HIST1H3J	6	Ensembl Compara 87-89|Homologene|InParanoid|OMA|OrthoInspector|OrthoMCL	SM00428	IPR000164 "Histone H3/CENP-A"|IPR007125 "Histone H2A/H2B/H3"|IPR009072 "Histone-fold"
WBGene00001889	his-15	ZK131.9	II-8J16|II-8J24	ENSG00000124635	HIST1H2BJ	6	Ensembl Compara 87-89|Homologene|InParanoid|OMA|OrthoInspector|OrthoMCL	SM00427	IPR000558 "Histone H2B"|IPR007125 "Histone H2A/H2B/H3"|IPR009072 "Histone-fold"
WBGene00001915	his-41	C50F4.5	V-6N07	ENSG00000124635	HIST1H2BJ	6	Ensembl Compara 87-89|Homologene|InParanoid|OMA|OrthoInspector|OrthoMCL	SM00427	IPR000558 "Histone H2B"|IPR007125 "Histone H2A/H2B/H3"|IPR009072 "Histone-fold"
WBGene00001928	his-54	F07B7.11		ENSG00000124635	HIST1H2BJ	6	Ensembl Compara 87-89|Homologene|InParanoid|OMA|OrthoInspector|OrthoMCL	SM00427	IPR000558 "Histone H2B"|IPR007125 "Histone H2A/H2B/H3"|IPR009072 "Histone-fold"
WBGene00001940	his-66	H02I12.6	IV-6G19	ENSG00000124635	HIST1H2BJ	6	Ensembl Compara 87-89|Homologene|InParanoid|OMA|OrthoInspector|OrthoMCL	SM00427	IPR000558 "Histone H2B"|IPR007125 "Histone H2A/H2B/H3"|IPR009072 "Histone-fold"
WBGene00001972	hmg-1.2	F47D12.4	III-3G18	ENSG00000164104	HMGB2	6	Ensembl Compara 87-89|Homologene|InParanoid|OMA|OrthoInspector|OrthoMCL	SM00398	IPR009071 "High mobility group box domain"
WBGene00001974	hmg-4	T20B12.8	III-3P10	ENSG00000149136	SSRP1	6	Ensembl Compara 87-89|Homologene|InParanoid|OMA|OrthoInspector|OrthoMCL	SM00398|SM01287	IPR000969 "Structure-specific recognition protein"|IPR009071 "High mobility group box domain"|IPR011993 "PH domain-like"|IPR013719 "Domain of unknown function DUF1747"|IPR024954 "SSRP1 domain"
WBGene00001978	hmp-1	R13H4.4		ENSG00000066032	CTNNA2	6	Ensembl Compara 87-89|Homologene|InParanoid|OMA|OrthoInspector|OrthoMCL		IPR001033 "Alpha-catenin"|IPR006077 "Vinculin/alpha-catenin"
WBGene00001993	hpd-1	T21C12.2	III-5J23	ENSG00000158104	HPD	6	Ensembl Compara 87-89|Homologene|InParanoid|OMA|OrthoInspector|OrthoMCL		IPR004360 "Glyoxalase/fosfomycin resistance/dioxygenase domain"|IPR005956 "4-hydroxyphenylpyruvate dioxygenase"|IPR029068 "Glyoxalase/Bleomycin resistance protein/Dihydroxybiphenyl dioxygenase"	Hawkinsinuria, 140350|Tyrosinemia, type III, 276710
WBGene00002001	hars-1	T11G6.1	IV-5P23	ENSG00000170445	HARS	6	Ensembl Compara 87-89|Homologene|InParanoid|OMA|OrthoInspector|OrthoMCL	SM00991	IPR004154 "Anticodon-binding"|IPR004516 "Histidine-tRNA ligase/ATP phosphoribosyltransferase regulatory subunit"|IPR009068 "S15/NS1, RNA-binding"|IPR015807 "Histidine-tRNA ligase"	Charcot-Marie-Tooth disease, axonal, type 2W, 616625|Usher syndrome type 3B, 614504
WBGene00002003	hse-5	B0285.5	III-2M05	ENSG00000138604	GLCE	6	Ensembl Compara 87-89|Homologene|InParanoid|OMA|OrthoInspector|OrthoMCL		IPR008930 "Terpenoid cyclases/protein prenyltransferase alpha-alpha toroid"|IPR010598 "D-glucuronyl C5-epimerase"
WBGene00002007	hsp-3	C15H9.6	X-3G06	ENSG00000044574	HSPA5	6	Ensembl Compara 87-89|Homologene|InParanoid|OMA|OrthoInspector|OrthoMCL		IPR013126 "Heat shock protein 70 family"|IPR029047 "Heat shock protein 70kD, peptide-binding domain"|IPR029048 "Heat shock protein 70kD, C-terminal domain"
WBGene00002008	hsp-4	F43E2.8	II-10A18|II-5H21	ENSG00000044574	HSPA5	6	Ensembl Compara 87-89|Homologene|InParanoid|OMA|OrthoInspector|OrthoMCL		IPR013126 "Heat shock protein 70 family"|IPR029047 "Heat shock protein 70kD, peptide-binding domain"|IPR029048 "Heat shock protein 70kD, C-terminal domain"
WBGene00002010	hsp-6	C37H5.8	V-14E09|V-3J20	ENSG00000113013	HSPA9	6	Ensembl Compara 87-89|Homologene|InParanoid|OMA|OrthoInspector|OrthoMCL		IPR012725 "Chaperone DnaK"|IPR013126 "Heat shock protein 70 family"|IPR029047 "Heat shock protein 70kD, peptide-binding domain"|IPR029048 "Heat shock protein 70kD, C-terminal domain"	Anemia, sideroblastic, 4, 182170|Even-plus syndrome, 616854
WBGene00002025	hsp-60	Y22D7AL.5	III-8I05	ENSG00000144381	HSPD1	6	Ensembl Compara 87-89|Homologene|InParanoid|OMA|OrthoInspector|OrthoMCL		IPR001844 "Chaperonin Cpn60"|IPR002423 "Chaperonin Cpn60/TCP-1 family"|IPR017998 "Chaperone tailless complex polypeptide 1 (TCP-1)"|IPR027409 "GroEL-like apical domain"|IPR027413 "GroEL-like equatorial domain"	Leukodystrophy, hypomyelinating, 4, 612233|Spastic paraplegia 13, autosomal dominant, 605280
WBGene00002028	hst-1	F08B4.6	IV-4M04	ENSG00000166507	NDST2	6	Ensembl Compara 87-89|Homologene|InParanoid|OMA|OrthoInspector|OrthoMCL		IPR000863 "Sulfotransferase domain"|IPR021930 "Heparan sulphate-N-deacetylase"|IPR027417 "P-loop containing nucleoside triphosphate hydrolase"
WBGene00002035	hum-1	F29D10.4	I-4K18	ENSG00000157483	MYO1E	6	Ensembl Compara 87-89|Homologene|InParanoid|OMA|OrthoInspector|OrthoMCL	SM00242|SM00326	IPR001452 "SH3 domain"|IPR001609 "Myosin head, motor domain"|IPR010926 "Class I myosin tail homology domain"|IPR027417 "P-loop containing nucleoside triphosphate hydrolase"	Glomerulosclerosis, focal segmental, 6, 614131
WBGene00002036	hum-2	F36D4.3	V-6J15	ENSG00000197535	MYO5A	6	Ensembl Compara 87-89|Homologene|InParanoid|OMA|OrthoInspector|OrthoMCL	SM00015|SM00242|SM01132	IPR000048 "IQ motif, EF-hand binding site"|IPR001609 "Myosin head, motor domain"|IPR002710 "Dilute domain"|IPR027417 "P-loop containing nucleoside triphosphate hydrolase"	Griscelli syndrome, type 1, 214450
WBGene00002038	hum-5	T02C12.1	III-2A17	ENSG00000176658	MYO1D	6	Ensembl Compara 87-89|Homologene|InParanoid|OMA|OrthoInspector|OrthoMCL	SM00015|SM00242	IPR001609 "Myosin head, motor domain"|IPR010926 "Class I myosin tail homology domain"|IPR027417 "P-loop containing nucleoside triphosphate hydrolase"
WBGene00002041	hum-8	Y66H1A.6	IV-1K21	ENSG00000196586	MYO6	6	Ensembl Compara 87-89|Homologene|InParanoid|OMA|OrthoInspector|OrthoMCL	SM00242	IPR001609 "Myosin head, motor domain"|IPR027417 "P-loop containing nucleoside triphosphate hydrolase"|IPR032412 "Myosin VI, cargo binding domain"	Deafness, autosomal dominant 22, 606346|Deafness, autosomal dominant 22, with hypertrophic cardiomyopathy, 606346|Deafness, autosomal recessive 37, 607821
WBGene00004969	spe-15	F47G6.4	I-1A08	ENSG00000196586	MYO6	6	Ensembl Compara 87-89|Homologene|InParanoid|OMA|OrthoInspector|OrthoMCL	SM00242	IPR000048 "IQ motif, EF-hand binding site"|IPR001609 "Myosin head, motor domain"|IPR004009 "Myosin, N-terminal, SH3-like"|IPR027417 "P-loop containing nucleoside triphosphate hydrolase"|IPR032412 "Myosin VI, cargo binding domain"	Deafness, autosomal dominant 22, 606346|Deafness, autosomal dominant 22, with hypertrophic cardiomyopathy, 606346|Deafness, autosomal recessive 37, 607821
WBGene00002042	hus-1	H26D21.1	I-1F15	ENSG00000136273	HUS1	6	Ensembl Compara 87-89|Homologene|InParanoid|OMA|OrthoInspector|OrthoMCL		IPR007150 "Checkpoint protein Hus1/Mec3"|IPR016580 "Cell cycle checkpoint, Hus1"
WBGene00002043	hyl-1	C09G4.1	IV-9F06	ENSG00000139624	CERS5	6	Ensembl Compara 87-89|Homologene|InParanoid|OMA|OrthoInspector|OrthoMCL	SM00724	IPR006634 "TRAM/LAG1/CLN8 homology domain"|IPR016439 "Ceramide synthase component Lag1/Lac1"
WBGene00002044	hyl-2	K02G10.6	X-2D18	ENSG00000139624	CERS5	6	Ensembl Compara 87-89|Homologene|InParanoid|OMA|OrthoInspector|OrthoMCL	SM00724	IPR006634 "TRAM/LAG1/CLN8 homology domain"|IPR016439 "Ceramide synthase component Lag1/Lac1"
WBGene00002061	ife-3	B0348.6	V-1A13	ENSG00000151247	EIF4E	6	Ensembl Compara 87-89|Homologene|InParanoid|OMA|OrthoInspector|OrthoMCL		IPR001040 "Translation Initiation factor eIF- 4e"|IPR023398 "Translation Initiation factor eIF- 4e-like"	Autism, susceptibility to, 19, 615091
WBGene00002062	ife-4	C05D9.5	X-1E02	ENSG00000135930	EIF4E2	6	Ensembl Compara 87-89|Homologene|InParanoid|OMA|OrthoInspector|OrthoMCL		IPR001040 "Translation Initiation factor eIF- 4e"|IPR023398 "Translation Initiation factor eIF- 4e-like"
WBGene00002070	ile-1	K07A1.8	I-4D06	ENSG00000074695	LMAN1	6	Ensembl Compara 87-89|Homologene|InParanoid|OMA|OrthoInspector|OrthoMCL		IPR005052 "Legume-like lectin"|IPR009071 "High mobility group box domain"|IPR013320 "Concanavalin A-like lectin/glucanase domain"	Combined factor V and VIII deficiency, 227300
WBGene00002071	ile-2	T04G9.3	X-1K11	ENSG00000114988	LMAN2L	6	Ensembl Compara 87-89|Homologene|InParanoid|OMA|OrthoInspector|OrthoMCL		IPR005052 "Legume-like lectin"|IPR013320 "Concanavalin A-like lectin/glucanase domain"	Mental retardation, autosomal recessive, 52, 616887
WBGene00002074	ima-3	F32E10.4	IV-3H04	ENSG00000186432	KPNA4	6	Ensembl Compara 87-89|Homologene|InParanoid|OMA|OrthoInspector|OrthoMCL	SM00185	IPR000225 "Armadillo"|IPR002652 "Importin-alpha, importin-beta-binding domain"|IPR011989 "Armadillo-like helical"|IPR016024 "Armadillo-type fold"|IPR024931 "Importin subunit alpha"|IPR032413 "Atypical Arm repeat"
WBGene00002075	imb-1	F28B3.8	I-9A16	ENSG00000108424	KPNB1	6	Ensembl Compara 87-89|Homologene|InParanoid|OMA|OrthoInspector|OrthoMCL	SM00185|SM00913	IPR001494 "Importin-beta, N-terminal domain"|IPR011989 "Armadillo-like helical"|IPR016024 "Armadillo-type fold"
WBGene00002076	imb-2	R06A4.4	II-9I19	ENSG00000083312	TNPO1	6	Ensembl Compara 87-89|Homologene|InParanoid|OMA|OrthoInspector|OrthoMCL	SM00913	IPR001494 "Importin-beta, N-terminal domain"|IPR011989 "Armadillo-like helical"|IPR016024 "Armadillo-type fold"
WBGene00002077	imb-3	C53D5.6	I-1C13|I-1E05	ENSG00000065150	IPO5	6	Ensembl Compara 87-89|Homologene|InParanoid|OMA|OrthoInspector|OrthoMCL	SM01349	IPR000357 "HEAT repeat"|IPR011989 "Armadillo-like helical"|IPR016024 "Armadillo-type fold"
WBGene00002078	xpo-1	ZK742.1	V-5L21	ENSG00000082898	XPO1	6	Ensembl Compara 87-89|Homologene|InParanoid|OMA|OrthoInspector|OrthoMCL	SM00913|SM01102	IPR001494 "Importin-beta, N-terminal domain"|IPR011989 "Armadillo-like helical"|IPR013598 "Exportin-1/Importin-beta-like"|IPR014877 "CRM1 C-terminal domain"|IPR016024 "Armadillo-type fold"
WBGene00002080	xpo-3	C49H3.10	IV-4C19	ENSG00000184575	XPOT	6	Ensembl Compara 87-89|Homologene|InParanoid|OMA|OrthoInspector|OrthoMCL	SM00913	IPR013598 "Exportin-1/Importin-beta-like"|IPR016024 "Armadillo-type fold"
WBGene00002081	ina-1	F54G8.3	III-4N10	ENSG00000091409	ITGA6	6	Ensembl Compara 87-89|Homologene|InParanoid|OMA|OrthoInspector|OrthoMCL	SM00191	IPR000413 "Integrin alpha chain"|IPR013517 "FG-GAP repeat"|IPR013519 "Integrin alpha beta-propellor"|IPR013649 "Integrin alpha-2"|IPR018184 "Integrin alpha chain, C-terminal cytoplasmic region, conserved site"|IPR032695 "Integrin domain"	Epidermolysis bullosa, junctional, with pyloric stenosis, 226730
WBGene00002083	inf-1	F57B9.6	III-3L21	ENSG00000156976	EIF4A2	6	Ensembl Compara 87-89|Homologene|InParanoid|OMA|OrthoInspector|OrthoMCL	SM00487|SM00490	IPR001650 "Helicase, C-terminal"|IPR011545 "DEAD/DEAH box helicase domain"|IPR014001 "Helicase superfamily 1/2, ATP-binding domain"|IPR027417 "P-loop containing nucleoside triphosphate hydrolase"
WBGene00002146	ipp-5	C09B8.1	X-3C18	ENSG00000068383	INPP5A	6	Ensembl Compara 87-89|Homologene|InParanoid|OMA|OrthoInspector|OrthoMCL	SM00128	IPR000300 "Inositol polyphosphate-related phosphatase"|IPR005135 "Endonuclease/exonuclease/phosphatase"
WBGene00002150	irk-2	M02A10.2	X-1I19|X-1I21	ENSG00000184185	KCNJ12	6	Ensembl Compara 87-89|Homologene|InParanoid|OMA|OrthoInspector|OrthoMCL		IPR013518 "Potassium channel, inwardly rectifying, Kir, cytoplasmic"|IPR014756 "Immunoglobulin E-set"|IPR016449 "Potassium channel, inwardly rectifying, Kir"
WBGene00002152	iars-1	R11A8.6	IV-5B17	ENSG00000196305	IARS	6	Ensembl Compara 87-89|Homologene|InParanoid|OMA|OrthoInspector|OrthoMCL		IPR002300 "Aminoacyl-tRNA synthetase, class Ia"|IPR002301 "Isoleucine-tRNA ligase"|IPR009008 "Valyl/Leucyl/Isoleucyl-tRNA synthetase, editing domain"|IPR009080 "Aminoacyl-tRNA synthetase, class Ia, anticodon-binding"|IPR013155 "Methionyl/Valyl/Leucyl/Isoleucyl-tRNA synthetase, anticodon-binding"|IPR014729 "Rossmann-like alpha/beta/alpha sandwich fold"	Growth retardation, intellectual developmental disorder, hypotonia, and hepatopathy, 617093
WBGene00002153	iars-2	C25A1.7	I-5I01	ENSG00000067704	IARS2	6	Ensembl Compara 87-89|Homologene|InParanoid|OMA|OrthoInspector|OrthoMCL		IPR002300 "Aminoacyl-tRNA synthetase, class Ia"|IPR002301 "Isoleucine-tRNA ligase"|IPR009008 "Valyl/Leucyl/Isoleucyl-tRNA synthetase, editing domain"|IPR009080 "Aminoacyl-tRNA synthetase, class Ia, anticodon-binding"|IPR013155 "Methionyl/Valyl/Leucyl/Isoleucyl-tRNA synthetase, anticodon-binding"|IPR014729 "Rossmann-like alpha/beta/alpha sandwich fold"	Cataracts, growth hormone deficiency, sensory neuropathy, sensorineural hearing loss, and skeletal dyspl
WBGene00002162	isp-1	F42G8.12		ENSG00000169021	UQCRFS1	6	Ensembl Compara 87-89|Homologene|InParanoid|OMA|OrthoInspector|OrthoMCL		IPR004192 "Ubiquinol cytochrome reductase, transmembrane domain"|IPR005805 "Rieske iron-sulphur protein, C-terminal"|IPR006317 "Ubiquinol-cytochrome c reductase, iron-sulphur subunit"|IPR014349 "Rieske iron-sulphur protein"|IPR017941 "Rieske [2Fe-2S] iron-sulphur domain"
WBGene00002173	itr-1	F33D4.2	IV-3J16	ENSG00000150995	ITPR1	6	Ensembl Compara 87-89|Homologene|InParanoid|OMA|OrthoInspector|OrthoMCL	SM00472	IPR000493 "Inositol 1,4,5-trisphosphate-binding protein receptor"|IPR000699 "RIH (RyR and IP3R Homology) domain"|IPR005821 "Ion transport domain"|IPR013662 "RyR/IP3R Homology associated domain"|IPR014821 "Inositol 1,4,5-trisphosphate/ryanodine receptor"|IPR015925 "Ryanodine receptor-related"|IPR016024 "Armadillo-type fold"|IPR016093 "MIR motif"	Gillespie syndrome, 206700|Spinocerebellar ataxia 15, 606658|Spinocerebellar ataxia 29, congenital nonprogressive, 117360
WBGene00003772	nlr-1	F20B10.1	IV-6B01|IV-6B03	ENSG00000155052	CNTNAP5	6	Ensembl Compara 87-89|Homologene|InParanoid|OMA|OrthoInspector|OrthoMCL	SM00181|SM00231|SM00282	IPR000742 "EGF-like domain"|IPR001791 "Laminin G domain"|IPR001881 "EGF-like calcium-binding domain"|IPR013320 "Concanavalin A-like lectin/glucanase domain"
WBGene00003185	mek-1	K08A8.1	X-3L04	ENSG00000076984	MAP2K7	6	Ensembl Compara 87-89|Homologene|InParanoid|OMA|OrthoInspector|OrthoMCL	SM00220	IPR000719 "Protein kinase domain"|IPR011009 "Protein kinase-like domain"
WBGene00002182	kap-1	F08F8.3	III-3N14	ENSG00000075945	KIFAP3	6	Ensembl Compara 87-89|Homologene|InParanoid|OMA|OrthoInspector|OrthoMCL	SM00185|SM01297	IPR000225 "Armadillo"|IPR008658 "Kinesin-associated protein 3"|IPR011989 "Armadillo-like helical"|IPR016024 "Armadillo-type fold"
WBGene00002183	kat-1	T02G5.8	II-5K18	ENSG00000075239	ACAT1	6	Ensembl Compara 87-89|Homologene|InParanoid|OMA|OrthoInspector|OrthoMCL		IPR002155 "Thiolase"|IPR016039 "Thiolase-like"|IPR020616 "Thiolase, N-terminal"|IPR020617 "Thiolase, C-terminal"	Alpha-methylacetoacetic aciduria, 203750
WBGene00002184	kel-1	C47D12.7	II-7P08	ENSG00000146021	KLHL3	6	Ensembl Compara 87-89|Homologene|InParanoid|OMA|OrthoInspector|OrthoMCL	SM00225|SM00612|SM00875	IPR000210 "BTB/POZ domain"|IPR006652 "Kelch repeat type 1"|IPR011333 "SKP1/BTB/POZ domain"|IPR011705 "BTB/Kelch-associated"|IPR015916 "Galactose oxidase, beta-propeller"|IPR017096 "BTB-kelch protein"	Pseudohypoaldosteronism, type IID, 614495
WBGene00002185	kel-3	T27E9.4	III-6P03	ENSG00000114648	KLHL18	6	Ensembl Compara 87-89|Homologene|InParanoid|OMA|OrthoInspector|OrthoMCL	SM00225|SM00612|SM00875	IPR000210 "BTB/POZ domain"|IPR006652 "Kelch repeat type 1"|IPR011333 "SKP1/BTB/POZ domain"|IPR011705 "BTB/Kelch-associated"|IPR015915 "Kelch-type beta propeller"|IPR017096 "BTB-kelch protein"
WBGene00002189	kin-1	ZK909.2	I-7K20	ENSG00000142875	PRKACB	6	Ensembl Compara 87-89|Homologene|InParanoid|OMA|OrthoInspector|OrthoMCL	SM00133|SM00220	IPR000719 "Protein kinase domain"|IPR000961 "AGC-kinase, C-terminal"|IPR011009 "Protein kinase-like domain"
WBGene00002190	kin-2	R07E4.6	X-3C08	ENSG00000188191	PRKAR1B	6	Ensembl Compara 87-89|Homologene|InParanoid|OMA|OrthoInspector|OrthoMCL	SM00100|SM00394	IPR000595 "Cyclic nucleotide-binding domain"|IPR003117 "cAMP-dependent protein kinase regulatory subunit, dimerization-anchoring domain"|IPR012198 "cAMP-dependent protein kinase regulatory subunit"|IPR014710 "RmlC-like jelly roll fold"|IPR018490 "Cyclic nucleotide-binding-like"
WBGene00002191	kin-3	B0205.7		ENSG00000101266	CSNK2A1	6	Ensembl Compara 87-89|Homologene|InParanoid|OMA|OrthoInspector|OrthoMCL	SM00220	IPR000719 "Protein kinase domain"|IPR011009 "Protein kinase-like domain"	Okur-Chung neurodevelopmental syndrome, 617062
WBGene00002201	kin-18	T17E9.1	III-3O13	ENSG00000160551	TAOK1	6	Ensembl Compara 87-89|Homologene|InParanoid|OMA|OrthoInspector|OrthoMCL	SM00220	IPR000719 "Protein kinase domain"|IPR011009 "Protein kinase-like domain"
WBGene00002217	klp-4	F56E3.3	X-2K05	ENSG00000137177	KIF13A	6	Ensembl Compara 87-89|Homologene|InParanoid|OMA|OrthoInspector|OrthoMCL	SM00129	IPR000253 "Forkhead-associated (FHA) domain"|IPR001752 "Kinesin motor domain"|IPR008984 "SMAD/FHA domain"|IPR022140 "Kinesin-like KIF1-type"|IPR022164 "Kinesin-like"|IPR027417 "P-loop containing nucleoside triphosphate hydrolase"|IPR027640 "Kinesin-like protein"|IPR032405 "Kinesin-associated"
WBGene00002223	klp-12	T01G1.1	IV-6G03	ENSG00000139116	KIF21A	6	Ensembl Compara 87-89|Homologene|InParanoid|OMA|OrthoInspector|OrthoMCL	SM00129|SM00320	IPR001680 "WD40 repeat"|IPR001752 "Kinesin motor domain"|IPR015943 "WD40/YVTN repeat-like-containing domain"|IPR017986 "WD40-repeat-containing domain"|IPR020472 "G-protein beta WD-40 repeat"|IPR027417 "P-loop containing nucleoside triphosphate hydrolase"|IPR027640 "Kinesin-like protein"	Fibrosis of extraocular muscles, congenital, 1, 135700|Fibrosis of extraocular muscles, congenital, 3B, 135700
WBGene00002229	klp-19	Y43F4B.6	III-6H23	ENSG00000090889	KIF4A	6	Ensembl Compara 87-89|Homologene|InParanoid|OMA|OrthoInspector|OrthoMCL	SM00129	IPR001752 "Kinesin motor domain"|IPR027417 "P-loop containing nucleoside triphosphate hydrolase"|IPR027640 "Kinesin-like protein"	Mental retardation, X-linked 100, 300923
WBGene00002230	klp-20	Y50D7A.6	III-8A13	ENSG00000131437	KIF3A	6	Ensembl Compara 87-89|Homologene|InParanoid|OMA|OrthoInspector|OrthoMCL	SM00129	IPR001752 "Kinesin motor domain"|IPR027417 "P-loop containing nucleoside triphosphate hydrolase"|IPR027640 "Kinesin-like protein"
WBGene00002232	kpc-1	F11A6.1	I-5J04	ENSG00000140564	FURIN	6	Ensembl Compara 87-89|Homologene|InParanoid|OMA|OrthoInspector|OrthoMCL	SM00261	IPR000209 "Peptidase S8/S53 domain"|IPR002884 "Proprotein convertase, P"|IPR008979 "Galactose-binding domain-like"|IPR009020 "Proteinase propeptide inhibitor"|IPR015500 "Peptidase S8, subtilisin-related"|IPR032815 "Peptidase S8, pro-domain"
WBGene00002235	kqt-3	Y54G9A.3	II-8H10|II-8H12	ENSG00000053918	KCNQ1	6	Ensembl Compara 87-89|Homologene|InParanoid|OMA|OrthoInspector|OrthoMCL		IPR003937 "Potassium channel, voltage dependent, KCNQ"|IPR005821 "Ion transport domain"|IPR013821 "Potassium channel, voltage dependent, KCNQ, C-terminal"|IPR028325 "Voltage-gated potassium channel"	Atrial fibrillation, familial, 3, 607554|Jervell and Lange-Nielsen syndrome, 220400|Long QT syndrome 1, 192500|Long QT syndrome 1, acquired, susceptibility to, 192500|Short QT syndrome 2, 609621
WBGene00002238	kars-1	T02G5.9	II-5K20	ENSG00000065427	KARS	6	Ensembl Compara 87-89|Homologene|InParanoid|OMA|OrthoInspector|OrthoMCL		IPR002313 "Lysine-tRNA ligase, class II"|IPR004364 "Aminoacyl-tRNA synthetase, class II (D/K/N)"|IPR004365 "OB-fold nucleic acid binding domain, AA-tRNA synthetase-type"|IPR012340 "Nucleic acid-binding, OB-fold"|IPR018149 "Lysyl-tRNA synthetase, class II, C-terminal"|IPR018150 "Aminoacyl-tRNA synthetase, class II (D/K/N)-like"	Charcot-Marie-Tooth disease, recessive intermediate, B, 613641|Deafness, autosomal recessive 89, 613916
WBGene00002247	lam-1	W03F8.5	IV-2P15	ENSG00000172037	LAMB2	6	Ensembl Compara 87-89|Homologene|InParanoid|OMA|OrthoInspector|OrthoMCL	SM00136|SM00180|SM00181	IPR000742 "EGF-like domain"|IPR002049 "Laminin EGF domain"|IPR008211 "Laminin, N-terminal"|IPR008979 "Galactose-binding domain-like"	Nephrotic syndrome, type 5, with or without ocular abnormalities, 614199|Pierson syndrome, 609049
WBGene00002248	lam-3	T22A3.8	I-5G24|I-5I06	ENSG00000196569	LAMA2	6	Ensembl Compara 87-89|Homologene|InParanoid|OMA|OrthoInspector|OrthoMCL	SM00136|SM00180|SM00181|SM00281|SM00282	IPR000034 "Laminin IV"|IPR000742 "EGF-like domain"|IPR001791 "Laminin G domain"|IPR002049 "Laminin EGF domain"|IPR008211 "Laminin, N-terminal"|IPR013320 "Concanavalin A-like lectin/glucanase domain"	Muscular dystrophy, congenital merosin-deficient, 607855|Muscular dystrophy, congenital, due to partial LAMA2 deficiency, 607855
WBGene00002249	lap-1	ZK353.6	III-4B11	ENSG00000215440	NPEPL1	6	Ensembl Compara 87-89|Homologene|InParanoid|OMA|OrthoInspector|OrthoMCL		IPR000819 "Peptidase M17, leucyl aminopeptidase, C-terminal"|IPR011356 "Peptidase M17, leucine aminopeptidase/peptidase B"
WBGene00002262	ldh-1	F13D12.2	II-7P20	ENSG00000134333	LDHA	6	Ensembl Compara 87-89|Homologene|InParanoid|OMA|OrthoInspector|OrthoMCL		IPR001236 "Lactate/malate dehydrogenase, N-terminal"|IPR001557 "L-lactate/malate dehydrogenase"|IPR011304 "L-lactate dehydrogenase"|IPR015955 "Lactate dehydrogenase/glycoside hydrolase, family 4, C-terminal"|IPR016040 "NAD(P)-binding domain"|IPR022383 "Lactate/malate dehydrogenase, C-terminal"	Glycogen storage disease XI, 612933
WBGene00002324	let-49	Y54E5B.3	I-7I14	ENSG00000155868	MED7	6	Ensembl Compara 87-89|Homologene|InParanoid|OMA|OrthoInspector|OrthoMCL		IPR009244 "Mediator complex, subunit Med7"
WBGene00002335	let-60	ZK792.6	IV-6A16	ENSG00000133703	KRAS	6	Ensembl Compara 87-89|Homologene|InParanoid|OMA|OrthoInspector|OrthoMCL	SM00173|SM00174|SM00175|SM00176	IPR001806 "Small GTPase superfamily"|IPR005225 "Small GTP-binding protein domain"|IPR020849 "Small GTPase superfamily, Ras type"|IPR027417 "P-loop containing nucleoside triphosphate hydrolase"	Bladder cancer, somatic, 109800|Breast cancer, somatic, 114480|Cardiofaciocutaneous syndrome 2, 615278|Gastric cancer, somatic, 137215|Leukemia, acute myeloid, 601626|Lung cancer, somatic, 211980|Noonan syndrome 3, 609942|Pancreatic carcinoma, somatic, 260350|RAS-associated autoimmune leukoproliferative disorder, 614470|Schimmelpenning-Feuerstein-Mims syndrome, somatic mosaic, 163200
WBGene00002363	let-92	F38H4.9	IV-6G06	ENSG00000113575	PPP2CA	6	Ensembl Compara 87-89|Homologene|InParanoid|OMA|OrthoInspector|OrthoMCL	SM00156	IPR004843 "Calcineurin-like phosphoesterase domain, apaH type"|IPR006186 "Serine/threonine-specific protein phosphatase/bis(5-nucleosyl)-tetraphosphatase"|IPR029052 "Metallo-dependent phosphatase-like"
WBGene00002497	let-268	F52H3.1	II-7I09	ENSG00000106397	PLOD3	6	Ensembl Compara 87-89|Homologene|InParanoid|OMA|OrthoInspector|OrthoMCL	SM00702	IPR006620 "Prolyl 4-hydroxylase, alpha subunit"|IPR029044 "Nucleotide-diphospho-sugar transferases"	Lysyl hydroxylase 3 deficiency, 612394
WBGene00002694	let-502	C10H11.9	I-2I07	ENSG00000134318	ROCK2	6	Ensembl Compara 87-89|Homologene|InParanoid|OMA|OrthoInspector|OrthoMCL	SM00109|SM00133|SM00220|SM00233	IPR000719 "Protein kinase domain"|IPR000961 "AGC-kinase, C-terminal"|IPR002219 "Protein kinase C-like, phorbol ester/diacylglycerol-binding domain"|IPR011009 "Protein kinase-like domain"|IPR011993 "PH domain-like"|IPR029875 "Rho-associated protein kinase LET-502"
WBGene00002845	let-711	F57B9.2	III-3L13	ENSG00000125107	CNOT1	6	Ensembl Compara 87-89|Homologene|InParanoid|OMA|OrthoInspector|OrthoMCL		IPR007196 "CCR4-Not complex component, Not1, C-terminal"|IPR024557 "CCR4-Not complex, Not1 subunit, domain of unknown function DUF3819"|IPR032191 "CCR4-NOT transcription complex subunit 1, CAF1-binding domain"|IPR032193 "CCR4-NOT transcription complex subunit 1, TTP binding domain"|IPR032194 "CCR4-NOT transcription complex subunit 1, HEAT repeat"
WBGene00002855	let-721	C05D11.12	III-3M16	ENSG00000171503	ETFDH	6	Ensembl Compara 87-89|Homologene|InParanoid|OMA|OrthoInspector|OrthoMCL		IPR007859 "ETF-QO/FixX"|IPR023753 "FAD/NAD(P)-binding domain"	Glutaric acidemia IIC, 231680
WBGene00002879	let-754	C29E4.8	III-4M21	ENSG00000004455	AK2	6	Ensembl Compara 87-89|Homologene|InParanoid|OMA|OrthoInspector|OrthoMCL		IPR000850 "Adenylate kinase/UMP-CMP kinase"|IPR006259 "Adenylate kinase subfamily"|IPR007862 "Adenylate kinase, active site lid domain"|IPR027417 "P-loop containing nucleoside triphosphate hydrolase"	Reticular dysgenesis, 267500
WBGene00002978	lev-11	Y105E8B.1	I-9N05	ENSG00000140416	TPM1	6	Ensembl Compara 87-89|Homologene|InParanoid|OMA|OrthoInspector|OrthoMCL		IPR000533 "Tropomyosin"	Cardiomyopathy, dilated, 1Y, 611878|Cardiomyopathy, hypertrophic, 3, 115196|Left ventricular noncompaction 9, 611878
WBGene00002981	lgg-2	ZK593.6	IV-5F02	ENSG00000101460	MAP1LC3A	6	Ensembl Compara 87-89|Homologene|InParanoid|OMA|OrthoInspector|OrthoMCL		IPR004241 "Autophagy protein Atg8 ubiquitin-like"|IPR029071 "Ubiquitin-related domain"
WBGene00002985	lig-1	C29A12.3	V-7O12	ENSG00000105486	LIG1	6	Ensembl Compara 87-89|Homologene|InParanoid|OMA|OrthoInspector|OrthoMCL		IPR000977 "DNA ligase, ATP-dependent"|IPR012308 "DNA ligase, ATP-dependent, N-terminal"|IPR012309 "DNA ligase, ATP-dependent, C-terminal"|IPR012310 "DNA ligase, ATP-dependent, central"|IPR012340 "Nucleic acid-binding, OB-fold"	DNA ligase I deficiency
WBGene00002996	lin-7	Y54G11A.10	II-9I09	ENSG00000104863	LIN7B	6	Ensembl Compara 87-89|Homologene|InParanoid|OMA|OrthoInspector|OrthoMCL	SM00228|SM00569	IPR001478 "PDZ domain"|IPR004172 "L27 domain"|IPR014775 "L27 domain, C-terminal"
WBGene00002998	lin-9	ZK637.7	III-4D08	ENSG00000183814	LIN9	6	Ensembl Compara 87-89|Homologene|InParanoid|OMA|OrthoInspector|OrthoMCL	SM01135	IPR010561 "Protein LIN-9/Protein ALWAYS EARLY"|IPR033471 "DIRP domain"
WBGene00003007	lin-18	C16B8.1	X-2B07	ENSG00000163785	RYK	6	Ensembl Compara 87-89|Homologene|InParanoid|OMA|OrthoInspector|OrthoMCL	SM00219|SM00469	IPR001245 "Serine-threonine/tyrosine-protein kinase catalytic domain"|IPR003306 "WIF domain"|IPR011009 "Protein kinase-like domain"
WBGene00003009	lin-23	K10B2.1	II-10B02|II-4P11	ENSG00000072803	FBXW11	6	Ensembl Compara 87-89|Homologene|InParanoid|OMA|OrthoInspector|OrthoMCL	SM00256|SM00320|SM01028	IPR001680 "WD40 repeat"|IPR001810 "F-box domain"|IPR015943 "WD40/YVTN repeat-like-containing domain"|IPR017986 "WD40-repeat-containing domain"|IPR020472 "G-protein beta WD-40 repeat"|IPR021977 "D domain of beta-TrCP"
WBGene00003020	lin-35	C32F10.2	I-2N15	ENSG00000080839	RBL1	6	Ensembl Compara 87-89|Homologene|InParanoid|OMA|OrthoInspector|OrthoMCL	SM00385|SM01367|SM01368|SM01369	IPR002719 "Retinoblastoma-associated protein, B-box"|IPR002720 "Retinoblastoma-associated protein, A-box"|IPR013763 "Cyclin-like"|IPR015652 "Retinoblastoma-related protein"|IPR024599 "Retinoblastoma-associated protein, N-terminal"|IPR028309 "Retinoblastoma protein family"
WBGene00003026	lin-41	C12C8.3	I-4J11	ENSG00000206557	TRIM71	6	Ensembl Compara 87-89|Homologene|InParanoid|OMA|OrthoInspector|OrthoMCL	SM00184|SM00336|SM00557	IPR000315 "B-box-type zinc finger"|IPR001258 "NHL repeat"|IPR001298 "Filamin/ABP280 repeat"|IPR003649 "B-box, C-terminal"|IPR011042 "Six-bladed beta-propeller, TolB-like"|IPR013783 "Immunoglobulin-like fold"|IPR014756 "Immunoglobulin E-set"|IPR017868 "Filamin/ABP280 repeat-like"
WBGene00003030	lin-45	Y73B6A.5		ENSG00000157764	BRAF	6	Ensembl Compara 87-89|Homologene|InParanoid|OMA|OrthoInspector|OrthoMCL	SM00109|SM00220|SM00455	IPR000719 "Protein kinase domain"|IPR001245 "Serine-threonine/tyrosine-protein kinase catalytic domain"|IPR002219 "Protein kinase C-like, phorbol ester/diacylglycerol-binding domain"|IPR003116 "Raf-like Ras-binding"|IPR011009 "Protein kinase-like domain"|IPR029071 "Ubiquitin-related domain"	Adenocarcinoma of lung, somatic, 211980|Cardiofaciocutaneous syndrome, 115150|Colorectal cancer, somatic|LEOPARD syndrome 3, 613707|Melanoma, malignant, somatic|Nonsmall cell lung cancer, somatic|Noonan syndrome 7, 613706
WBGene00003036	lin-53	K07A1.12	I-4D14	ENSG00000162521	RBBP4	6	Ensembl Compara 87-89|Homologene|InParanoid|OMA|OrthoInspector|OrthoMCL	SM00320	IPR001680 "WD40 repeat"|IPR015943 "WD40/YVTN repeat-like-containing domain"|IPR017986 "WD40-repeat-containing domain"|IPR020472 "G-protein beta WD-40 repeat"|IPR022052 "Histone-binding protein RBBP4, N-terminal"
WBGene00003047	lis-1	T03F6.5	III-6L07	ENSG00000007168	PAFAH1B1	6	Ensembl Compara 87-89|Homologene|InParanoid|OMA|OrthoInspector|OrthoMCL	SM00320|SM00667	IPR001680 "WD40 repeat"|IPR006594 "LIS1 homology motif"|IPR015943 "WD40/YVTN repeat-like-containing domain"|IPR017252 "Dynein regulator LIS1"|IPR017986 "WD40-repeat-containing domain"|IPR020472 "G-protein beta WD-40 repeat"	Lissencephaly 1, 607432|Subcortical laminar heterotopia, 607432
WBGene00003048	lit-1	W06F12.1	III-6F20	ENSG00000087095	NLK	6	Ensembl Compara 87-89|Homologene|InParanoid|OMA|OrthoInspector|OrthoMCL	SM00220	IPR000719 "Protein kinase domain"|IPR011009 "Protein kinase-like domain"
WBGene00003059	lpd-2	C48E7.3	I-2P22	ENSG00000129460	NGDN	6	Ensembl Compara 87-89|Homologene|InParanoid|OMA|OrthoInspector|OrthoMCL		IPR007146 "Sas10/Utp3/C1D"
WBGene00003061	lpd-5	ZK973.10	I-1L24	ENSG00000164258	NDUFS4	6	Ensembl Compara 87-89|Homologene|InParanoid|OMA|OrthoInspector|OrthoMCL		IPR006885 "NADH dehydrogenase ubiquinone Fe-S protein 4, mitochondrial"	Leigh syndrome, 256000|Mitochondrial complex I deficiency, 252010
WBGene00003063	lpd-7	R13A5.12	III-4C19|III-4C21	ENSG00000100029	PES1	6	Ensembl Compara 87-89|Homologene|InParanoid|OMA|OrthoInspector|OrthoMCL	SM00292	IPR001357 "BRCT domain"|IPR010613 "Pescadillo"
WBGene00003064	lpd-8	R10H10.1	IV-5B21	ENSG00000169599	NFU1	6	Ensembl Compara 87-89|Homologene|InParanoid|OMA|OrthoInspector|OrthoMCL	SM00932	IPR001075 "NIF system FeS cluster assembly, NifU, C-terminal"|IPR014824 "Scaffold protein Nfu/NifU, N-terminal"|IPR017065 "NFU1 iron-sulfur cluster scaffold homologue"	Multiple mitochondrial dysfunctions syndrome 1, 605711
WBGene00003071	lrp-1	F29D11.1	I-3D10	ENSG00000081479	LRP2	6	Ensembl Compara 87-89|Homologene|InParanoid|OMA|OrthoInspector|OrthoMCL	SM00135|SM00179|SM00181|SM00192	IPR000033 "LDLR class B repeat"|IPR000742 "EGF-like domain"|IPR001881 "EGF-like calcium-binding domain"|IPR002172 "Low-density lipoprotein (LDL) receptor class A repeat"|IPR009030 "Growth factor receptor cysteine-rich domain"|IPR011042 "Six-bladed beta-propeller, TolB-like"	Donnai-Barrow syndrome, 222448
WBGene00003074	lars-2	ZK524.3	I-9A19	ENSG00000011376	LARS2	6	Ensembl Compara 87-89|Homologene|InParanoid|OMA|OrthoInspector|OrthoMCL		IPR002300 "Aminoacyl-tRNA synthetase, class Ia"|IPR002302 "Leucine-tRNA ligase"|IPR009080 "Aminoacyl-tRNA synthetase, class Ia, anticodon-binding"|IPR013155 "Methionyl/Valyl/Leucyl/Isoleucyl-tRNA synthetase, anticodon-binding"|IPR014729 "Rossmann-like alpha/beta/alpha sandwich fold"|IPR015413 "Methionyl/Leucyl tRNA synthetase"	Hydrops, lactic acidosis, and sideroblastic anemia, 617021|Perrault syndrome 4, 615300
WBGene00003076	lsm-1	F40F8.9	II-7N09	ENSG00000175324	LSM1	6	Ensembl Compara 87-89|Homologene|InParanoid|OMA|OrthoInspector|OrthoMCL	SM00651	IPR001163 "LSM domain, eukaryotic/archaea-type"|IPR010920 "LSM domain"
WBGene00003077	lsm-3	Y62E10A.12	IV-7I15	ENSG00000170860	LSM3	6	Ensembl Compara 87-89|Homologene|InParanoid|OMA|OrthoInspector|OrthoMCL	SM00651	IPR001163 "LSM domain, eukaryotic/archaea-type"|IPR010920 "LSM domain"
WBGene00003079	lsm-5	F28F8.3	V-10A18	ENSG00000106355	LSM5	6	Ensembl Compara 87-89|Homologene|InParanoid|OMA|OrthoInspector|OrthoMCL	SM00651	IPR001163 "LSM domain, eukaryotic/archaea-type"|IPR010920 "LSM domain"
WBGene00003080	lsm-6	Y71G12B.14	I-8K01	ENSG00000164167	LSM6	6	Ensembl Compara 87-89|Homologene|InParanoid|OMA|OrthoInspector|OrthoMCL	SM00651	IPR001163 "LSM domain, eukaryotic/archaea-type"|IPR010920 "LSM domain"|IPR016487 "Sm-like protein Lsm6/SmF"
WBGene00003081	lsm-7	ZK593.7	IV-5F04	ENSG00000130332	LSM7	6	Ensembl Compara 87-89|Homologene|InParanoid|OMA|OrthoInspector|OrthoMCL	SM00651	IPR001163 "LSM domain, eukaryotic/archaea-type"|IPR010920 "LSM domain"|IPR017132 "Sm-like protein Lsm7/snRNP-G"
WBGene00003082	lsm-8	Y73B6BL.32		ENSG00000128534	LSM8	6	Ensembl Compara 87-89|Homologene|InParanoid|OMA|OrthoInspector|OrthoMCL	SM00651	IPR001163 "LSM domain, eukaryotic/archaea-type"|IPR010920 "LSM domain"
WBGene00003086	lst-4	Y37A1B.2	IV-7I22|IV-7I24	ENSG00000173548	SNX33	6	Ensembl Compara 87-89|Homologene|InParanoid|OMA|OrthoInspector|OrthoMCL	SM00312|SM00326	IPR001452 "SH3 domain"|IPR001683 "Phox homologous domain"|IPR014536 "Sorting nexin 9 subfamily"|IPR019497 "Sorting nexin protein, WASP-binding domain"|IPR028650 "Sorting nexin Lst-4"
WBGene00003119	mac-1	Y48C3A.7	II-8N19	ENSG00000143748	NVL	6	Ensembl Compara 87-89|Homologene|InParanoid|OMA|OrthoInspector|OrthoMCL	SM00382	IPR003593 "AAA+ ATPase domain"|IPR003959 "ATPase, AAA-type, core"|IPR027417 "P-loop containing nucleoside triphosphate hydrolase"|IPR031996 "NVL2, nucleolin binding domain"
WBGene00003123	mag-1	R09B3.5	I-5P24	ENSG00000111196	MAGOHB	6	Ensembl Compara 87-89|Homologene|InParanoid|OMA|OrthoInspector|OrthoMCL		IPR004023 "Mago nashi protein"
WBGene00003129	map-1	Y37E11AL.7	IV-9H01	ENSG00000164024	METAP1	6	Ensembl Compara 87-89|Homologene|InParanoid|OMA|OrthoInspector|OrthoMCL		IPR000994 "Peptidase M24, structural domain"|IPR001714 "Peptidase M24, methionine aminopeptidase"|IPR002467 "Peptidase M24A, methionine aminopeptidase, subfamily 1"|IPR031615 "MYND-like zinc finger, mRNA-binding"
WBGene00003136	mau-2	C09H6.3	I-4A23	ENSG00000129933	MAU2	6	Ensembl Compara 87-89|Homologene|InParanoid|OMA|OrthoInspector|OrthoMCL	SM00028	IPR011990 "Tetratricopeptide-like helical domain"|IPR019440 "Chromatid cohesion factor MAU2"
WBGene00003148	mbf-1	H21P03.1	IV-6K03	ENSG00000107223	EDF1	6	Ensembl Compara 87-89|Homologene|InParanoid|OMA|OrthoInspector|OrthoMCL	SM00530	IPR001387 "Cro/C1-type helix-turn-helix domain"|IPR010982 "Lambda repressor-like, DNA-binding domain"|IPR013729 "Multiprotein bridging factor 1, N-terminal"
WBGene00003154	mcm-2	Y17G7B.5	II-8I07	ENSG00000073111	MCM2	6	Ensembl Compara 87-89|Homologene|InParanoid|OMA|OrthoInspector|OrthoMCL	SM00350	IPR001208 "MCM domain"|IPR003593 "AAA+ ATPase domain"|IPR008045 "DNA replication licensing factor Mcm2"|IPR012340 "Nucleic acid-binding, OB-fold"|IPR027417 "P-loop containing nucleoside triphosphate hydrolase"|IPR027925 "MCM N-terminal domain"|IPR031327 "Mini-chromosome maintenance protein"	Deafness, autosomal dominant 70, 616968
WBGene00003156	mcm-4	Y39G10AR.14	I-7J13	ENSG00000104738	MCM4	6	Ensembl Compara 87-89|Homologene|InParanoid|OMA|OrthoInspector|OrthoMCL	SM00350	IPR001208 "MCM domain"|IPR003593 "AAA+ ATPase domain"|IPR004039 "Rubredoxin-type fold"|IPR008047 "Mini-chromosome maintenance complex protein 4"|IPR012340 "Nucleic acid-binding, OB-fold"|IPR027417 "P-loop containing nucleoside triphosphate hydrolase"|IPR027925 "MCM N-terminal domain"|IPR031327 "Mini-chromosome maintenance protein"	Natural killer cell and glucocorticoid deficiency with DNA repair defect, 609981
WBGene00003157	mcm-5	R10E4.4	III-2I21	ENSG00000100297	MCM5	6	Ensembl Compara 87-89|Homologene|InParanoid|OMA|OrthoInspector|OrthoMCL	SM00350	IPR001208 "MCM domain"|IPR008048 "DNA replication licensing factor Mcm"|IPR012340 "Nucleic acid-binding, OB-fold"|IPR027417 "P-loop containing nucleoside triphosphate hydrolase"|IPR027925 "MCM N-terminal domain"|IPR031327 "Mini-chromosome maintenance protein"	Meier-Gorlin syndrome 8, 617564
WBGene00003159	mcm-7	F32D1.10	V-3N07	ENSG00000166508	MCM7	6	Ensembl Compara 87-89|Homologene|InParanoid|OMA|OrthoInspector|OrthoMCL	SM00350|SM00382	IPR001208 "MCM domain"|IPR003593 "AAA+ ATPase domain"|IPR008050 "DNA replication licensing factor Mcm7"|IPR012340 "Nucleic acid-binding, OB-fold"|IPR027417 "P-loop containing nucleoside triphosphate hydrolase"|IPR027925 "MCM N-terminal domain"|IPR031327 "Mini-chromosome maintenance protein"
WBGene00003161	mdf-2	Y69A2AR.30	IV-8J08	ENSG00000164109	MAD2L1	6	Ensembl Compara 87-89|Homologene|InParanoid|OMA|OrthoInspector|OrthoMCL		IPR003511 "HORMA domain"|IPR027097 "Mitotic spindle checkpoint protein Mad2"
WBGene00003162	mdh-2	F20H11.3	III-3D03	ENSG00000146701	MDH2	6	Ensembl Compara 87-89|Homologene|InParanoid|OMA|OrthoInspector|OrthoMCL		IPR001236 "Lactate/malate dehydrogenase, N-terminal"|IPR001557 "L-lactate/malate dehydrogenase"|IPR010097 "Malate dehydrogenase, type 1"|IPR015955 "Lactate dehydrogenase/glycoside hydrolase, family 4, C-terminal"|IPR016040 "NAD(P)-binding domain"|IPR022383 "Lactate/malate dehydrogenase, C-terminal"	Epileptic encephalopathy, early infantile, 51, 617339
WBGene00003164	mdt-6	Y57E12AL.5	V-13M02|V-15B24	ENSG00000133997	MED6	6	Ensembl Compara 87-89|Homologene|InParanoid|OMA|OrthoInspector|OrthoMCL		IPR007018 "Mediator complex, subunit Med6"|IPR016820 "Mediator complex, subunit Med6, metazoa/plant"
WBGene00017089	poml-2	E01A2.7	I-1F04	ENSG00000105852	PON3	6	Ensembl Compara 87-89|Homologene|InParanoid|OMA|OrthoInspector|OrthoMCL		IPR002640 "Arylesterase"|IPR011042 "Six-bladed beta-propeller, TolB-like"
WBGene00003186	mek-2	Y54E10BL.6	I-7L14|I-7L20	ENSG00000169032	MAP2K1	6	Ensembl Compara 87-89|Homologene|InParanoid|OMA|OrthoInspector|OrthoMCL	SM00220	IPR000719 "Protein kinase domain"|IPR011009 "Protein kinase-like domain"	Cardiofaciocutaneous syndrome 3, 615279
WBGene00003214	mel-32	C05D11.11	III-3M14	ENSG00000176974	SHMT1	6	Ensembl Compara 87-89|Homologene|InParanoid|OMA|OrthoInspector|OrthoMCL		IPR001085 "Serine hydroxymethyltransferase"|IPR015421 "Pyridoxal phosphate-dependent transferase, major region, subdomain 1"|IPR015422 "Pyridoxal phosphate-dependent transferase, major region, subdomain 2"|IPR015424 "Pyridoxal phosphate-dependent transferase"
WBGene00003232	mgl-1	ZC506.4	X-4N06	ENSG00000198822	GRM3	6	Ensembl Compara 87-89|Homologene|InParanoid|OMA|OrthoInspector|OrthoMCL		IPR000162 "GPCR, family 3, metabotropic glutamate receptor"|IPR000337 "GPCR, family 3"|IPR001828 "Receptor, ligand binding region"|IPR011500 "GPCR, family 3, nine cysteines domain"|IPR017978 "GPCR family 3, C-terminal"|IPR028082 "Periplasmic binding protein-like I"
WBGene00003246	mig-14	R06B9.6	II-10B03	ENSG00000116729	WLS	6	Ensembl Compara 87-89|Homologene|InParanoid|OMA|OrthoInspector|OrthoMCL		IPR009551 "Protein wntless"
WBGene00003253	mig-22	PAR2.4	III-4P03	ENSG00000123989	CHPF	6	Ensembl Compara 87-89|Homologene|InParanoid|OMA|OrthoInspector|OrthoMCL		IPR008428 "Chondroitin N-acetylgalactosaminyltransferase"
WBGene00003254	mig-23	R07E4.4	X-3C04	ENSG00000198018	ENTPD7	6	Ensembl Compara 87-89|Homologene|InParanoid|OMA|OrthoInspector|OrthoMCL		IPR000407 "Nucleoside phosphatase GDA1/CD39"
WBGene00011734	mlc-5	T12D8.6	III-6D22	ENSG00000092841	MYL6	6	Ensembl Compara 87-89|Homologene|InParanoid|OMA|OrthoInspector|OrthoMCL	SM00054	IPR002048 "EF-hand domain"|IPR011992 "EF-hand domain pair"
WBGene00003372	mlc-4	C56G7.1		ENSG00000118680	MYL12B	6	Ensembl Compara 87-89|Homologene|InParanoid|OMA|OrthoInspector|OrthoMCL	SM00054	IPR002048 "EF-hand domain"|IPR011992 "EF-hand domain pair"
WBGene00003389	mog-1	K03H1.2	III-5G10	ENSG00000140829	DHX38	6	Ensembl Compara 87-89|Homologene|InParanoid|OMA|OrthoInspector|OrthoMCL	SM00487|SM00490|SM00847	IPR001650 "Helicase, C-terminal"|IPR007502 "Helicase-associated domain"|IPR011545 "DEAD/DEAH box helicase domain"|IPR011709 "Domain of unknown function DUF1605"|IPR014001 "Helicase superfamily 1/2, ATP-binding domain"|IPR027417 "P-loop containing nucleoside triphosphate hydrolase"
WBGene00003393	mog-5	EEED8.5	II-4I20	ENSG00000067596	DHX8	6	Ensembl Compara 87-89|Homologene|InParanoid|OMA|OrthoInspector|OrthoMCL	SM00316|SM00487|SM00490|SM00847	IPR001650 "Helicase, C-terminal"|IPR003029 "S1 domain"|IPR007502 "Helicase-associated domain"|IPR011709 "Domain of unknown function DUF1605"|IPR012340 "Nucleic acid-binding, OB-fold"|IPR014001 "Helicase superfamily 1/2, ATP-binding domain"|IPR022967 "RNA-binding domain, S1"|IPR027417 "P-loop containing nucleoside triphosphate hydrolase"
WBGene00003400	dapk-1	K12C11.4	I-1O17	ENSG00000196730	DAPK1	6	Ensembl Compara 87-89|Homologene|InParanoid|OMA|OrthoInspector|OrthoMCL	SM00005|SM00220|SM00248	IPR000488 "Death domain"|IPR000719 "Protein kinase domain"|IPR002110 "Ankyrin repeat"|IPR011009 "Protein kinase-like domain"|IPR011029 "Death-like domain"|IPR020683 "Ankyrin repeat-containing domain"|IPR027417 "P-loop containing nucleoside triphosphate hydrolase"
WBGene00003401	mpk-1	F43C1.2	III-2I01|III-2I07	ENSG00000100030	MAPK1	6	Ensembl Compara 87-89|Homologene|InParanoid|OMA|OrthoInspector|OrthoMCL	SM00220	IPR000719 "Protein kinase domain"|IPR008349 "Mitogen-activated protein (MAP) kinase, ERK1/2"|IPR011009 "Protein kinase-like domain"
WBGene00003405	mre-11	ZC302.1	V-7K02	ENSG00000020922	MRE11	6	Ensembl Compara 87-89|Homologene|InParanoid|OMA|OrthoInspector|OrthoMCL	SM01347	IPR003701 "DNA double-strand break repair protein Mre11"|IPR004843 "Calcineurin-like phosphoesterase domain, apaH type"|IPR007281 "Mre11, DNA-binding"|IPR029052 "Metallo-dependent phosphatase-like"	Ataxia-telangiectasia-like disorder 1, 604391
WBGene00003411	mrp-5	F14F4.3	X-6N12	ENSG00000114770	ABCC5	6	Ensembl Compara 87-89|Homologene|InParanoid|OMA|OrthoInspector|OrthoMCL	SM00382	IPR003439 "ABC transporter-like"|IPR003593 "AAA+ ATPase domain"|IPR011527 "ABC transporter type 1, transmembrane domain"|IPR027417 "P-loop containing nucleoside triphosphate hydrolase"
WBGene00003417	mrt-2	Y41C4A.14	III-6G01	ENSG00000113456	RAD1	6	Ensembl Compara 87-89|Homologene|InParanoid|OMA|OrthoInspector|OrthoMCL		IPR003011 "Cell cycle checkpoint protein, Rad1"|IPR003021 "Rad1/Rec1/Rad17"
WBGene00003422	msh-6	Y47G6A.11	I-7N01	ENSG00000116062	MSH6	6	Ensembl Compara 87-89|Homologene|InParanoid|OMA|OrthoInspector|OrthoMCL	SM00293|SM00533|SM00534	IPR000432 "DNA mismatch repair protein MutS, C-terminal"|IPR007695 "DNA mismatch repair protein MutS-like, N-terminal"|IPR007696 "DNA mismatch repair protein MutS, core"|IPR007860 "DNA mismatch repair protein MutS, connector domain"|IPR007861 "DNA mismatch repair protein MutS, clamp"|IPR016151 "DNA mismatch repair protein MutS, N-terminal"|IPR027417 "P-loop containing nucleoside triphosphate hydr…	Colorectal cancer, hereditary nonpolyposis, type 5, 614350|Endometrial cancer, familial, 608089|Mismatch repair cancer syndrome, 276300
WBGene00003475	mtm-1	Y110A7A.5	I-2E18	ENSG00000171100	MTM1	6	Ensembl Compara 87-89|Homologene|InParanoid|OMA|OrthoInspector|OrthoMCL	SM00404|SM00568	IPR003595 "Protein-tyrosine phosphatase, catalytic"|IPR004182 "GRAM domain"|IPR010569 "Myotubularin-like phosphatase domain"|IPR011993 "PH domain-like"|IPR029021 "Protein-tyrosine phosphatase-like"|IPR030564 "Myotubularin family"	Myotubular myopathy, X-linked, 310400
WBGene00003477	mtm-5	H28G03.6	X-3A07	ENSG00000133812	SBF2	6	Ensembl Compara 87-89|Homologene|InParanoid|OMA|OrthoInspector|OrthoMCL	SM00233|SM00568|SM00799|SM00800|SM00801	IPR001194 "DENN domain"|IPR001849 "Pleckstrin homology domain"|IPR004182 "GRAM domain"|IPR005112 "dDENN domain"|IPR005113 "uDENN domain"|IPR010569 "Myotubularin-like phosphatase domain"|IPR011993 "PH domain-like"|IPR022096 "SBF1/SBF2 domain"|IPR029021 "Protein-tyrosine phosphatase-like"|IPR030564 "Myotubularin family"	Charcot-Marie-Tooth disease, type 4B2, 604563
WBGene00003479	mtm-9	Y39H10A.3	V-16A10	ENSG00000104643	MTMR9	6	Ensembl Compara 87-89|Homologene|InParanoid|OMA|OrthoInspector|OrthoMCL		IPR010569 "Myotubularin-like phosphatase domain"|IPR029021 "Protein-tyrosine phosphatase-like"|IPR030564 "Myotubularin family"
WBGene00003517	nac-1	F31F6.6	X-6L24	ENSG00000007216	SLC13A2	6	Ensembl Compara 87-89|Homologene|InParanoid|OMA|OrthoInspector|OrthoMCL		IPR001898 "Sodium/sulphate symporter"
WBGene00003519	nac-3	K08E5.2	III-5O16	ENSG00000007216	SLC13A2	6	Ensembl Compara 87-89|Homologene|InParanoid|OMA|OrthoInspector|OrthoMCL		IPR001898 "Sodium/sulphate symporter"
WBGene00003555	nas-39	F38E9.2	X-7M02	ENSG00000038295	TLL1	6	Ensembl Compara 87-89|Homologene|InParanoid|OMA|OrthoInspector|OrthoMCL	SM00042|SM00179|SM00181|SM00235	IPR000742 "EGF-like domain"|IPR000859 "CUB domain"|IPR001506 "Peptidase M12A, astacin"|IPR001881 "EGF-like calcium-binding domain"|IPR006026 "Peptidase, metallopeptidase"|IPR015446 "Bone morphogenetic protein 1/tolloid-like protein"|IPR024079 "Metallopeptidase, catalytic domain"	Atrial septal defect 6, 613087
WBGene00003558	nca-2	C27F2.2	III-2H17|III-2H19	ENSG00000102452	NALCN	6	Ensembl Compara 87-89|Homologene|InParanoid|OMA|OrthoInspector|OrthoMCL		IPR005821 "Ion transport domain"|IPR027359 "Voltage-dependent channel, four helix bundle domain"|IPR028823 "Sodium leak channel non-selective protein"	Congenital contractures of the limbs and face, hypotonia, and developmental delay, 616266|Hypotonia, infantile, with psychomotor retardation and characteristic facies 1, 615419
WBGene00003563	ncs-1	C44C1.3	X-1O23	ENSG00000107130	NCS1	6	Ensembl Compara 87-89|Homologene|InParanoid|OMA|OrthoInspector|OrthoMCL	SM00054	IPR002048 "EF-hand domain"|IPR011992 "EF-hand domain pair"|IPR028846 "Recoverin family"
WBGene00003567	ncx-2	C10G8.5	V-4M13	ENSG00000100678	SLC8A3	6	Ensembl Compara 87-89|Homologene|InParanoid|OMA|OrthoInspector|OrthoMCL	SM00237	IPR003644 "Na-Ca exchanger/integrin-beta4"|IPR004836 "Sodium/calcium exchanger protein"|IPR004837 "Sodium/calcium exchanger membrane region"|IPR032452 "Sodium/calcium exchanger domain, C-terminal extension"
WBGene00003579	ndx-2	W02G9.1	V-2M18	ENSG00000165609	NUDT5	6	Ensembl Compara 87-89|Homologene|InParanoid|OMA|OrthoInspector|OrthoMCL		IPR000086 "NUDIX hydrolase domain"|IPR015797 "NUDIX hydrolase domain-like"|IPR020476 "NUDIX hydrolase"
WBGene00003580	ndx-3	Y38A8.1	II-4K13	ENSG00000167799	NUDT8	6	Ensembl Compara 87-89|Homologene|InParanoid|OMA|OrthoInspector|OrthoMCL		IPR000086 "NUDIX hydrolase domain"|IPR015797 "NUDIX hydrolase domain-like"
WBGene00003583	ndx-6	EEED8.8	II-4K02	ENSG00000170502	NUDT9	6	Ensembl Compara 87-89|Homologene|InParanoid|OMA|OrthoInspector|OrthoMCL		IPR000086 "NUDIX hydrolase domain"|IPR015797 "NUDIX hydrolase domain-like"
WBGene00003584	ndx-7	C43E11.7	I-1J18	ENSG00000213965	NUDT19	6	Ensembl Compara 87-89|Homologene|InParanoid|OMA|OrthoInspector|OrthoMCL		IPR000086 "NUDIX hydrolase domain"|IPR015797 "NUDIX hydrolase domain-like"
WBGene00003587	ned-8	F45H11.2	I-5O03	ENSG00000129559	NEDD8	6	Ensembl Compara 87-89|Homologene|InParanoid|OMA|OrthoInspector|OrthoMCL	SM00213	IPR000626 "Ubiquitin domain"|IPR019956 "Ubiquitin"|IPR029071 "Ubiquitin-related domain"
WBGene00003589	nex-2	T07C4.9	III-5F15|III-8O24	ENSG00000138279	ANXA7	6	Ensembl Compara 87-89|Homologene|InParanoid|OMA|OrthoInspector|OrthoMCL	SM00335	IPR001464 "Annexin"|IPR018502 "Annexin repeat"
WBGene00003596	ngp-1	T19A6.2	I-4I17	ENSG00000134697	GNL2	6	Ensembl Compara 87-89|Homologene|InParanoid|OMA|OrthoInspector|OrthoMCL		IPR006073 "GTP binding domain"|IPR012971 "Nucleolar GTP-binding protein 2, N-terminal domain"|IPR023179 "GTP-binding protein, orthogonal bundle domain"|IPR024929 "Nucleolar GTP-binding protein 2"|IPR027417 "P-loop containing nucleoside triphosphate hydrolase"
WBGene00003654	nhr-64	C45E1.1	I-1M14	ENSG00000164749	HNF4G	6	Ensembl Compara 87-89|Homologene|InParanoid|OMA|OrthoInspector|OrthoMCL	SM00399|SM00430	IPR000003 "Retinoid X receptor/HNF4"|IPR000536 "Nuclear hormone receptor, ligand-binding domain"|IPR001628 "Zinc finger, nuclear hormone receptor-type"|IPR001723 "Nuclear hormone receptor"|IPR013088 "Zinc finger, NHR/GATA-type"
WBGene00003733	nhx-5	F57C7.2	X-5K15	ENSG00000198689	SLC9A6	6	Ensembl Compara 87-89|Homologene|InParanoid|OMA|OrthoInspector|OrthoMCL		IPR002090 "Na+/H+ exchanger, isoform 6 (NHE6)"|IPR004709 "Na+/H+ exchanger"|IPR006153 "Cation/H+ exchanger"|IPR018422 "Cation/H+ exchanger, CPA1 family"	Mental retardation, X-linked syndromic, Christianson type, 300243
WBGene00003735	nhx-8	Y18D10A.6	I-6D15	ENSG00000197818	SLC9A8	6	Ensembl Compara 87-89|Homologene|InParanoid|OMA|OrthoInspector|OrthoMCL		IPR004709 "Na+/H+ exchanger"|IPR006153 "Cation/H+ exchanger"|IPR018409 "Na+/H+ exchanger, isoform 8"|IPR018422 "Cation/H+ exchanger, CPA1 family"
WBGene00003776	nmy-1	F52B10.1	X-2C09	ENSG00000133026	MYH10	6	Ensembl Compara 87-89|Homologene|InParanoid|OMA|OrthoInspector|OrthoMCL	SM00015|SM00242	IPR001609 "Myosin head, motor domain"|IPR002928 "Myosin tail"|IPR004009 "Myosin, N-terminal, SH3-like"|IPR027401 "Myosin-like IQ motif-containing domain"|IPR027417 "P-loop containing nucleoside triphosphate hydrolase"
WBGene00003778	nnt-1	C15H9.1	X-3E20	ENSG00000112992	NNT	6	Ensembl Compara 87-89|Homologene|InParanoid|OMA|OrthoInspector|OrthoMCL	SM01002|SM01003	IPR007698 "Alanine dehydrogenase/pyridine nucleotide transhydrogenase, NAD(H)-binding domain"|IPR007886 "Alanine dehydrogenase/pyridine nucleotide transhydrogenase, N-terminal"|IPR012136 "NADP transhydrogenase, beta subunit"|IPR016040 "NAD(P)-binding domain"|IPR024605 "NAD(P) transhydrogenase, alpha subunit, C-terminal"|IPR026255 "NAD(P) transhydrogenase, alpha subunit"|IPR029035 "DHS-like NAD/FA…	Glucocorticoid deficiency 4, with or without mineralocorticoid deficiency, 614736
WBGene00003788	npp-2	T01G9.4	I-4G03	ENSG00000125450	NUP85	6	Ensembl Compara 87-89|Homologene|InParanoid|OMA|OrthoInspector|OrthoMCL		IPR011502 "Nucleoporin Nup85-like"
WBGene00003794	npp-8	Y41D4B.19	IV-8B19|IV-8D03|IV-8D05|IV-8D13|IV-8D19	ENSG00000113569	NUP155	6	Ensembl Compara 87-89|Homologene|InParanoid|OMA|OrthoInspector|OrthoMCL		IPR004870 "Nucleoporin, Nup155-like"|IPR007187 "Nucleoporin, Nup133/Nup155-like, C-terminal"|IPR014908 "Nucleoporin, Nup133/Nup155-like, N-terminal"|IPR017986 "WD40-repeat-containing domain"	Atrial fibrillation 15, 615770
WBGene00003798	npp-12	T23H2.1	I-3G15	ENSG00000132182	NUP210	6	Ensembl Compara 87-89|Homologene|InParanoid|OMA|OrthoInspector|OrthoMCL	SM00635	IPR003343 "Bacterial Ig-like, group 2"|IPR008964 "Invasin/intimin cell-adhesion fragments"
WBGene00003803	rae-1	F10G8.3	I-5C15	ENSG00000101146	RAE1	6	Ensembl Compara 87-89|Homologene|InParanoid|OMA|OrthoInspector|OrthoMCL	SM00320	IPR001680 "WD40 repeat"|IPR015943 "WD40/YVTN repeat-like-containing domain"|IPR017986 "WD40-repeat-containing domain"|IPR020472 "G-protein beta WD-40 repeat"
WBGene00003804	npp-18	Y43F4B.4	III-6H19	ENSG00000085415	SEH1L	6	Ensembl Compara 87-89|Homologene|InParanoid|OMA|OrthoInspector|OrthoMCL	SM00320	IPR001680 "WD40 repeat"|IPR015943 "WD40/YVTN repeat-like-containing domain"|IPR017986 "WD40-repeat-containing domain"
WBGene00003806	npp-20	Y77E11A.13	IV-1D15	ENSG00000157020	SEC13	6	Ensembl Compara 87-89|Homologene|InParanoid|OMA|OrthoInspector|OrthoMCL	SM00320	IPR001680 "WD40 repeat"|IPR015943 "WD40/YVTN repeat-like-containing domain"|IPR017986 "WD40-repeat-containing domain"
WBGene00003815	nars-1	F22D6.3	I-3O22	ENSG00000134440	NARS	6	Ensembl Compara 87-89|Homologene|InParanoid|OMA|OrthoInspector|OrthoMCL		IPR002312 "Aspartyl/Asparaginyl-tRNA synthetase, class IIb"|IPR004364 "Aminoacyl-tRNA synthetase, class II (D/K/N)"|IPR004365 "OB-fold nucleic acid binding domain, AA-tRNA synthetase-type"|IPR004522 "Asparagine-tRNA ligase"|IPR012340 "Nucleic acid-binding, OB-fold"|IPR018150 "Aminoacyl-tRNA synthetase, class II (D/K/N)-like"
WBGene00003816	asns-1	F25G6.6	V-6I17	ENSG00000070669	ASNS	6	Ensembl Compara 87-89|Homologene|InParanoid|OMA|OrthoInspector|OrthoMCL		IPR001962 "Asparagine synthase"|IPR014729 "Rossmann-like alpha/beta/alpha sandwich fold"|IPR017932 "Glutamine amidotransferase type 2 domain"|IPR029055 "Nucleophile aminohydrolases, N-terminal"	Asparagine synthetase deficiency, 615574
WBGene00003829	nud-1	F53A2.4	III-6J11	ENSG00000090273	NUDC	6	Ensembl Compara 87-89|Homologene|InParanoid|OMA|OrthoInspector|OrthoMCL		IPR007052 "CS domain"|IPR008978 "HSP20-like chaperone"|IPR025934 "NudC N-terminal domain"
WBGene00003831	nuo-1	C09H10.3	II-7L05	ENSG00000167792	NDUFV1	6	Ensembl Compara 87-89|Homologene|InParanoid|OMA|OrthoInspector|OrthoMCL	SM00928	IPR011537 "NADH ubiquinone oxidoreductase, F subunit"|IPR011538 "NADH-ubiquinone oxidoreductase 51 kDa subunit, FMN-binding domain"|IPR019554 "Soluble ligand binding domain"|IPR019575 "NADH-ubiquinone oxidoreductase 51 kDa subunit, iron-sulphur binding domain"	Mitochondrial complex I deficiency, 252010
WBGene00003834	nxf-1	C15H11.3	V-14E21	ENSG00000162231	NXF1	6	Ensembl Compara 87-89|Homologene|InParanoid|OMA|OrthoInspector|OrthoMCL	SM00804	IPR005637 "TAP C-terminal (TAP-C) domain"|IPR009060 "UBA-like"|IPR012677 "Nucleotide-binding alpha-beta plait domain"|IPR015245 "Nuclear RNA export factor Tap, RNA-binding domain"|IPR030217 "Nuclear RNA export factor"|IPR032675 "Leucine-rich repeat domain, L domain-like"|IPR032710 "NTF2-like domain"
WBGene00003844	odc-1	K11C4.4	V-15C06	ENSG00000115758	ODC1	6	Ensembl Compara 87-89|Homologene|InParanoid|OMA|OrthoInspector|OrthoMCL		IPR000183 "Ornithine/DAP/Arg decarboxylase"|IPR002433 "Ornithine decarboxylase"|IPR009006 "Alanine racemase/group IV decarboxylase, C-terminal"|IPR022643 "Orn/DAP/Arg decarboxylase 2, C-terminal"|IPR022644 "Orn/DAP/Arg decarboxylase 2, N-terminal"|IPR029066 "PLP-binding barrel"	Colonic adenoma recurrence, reduced risk of, 114500
WBGene00003858	ogt-1	K04G7.3	III-3D24	ENSG00000147162	OGT	6	Ensembl Compara 87-89|Homologene|InParanoid|OMA|OrthoInspector|OrthoMCL	SM00028	IPR001440 "Tetratricopeptide repeat 1"|IPR011990 "Tetratricopeptide-like helical domain"|IPR019734 "Tetratricopeptide repeat"|IPR029489 "O-GlcNAc transferase, C-terminal"	Mental retardation, X-linked 106, 300997
WBGene00003870	ooc-5	C18E9.11	II-10K05	ENSG00000136816	TOR1B	6	Ensembl Compara 87-89|Homologene|InParanoid|OMA|OrthoInspector|OrthoMCL		IPR001270 "ClpA/B family"|IPR010448 "Torsin"|IPR017378 "Torsin 1/2"|IPR027417 "P-loop containing nucleoside triphosphate hydrolase"
WBGene00006597	tor-1	Y37A1B.12	IV-10C24	ENSG00000136816	TOR1B	6	Ensembl Compara 87-89|Homologene|InParanoid|OMA|OrthoInspector|OrthoMCL		IPR001270 "ClpA/B family"|IPR003593 "AAA+ ATPase domain"|IPR010448 "Torsin"|IPR017378 "Torsin 1/2"|IPR027417 "P-loop containing nucleoside triphosphate hydrolase"
WBGene00006598	tor-2	Y37A1B.13	IV-7K20	ENSG00000136816	TOR1B	6	Ensembl Compara 87-89|Homologene|InParanoid|OMA|OrthoInspector|OrthoMCL		IPR001270 "ClpA/B family"|IPR010448 "Torsin"|IPR017378 "Torsin 1/2"|IPR027417 "P-loop containing nucleoside triphosphate hydrolase"
WBGene00003883	osm-1	T27B1.1	X-7M24	ENSG00000138002	IFT172	6	Ensembl Compara 87-89|Homologene|InParanoid|OMA|OrthoInspector|OrthoMCL	SM00320	IPR001680 "WD40 repeat"|IPR011990 "Tetratricopeptide-like helical domain"|IPR015943 "WD40/YVTN repeat-like-containing domain"|IPR017986 "WD40-repeat-containing domain"	Retinitis pigmentosa 71, 616394|Short-rib thoracic dysplasia 10 with or without polydactyly, 615630
WBGene00003884	osm-3	M02B7.3	IV-1N20	ENSG00000117245	KIF17	6	Ensembl Compara 87-89|Homologene|InParanoid|OMA|OrthoInspector|OrthoMCL	SM00129	IPR001752 "Kinesin motor domain"|IPR027417 "P-loop containing nucleoside triphosphate hydrolase"|IPR027640 "Kinesin-like protein"
WBGene00003885	osm-5	Y41G9A.1		ENSG00000032742	IFT88	6	Ensembl Compara 87-89|Homologene|InParanoid|OMA|OrthoInspector|OrthoMCL	SM00028|SM00671	IPR011990 "Tetratricopeptide-like helical domain"|IPR019734 "Tetratricopeptide repeat"
WBGene00003886	osm-6	R31.3	V-8C13	ENSG00000101052	IFT52	6	Ensembl Compara 87-89|Homologene|InParanoid|OMA|OrthoInspector|OrthoMCL		IPR019196 "ABC-type uncharacterised transport system"|IPR029062 "Class I glutamine amidotransferase-like"	Short-rib thoracic dysplasia 16 with or without polydactyly, 617102
WBGene00003892	osm-12	Y75B8A.12	III-8G17	ENSG00000138686	BBS7	6	Ensembl Compara 87-89|Homologene|InParanoid|OMA|OrthoInspector|OrthoMCL		IPR011047 "Quinoprotein alcohol dehydrogenase-like superfamily"|IPR016575 "Bardet-Biedl syndrome 7 protein"|IPR027295 "Quinoprotein alcohol dehydrogenase-like domain"	Bardet-Biedl syndrome 7, 615984
WBGene00003898	oxi-1	Y39A1C.2	III-5D14	ENSG00000151148	UBE3B	6	Ensembl Compara 87-89|Homologene|InParanoid|OMA|OrthoInspector|OrthoMCL	SM00015|SM00119	IPR000569 "HECT domain"	Kaufman oculocerebrofacial syndrome, 244450
WBGene00003901	paa-1	F48E8.5	III-2J10	ENSG00000105568	PPP2R1A	6	Ensembl Compara 87-89|Homologene|InParanoid|OMA|OrthoInspector|OrthoMCL		IPR000357 "HEAT repeat"|IPR011989 "Armadillo-like helical"|IPR016024 "Armadillo-type fold"	Mental retardation, autosomal dominant 36, 616362
WBGene00003906	paf-1	W03G9.6	I-2O19	ENSG00000158006	PAFAH2	6	Ensembl Compara 87-89|Homologene|InParanoid|OMA|OrthoInspector|OrthoMCL		IPR005065 "Platelet-activating factor acetylhydrolase"|IPR016715 "Platelet-activating factor acetylhydrolase, eucaryote"|IPR029058 "Alpha/Beta hydrolase fold"
WBGene00003907	paf-2	C52B9.7	X-2J01	ENSG00000158006	PAFAH2	6	Ensembl Compara 87-89|Homologene|InParanoid|OMA|OrthoInspector|OrthoMCL		IPR005065 "Platelet-activating factor acetylhydrolase"|IPR016715 "Platelet-activating factor acetylhydrolase, eucaryote"|IPR029058 "Alpha/Beta hydrolase fold"
WBGene00003911	pak-1	C09B8.7	X-3E04	ENSG00000149269	PAK1	6	Ensembl Compara 87-89|Homologene|InParanoid|OMA|OrthoInspector|OrthoMCL	SM00220|SM00285	IPR000095 "CRIB domain"|IPR000719 "Protein kinase domain"|IPR011009 "Protein kinase-like domain"
WBGene00003914	pam-1	F49E8.3	IV-3F12	ENSG00000141279	NPEPPS	6	Ensembl Compara 87-89|Homologene|InParanoid|OMA|OrthoInspector|OrthoMCL		IPR001930 "Peptidase M1, alanine aminopeptidase/leukotriene A4 hydrolase"|IPR014782 "Peptidase M1, membrane alanine aminopeptidase, N-terminal"|IPR024571 "ERAP1-like C-terminal domain"
WBGene00003916	par-1	H39E23.1	V-9E06|V-9E16	ENSG00000075413	MARK3	6	Ensembl Compara 87-89|Homologene|InParanoid|OMA|OrthoInspector|OrthoMCL	SM00165|SM00220	IPR000719 "Protein kinase domain"|IPR001772 "Kinase associated domain 1 (KA1)"|IPR011009 "Protein kinase-like domain"|IPR028375 "KA1 domain/Ssp2, C-terminal"|IPR033624 "Serine/threonine-protein kinase MARK/par1"
WBGene00003921	par-6	T26E3.3	I-6M10	ENSG00000178184	PARD6G	6	Ensembl Compara 87-89|Homologene|InParanoid|OMA|OrthoInspector|OrthoMCL	SM00228|SM00666	IPR000270 "PB1 domain"|IPR001478 "PDZ domain"
WBGene00003922	pas-1	C15H11.7	V-15C07	ENSG00000100902	PSMA6	6	Ensembl Compara 87-89|Homologene|InParanoid|OMA|OrthoInspector|OrthoMCL	SM00948	IPR000426 "Proteasome alpha-subunit, N-terminal domain"|IPR001353 "Proteasome, subunit alpha/beta"|IPR029055 "Nucleophile aminohydrolases, N-terminal"	Myocardial infarction, susceptibility to, 608446
WBGene00003924	pas-3	Y110A7A.14	I-2C22|I-2E06	ENSG00000041357	PSMA4	6	Ensembl Compara 87-89|Homologene|InParanoid|OMA|OrthoInspector|OrthoMCL	SM00948	IPR000426 "Proteasome alpha-subunit, N-terminal domain"|IPR001353 "Proteasome, subunit alpha/beta"|IPR029055 "Nucleophile aminohydrolases, N-terminal"
WBGene00003925	pas-4	C36B1.4	I-4G04	ENSG00000101182	PSMA7	6	Ensembl Compara 87-89|Homologene|InParanoid|OMA|OrthoInspector|OrthoMCL	SM00948	IPR000426 "Proteasome alpha-subunit, N-terminal domain"|IPR001353 "Proteasome, subunit alpha/beta"|IPR029055 "Nucleophile aminohydrolases, N-terminal"
WBGene00003926	pas-5	F25H2.9	I-5G02	ENSG00000143106	PSMA5	6	Ensembl Compara 87-89|Homologene|InParanoid|OMA|OrthoInspector|OrthoMCL	SM00948	IPR000426 "Proteasome alpha-subunit, N-terminal domain"|IPR001353 "Proteasome, subunit alpha/beta"|IPR029055 "Nucleophile aminohydrolases, N-terminal"
WBGene00003927	pas-6	CD4.6	V-4G08	ENSG00000129084	PSMA1	6	Ensembl Compara 87-89|Homologene|InParanoid|OMA|OrthoInspector|OrthoMCL	SM00948	IPR000426 "Proteasome alpha-subunit, N-terminal domain"|IPR001353 "Proteasome, subunit alpha/beta"|IPR029055 "Nucleophile aminohydrolases, N-terminal"
WBGene00003928	pas-7	ZK945.2	II-10K06	ENSG00000100567	PSMA3	6	Ensembl Compara 87-89|Homologene|InParanoid|OMA|OrthoInspector|OrthoMCL	SM00948	IPR000426 "Proteasome alpha-subunit, N-terminal domain"|IPR001353 "Proteasome, subunit alpha/beta"|IPR029055 "Nucleophile aminohydrolases, N-terminal"
WBGene00003929	pat-2	F54F2.1	III-4P15	ENSG00000077943	ITGA8	6	Ensembl Compara 87-89|Homologene|InParanoid|OMA|OrthoInspector|OrthoMCL	SM00191	IPR000413 "Integrin alpha chain"|IPR013517 "FG-GAP repeat"|IPR013519 "Integrin alpha beta-propellor"|IPR013649 "Integrin alpha-2"|IPR018184 "Integrin alpha chain, C-terminal cytoplasmic region, conserved site"|IPR032695 "Integrin domain"	Renal hypodysplasia/aplasia 1, 191830
WBGene00003932	pat-6	T21D12.4	IV-1E21	ENSG00000197702	PARVA	6	Ensembl Compara 87-89|Homologene|InParanoid|OMA|OrthoInspector|OrthoMCL	SM00033	IPR001715 "Calponin homology domain"|IPR028433 "Parvin"
WBGene00014109	chpf-1	ZK856.8	V-7G19	ENSG00000187446	CHP1	6	Ensembl Compara 87-89|Homologene|InParanoid|OMA|OrthoInspector|OrthoMCL	SM00054	IPR002048 "EF-hand domain"|IPR011992 "EF-hand domain pair"
WBGene00003950	pbs-4	T20F5.2	I-1N17	ENSG00000126067	PSMB2	6	Ensembl Compara 87-89|Homologene|InParanoid|OMA|OrthoInspector|OrthoMCL		IPR001353 "Proteasome, subunit alpha/beta"|IPR029055 "Nucleophile aminohydrolases, N-terminal"
WBGene00003951	pbs-5	K05C4.1	I-7E10	ENSG00000100804	PSMB5	6	Ensembl Compara 87-89|Homologene|InParanoid|OMA|OrthoInspector|OrthoMCL		IPR000243 "Peptidase T1A, proteasome beta-subunit"|IPR001353 "Proteasome, subunit alpha/beta"|IPR029055 "Nucleophile aminohydrolases, N-terminal"
WBGene00003952	pbs-6	C02F5.9	III-4K04	ENSG00000008018	PSMB1	6	Ensembl Compara 87-89|Homologene|InParanoid|OMA|OrthoInspector|OrthoMCL		IPR001353 "Proteasome, subunit alpha/beta"|IPR029055 "Nucleophile aminohydrolases, N-terminal"
WBGene00003954	pcm-1	C10F3.5		ENSG00000120265	PCMT1	6	Ensembl Compara 87-89|Homologene|InParanoid|OMA|OrthoInspector|OrthoMCL		IPR000682 "Protein-L-isoaspartate(D-aspartate) O-methyltransferase"|IPR029063 "S-adenosyl-L-methionine-dependent methyltransferase"
WBGene00003955	pcn-1	W03D2.4	IV-9L10	ENSG00000132646	PCNA	6	Ensembl Compara 87-89|Homologene|InParanoid|OMA|OrthoInspector|OrthoMCL		IPR000730 "Proliferating cell nuclear antigen, PCNA"|IPR022648 "Proliferating cell nuclear antigen, PCNA, N-terminal"|IPR022649 "Proliferating cell nuclear antigen, PCNA, C-terminal"	Ataxia-telangiectasia-like disorder 2, 615919
WBGene00022801	pcp-5	ZK688.6	III-4M03	ENSG00000137509	PRCP	6	Ensembl Compara 87-89|Homologene|InParanoid|OMA|OrthoInspector|OrthoMCL		IPR008758 "Peptidase S28"|IPR029058 "Alpha/Beta hydrolase fold"
WBGene00003961	pct-1	C07G1.3	IV-4K13	ENSG00000059758	CDK17	6	Ensembl Compara 87-89|Homologene|InParanoid|OMA|OrthoInspector|OrthoMCL	SM00220	IPR000719 "Protein kinase domain"|IPR011009 "Protein kinase-like domain"
WBGene00003963	pdi-2	C07A12.4	X-2P15	ENSG00000185624	P4HB	6	Ensembl Compara 87-89|Homologene|InParanoid|OMA|OrthoInspector|OrthoMCL		IPR005788 "Disulphide isomerase"|IPR005792 "Protein disulphide isomerase"|IPR012336 "Thioredoxin-like fold"|IPR013766 "Thioredoxin domain"	Cole-Carpenter syndrome 1, 112240
WBGene00003964	pdi-3	H06O01.1	I-3M18	ENSG00000167004	PDIA3	6	Ensembl Compara 87-89|Homologene|InParanoid|OMA|OrthoInspector|OrthoMCL		IPR005788 "Disulphide isomerase"|IPR005792 "Protein disulphide isomerase"|IPR012336 "Thioredoxin-like fold"|IPR013766 "Thioredoxin domain"
WBGene00003965	pdk-1	H42K12.1	X-1I14	ENSG00000140992	PDPK1	6	Ensembl Compara 87-89|Homologene|InParanoid|OMA|OrthoInspector|OrthoMCL	SM00220	IPR000719 "Protein kinase domain"|IPR001849 "Pleckstrin homology domain"|IPR011009 "Protein kinase-like domain"|IPR011993 "PH domain-like"
WBGene00003967	pdr-1	K08E3.7		ENSG00000185345	PRKN	6	Ensembl Compara 87-89|Homologene|InParanoid|OMA|OrthoInspector|OrthoMCL	SM00213|SM00647	IPR002867 "IBR domain"|IPR003977 "E3 ubiquitin-protein ligase parkin"|IPR029071 "Ubiquitin-related domain"|IPR031127 "E3 ubiquitin ligase RBR family"	Adenocarcinoma of lung, somatic, 211980|Adenocarcinoma, ovarian, somatic, 167000|Leprosy, susceptibility to, 607572|Parkinson disease, juvenile, type 2, 600116
WBGene00003969	pef-1	F23H11.8	III-1G12	ENSG00000086717	PPEF1	6	Ensembl Compara 87-89|Homologene|InParanoid|OMA|OrthoInspector|OrthoMCL	SM00015|SM00054|SM00156	IPR002048 "EF-hand domain"|IPR004843 "Calcineurin-like phosphoesterase domain, apaH type"|IPR006186 "Serine/threonine-specific protein phosphatase/bis(5-nucleosyl)-tetraphosphatase"|IPR011992 "EF-hand domain pair"|IPR012008 "Serine/threonine-protein phosphatase with EF-hands"|IPR013235 "PPP domain"|IPR029052 "Metallo-dependent phosphatase-like"
WBGene00003975	pen-2	T28D6.9	III-6A09	ENSG00000205155	PSENEN	6	Ensembl Compara 87-89|Homologene|InParanoid|OMA|OrthoInspector|OrthoMCL		IPR019379 "Gamma-secretase aspartyl protease complex, presenilin enhancer-2 subunit"	Acne inversa, familial, 2, with or without Dowling-Degos disease, 613736
WBGene00003980	pes-7	F09C3.1	I-7K17	ENSG00000183856	IQGAP3	6	Ensembl Compara 87-89|Homologene|InParanoid|OMA|OrthoInspector|OrthoMCL	SM00015|SM00033|SM00323	IPR000593 "RasGAP protein, C-terminal"|IPR001715 "Calponin homology domain"|IPR001936 "Ras GTPase-activating protein"|IPR008936 "Rho GTPase activation protein"
WBGene00022176		Y71H2AM.11	III-9B16	ENSG00000133313	CNDP2	6	Ensembl Compara 87-89|Homologene|InParanoid|OMA|OrthoInspector|OrthoMCL		IPR002933 "Peptidase M20"|IPR011650 "Peptidase M20, dimerisation domain"|IPR017153 "Cytosolic nonspecific dipeptidase/DUG1"
WBGene00004014	phb-1	Y37E3.9	I-9G12	ENSG00000167085	PHB	6	Ensembl Compara 87-89|Homologene|InParanoid|OMA|OrthoInspector|OrthoMCL	SM00244	IPR000163 "Prohibitin"|IPR001107 "Band 7 domain"	Breast cancer, susceptibility to, 114480
WBGene00004015	phb-2	T24H7.1	II-4J17	ENSG00000215021	PHB2	6	Ensembl Compara 87-89|Homologene|InParanoid|OMA|OrthoInspector|OrthoMCL	SM00244	IPR000163 "Prohibitin"|IPR001107 "Band 7 domain"
WBGene00004016	phf-5	Y54F10BM.14		ENSG00000100410	PHF5A	6	Ensembl Compara 87-89|Homologene|InParanoid|OMA|OrthoInspector|OrthoMCL		IPR005345 "PHF5-like"
WBGene00006826	unc-97	F14D12.2	X-3I11	ENSG00000169756	LIMS1	6	Ensembl Compara 87-89|Homologene|InParanoid|OMA|OrthoInspector|OrthoMCL	SM00132	IPR001781 "Zinc finger, LIM-type"|IPR017351 "LIM and senescent cell antigen-like-containing domain protein 1"
WBGene00004033	pkc-2	E01H11.1	X-4N23	ENSG00000154229	PRKCA	6	Ensembl Compara 87-89|Homologene|InParanoid|OMA|OrthoInspector|OrthoMCL	SM00109|SM00133|SM00220|SM00239	IPR000008 "C2 domain"|IPR000719 "Protein kinase domain"|IPR000961 "AGC-kinase, C-terminal"|IPR002219 "Protein kinase C-like, phorbol ester/diacylglycerol-binding domain"|IPR011009 "Protein kinase-like domain"|IPR014375 "Protein kinase C, alpha/beta/gamma types"|IPR017892 "Protein kinase, C-terminal"|IPR020454 "Diacylglycerol/phorbol-ester binding"	Pituitary tumor, invasive
WBGene00004034	pkc-3	F09E5.1	II-4G10	ENSG00000163558	PRKCI	6	Ensembl Compara 87-89|Homologene|InParanoid|OMA|OrthoInspector|OrthoMCL	SM00109|SM00133|SM00220|SM00666	IPR000270 "PB1 domain"|IPR000719 "Protein kinase domain"|IPR000961 "AGC-kinase, C-terminal"|IPR002219 "Protein kinase C-like, phorbol ester/diacylglycerol-binding domain"|IPR011009 "Protein kinase-like domain"|IPR012233 "Protein kinase C"|IPR017892 "Protein kinase, C-terminal"|IPR020454 "Diacylglycerol/phorbol-ester binding"
WBGene00004035	pkd-2	Y73F8A.1	IV-7B02|IV-7P23	ENSG00000118762	PKD2	6	Ensembl Compara 87-89|Homologene|InParanoid|OMA|OrthoInspector|OrthoMCL		IPR003915 "Polycystic kidney disease type 2 protein"|IPR013122 "Polycystin cation channel, PKD1/PKD2"	Polycystic kidney disease 2, 613095
WBGene00004036	plc-1	F31B12.1	X-5A04	ENSG00000138193	PLCE1	6	Ensembl Compara 87-89|Homologene|InParanoid|OMA|OrthoInspector|OrthoMCL	SM00147|SM00148|SM00149|SM00239|SM00314	IPR000008 "C2 domain"|IPR000159 "Ras-associating (RA) domain"|IPR000909 "Phosphatidylinositol-specific phospholipase C, X domain"|IPR001192 "Phosphoinositide phospholipase C family"|IPR001711 "Phospholipase C, phosphatidylinositol-specific, Y domain"|IPR001895 "Ras guanine-nucleotide exchange factors catalytic domain"|IPR011992 "EF-hand domain pair"|IPR015359 "Phosphoinositide-specific phospholip…	Nephrotic syndrome, type 3, 610725
WBGene00004039	plc-4	R05G6.8	IV-3F02	ENSG00000161714	PLCD3	6	Ensembl Compara 87-89|Homologene|InParanoid|OMA|OrthoInspector|OrthoMCL	SM00148|SM00149|SM00233|SM00239	IPR000008 "C2 domain"|IPR000909 "Phosphatidylinositol-specific phospholipase C, X domain"|IPR001192 "Phosphoinositide phospholipase C family"|IPR001711 "Phospholipase C, phosphatidylinositol-specific, Y domain"|IPR011992 "EF-hand domain pair"|IPR011993 "PH domain-like"|IPR017946 "PLC-like phosphodiesterase, TIM beta/alpha-barrel domain"
WBGene00004040	pld-1	C04G6.3	IV-5E16|IV-5E18|IV-5E22	ENSG00000075651	PLD1	6	Ensembl Compara 87-89|Homologene|InParanoid|OMA|OrthoInspector|OrthoMCL	SM00155|SM00233|SM00312	IPR001683 "Phox homologous domain"|IPR001736 "Phospholipase D/Transphosphatidylase"|IPR001849 "Pleckstrin homology domain"|IPR011993 "PH domain-like"|IPR015679 "Phospholipase D family"|IPR016555 "Phospholipase D1/D2"	Cardiac valvular defect, developmental, 212093
WBGene00004042	plk-1	C14B9.4	III-4C10|III-4E08	ENSG00000166851	PLK1	6	Ensembl Compara 87-89|Homologene|InParanoid|OMA|OrthoInspector|OrthoMCL	SM00220	IPR000719 "Protein kinase domain"|IPR000959 "POLO box domain"|IPR011009 "Protein kinase-like domain"
WBGene00004043	plk-2	Y71F9B.7	I-9A21	ENSG00000166851	PLK1	6	Ensembl Compara 87-89|Homologene|InParanoid|OMA|OrthoInspector|OrthoMCL	SM00220	IPR000719 "Protein kinase domain"|IPR000959 "POLO box domain"|IPR011009 "Protein kinase-like domain"
WBGene00004045	pll-1	K10F12.3	III-1I15|III-1I17	ENSG00000154822	PLCL2	6	Ensembl Compara 87-89|Homologene|InParanoid|OMA|OrthoInspector|OrthoMCL	SM00148|SM00149|SM00233|SM00239	IPR000008 "C2 domain"|IPR000909 "Phosphatidylinositol-specific phospholipase C, X domain"|IPR001192 "Phosphoinositide phospholipase C family"|IPR001711 "Phospholipase C, phosphatidylinositol-specific, Y domain"|IPR001849 "Pleckstrin homology domain"|IPR011992 "EF-hand domain pair"|IPR011993 "PH domain-like"|IPR015359 "Phosphoinositide-specific phospholipase C, EF-hand-like domain"|IPR017946 "PLC-…
WBGene00004047	plx-1	Y55F3AL.1	IV-8L03	ENSG00000076356	PLXNA2	6	Ensembl Compara 87-89|Homologene|InParanoid|OMA|OrthoInspector|OrthoMCL	SM00423|SM00429|SM00630	IPR001627 "Sema domain"|IPR002165 "Plexin repeat"|IPR002909 "IPT domain"|IPR008936 "Rho GTPase activation protein"|IPR013548 "Plexin, cytoplasmic RasGAP domain"|IPR013783 "Immunoglobulin-like fold"|IPR014756 "Immunoglobulin E-set"|IPR015943 "WD40/YVTN repeat-like-containing domain"|IPR016201 "Plexin-like fold"|IPR031148 "Plexin family"
WBGene00004049	parp-1	Y71F9AL.18	I-8C17	ENSG00000143799	PARP1	6	Ensembl Compara 87-89|Homologene|InParanoid|OMA|OrthoInspector|OrthoMCL	SM00292|SM00773|SM01335|SM01336	IPR001510 "Zinc finger, PARP-type"|IPR004102 "Poly(ADP-ribose) polymerase, regulatory domain"|IPR008893 "WGR domain"|IPR012317 "Poly(ADP-ribose) polymerase, catalytic domain"|IPR012982 "PADR1 domain"
WBGene00004059	pmp-2	C44B7.9	II-5C20	ENSG00000117528	ABCD3	6	Ensembl Compara 87-89|Homologene|InParanoid|OMA|OrthoInspector|OrthoMCL	SM00382	IPR003439 "ABC transporter-like"|IPR003593 "AAA+ ATPase domain"|IPR005283 "Peroxysomal long chain fatty acyl transporter"|IPR011527 "ABC transporter type 1, transmembrane domain"|IPR027417 "P-loop containing nucleoside triphosphate hydrolase"|IPR031241 "ATP-binding cassette sub-family D member 3"	Bile acid synthesis defect, congenital, 5, 616278
WBGene00004063	pmr-1	ZK256.1	I-9A22	ENSG00000017260	ATP2C1	6	Ensembl Compara 87-89|Homologene|InParanoid|OMA|OrthoInspector|OrthoMCL	SM00831	IPR001757 "P-type ATPase"|IPR004014 "Cation-transporting P-type ATPase, N-terminal"|IPR006068 "Cation-transporting P-type ATPase, C-terminal"|IPR006413 "P-type ATPase, subfamily IIA, PMR1-type"|IPR008250 "P-type ATPase, A domain"|IPR023214 "HAD-like domain"|IPR023298 "P-type ATPase, transmembrane domain"|IPR023299 "P-type ATPase, cytoplasmic domain N"	Hailey-Hailey disease, 169600
WBGene00004085	pph-4.1	Y75B8A.30	III-8I08	ENSG00000149923	PPP4C	6	Ensembl Compara 87-89|Homologene|InParanoid|OMA|OrthoInspector|OrthoMCL	SM00156	IPR004843 "Calcineurin-like phosphoesterase domain, apaH type"|IPR006186 "Serine/threonine-specific protein phosphatase/bis(5-nucleosyl)-tetraphosphatase"|IPR029052 "Metallo-dependent phosphatase-like"
WBGene00004087	ppk-1	F55A12.3	I-2K18	ENSG00000143398	PIP5K1A	6	Ensembl Compara 87-89|Homologene|InParanoid|OMA|OrthoInspector|OrthoMCL	SM00330	IPR002498 "Phosphatidylinositol-4-phosphate 5-kinase, core"|IPR023610 "Phosphatidylinositol-4-phosphate 5-kinase"|IPR027483 "Phosphatidylinositol-4-phosphate 5-kinase, C-terminal"|IPR027484 "Phosphatidylinositol-4-phosphate 5-kinase, N-terminal domain"
WBGene00004090	ppp-1	C15F1.4	II-5G10	ENSG00000070785	EIF2B3	6	Ensembl Compara 87-89|Homologene|InParanoid|OMA|OrthoInspector|OrthoMCL		IPR005835 "Nucleotidyl transferase domain"|IPR011004 "Trimeric LpxA-like"|IPR029044 "Nucleotide-diphospho-sugar transferases"	Leukoencephalopathy with vanishing white matter, 603896
WBGene00004092	ppt-1	F44C4.5	V-4J06	ENSG00000131238	PPT1	6	Ensembl Compara 87-89|Homologene|InParanoid|OMA|OrthoInspector|OrthoMCL		IPR002472 "Palmitoyl protein thioesterase"|IPR029058 "Alpha/Beta hydrolase fold"|IPR030294 "Palmitoyl-protein thioesterase 1"	Ceroid lipofuscinosis, neuronal, 1, 256730
WBGene00004101	hgrs-1	C07G1.5	IV-4K17	ENSG00000185359	HGS	6	Ensembl Compara 87-89|Homologene|InParanoid|OMA|OrthoInspector|OrthoMCL	SM00064|SM00288	IPR000306 "FYVE zinc finger"|IPR002014 "VHS domain"|IPR008942 "ENTH/VHS"|IPR011011 "Zinc finger, FYVE/PHD-type"|IPR013083 "Zinc finger, RING/FYVE/PHD-type"|IPR017073 "Ubiquitin binding protein, Hrs/VPS27"|IPR024641 "Hepatocyte growth factor-regulated tyrosine kinase substrate, helical domain"
WBGene00004109	stam-1	C34G6.7	I-2B14	ENSG00000136738	STAM	6	Ensembl Compara 87-89|Homologene|InParanoid|OMA|OrthoInspector|OrthoMCL	SM00288|SM00326	IPR001452 "SH3 domain"|IPR002014 "VHS domain"|IPR008942 "ENTH/VHS"
WBGene00004131	pqn-44	F55A12.9	I-2M06	ENSG00000183508	FAM46C	6	Ensembl Compara 87-89|Homologene|InParanoid|OMA|OrthoInspector|OrthoMCL	SM01153	IPR012937 "FAM46 family"
WBGene00004134	myrf-1	F59B10.1	II-7I04	ENSG00000166268	MYRFL	6	Ensembl Compara 87-89|Homologene|InParanoid|OMA|OrthoInspector|OrthoMCL		IPR008967 "p53-like transcription factor, DNA-binding"|IPR024061 "NDT80 DNA-binding domain"|IPR025719 "Myelin gene regulatory factor C-terminal domain 2"|IPR026932 "Myelin gene regulatory factor C-terminal domain 1"|IPR030392 "Intramolecular chaperone auto-processing domain"
WBGene00008999	myrf-2	F21A10.2	X-5A23|X-5C01	ENSG00000166268	MYRFL	6	Ensembl Compara 87-89|Homologene|InParanoid|OMA|OrthoInspector|OrthoMCL		IPR008967 "p53-like transcription factor, DNA-binding"|IPR024061 "NDT80 DNA-binding domain"|IPR025719 "Myelin gene regulatory factor C-terminal domain 2"|IPR026932 "Myelin gene regulatory factor C-terminal domain 1"|IPR030392 "Intramolecular chaperone auto-processing domain"
WBGene00004151	pqn-68	T16G1.10	V-8L05	ENSG00000125821	DTD1	6	Ensembl Compara 87-89|Homologene|InParanoid|OMA|OrthoInspector|OrthoMCL		IPR003732 "D-aminoacyl-tRNA deacylase DTD"|IPR023509 "D-Tyr tRNAtyr deacylase-like domain"
WBGene00004180	pri-1	F58A4.4	III-5K11	ENSG00000198056	PRIM1	6	Ensembl Compara 87-89|Homologene|InParanoid|OMA|OrthoInspector|OrthoMCL		IPR002755 "DNA primase, small subunit"|IPR014052 "DNA primase, small subunit, eukaryotic/archaeal"
WBGene00004184		T19D2.2	X-2B03	ENSG00000112245	PTP4A1	6	Ensembl Compara 87-89|Homologene|InParanoid|OMA|OrthoInspector|OrthoMCL	SM00404	IPR000242 "PTP type protein phosphatase"|IPR003595 "Protein-tyrosine phosphatase, catalytic"|IPR029021 "Protein-tyrosine phosphatase-like"
WBGene00004188	prp-21	W07E6.4	II-1A22	ENSG00000099995	SF3A1	6	Ensembl Compara 87-89|Homologene|InParanoid|OMA|OrthoInspector|OrthoMCL	SM00213|SM00648	IPR000061 "SWAP/Surp"|IPR000626 "Ubiquitin domain"|IPR022030 "Splicing factor 3A subunit 1"|IPR029071 "Ubiquitin-related domain"
WBGene00004190	pars-2	T27F6.5	I-6G08	ENSG00000162396	PARS2	6	Ensembl Compara 87-89|Homologene|InParanoid|OMA|OrthoInspector|OrthoMCL		IPR002314 "Aminoacyl-tRNA synthetase, class II (G/ P/ S/T)"|IPR002316 "Proline-tRNA ligase, class IIa"|IPR004154 "Anticodon-binding"|IPR004500 "Prolyl-tRNA synthetase, class IIa, bacterial-type"
WBGene00004194	prx-5	C34C6.6	II-6G16	ENSG00000139197	PEX5	6	Ensembl Compara 87-89|Homologene|InParanoid|OMA|OrthoInspector|OrthoMCL	SM00028	IPR011990 "Tetratricopeptide-like helical domain"|IPR019734 "Tetratricopeptide repeat"|IPR024111 "Peroxisomal targeting signal 1 receptor family"	Peroxisome biogenesis disorder 2A (Zellweger), 214110|Peroxisome biogenesis disorder 2B, 202370|Rhizomelic chondrodysplasia punctata, type 5, 616716
WBGene00004197	prx-12	F08B12.2	X-5B05	ENSG00000108733	PEX12	6	Ensembl Compara 87-89|Homologene|InParanoid|OMA|OrthoInspector|OrthoMCL		IPR001841 "Zinc finger, RING-type"|IPR006845 "Pex, N-terminal"|IPR013083 "Zinc finger, RING/FYVE/PHD-type"|IPR017375 "Peroxisome assembly protein 12"	Peroxisome biogenesis disorder 3A (Zellweger), 614859|Peroxisome biogenesis disorder 3B, 266510
WBGene00004198	prx-13	F32A5.6	II-5D17	ENSG00000162928	PEX13	6	Ensembl Compara 87-89|Homologene|InParanoid|OMA|OrthoInspector|OrthoMCL	SM00326	IPR001452 "SH3 domain"|IPR007223 "Peroxin 13, N-terminal"	Peroxisome biogenesis disorder 11A (Zellweger), 614883|Peroxisome biogenesis disorder 11B, 614885
WBGene00004204	swsn-4	F01G4.1	IV-5N06	ENSG00000080503	SMARCA2	6	Ensembl Compara 87-89|Homologene|InParanoid|OMA|OrthoInspector|OrthoMCL	SM00297|SM00487|SM00490|SM00573|SM00592|SM00951|SM01314	IPR000330 "SNF2-related, N-terminal domain"|IPR001487 "Bromodomain"|IPR001650 "Helicase, C-terminal"|IPR006576 "BRK domain"|IPR014001 "Helicase superfamily 1/2, ATP-binding domain"|IPR014012 "Helicase/SANT-associated domain"|IPR014978 "Glutamine-Leucine-Glutamine, QLQ"|IPR027417 "P-loop containing nucleoside triphosphate hydrolase"|IPR029295 "Snf2, ATP coupling domain"	Nicolaides-Baraitser syndrome, 601358
WBGene00004205	psr-1	F29B9.4	IV-2K02	ENSG00000070495	JMJD6	6	Ensembl Compara 87-89|Homologene|InParanoid|OMA|OrthoInspector|OrthoMCL	SM00558	IPR003347 "JmjC domain"
WBGene00004208	ptc-1	ZK675.1	II-5L02	ENSG00000185920	PTCH1	6	Ensembl Compara 87-89|Homologene|InParanoid|OMA|OrthoInspector|OrthoMCL		IPR003392 "Protein patched/dispatched"	Basal cell carcinoma, somatic, 605462|Basal cell nevus syndrome, 109400|Holoprosencephaly 7, 610828
WBGene00004213	ptp-1	C48D5.2	III-1F18	ENSG00000088179	PTPN4	6	Ensembl Compara 87-89|Homologene|InParanoid|OMA|OrthoInspector|OrthoMCL	SM00194|SM00228|SM00295|SM00404|SM01195|SM01196	IPR000242 "PTP type protein phosphatase"|IPR001478 "PDZ domain"|IPR003595 "Protein-tyrosine phosphatase, catalytic"|IPR011993 "PH domain-like"|IPR012151 "Protein-tyrosine phosphatase, non-receptor type-3, -4"|IPR014352 "FERM/acyl-CoA-binding protein, 3-helical bundle"|IPR014847 "FERM adjacent (FA)"|IPR018979 "FERM, N-terminal"|IPR018980 "FERM, C-terminal PH-like domain"|IPR019748 "FERM central do…
WBGene00004215	ptp-3	C09D8.1	II-7J03|II-7J05	ENSG00000153707	PTPRD	6	Ensembl Compara 87-89|Homologene|InParanoid|OMA|OrthoInspector|OrthoMCL	SM00060|SM00194|SM00404|SM00408|SM00409	IPR000242 "PTP type protein phosphatase"|IPR003595 "Protein-tyrosine phosphatase, catalytic"|IPR003598 "Immunoglobulin subtype 2"|IPR003599 "Immunoglobulin subtype"|IPR003961 "Fibronectin type III"|IPR007110 "Immunoglobulin-like domain"|IPR013098 "Immunoglobulin I-set"|IPR013783 "Immunoglobulin-like fold"|IPR029021 "Protein-tyrosine phosphatase-like"
WBGene00004248	pus-1	W06H3.2	V-11O21	ENSG00000177192	PUS1	6	Ensembl Compara 87-89|Homologene|InParanoid|OMA|OrthoInspector|OrthoMCL		IPR001406 "Pseudouridine synthase I, TruA"|IPR020094 "Pseudouridine synthase I, TruA, N-terminal"|IPR020095 "Pseudouridine synthase I, TruA, C-terminal"|IPR020097 "Pseudouridine synthase I, TruA, alpha/beta domain"|IPR020103 "Pseudouridine synthase, catalytic domain"	Myopathy, lactic acidosis, and sideroblastic anemia 1, 600462
WBGene00004254	pxf-1	T14G10.2	IV-5I14	ENSG00000158987	RAPGEF6	6	Ensembl Compara 87-89|Homologene|InParanoid|OMA|OrthoInspector|OrthoMCL	SM00100|SM00147|SM00228|SM00229|SM00314	IPR000159 "Ras-associating (RA) domain"|IPR000595 "Cyclic nucleotide-binding domain"|IPR000651 "Ras-like guanine nucleotide exchange factor, N-terminal"|IPR001478 "PDZ domain"|IPR001895 "Ras guanine-nucleotide exchange factors catalytic domain"|IPR014710 "RmlC-like jelly roll fold"|IPR018490 "Cyclic nucleotide-binding-like"|IPR023578 "Ras guanine nucleotide exchange factor domain"|IPR029071 "Ubiq…
WBGene00004255	epac-1	T20G5.5	III-5B03	ENSG00000091428	RAPGEF4	6	Ensembl Compara 87-89|Homologene|InParanoid|OMA|OrthoInspector|OrthoMCL	SM00049|SM00100|SM00147|SM00229	IPR000591 "DEP domain"|IPR000595 "Cyclic nucleotide-binding domain"|IPR000651 "Ras-like guanine nucleotide exchange factor, N-terminal"|IPR001895 "Ras guanine-nucleotide exchange factors catalytic domain"|IPR011991 "Winged helix-turn-helix DNA-binding domain"|IPR014710 "RmlC-like jelly roll fold"|IPR018490 "Cyclic nucleotide-binding-like"|IPR023578 "Ras guanine nucleotide exchange factor domain"|…
WBGene00004256	pxn-1	ZK994.3	V-6G01	ENSG00000130508	PXDN	6	Ensembl Compara 87-89|Homologene|InParanoid|OMA|OrthoInspector|OrthoMCL	SM00082|SM00214|SM00369|SM00408|SM00409	IPR000372 "Leucine-rich repeat N-terminal domain"|IPR000483 "Cysteine-rich flanking region, C-terminal"|IPR001611 "Leucine-rich repeat"|IPR003591 "Leucine-rich repeat, typical subtype"|IPR003598 "Immunoglobulin subtype 2"|IPR003599 "Immunoglobulin subtype"|IPR007110 "Immunoglobulin-like domain"|IPR010255 "Haem peroxidase"|IPR013098 "Immunoglobulin I-set"|IPR013783 "Immunoglobulin-like fold"|IPR01…	Anterior segment dysgenesis 7, with sclerocornea, 269400
WBGene00004257	pxn-2	K09C8.5	X-5E12	ENSG00000130508	PXDN	6	Ensembl Compara 87-89|Homologene|InParanoid|OMA|OrthoInspector|OrthoMCL	SM00082|SM00214|SM00369|SM00408|SM00409	IPR000372 "Leucine-rich repeat N-terminal domain"|IPR001611 "Leucine-rich repeat"|IPR003591 "Leucine-rich repeat, typical subtype"|IPR003598 "Immunoglobulin subtype 2"|IPR003599 "Immunoglobulin subtype"|IPR007110 "Immunoglobulin-like domain"|IPR010255 "Haem peroxidase"|IPR013098 "Immunoglobulin I-set"|IPR013783 "Immunoglobulin-like fold"|IPR019791 "Haem peroxidase, animal"|IPR032675 "Leucine-rich…	Anterior segment dysgenesis 7, with sclerocornea, 269400
WBGene00004266	rab-1	C39F7.4	V-1L07	ENSG00000138069	RAB1A	6	Ensembl Compara 87-89|Homologene|InParanoid|OMA|OrthoInspector|OrthoMCL	SM00173|SM00174|SM00175|SM00176|SM00177	IPR001806 "Small GTPase superfamily"|IPR005225 "Small GTP-binding protein domain"|IPR027417 "P-loop containing nucleoside triphosphate hydrolase"
WBGene00004267	rab-3	C18A3.6	II-4J08	ENSG00000152932	RAB3C	6	Ensembl Compara 87-89|Homologene|InParanoid|OMA|OrthoInspector|OrthoMCL	SM00173|SM00174|SM00175|SM00176	IPR001806 "Small GTPase superfamily"|IPR005225 "Small GTP-binding protein domain"|IPR027417 "P-loop containing nucleoside triphosphate hydrolase"
WBGene00004268	rab-5	F26H9.6	I-4J01	ENSG00000144566	RAB5A	6	Ensembl Compara 87-89|Homologene|InParanoid|OMA|OrthoInspector|OrthoMCL	SM00173|SM00174|SM00175|SM00176	IPR001806 "Small GTPase superfamily"|IPR005225 "Small GTP-binding protein domain"|IPR027417 "P-loop containing nucleoside triphosphate hydrolase"
WBGene00004272	rab-8	D1037.4	I-1F11	ENSG00000167461	RAB8A	6	Ensembl Compara 87-89|Homologene|InParanoid|OMA|OrthoInspector|OrthoMCL	SM00173|SM00174|SM00175|SM00176|SM00177	IPR001806 "Small GTPase superfamily"|IPR005225 "Small GTP-binding protein domain"|IPR027417 "P-loop containing nucleoside triphosphate hydrolase"
WBGene00004273	rab-10	T23H2.5	I-3G23	ENSG00000084733	RAB10	6	Ensembl Compara 87-89|Homologene|InParanoid|OMA|OrthoInspector|OrthoMCL	SM00173|SM00174|SM00175|SM00176|SM00177	IPR001806 "Small GTPase superfamily"|IPR005225 "Small GTP-binding protein domain"|IPR027417 "P-loop containing nucleoside triphosphate hydrolase"
WBGene00004274	rab-11.1	F53G12.1	I-1A15	ENSG00000103769	RAB11A	6	Ensembl Compara 87-89|Homologene|InParanoid|OMA|OrthoInspector|OrthoMCL	SM00173|SM00174|SM00175|SM00176	IPR001806 "Small GTPase superfamily"|IPR005225 "Small GTP-binding protein domain"|IPR027417 "P-loop containing nucleoside triphosphate hydrolase"
WBGene00004277	rab-18	Y92C3B.3	III-8I09	ENSG00000099246	RAB18	6	Ensembl Compara 87-89|Homologene|InParanoid|OMA|OrthoInspector|OrthoMCL	SM00173|SM00174|SM00175|SM00176|SM00177	IPR001806 "Small GTPase superfamily"|IPR005225 "Small GTP-binding protein domain"|IPR027417 "P-loop containing nucleoside triphosphate hydrolase"	Warburg micro syndrome 3, 614222
WBGene00004279	rab-21	T01B7.3	II-6I02	ENSG00000080371	RAB21	6	Ensembl Compara 87-89|Homologene|InParanoid|OMA|OrthoInspector|OrthoMCL	SM00173|SM00174|SM00175|SM00176	IPR001806 "Small GTPase superfamily"|IPR005225 "Small GTP-binding protein domain"|IPR027417 "P-loop containing nucleoside triphosphate hydrolase"
WBGene00004281	rab-28	Y11D7A.4	IV-4B06	ENSG00000157869	RAB28	6	Ensembl Compara 87-89|Homologene|InParanoid|OMA|OrthoInspector|OrthoMCL	SM00173|SM00174|SM00175|SM00176	IPR001806 "Small GTPase superfamily"|IPR005225 "Small GTP-binding protein domain"|IPR027417 "P-loop containing nucleoside triphosphate hydrolase"	Cone-rod dystrophy 18, 615374
WBGene00004282	rab-30	Y45F3A.2		ENSG00000137502	RAB30	6	Ensembl Compara 87-89|Homologene|InParanoid|OMA|OrthoInspector|OrthoMCL	SM00173|SM00174|SM00175|SM00176	IPR001806 "Small GTPase superfamily"|IPR005225 "Small GTP-binding protein domain"|IPR027417 "P-loop containing nucleoside triphosphate hydrolase"
WBGene00004286	rab-39	D2013.1	II-6L15	ENSG00000155961	RAB39B	6	Ensembl Compara 87-89|Homologene|InParanoid|OMA|OrthoInspector|OrthoMCL	SM00173|SM00174|SM00175|SM00176	IPR001806 "Small GTPase superfamily"|IPR005225 "Small GTP-binding protein domain"|IPR027417 "P-loop containing nucleoside triphosphate hydrolase"	Mental retardation, X-linked 72, 300271|Waisman syndrome, 311510
WBGene00004297	rad-51	Y43C5A.6	IV-5O08	ENSG00000051180	RAD51	6	Ensembl Compara 87-89|Homologene|InParanoid|OMA|OrthoInspector|OrthoMCL	SM00382	IPR003593 "AAA+ ATPase domain"|IPR010995 "DNA repair Rad51/transcription factor NusA, alpha-helical"|IPR011941 "DNA recombination/repair protein Rad51"|IPR013632 "DNA recombination and repair protein Rad51, C-terminal"|IPR016467 "DNA recombination and repair protein, RecA-like"|IPR027417 "P-loop containing nucleoside triphosphate hydrolase"	Breast cancer, susceptibility to, 114480|Fanconi anemia, complementation group R, 617244|Mirror movements 2, 614508
WBGene00004298	rad-54	W06D4.6	I-4D03	ENSG00000085999	RAD54L	6	Ensembl Compara 87-89|Homologene|InParanoid|OMA|OrthoInspector|OrthoMCL	SM00487|SM00490	IPR000330 "SNF2-related, N-terminal domain"|IPR001650 "Helicase, C-terminal"|IPR014001 "Helicase superfamily 1/2, ATP-binding domain"|IPR027417 "P-loop containing nucleoside triphosphate hydrolase"	Adenocarcinoma, colonic, somatic|Breast cancer, invasive ductal, 114480|Lymphoma, non-Hodgkin, somatic, 605027
WBGene00004302	ran-1	K01G5.4	III-5B06	ENSG00000132341	RAN	6	Ensembl Compara 87-89|Homologene|InParanoid|OMA|OrthoInspector|OrthoMCL	SM00173|SM00174|SM00175|SM00176	IPR001806 "Small GTPase superfamily"|IPR002041 "Ran GTPase"|IPR005225 "Small GTP-binding protein domain"|IPR027417 "P-loop containing nucleoside triphosphate hydrolase"
WBGene00004304	ran-3	C26D10.1	II-6G23	ENSG00000180198	RCC1	6	Ensembl Compara 87-89|Homologene|InParanoid|OMA|OrthoInspector|OrthoMCL		IPR000408 "Regulator of chromosome condensation, RCC1"|IPR009091 "Regulator of chromosome condensation 1/beta-lactamase-inhibitor protein II"
WBGene00004305	ran-4	R05D11.3	I-4A02	ENSG00000102898	NUTF2	6	Ensembl Compara 87-89|Homologene|InParanoid|OMA|OrthoInspector|OrthoMCL		IPR002075 "Nuclear transport factor 2"|IPR032710 "NTF2-like domain"
WBGene00004307	rap-1	C27B7.8	IV-4F17	ENSG00000127314	RAP1B	6	Ensembl Compara 87-89|Homologene|InParanoid|OMA|OrthoInspector|OrthoMCL	SM00173|SM00174|SM00175|SM00176	IPR001806 "Small GTPase superfamily"|IPR005225 "Small GTP-binding protein domain"|IPR020849 "Small GTPase superfamily, Ras type"|IPR027417 "P-loop containing nucleoside triphosphate hydrolase"
WBGene00004308	rap-2	C25D7.7	V-16E21	ENSG00000125249	RAP2A	6	Ensembl Compara 87-89|Homologene|InParanoid|OMA|OrthoInspector|OrthoMCL	SM00173|SM00174|SM00175|SM00176	IPR001806 "Small GTPase superfamily"|IPR005225 "Small GTP-binding protein domain"|IPR020849 "Small GTPase superfamily, Ras type"|IPR027417 "P-loop containing nucleoside triphosphate hydrolase"
WBGene00004310	ras-1	C44C11.1		ENSG00000133818	RRAS2	6	Ensembl Compara 87-89|Homologene|InParanoid|OMA|OrthoInspector|OrthoMCL	SM00173|SM00174|SM00175|SM00176	IPR001806 "Small GTPase superfamily"|IPR005225 "Small GTP-binding protein domain"|IPR020849 "Small GTPase superfamily, Ras type"|IPR027417 "P-loop containing nucleoside triphosphate hydrolase"	Ovarian carcinoma
WBGene00004311	ras-2	F17C8.4	III-8L23	ENSG00000158186	MRAS	6	Ensembl Compara 87-89|Homologene|InParanoid|OMA|OrthoInspector|OrthoMCL	SM00173|SM00174|SM00175|SM00176	IPR001806 "Small GTPase superfamily"|IPR005225 "Small GTP-binding protein domain"|IPR020849 "Small GTPase superfamily, Ras type"|IPR027417 "P-loop containing nucleoside triphosphate hydrolase"
WBGene00004313	rbc-1	F54E4.1	X-6F08	ENSG00000104093	DMXL2	6	Ensembl Compara 87-89|Homologene|InParanoid|OMA|OrthoInspector|OrthoMCL	SM00320	IPR001680 "WD40 repeat"|IPR015943 "WD40/YVTN repeat-like-containing domain"|IPR017986 "WD40-repeat-containing domain"|IPR022033 "RAVE complex protein Rav1 C-terminal"	Deafness, autosomal dominant 71, 617605|Polyendocrine-polyneuropathy syndrome, 616113
WBGene00004314	rbc-2	Y54F10AM.10	III-8I10	ENSG00000091157	WDR7	6	Ensembl Compara 87-89|Homologene|InParanoid|OMA|OrthoInspector|OrthoMCL	SM00320	IPR001680 "WD40 repeat"|IPR011047 "Quinoprotein alcohol dehydrogenase-like superfamily"|IPR015943 "WD40/YVTN repeat-like-containing domain"|IPR017986 "WD40-repeat-containing domain"
WBGene00004315	rbd-1	T23F6.4	IV-6D08	ENSG00000122965	RBM19	6	Ensembl Compara 87-89|Homologene|InParanoid|OMA|OrthoInspector|OrthoMCL	SM00360|SM00361	IPR000504 "RNA recognition motif domain"|IPR012677 "Nucleotide-binding alpha-beta plait domain"
WBGene00004317	rbg-1	F20D1.6	X-6P08	ENSG00000115839	RAB3GAP1	6	Ensembl Compara 87-89|Homologene|InParanoid|OMA|OrthoInspector|OrthoMCL		IPR026147 "Rab3 GTPase-activating protein catalytic subunit"	Warburg micro syndrome 1, 600118
WBGene00004320	rbx-1	ZK287.5	V-6D08	ENSG00000100387	RBX1	6	Ensembl Compara 87-89|Homologene|InParanoid|OMA|OrthoInspector|OrthoMCL		IPR013083 "Zinc finger, RING/FYVE/PHD-type"|IPR024766 "Zinc finger, RING-H2-type"
WBGene00004338	rfc-2	F58F6.4	IV-1O12	ENSG00000049541	RFC2	6	Ensembl Compara 87-89|Homologene|InParanoid|OMA|OrthoInspector|OrthoMCL	SM00382	IPR003593 "AAA+ ATPase domain"|IPR003959 "ATPase, AAA-type, core"|IPR008921 "DNA polymerase III, clamp loader complex, gamma/delta/delta subunit, C-terminal"|IPR013748 "Replication factor C, C-terminal"|IPR027417 "P-loop containing nucleoside triphosphate hydrolase"
WBGene00004339	rfc-3	C39E9.13	IV-7A03	ENSG00000133119	RFC3	6	Ensembl Compara 87-89|Homologene|InParanoid|OMA|OrthoInspector|OrthoMCL	SM00382	IPR008921 "DNA polymerase III, clamp loader complex, gamma/delta/delta subunit, C-terminal"|IPR027417 "P-loop containing nucleoside triphosphate hydrolase"
WBGene00004341	rfl-1	F11H8.1	III-3P05|III-8B02	ENSG00000144744	UBA3	6	Ensembl Compara 87-89|Homologene|InParanoid|OMA|OrthoInspector|OrthoMCL	SM01181	IPR000594 "THIF-type NAD/FAD binding fold"|IPR014929 "E2 binding"|IPR016040 "NAD(P)-binding domain"|IPR023318 "Ubiquitin activating enzyme, alpha domain"|IPR030468 "NEDD8-activating enzyme E1 catalytic subunit"
WBGene00004355	rha-1	T07D4.3	II-6M24	ENSG00000135829	DHX9	6	Ensembl Compara 87-89|Homologene|InParanoid|OMA|OrthoInspector|OrthoMCL	SM00358|SM00487|SM00490|SM00847	IPR001650 "Helicase, C-terminal"|IPR007502 "Helicase-associated domain"|IPR011545 "DEAD/DEAH box helicase domain"|IPR011709 "Domain of unknown function DUF1605"|IPR014001 "Helicase superfamily 1/2, ATP-binding domain"|IPR014720 "Double-stranded RNA-binding domain"|IPR027417 "P-loop containing nucleoside triphosphate hydrolase"
WBGene00004356	rhi-1	F46H6.1	X-2P01|X-8F06	ENSG00000141522	ARHGDIA	6	Ensembl Compara 87-89|Homologene|InParanoid|OMA|OrthoInspector|OrthoMCL		IPR000406 "Rho protein GDP-dissociation inhibitor"|IPR014756 "Immunoglobulin E-set"|IPR024792 "Rho GDP-dissociation inhibitor domain"	Nephrotic syndrome, type 8, 615244
WBGene00004358	rhr-1	F08F3.3		ENSG00000112077	RHAG	6	Ensembl Compara 87-89|Homologene|InParanoid|OMA|OrthoInspector|OrthoMCL		IPR001905 "Ammonium transporter"|IPR002229 "Blood group Rhesus C/E/D polypeptide"|IPR024041 "Ammonium transporter AmtB-like domain"|IPR029020 "Ammonium/urea transporter"	Anemia, hemolytic, Rh-null, regulator type, 268150|Overhydrated hereditary stomatocytosis, 185000|Rh-mod syndrome
WBGene00004373	rme-1	W06H8.1	V-14F01	ENSG00000110047	EHD1	6	Ensembl Compara 87-89|Homologene|InParanoid|OMA|OrthoInspector|OrthoMCL	SM00027	IPR000261 "EH domain"|IPR011992 "EF-hand domain pair"|IPR022812 "Dynamin superfamily"|IPR027417 "P-loop containing nucleoside triphosphate hydrolase"|IPR031692 "EH domain-containing protein, N-terminal"
WBGene00004378	rme-8	F18C12.2	I-4A15	ENSG00000138246	DNAJC13	6	Ensembl Compara 87-89|Homologene|InParanoid|OMA|OrthoInspector|OrthoMCL	SM00271	IPR001623 "DnaJ domain"|IPR011989 "Armadillo-like helical"|IPR016024 "Armadillo-type fold"|IPR025640 "Domain of unknown function DUF4339"
WBGene00004383	rnh-2	T13H5.7	II-10K07	ENSG00000104889	RNASEH2A	6	Ensembl Compara 87-89|Homologene|InParanoid|OMA|OrthoInspector|OrthoMCL		IPR001352 "Ribonuclease HII/HIII"|IPR004649 "Ribonuclease H2, subunit A"|IPR012337 "Ribonuclease H-like domain"|IPR023160 "Ribonuclease HII, helix-loop-helix cap domain"|IPR024567 "Ribonuclease HII/HIII domain"	Aicardi-Goutieres syndrome 4, 610333
WBGene00004385	rnp-2	K08D10.4	IV-2I15	ENSG00000077312	SNRPA	6	Ensembl Compara 87-89|Homologene|InParanoid|OMA|OrthoInspector|OrthoMCL	SM00360	IPR000504 "RNA recognition motif domain"|IPR012677 "Nucleotide-binding alpha-beta plait domain"|IPR024888 "U1 small nuclear ribonucleoprotein A/U2 small nuclear ribonucleoprotein B''"
WBGene00004389	rnp-6	Y47G6A.20	I-7N17|I-7N19	ENSG00000179950	PUF60	6	Ensembl Compara 87-89|Homologene|InParanoid|OMA|OrthoInspector|OrthoMCL	SM00360|SM00361	IPR000504 "RNA recognition motif domain"|IPR003954 "RNA recognition motif domain, eukaryote"|IPR006532 "Poly-U binding splicing factor, half-pint"|IPR012677 "Nucleotide-binding alpha-beta plait domain"	Verheij syndrome, 615583
WBGene00004391	rnr-1	T23G5.1	III-4P04	ENSG00000167325	RRM1	6	Ensembl Compara 87-89|Homologene|InParanoid|OMA|OrthoInspector|OrthoMCL		IPR000788 "Ribonucleotide reductase large subunit, C-terminal"|IPR005144 "ATP-cone domain"|IPR008926 "Ribonucleotide reductase R1 subunit, N-terminal"|IPR013346 "Ribonucleotide reductase, class I , alpha subunit"|IPR013509 "Ribonucleotide reductase large subunit, N-terminal"
WBGene00004392	rnr-2	C03C10.3	III-2C17	ENSG00000171848	RRM2	6	Ensembl Compara 87-89|Homologene|InParanoid|OMA|OrthoInspector|OrthoMCL		IPR000358 "Ribonucleotide reductase small subunit"|IPR009078 "Ferritin-like superfamily"|IPR012348 "Ribonucleotide reductase-related"
WBGene00004405	rop-1	C12D8.11	V-7I19	ENSG00000116747	TROVE2	6	Ensembl Compara 87-89|Homologene|InParanoid|OMA|OrthoInspector|OrthoMCL		IPR002035 "von Willebrand factor, type A"|IPR008858 "TROVE domain"
WBGene00004408	rla-0	F25H2.10	I-5G04	ENSG00000089157	RPLP0	6	Ensembl Compara 87-89|Homologene|InParanoid|OMA|OrthoInspector|OrthoMCL		IPR001790 "Ribosomal protein L10P"|IPR030670 "60S acidic ribosomal protein P0"
WBGene00004411	rpc-1	C42D4.8	IV-3F19	ENSG00000148606	POLR3A	6	Ensembl Compara 87-89|Homologene|InParanoid|OMA|OrthoInspector|OrthoMCL	SM00663	IPR000722 "RNA polymerase, alpha subunit"|IPR006592 "RNA polymerase, N-terminal"|IPR007066 "RNA polymerase Rpb1, domain 3"|IPR007080 "RNA polymerase Rpb1, domain 1"|IPR007081 "RNA polymerase Rpb1, domain 5"|IPR007083 "RNA polymerase Rpb1, domain 4"	Leukodystrophy, hypomyelinating, 7, with or without oligodontia and/or hypogonadotropic hypogonadism, 60
WBGene00004412	rpl-1	Y71F9AL.13	I-8E21	ENSG00000198755	RPL10A	6	Ensembl Compara 87-89|Homologene|InParanoid|OMA|OrthoInspector|OrthoMCL		IPR002143 "Ribosomal protein L1"|IPR016094 "Ribosomal protein L1, 2-layer alpha/beta-sandwich"|IPR016095 "Ribosomal protein L1, 3-layer alpha/beta-sandwich"|IPR023674 "Ribosomal protein L1-like"|IPR028364 "Ribosomal protein L1/ribosomal biogenesis protein"
WBGene00004413	rpl-2	B0250.1	V-13C07	ENSG00000161016	RPL8	6	Ensembl Compara 87-89|Homologene|InParanoid|OMA|OrthoInspector|OrthoMCL	SM01382|SM01383	IPR002171 "Ribosomal protein L2"|IPR008991 "Translation protein SH3-like domain"|IPR012340 "Nucleic acid-binding, OB-fold"|IPR014722 "Ribosomal protein L2 domain 2"|IPR014726 "Ribosomal protein L2, domain 3"|IPR022666 "Ribosomal Proteins L2, RNA binding domain"|IPR022669 "Ribosomal protein L2, C-terminal"
WBGene00004414	rpl-3	F13B10.2	III-1N22	ENSG00000100316	RPL3	6	Ensembl Compara 87-89|Homologene|InParanoid|OMA|OrthoInspector|OrthoMCL		IPR000597 "Ribosomal protein L3"|IPR009000 "Translation protein, beta-barrel domain"
WBGene00004415	rpl-4	B0041.4	I-2E11|I-9G14	ENSG00000174444	RPL4	6	Ensembl Compara 87-89|Homologene|InParanoid|OMA|OrthoInspector|OrthoMCL		IPR002136 "Ribosomal protein L4/L1e"|IPR023574 "Ribosomal protein L4 domain"|IPR025755 "60S ribosomal protein L4, C-terminal domain"
WBGene00004416	rpl-5	F54C9.5	II-6A14	ENSG00000122406	RPL5	6	Ensembl Compara 87-89|Homologene|InParanoid|OMA|OrthoInspector|OrthoMCL		IPR005485 "Ribosomal protein L5 eukaryotic/L18 archaeal"|IPR025607 "Ribosomal protein L5 eukaryotic/L18 archaeal, C-terminal"
WBGene00004418	rpl-7	F53G12.10	I-1C09	ENSG00000147604	RPL7	6	Ensembl Compara 87-89|Homologene|InParanoid|OMA|OrthoInspector|OrthoMCL		IPR005998 "Ribosomal protein L7, eukaryotic"|IPR012988 "Ribosomal protein L30, N-terminal"|IPR016082 "Ribosomal protein L30, ferredoxin-like fold domain"
WBGene00004421	rpl-10	F10B5.1	II-6A13	ENSG00000165496	RPL10L	6	Ensembl Compara 87-89|Homologene|InParanoid|OMA|OrthoInspector|OrthoMCL		IPR001197 "Ribosomal protein L10e"|IPR016180 "Ribosomal protein L10e/L16"
WBGene00004422	rpl-11.1	T22F3.4	V-3O13	ENSG00000142676	RPL11	6	Ensembl Compara 87-89|Homologene|InParanoid|OMA|OrthoInspector|OrthoMCL		IPR002132 "Ribosomal protein L5"|IPR022803 "Ribosomal protein L5 domain"|IPR031309 "Ribosomal protein L5, C-terminal"|IPR031310 "Ribosomal protein L5, N-terminal"	Diamond-Blackfan anemia 7, 612562
WBGene00004423	rpl-11.2	F07D10.1	X-1D22	ENSG00000142676	RPL11	6	Ensembl Compara 87-89|Homologene|InParanoid|OMA|OrthoInspector|OrthoMCL		IPR002132 "Ribosomal protein L5"|IPR022803 "Ribosomal protein L5 domain"|IPR031309 "Ribosomal protein L5, C-terminal"|IPR031310 "Ribosomal protein L5, N-terminal"	Diamond-Blackfan anemia 7, 612562
WBGene00004424	rpl-12	JC8.3	IV-7E03	ENSG00000197958	RPL12	6	Ensembl Compara 87-89|Homologene|InParanoid|OMA|OrthoInspector|OrthoMCL	SM00649	IPR000911 "Ribosomal protein L11/L12"|IPR020783 "Ribosomal protein L11, C-terminal"|IPR020784 "Ribosomal protein L11, N-terminal"
WBGene00004425	rpl-13	C32E8.2	I-1H19	ENSG00000167526	RPL13	6	Ensembl Compara 87-89|Homologene|InParanoid|OMA|OrthoInspector|OrthoMCL		IPR001380 "Ribosomal protein L13e"
WBGene00004426	rpl-14	C04F12.4	I-4H12	ENSG00000188846	RPL14	6	Ensembl Compara 87-89|Homologene|InParanoid|OMA|OrthoInspector|OrthoMCL		IPR002784 "Ribosomal protein L14e domain"|IPR008991 "Translation protein SH3-like domain"|IPR014722 "Ribosomal protein L2 domain 2"
WBGene00004430	rpl-18	Y45F10D.12	IV-7G08	ENSG00000063177	RPL18	6	Ensembl Compara 87-89|Homologene|InParanoid|OMA|OrthoInspector|OrthoMCL		IPR000039 "Ribosomal protein L18e"|IPR021131 "Ribosomal protein L18e/L15P"
WBGene00004431	rpl-19	C09D4.5	I-2B19	ENSG00000108298	RPL19	6	Ensembl Compara 87-89|Homologene|InParanoid|OMA|OrthoInspector|OrthoMCL	SM01416	IPR000196 "Ribosomal protein L19/L19e domain"|IPR015972 "Ribosomal protein L19/L19e, domain 1"|IPR015974 "Ribosomal protein L19/L19e, domain 3"
WBGene00004433	rpl-21	C14B9.7	III-4E14	ENSG00000122026	RPL21	6	Ensembl Compara 87-89|Homologene|InParanoid|OMA|OrthoInspector|OrthoMCL		IPR001147 "Ribosomal protein L21e"|IPR008991 "Translation protein SH3-like domain"	Hypotrichosis 12, 615885
WBGene00004434	rpl-22	C27A2.2	II-4O03	ENSG00000116251	RPL22	6	Ensembl Compara 87-89|Homologene|InParanoid|OMA|OrthoInspector|OrthoMCL		IPR002671 "Ribosomal protein L22e"
WBGene00004435	rpl-23	B0336.10	III-3C05	ENSG00000125691	RPL23	6	Ensembl Compara 87-89|Homologene|InParanoid|OMA|OrthoInspector|OrthoMCL	SM01374	IPR000218 "Ribosomal protein L14P"
WBGene00004436	rpl-24.1	D1007.12	I-2C07	ENSG00000114391	RPL24	6	Ensembl Compara 87-89|Homologene|InParanoid|OMA|OrthoInspector|OrthoMCL	SM00746	IPR000988 "Ribosomal protein L24e-related"|IPR023441 "Ribosomal protein L24e domain"
WBGene00004437	rpl-24.2	C03D6.8	I-4F18|I-4H04	ENSG00000137876	RSL24D1	6	Ensembl Compara 87-89|Homologene|InParanoid|OMA|OrthoInspector|OrthoMCL	SM00746	IPR000988 "Ribosomal protein L24e-related"|IPR011017 "TRASH domain"|IPR023441 "Ribosomal protein L24e domain"|IPR024546 "Ribosome biogenesis protein RLP24"
WBGene00004440	rpl-26	F28C6.7	II-6C16	ENSG00000161970	RPL26	6	Ensembl Compara 87-89|Homologene|InParanoid|OMA|OrthoInspector|OrthoMCL	SM00739	IPR005756 "Ribosomal protein L26/L24P, eukaryotic/archaeal"|IPR005824 "KOW"|IPR008991 "Translation protein SH3-like domain"|IPR014722 "Ribosomal protein L2 domain 2"	Diamond-Blackfan anemia 11, 614900
WBGene00004441	rpl-27	C53H9.1	I-9N06	ENSG00000131469	RPL27	6	Ensembl Compara 87-89|Homologene|InParanoid|OMA|OrthoInspector|OrthoMCL	SM00739	IPR001141 "Ribosomal protein L27e"|IPR005824 "KOW"|IPR008991 "Translation protein SH3-like domain"|IPR014722 "Ribosomal protein L2 domain 2"	Diamond-Blackfan anemia 16, 617408
WBGene00004444	rpl-30	Y106G6H.3	I-5O23	ENSG00000156482	RPL30	6	Ensembl Compara 87-89|Homologene|InParanoid|OMA|OrthoInspector|OrthoMCL		IPR000231 "Ribosomal protein L30e"|IPR004038 "Ribosomal protein L7Ae/L30e/S12e/Gadd45"|IPR029064 "50S ribosomal protein L30e-like"
WBGene00004445	rpl-31	W09C5.6	I-9N07	ENSG00000071082	RPL31	6	Ensembl Compara 87-89|Homologene|InParanoid|OMA|OrthoInspector|OrthoMCL	SM01380	IPR000054 "Ribosomal protein L31e"|IPR023621 "Ribosomal protein L31e domain"
WBGene00004446	rpl-32	T24B8.1		ENSG00000144713	RPL32	6	Ensembl Compara 87-89|Homologene|InParanoid|OMA|OrthoInspector|OrthoMCL	SM01393	IPR001515 "Ribosomal protein L32e"
WBGene00004447	rpl-33	F10E7.7	II-5M18	ENSG00000182899	RPL35A	6	Ensembl Compara 87-89|Homologene|InParanoid|OMA|OrthoInspector|OrthoMCL		IPR001780 "Ribosomal protein L35A"|IPR009000 "Translation protein, beta-barrel domain"	Diamond-Blackfan anemia 5, 612528
WBGene00004449	rpl-35	ZK652.4	III-4I21	ENSG00000136942	RPL35	6	Ensembl Compara 87-89|Homologene|InParanoid|OMA|OrthoInspector|OrthoMCL		IPR001854 "Ribosomal protein L29"
WBGene00004452	rpl-38	C06B8.8	V-10O21	ENSG00000172809	RPL38	6	Ensembl Compara 87-89|Homologene|InParanoid|OMA|OrthoInspector|OrthoMCL		IPR002675 "Ribosomal protein L38e"
WBGene00004454	rpl-36.A	C09H10.2	II-7L03	ENSG00000241343	RPL36A	6	Ensembl Compara 87-89|Homologene|InParanoid|OMA|OrthoInspector|OrthoMCL		IPR000552 "Ribosomal protein L44e"|IPR011332 "Zinc-binding ribosomal protein"
WBGene00004456	rpl-43	Y48B6A.2	II-9E13	ENSG00000197756	RPL37A	6	Ensembl Compara 87-89|Homologene|InParanoid|OMA|OrthoInspector|OrthoMCL		IPR002674 "Ribosomal protein L37ae"|IPR011331 "Ribosomal protein L37ae/L37e"|IPR011332 "Zinc-binding ribosomal protein"
WBGene00004457	rpm-1	C01B7.6	V-14A20	ENSG00000005810	MYCBP2	6	Ensembl Compara 87-89|Homologene|InParanoid|OMA|OrthoInspector|OrthoMCL	SM00184|SM01337	IPR000315 "B-box-type zinc finger"|IPR000408 "Regulator of chromosome condensation, RCC1"|IPR001841 "Zinc finger, RING-type"|IPR004939 "APC10/DOC domain"|IPR008979 "Galactose-binding domain-like"|IPR009091 "Regulator of chromosome condensation 1/beta-lactamase-inhibitor protein II"|IPR012983 "PHR"|IPR013083 "Zinc finger, RING/FYVE/PHD-type"|IPR013783 "Immunoglobulin-like fold"
WBGene00004458	rpn-1	T22D1.9	IV-3K24	ENSG00000175166	PSMD2	6	Ensembl Compara 87-89|Homologene|InParanoid|OMA|OrthoInspector|OrthoMCL		IPR002015 "Proteasome/cyclosome repeat"|IPR016024 "Armadillo-type fold"|IPR016643 "26S proteasome regulatory complex, non-ATPase subcomplex, Rpn1 subunit"
WBGene00004460	rpn-3	C30C11.2	III-4D09	ENSG00000108344	PSMD3	6	Ensembl Compara 87-89|Homologene|InParanoid|OMA|OrthoInspector|OrthoMCL	SM00088|SM00753	IPR000717 "Proteasome component (PCI) domain"|IPR011991 "Winged helix-turn-helix DNA-binding domain"|IPR013586 "26S proteasome regulatory subunit, C-terminal"
WBGene00004461	rpn-5	F10G7.8	II-10B15|II-3P14	ENSG00000197170	PSMD12	6	Ensembl Compara 87-89|Homologene|InParanoid|OMA|OrthoInspector|OrthoMCL	SM00088|SM00753	IPR000717 "Proteasome component (PCI) domain"|IPR011991 "Winged helix-turn-helix DNA-binding domain"	Stankiewicz-Isidor syndrome, 617516
WBGene00004462	rpn-6.1	F57B9.10	III-3N05	ENSG00000108671	PSMD11	6	Ensembl Compara 87-89|Homologene|InParanoid|OMA|OrthoInspector|OrthoMCL	SM00088|SM00753	IPR000717 "Proteasome component (PCI) domain"|IPR011990 "Tetratricopeptide-like helical domain"|IPR011991 "Winged helix-turn-helix DNA-binding domain"
WBGene00004463	rpn-7	F49C12.8	IV-4D24	ENSG00000163636	PSMD6	6	Ensembl Compara 87-89|Homologene|InParanoid|OMA|OrthoInspector|OrthoMCL	SM00088|SM00753	IPR000717 "Proteasome component (PCI) domain"|IPR011991 "Winged helix-turn-helix DNA-binding domain"|IPR019585 "26S proteasome regulatory subunit Rpn7/COP9 signalosome complex subunit 1"
WBGene00004464	rpn-8	R12E2.3	I-1F10	ENSG00000103035	PSMD7	6	Ensembl Compara 87-89|Homologene|InParanoid|OMA|OrthoInspector|OrthoMCL	SM00232	IPR000555 "JAB1/MPN/MOV34 metalloenzyme domain"|IPR024969 "Rpn11/EIF3F, C-terminal"
WBGene00004465	rpn-9	T06D8.8	II-7P15	ENSG00000185627	PSMD13	6	Ensembl Compara 87-89|Homologene|InParanoid|OMA|OrthoInspector|OrthoMCL	SM00088|SM00753	IPR000717 "Proteasome component (PCI) domain"|IPR011991 "Winged helix-turn-helix DNA-binding domain"
WBGene00004466	rpn-10	B0205.3	I-5M08	ENSG00000159352	PSMD4	6	Ensembl Compara 87-89|Homologene|InParanoid|OMA|OrthoInspector|OrthoMCL	SM00327|SM00726	IPR002035 "von Willebrand factor, type A"|IPR003903 "Ubiquitin interacting motif"|IPR027040 "Proteasome subunit Rpn10"
WBGene00004467	rpn-11	K07D4.3	II-3L07	ENSG00000115233	PSMD14	6	Ensembl Compara 87-89|Homologene|InParanoid|OMA|OrthoInspector|OrthoMCL	SM00232	IPR000555 "JAB1/MPN/MOV34 metalloenzyme domain"|IPR024969 "Rpn11/EIF3F, C-terminal"
WBGene00004469	rps-0	B0393.1	III-2M04	ENSG00000168028	RPSA	6	Ensembl Compara 87-89|Homologene|InParanoid|OMA|OrthoInspector|OrthoMCL		IPR001865 "Ribosomal protein S2"|IPR005707 "Ribosomal protein S2, eukaryotic/archaeal"|IPR023591 "Ribosomal protein S2, flavodoxin-like domain"	Asplenia, isolated congenital, 271400
WBGene00004470	rps-1	F56F3.5	III-2C02	ENSG00000145425	RPS3A	6	Ensembl Compara 87-89|Homologene|InParanoid|OMA|OrthoInspector|OrthoMCL	SM01397	IPR001593 "Ribosomal protein S3Ae"
WBGene00004471	rps-2	C49H3.11	IV-4C21	ENSG00000140988	RPS2	6	Ensembl Compara 87-89|Homologene|InParanoid|OMA|OrthoInspector|OrthoMCL		IPR000851 "Ribosomal protein S5"|IPR005324 "Ribosomal protein S5, C-terminal"|IPR005711 "Ribosomal protein S5, eukaryotic/archaeal"|IPR013810 "Ribosomal protein S5, N-terminal"|IPR014720 "Double-stranded RNA-binding domain"|IPR014721 "Ribosomal protein S5 domain 2-type fold, subgroup"|IPR020568 "Ribosomal protein S5 domain 2-type fold"
WBGene00004472	rps-3	C23G10.3	III-3C02	ENSG00000149273	RPS3	6	Ensembl Compara 87-89|Homologene|InParanoid|OMA|OrthoInspector|OrthoMCL		IPR001351 "Ribosomal protein S3, C-terminal"|IPR004044 "K Homology domain, type 2"|IPR005703 "Ribosomal protein S3, eukaryotic/archaeal"|IPR009019 "K homology domain, prokaryotic type"|IPR015946 "K homology domain-like, alpha/beta"
WBGene00004473	rps-4	Y43B11AR.4	IV-9H05	ENSG00000198034	RPS4X	6	Ensembl Compara 87-89|Homologene|InParanoid|OMA|OrthoInspector|OrthoMCL	SM00363	IPR000876 "Ribosomal protein S4e"|IPR013843 "Ribosomal protein S4e, N-terminal"|IPR013845 "Ribosomal protein S4e, central region"|IPR032277 "40S ribosomal protein S4, C-terminal domain"
WBGene00004474	rps-5	T05E11.1	IV-5L14	ENSG00000083845	RPS5	6	Ensembl Compara 87-89|Homologene|InParanoid|OMA|OrthoInspector|OrthoMCL		IPR000235 "Ribosomal protein S5/S7"|IPR005716 "Ribosomal protein S5/S7, eukaryotic/archaeal"|IPR023798 "Ribosomal protein S7 domain"
WBGene00004475	rps-6	Y71A12B.1	I-9G15	ENSG00000137154	RPS6	6	Ensembl Compara 87-89|Homologene|InParanoid|OMA|OrthoInspector|OrthoMCL	SM01405	IPR001377 "Ribosomal protein S6e"|IPR014401 "Ribosomal protein S6, eukaryotic"
WBGene00004476	rps-7	ZC434.2	I-5M09	ENSG00000171863	RPS7	6	Ensembl Compara 87-89|Homologene|InParanoid|OMA|OrthoInspector|OrthoMCL		IPR000554 "Ribosomal protein S7e"	Diamond-Blackfan anemia 8, 612563
WBGene00004477	rps-8	F42C5.8	IV-3L07|IV-3L21	ENSG00000142937	RPS8	6	Ensembl Compara 87-89|Homologene|InParanoid|OMA|OrthoInspector|OrthoMCL		IPR001047 "Ribosomal protein S8e"|IPR022309 "Ribosomal protein S8e/ribosomal biogenesis NSA2"
WBGene00004480	rps-11	F40F11.1	IV-6M09	ENSG00000142534	RPS11	6	Ensembl Compara 87-89|Homologene|InParanoid|OMA|OrthoInspector|OrthoMCL		IPR000266 "Ribosomal protein S17/S11"|IPR012340 "Nucleic acid-binding, OB-fold"|IPR028333 "Ribosomal protein S17, archaeal/eukaryotic"|IPR032440 "40S ribosomal protein S11, N-terminal"
WBGene00004481	rps-12	F54E7.2	III-2P24	ENSG00000112306	RPS12	6	Ensembl Compara 87-89|Homologene|InParanoid|OMA|OrthoInspector|OrthoMCL		IPR000530 "Ribosomal protein S12e"|IPR004038 "Ribosomal protein L7Ae/L30e/S12e/Gadd45"|IPR029064 "50S ribosomal protein L30e-like"
WBGene00004482	rps-13	C16A3.9	III-3K14	ENSG00000110700	RPS13	6	Ensembl Compara 87-89|Homologene|InParanoid|OMA|OrthoInspector|OrthoMCL	SM01386|SM01387	IPR000589 "Ribosomal protein S15"|IPR009068 "S15/NS1, RNA-binding"|IPR011991 "Winged helix-turn-helix DNA-binding domain"|IPR012606 "Ribosomal protein S13/S15, N-terminal"
WBGene00004483	rps-14	F37C12.9	III-3F20	ENSG00000164587	RPS14	6	Ensembl Compara 87-89|Homologene|InParanoid|OMA|OrthoInspector|OrthoMCL		IPR001971 "Ribosomal protein S11"	Macrocytic anemia, refractory, due to 5q deletion, somatic, 153550
WBGene00004485	rps-16	T01C3.6	V-9D22	ENSG00000105193	RPS16	6	Ensembl Compara 87-89|Homologene|InParanoid|OMA|OrthoInspector|OrthoMCL		IPR000754 "Ribosomal protein S9"|IPR014721 "Ribosomal protein S5 domain 2-type fold, subgroup"|IPR020568 "Ribosomal protein S5 domain 2-type fold"
WBGene00004486	rps-17	T08B2.10	I-2P12	ENSG00000182774	RPS17	6	Ensembl Compara 87-89|Homologene|InParanoid|OMA|OrthoInspector|OrthoMCL		IPR001210 "Ribosomal protein S17e"	Diamond-Blackfan anemia 4, 612527
WBGene00004489	rps-20	Y105E8A.16	I-7O07	ENSG00000008988	RPS20	6	Ensembl Compara 87-89|Homologene|InParanoid|OMA|OrthoInspector|OrthoMCL	SM01403	IPR001848 "Ribosomal protein S10"|IPR005729 "Ribosomal protein S10, eukaryotic/archaeal"|IPR027486 "Ribosomal protein S10 domain"
WBGene00004490	rps-21	F37C12.11	III-3F24	ENSG00000171858	RPS21	6	Ensembl Compara 87-89|Homologene|InParanoid|OMA|OrthoInspector|OrthoMCL		IPR001931 "Ribosomal protein S21e"
WBGene00004491	rps-22	F53A3.3	III-1O10	ENSG00000134419	RPS15A	6	Ensembl Compara 87-89|Homologene|InParanoid|OMA|OrthoInspector|OrthoMCL		IPR000630 "Ribosomal protein S8"
WBGene00004492	rps-23	F28D1.7	IV-6H19	ENSG00000186468	RPS23	6	Ensembl Compara 87-89|Homologene|InParanoid|OMA|OrthoInspector|OrthoMCL		IPR005680 "Ribosomal protein S23, eukaryotic/archaeal"|IPR006032 "Ribosomal protein S12/S23"|IPR012340 "Nucleic acid-binding, OB-fold"	Brachycephaly, trichomegaly, and developmental delay, 617412
WBGene00004495	rps-26	F39B2.6	I-7G18	ENSG00000197728	RPS26	6	Ensembl Compara 87-89|Homologene|InParanoid|OMA|OrthoInspector|OrthoMCL		IPR000892 "Ribosomal protein S26e"	Diamond-Blackfan anemia 10, 613309
WBGene00004496	rps-27	F56E10.4	V-1C03	ENSG00000177954	RPS27	6	Ensembl Compara 87-89|Homologene|InParanoid|OMA|OrthoInspector|OrthoMCL		IPR000592 "Ribosomal protein S27e"|IPR011332 "Zinc-binding ribosomal protein"|IPR023407 "Ribosomal protein S27e, zinc-binding domain"
WBGene00004501	rpt-1	C52E4.4	V-8E11	ENSG00000161057	PSMC2	6	Ensembl Compara 87-89|Homologene|InParanoid|OMA|OrthoInspector|OrthoMCL	SM00382	IPR003593 "AAA+ ATPase domain"|IPR003959 "ATPase, AAA-type, core"|IPR005937 "26S proteasome subunit P45"|IPR027417 "P-loop containing nucleoside triphosphate hydrolase"
WBGene00004502	rpt-2	F29G9.5		ENSG00000100764	PSMC1	6	Ensembl Compara 87-89|Homologene|InParanoid|OMA|OrthoInspector|OrthoMCL	SM00382	IPR003593 "AAA+ ATPase domain"|IPR003959 "ATPase, AAA-type, core"|IPR005937 "26S proteasome subunit P45"|IPR027417 "P-loop containing nucleoside triphosphate hydrolase"
WBGene00004504	rpt-4	F23F1.8	II-1C09	ENSG00000100519	PSMC6	6	Ensembl Compara 87-89|Homologene|InParanoid|OMA|OrthoInspector|OrthoMCL	SM00382	IPR003593 "AAA+ ATPase domain"|IPR003959 "ATPase, AAA-type, core"|IPR005937 "26S proteasome subunit P45"|IPR027417 "P-loop containing nucleoside triphosphate hydrolase"
WBGene00004505	rpt-5	F56H1.4	I-2L13	ENSG00000165916	PSMC3	6	Ensembl Compara 87-89|Homologene|InParanoid|OMA|OrthoInspector|OrthoMCL	SM00382	IPR003593 "AAA+ ATPase domain"|IPR003959 "ATPase, AAA-type, core"|IPR005937 "26S proteasome subunit P45"|IPR027417 "P-loop containing nucleoside triphosphate hydrolase"
WBGene00004507	rpy-1	C18H9.7	II-5M07	ENSG00000165917	RAPSN	6	Ensembl Compara 87-89|Homologene|InParanoid|OMA|OrthoInspector|OrthoMCL	SM00028|SM00184	IPR001237 "43kDa postsynaptic protein"|IPR001841 "Zinc finger, RING-type"|IPR001965 "Zinc finger, PHD-type"|IPR011990 "Tetratricopeptide-like helical domain"|IPR013083 "Zinc finger, RING/FYVE/PHD-type"|IPR019568 "Rapsyn, myristoylation/linker region, N-terminal"|IPR019734 "Tetratricopeptide repeat"	Fetal akinesia deformation sequence, 208150|Myasthenic syndrome, congenital, 11, associated with acetylcholine receptor deficiency, 616326
WBGene00004679	rars-1	F26F4.10	III-2F13|III-8B04	ENSG00000113643	RARS	6	Ensembl Compara 87-89|Homologene|InParanoid|OMA|OrthoInspector|OrthoMCL	SM00836|SM01016	IPR001278 "Arginine-tRNA ligase"|IPR005148 "Arginyl tRNA synthetase N-terminal domain"|IPR008909 "DALR anticodon binding"|IPR009080 "Aminoacyl-tRNA synthetase, class Ia, anticodon-binding"|IPR014729 "Rossmann-like alpha/beta/alpha sandwich fold"	Leukodystrophy, hypomyelinating, 9, 616140
WBGene00004719	sad-1	F15A2.6	X-6I02|X-6I04	ENSG00000174672	BRSK2	6	Ensembl Compara 87-89|Homologene|InParanoid|OMA|OrthoInspector|OrthoMCL	SM00220	IPR000719 "Protein kinase domain"|IPR011009 "Protein kinase-like domain"
WBGene00004728	sax-2	F21H11.2	III-2N09|III-2N11	ENSG00000075539	FRYL	6	Ensembl Compara 87-89|Homologene|InParanoid|OMA|OrthoInspector|OrthoMCL		IPR016024 "Armadillo-type fold"|IPR025481 "Cell morphogenesis protein C-terminal"|IPR025614 "Cell morphogenesis protein N-terminal"
WBGene00004736	sca-1	K11D9.2	III-5D02	ENSG00000196296	ATP2A1	6	Ensembl Compara 87-89|Homologene|InParanoid|OMA|OrthoInspector|OrthoMCL	SM00831	IPR001757 "P-type ATPase"|IPR004014 "Cation-transporting P-type ATPase, N-terminal"|IPR005782 "P-type ATPase, subfamily IIA, SERCA-type"|IPR006068 "Cation-transporting P-type ATPase, C-terminal"|IPR008250 "P-type ATPase, A domain"|IPR023214 "HAD-like domain"|IPR023298 "P-type ATPase, transmembrane domain"|IPR023299 "P-type ATPase, cytoplasmic domain N"	Brody myopathy, 601003
WBGene00004738	scc-3	F18E2.3	V-8D05	ENSG00000101972	STAG2	6	Ensembl Compara 87-89|Homologene|InParanoid|OMA|OrthoInspector|OrthoMCL		IPR013721 "STAG"|IPR016024 "Armadillo-type fold"
WBGene00004752	sec-5	T23G7.4	II-10B17	ENSG00000112685	EXOC2	6	Ensembl Compara 87-89|Homologene|InParanoid|OMA|OrthoInspector|OrthoMCL		IPR002909 "IPT domain"|IPR013783 "Immunoglobulin-like fold"|IPR014756 "Immunoglobulin E-set"|IPR029175 "Exocyst complex component EXOC2/Sec5"
WBGene00004753	sec-8	Y106G6H.7	I-5A08	ENSG00000131558	EXOC4	6	Ensembl Compara 87-89|Homologene|InParanoid|OMA|OrthoInspector|OrthoMCL		IPR007191 "Sec8 exocyst complex component specific domain"
WBGene00004755	sec-24.1	F12F6.6	IV-6M01	ENSG00000176986	SEC24C	6	Ensembl Compara 87-89|Homologene|InParanoid|OMA|OrthoInspector|OrthoMCL		IPR002035 "von Willebrand factor, type A"|IPR006895 "Zinc finger, Sec23/Sec24-type"|IPR006896 "Sec23/Sec24, trunk domain"|IPR006900 "Sec23/Sec24, helical domain"|IPR007123 "Gelsolin-like domain"|IPR012990 "Sec23/Sec24 beta-sandwich"|IPR029006 "ADF-H/Gelsolin-like domain"
WBGene00004756	sec-24.2	ZC518.2	IV-6H01	ENSG00000138802	SEC24B	6	Ensembl Compara 87-89|Homologene|InParanoid|OMA|OrthoInspector|OrthoMCL		IPR002035 "von Willebrand factor, type A"|IPR006895 "Zinc finger, Sec23/Sec24-type"|IPR006896 "Sec23/Sec24, trunk domain"|IPR006900 "Sec23/Sec24, helical domain"|IPR007123 "Gelsolin-like domain"|IPR012990 "Sec23/Sec24 beta-sandwich"|IPR029006 "ADF-H/Gelsolin-like domain"
WBGene00004758	sek-1	R03G5.2	X-4E03	ENSG00000108984	MAP2K6	6	Ensembl Compara 87-89|Homologene|InParanoid|OMA|OrthoInspector|OrthoMCL	SM00220	IPR000719 "Protein kinase domain"|IPR011009 "Protein kinase-like domain"
WBGene00004759	sel-1	F45D3.5		ENSG00000071537	SEL1L	6	Ensembl Compara 87-89|Homologene|InParanoid|OMA|OrthoInspector|OrthoMCL	SM00059|SM00671	IPR006597 "Sel1-like repeat"|IPR011990 "Tetratricopeptide-like helical domain"
WBGene00004760	sel-2	F10F2.1	III-8B24	ENSG00000172915	NBEA	6	Ensembl Compara 87-89|Homologene|InParanoid|OMA|OrthoInspector|OrthoMCL	SM00320|SM01026	IPR000409 "BEACH domain"|IPR001680 "WD40 repeat"|IPR010508 "Domain of unknown function DUF1088"|IPR011989 "Armadillo-like helical"|IPR011993 "PH domain-like"|IPR013320 "Concanavalin A-like lectin/glucanase domain"|IPR015943 "WD40/YVTN repeat-like-containing domain"|IPR016024 "Armadillo-type fold"|IPR017986 "WD40-repeat-containing domain"|IPR023362 "PH-BEACH domain"|IPR031570 "Domain of unknown fu…
WBGene00004766	sel-9	W02D7.7	V-14P07	ENSG00000086598	TMED2	6	Ensembl Compara 87-89|Homologene|InParanoid|OMA|OrthoInspector|OrthoMCL	SM01190	IPR009038 "GOLD domain"|IPR015720 "TMP21-related"
WBGene00004768	sel-11	F55A11.3	V-14I03	ENSG00000162298	SYVN1	6	Ensembl Compara 87-89|Homologene|InParanoid|OMA|OrthoInspector|OrthoMCL	SM00184	IPR001841 "Zinc finger, RING-type"|IPR013083 "Zinc finger, RING/FYVE/PHD-type"|IPR032832 "E3 ubiquitin-protein ligase synoviolin/Hrd1"
WBGene00004774	sem-5	C14F5.5	X-4G19	ENSG00000177885	GRB2	6	Ensembl Compara 87-89|Homologene|InParanoid|OMA|OrthoInspector|OrthoMCL	SM00252|SM00326	IPR000980 "SH2 domain"|IPR001452 "SH3 domain"
WBGene00004789	sgk-1	W10G6.2		ENSG00000118515	SGK1	6	Ensembl Compara 87-89|Homologene|InParanoid|OMA|OrthoInspector|OrthoMCL	SM00133|SM00220	IPR000719 "Protein kinase domain"|IPR000961 "AGC-kinase, C-terminal"|IPR001683 "Phox homologous domain"|IPR011009 "Protein kinase-like domain"
WBGene00006477	chup-1	ZK721.1	X-4B03|X-4O14	ENSG00000149577	SIDT2	6	Ensembl Compara 87-89|Homologene|InParanoid|OMA|OrthoInspector|OrthoMCL		IPR025958 "SID1 transmembrane family"
WBGene00004801	sir-2.2	F46G10.7	X-6C18	ENSG00000089163	SIRT4	6	Ensembl Compara 87-89|Homologene|InParanoid|OMA|OrthoInspector|OrthoMCL		IPR003000 "Sirtuin family"|IPR026591 "Sirtuin family, catalytic core small domain"|IPR029035 "DHS-like NAD/FAD-binding domain"
WBGene00004806	skp-1	T27F2.1	V-7L14	ENSG00000100603	SNW1	6	Ensembl Compara 87-89|Homologene|InParanoid|OMA|OrthoInspector|OrthoMCL		IPR004015 "SKI-interacting protein SKIP, SNW domain"|IPR017862 "SKI-interacting protein, SKIP"
WBGene00004807	skr-1	F46A9.5	I-4N11	ENSG00000113558	SKP1	6	Ensembl Compara 87-89|Homologene|InParanoid|OMA|OrthoInspector|OrthoMCL	SM00512	IPR001232 "S-phase kinase-associated protein 1-like"|IPR011333 "SKP1/BTB/POZ domain"|IPR016072 "SKP1 component, dimerisation"|IPR016073 "SKP1 component, POZ domain"|IPR016897 "S-phase kinase-associated protein 1"
WBGene00004830	slo-1	Y51A2D.19	V-14N18	ENSG00000156113	KCNMA1	6	Ensembl Compara 87-89|Homologene|InParanoid|OMA|OrthoInspector|OrthoMCL		IPR003929 "Potassium channel, calcium-activated, BK, alpha subunit"|IPR005821 "Ion transport domain"|IPR016040 "NAD(P)-binding domain"|IPR024939 "Calcium-activated potassium channel Slo"|IPR028325 "Voltage-gated potassium channel"	Cerebellar atrophy, developmental delay, and seizures, 617643|Paroxysmal nonkinesigenic dyskinesia, 3, with or without generalized epilepsy, 609446
WBGene00004831	slo-2	F08B12.3	X-5B07|X-8L20	ENSG00000107147	KCNT1	6	Ensembl Compara 87-89|Homologene|InParanoid|OMA|OrthoInspector|OrthoMCL		IPR003929 "Potassium channel, calcium-activated, BK, alpha subunit"|IPR013099 "Potassium channel domain"|IPR016040 "NAD(P)-binding domain"	Epilepsy, nocturnal frontal lobe, 5, 615005|Epileptic encephalopathy, early infantile, 14, 614959
WBGene00004854	slt-1	F40E10.4	X-6F20	ENSG00000145147	SLIT2	6	Ensembl Compara 87-89|Homologene|InParanoid|OMA|OrthoInspector|OrthoMCL	SM00013|SM00041|SM00082|SM00179|SM00181|SM00274|SM00282|SM00365|SM00369	IPR000372 "Leucine-rich repeat N-terminal domain"|IPR000483 "Cysteine-rich flanking region, C-terminal"|IPR000742 "EGF-like domain"|IPR001611 "Leucine-rich repeat"|IPR001791 "Laminin G domain"|IPR001881 "EGF-like calcium-binding domain"|IPR003591 "Leucine-rich repeat, typical subtype"|IPR006207 "Cystine knot, C-terminal"|IPR013320 "Concanavalin A-like lectin/glucanase domain"|IPR032675 "Leucine-r…
WBGene00004860	sma-6	C32D5.2	II-10B18|II-4N13	ENSG00000138696	BMPR1B	6	Ensembl Compara 87-89|Homologene|InParanoid|OMA|OrthoInspector|OrthoMCL	SM00220|SM00467	IPR000333 "Ser/Thr protein kinase, TGFB receptor"|IPR000472 "Activin types I and II receptor domain"|IPR000719 "Protein kinase domain"|IPR003605 "GS domain"|IPR011009 "Protein kinase-like domain"	Acromesomelic dysplasia, Demirhan type, 609441|Brachydactyly, type A1, D, 616849|Brachydactyly, type A2, 112600
WBGene00004873	smc-3	Y47D3A.26	III-5L08	ENSG00000108055	SMC3	6	Ensembl Compara 87-89|Homologene|InParanoid|OMA|OrthoInspector|OrthoMCL	SM00968	IPR003395 "RecF/RecN/SMC, N-terminal"|IPR010935 "SMCs flexible hinge"|IPR024704 "Structural maintenance of chromosomes protein"|IPR027417 "P-loop containing nucleoside triphosphate hydrolase"|IPR029685 "Structural maintenance of chromosomes protein 3"	Cornelia de Lange syndrome 3, 610759
WBGene00004880	smg-2	Y48G8AL.6	I-9B02	ENSG00000005007	UPF1	6	Ensembl Compara 87-89|Homologene|InParanoid|OMA|OrthoInspector|OrthoMCL		IPR018999 "RNA helicase UPF1, UPF2-interacting domain"|IPR027417 "P-loop containing nucleoside triphosphate hydrolase"
WBGene00004895	smu-1	CC4.3	I-6J07	ENSG00000122692	SMU1	6	Ensembl Compara 87-89|Homologene|InParanoid|OMA|OrthoInspector|OrthoMCL	SM00320|SM00667|SM00668	IPR001680 "WD40 repeat"|IPR006594 "LIS1 homology motif"|IPR006595 "CTLH, C-terminal LisH motif"|IPR015943 "WD40/YVTN repeat-like-containing domain"|IPR017986 "WD40-repeat-containing domain"|IPR020472 "G-protein beta WD-40 repeat"
WBGene00004912	sng-1	T08A9.3	X-3F24	ENSG00000100321	SYNGR1	6	Ensembl Compara 87-89|Homologene|InParanoid|OMA|OrthoInspector|OrthoMCL		IPR008253 "Marvel domain"|IPR016579 "Synaptogyrin"
WBGene00004913	snn-1	Y38C1BA.2	IV-1H03|IV-1H05|IV-1H07|IV-1H11|IV-8F05|IV-8F09	ENSG00000185666	SYN3	6	Ensembl Compara 87-89|Homologene|InParanoid|OMA|OrthoInspector|OrthoMCL		IPR001359 "Synapsin"|IPR013815 "ATP-grasp fold, subdomain 1"|IPR013816 "ATP-grasp fold, subdomain 2"|IPR016185 "Pre-ATP-grasp domain"|IPR020897 "Synapsin, pre-ATP-grasp domain"|IPR020898 "Synapsin, ATP-binding domain"
WBGene00004914	snr-1	Y116A8C.42	IV-8K09	ENSG00000100028	SNRPD3	6	Ensembl Compara 87-89|Homologene|InParanoid|OMA|OrthoInspector|OrthoMCL	SM00651	IPR001163 "LSM domain, eukaryotic/archaea-type"|IPR010920 "LSM domain"|IPR027141 "Like-Sm (LSM) domain containing protein, LSm4/SmD1/SmD3"
WBGene00004916	snr-3	T28D9.10	II-5C19	ENSG00000167088	SNRPD1	6	Ensembl Compara 87-89|Homologene|InParanoid|OMA|OrthoInspector|OrthoMCL	SM00651	IPR001163 "LSM domain, eukaryotic/archaea-type"|IPR010920 "LSM domain"|IPR027141 "Like-Sm (LSM) domain containing protein, LSm4/SmD1/SmD3"
WBGene00004917	snr-4	C52E4.3	V-8E09	ENSG00000125743	SNRPD2	6	Ensembl Compara 87-89|Homologene|InParanoid|OMA|OrthoInspector|OrthoMCL	SM00651	IPR001163 "LSM domain, eukaryotic/archaea-type"|IPR010920 "LSM domain"|IPR027248 "Small nuclear ribonucleoprotein Sm D2"
WBGene00004920	snr-7	Y71F9B.4	I-8I01	ENSG00000143977	SNRPG	6	Ensembl Compara 87-89|Homologene|InParanoid|OMA|OrthoInspector|OrthoMCL	SM00651	IPR001163 "LSM domain, eukaryotic/archaea-type"|IPR010920 "LSM domain"|IPR017132 "Sm-like protein Lsm7/snRNP-G"
WBGene00004921	snt-1	F31E8.2	II-5A10	ENSG00000067715	SYT1	6	Ensembl Compara 87-89|Homologene|InParanoid|OMA|OrthoInspector|OrthoMCL	SM00239	IPR000008 "C2 domain"|IPR001565 "Synaptotagmin"
WBGene00004927	snx-1	C05D9.1	X-1C18	ENSG00000205302	SNX2	6	Ensembl Compara 87-89|Homologene|InParanoid|OMA|OrthoInspector|OrthoMCL	SM00312	IPR001683 "Phox homologous domain"|IPR015404 "Sorting nexin Vps5-like, C-terminal"
WBGene00004929	soc-2	AC7.2	IV-2L23	ENSG00000108061	SHOC2	6	Ensembl Compara 87-89|Homologene|InParanoid|OMA|OrthoInspector|OrthoMCL	SM00364|SM00365|SM00369	IPR001611 "Leucine-rich repeat"|IPR003591 "Leucine-rich repeat, typical subtype"|IPR032675 "Leucine-rich repeat domain, L domain-like"	Noonan-like syndrome with loose anagen hair, 607721
WBGene00004931	sod-2	F10D11.1	I-4K13	ENSG00000112096	SOD2	6	Ensembl Compara 87-89|Homologene|InParanoid|OMA|OrthoInspector|OrthoMCL		IPR001189 "Manganese/iron superoxide dismutase"|IPR019831 "Manganese/iron superoxide dismutase, N-terminal"|IPR019832 "Manganese/iron superoxide dismutase, C-terminal"	Microvascular complications of diabetes 6, 612634
WBGene00004947	sos-1	T28F12.3	V-13M22	ENSG00000115904	SOS1	6	Ensembl Compara 87-89|Homologene|InParanoid|OMA|OrthoInspector|OrthoMCL	SM00147|SM00229|SM00233|SM00325	IPR000219 "Dbl homology (DH) domain"|IPR000651 "Ras-like guanine nucleotide exchange factor, N-terminal"|IPR001849 "Pleckstrin homology domain"|IPR001895 "Ras guanine-nucleotide exchange factors catalytic domain"|IPR009072 "Histone-fold"|IPR011993 "PH domain-like"|IPR023578 "Ras guanine nucleotide exchange factor domain"	Fibromatosis, gingival, 1, 135300|Noonan syndrome 4, 610733
WBGene00004951	spc-1	K10B3.10	X-2I13	ENSG00000197694	SPTAN1	6	Ensembl Compara 87-89|Homologene|InParanoid|OMA|OrthoInspector|OrthoMCL	SM00054|SM00150|SM00326|SM01184	IPR001452 "SH3 domain"|IPR002017 "Spectrin repeat"|IPR002048 "EF-hand domain"|IPR011992 "EF-hand domain pair"|IPR013315 "Spectrin alpha chain, SH3 domain"|IPR014837 "EF-hand, Ca insensitive"|IPR018159 "Spectrin/alpha-actinin"	Epileptic encephalopathy, early infantile, 5, 613477
WBGene00004978	spg-7	Y47G6A.10	I-7B02|I-7P23	ENSG00000141385	AFG3L2	6	Ensembl Compara 87-89|Homologene|InParanoid|OMA|OrthoInspector|OrthoMCL	SM00382	IPR000642 "Peptidase M41"|IPR003593 "AAA+ ATPase domain"|IPR003959 "ATPase, AAA-type, core"|IPR005936 "Peptidase, FtsH"|IPR011546 "Peptidase M41, FtsH extracellular"|IPR027417 "P-loop containing nucleoside triphosphate hydrolase"	Spastic ataxia 5, autosomal recessive, 614487|Spinocerebellar ataxia 28, 610246
WBGene00004980	spk-1	B0464.5	III-8B07	ENSG00000184343	SRPK3	6	Ensembl Compara 87-89|Homologene|InParanoid|OMA|OrthoInspector|OrthoMCL	SM00220	IPR000719 "Protein kinase domain"|IPR011009 "Protein kinase-like domain"
WBGene00005007	spr-2	C27B7.1	IV-9H06	ENSG00000119335	SET	6	Ensembl Compara 87-89|Homologene|InParanoid|OMA|OrthoInspector|OrthoMCL		IPR002164 "Nucleosome assembly protein (NAP)"
WBGene00005014	spt-4	F54C4.2	III-1C01	ENSG00000213246	SUPT4H1	6	Ensembl Compara 87-89|Homologene|InParanoid|OMA|OrthoInspector|OrthoMCL	SM01389	IPR009287 "Transcription initiation Spt4"|IPR016046 "Transcription initiation Spt4-like"|IPR022800 "Spt4/RpoE2 zinc finger"|IPR029040 "RNA polymerase subunit RPABC4/transcription elongation factor Spt4"
WBGene00005015	spt-5	K08E4.1	IV-6K24|IV-9A20	ENSG00000196235	SUPT5H	6	Ensembl Compara 87-89|Homologene|InParanoid|OMA|OrthoInspector|OrthoMCL	SM00738|SM00739|SM01104	IPR005100 "Transcription elongation factor Spt5, NGN domain"|IPR005824 "KOW"|IPR006645 "NusG, N-terminal"|IPR008991 "Translation protein SH3-like domain"|IPR017071 "Transcription elongation factor Spt5"|IPR022581 "Spt5 transcription elongation factor, N-terminal"|IPR024945 "Spt5 C-terminal domain"
WBGene00005019	sqv-1	D2096.4	IV-4C06	ENSG00000115652	UXS1	6	Ensembl Compara 87-89|Homologene|InParanoid|OMA|OrthoInspector|OrthoMCL		IPR016040 "NAD(P)-binding domain"
WBGene00005020	sqv-2	Y110A2AL.14	II-9F11	ENSG00000176022	B3GALT6	6	Ensembl Compara 87-89|Homologene|InParanoid|OMA|OrthoInspector|OrthoMCL		IPR002659 "Glycosyl transferase, family 31"	Ehlers-Danlos syndrome, spondylodysplastic type, 2, 615349|Spondyloepimetaphyseal dysplasia with joint laxity, type 1, with or without fractures, 271640
WBGene00005021	sqv-3	R10E11.4	III-5A12	ENSG00000027847	B4GALT7	6	Ensembl Compara 87-89|Homologene|InParanoid|OMA|OrthoInspector|OrthoMCL		IPR003859 "Beta-1,4-galactosyltransferase"|IPR027791 "Galactosyltransferase, C-terminal"|IPR027995 "Galactosyltransferase, N-terminal"|IPR029044 "Nucleotide-diphospho-sugar transferases"	Ehlers-Danlos syndrome, spondylodysplastic type, 1, 130070
WBGene00005022	sqv-4	F29F11.1	V-7I10	ENSG00000109814	UGDH	6	Ensembl Compara 87-89|Homologene|InParanoid|OMA|OrthoInspector|OrthoMCL	SM00984	IPR001732 "UDP-glucose/GDP-mannose dehydrogenase, N-terminal"|IPR008927 "6-phosphogluconate dehydrogenase C-terminal domain-like"|IPR014026 "UDP-glucose/GDP-mannose dehydrogenase, dimerisation"|IPR014027 "UDP-glucose/GDP-mannose dehydrogenase, C-terminal"|IPR016040 "NAD(P)-binding domain"|IPR017476 "UDP-glucose/GDP-mannose dehydrogenase"|IPR028356 "UDP-glucose 6-dehydrogenase, eukaryotic type"
WBGene00005023	sqv-5	T24D1.1	I-5A05	ENSG00000198108	CHSY3	6	Ensembl Compara 87-89|Homologene|InParanoid|OMA|OrthoInspector|OrthoMCL		IPR008428 "Chondroitin N-acetylgalactosaminyltransferase"|IPR029044 "Nucleotide-diphospho-sugar transferases"
WBGene00005025	sqv-7	C52E12.3	II-5G22	ENSG00000116704	SLC35D1	6	Ensembl Compara 87-89|Homologene|InParanoid|OMA|OrthoInspector|OrthoMCL		IPR004853 "Sugar phosphate transporter domain"	Schneckenbecken dysplasia, 269250
WBGene00005026	sqv-8	ZK1307.5	II-6L10	ENSG00000149541	B3GAT3	6	Ensembl Compara 87-89|Homologene|InParanoid|OMA|OrthoInspector|OrthoMCL		IPR005027 "Glycosyl transferase, family 43"|IPR029044 "Nucleotide-diphospho-sugar transferases"	Multiple joint dislocations, short stature, craniofacial dysmorphism, with or without congenital heart d
WBGene00005077	src-1	Y92H12A.1		ENSG00000010810	FYN	6	Ensembl Compara 87-89|Homologene|InParanoid|OMA|OrthoInspector|OrthoMCL	SM00219|SM00252|SM00326	IPR000980 "SH2 domain"|IPR001245 "Serine-threonine/tyrosine-protein kinase catalytic domain"|IPR001452 "SH3 domain"|IPR011009 "Protein kinase-like domain"|IPR020635 "Tyrosine-protein kinase, catalytic domain"
WBGene00006059	stc-1	F54C9.2	II-6A08	ENSG00000155304	HSPA13	6	Ensembl Compara 87-89|Homologene|InParanoid|OMA|OrthoInspector|OrthoMCL		IPR013126 "Heat shock protein 70 family"
WBGene00006061	stl-1	F30A10.5	I-4N23	ENSG00000165283	STOML2	6	Ensembl Compara 87-89|Homologene|InParanoid|OMA|OrthoInspector|OrthoMCL	SM00244	IPR001107 "Band 7 domain"|IPR001972 "Stomatin family"|IPR032435 "Band 7, C-terminal extension"
WBGene00006062	stn-1	F30A10.8	I-4P05	ENSG00000172164	SNTB1	6	Ensembl Compara 87-89|Homologene|InParanoid|OMA|OrthoInspector|OrthoMCL	SM00228|SM00233	IPR001478 "PDZ domain"|IPR001849 "Pleckstrin homology domain"|IPR011993 "PH domain-like"|IPR015482 "Syntrophin"|IPR031072 "Syntrophin-1"
WBGene00006307	suf-1	F28C6.6	II-10B24	ENSG00000176102	CSTF3	6	Ensembl Compara 87-89|Homologene|InParanoid|OMA|OrthoInspector|OrthoMCL	SM00386	IPR003107 "HAT (Half-A-TPR) repeat"|IPR008847 "Suppressor of forked"|IPR011990 "Tetratricopeptide-like helical domain"
WBGene00006308	sul-1	K09C4.8	X-2M19	ENSG00000137573	SULF1	6	Ensembl Compara 87-89|Homologene|InParanoid|OMA|OrthoInspector|OrthoMCL		IPR000917 "Sulfatase, N-terminal"|IPR017849 "Alkaline phosphatase-like, alpha/beta/alpha"|IPR017850 "Alkaline-phosphatase-like, core domain"
WBGene00006349	sur-2	F39B2.4	I-7G14	ENSG00000112282	MED23	6	Ensembl Compara 87-89|Homologene|InParanoid|OMA|OrthoInspector|OrthoMCL		IPR021629 "Mediator complex, subunit Med23"	Mental retardation, autosomal recessive 18, 614249
WBGene00006351	sur-5	K03A1.5	X-3F16	ENSG00000081760	AACS	6	Ensembl Compara 87-89|Homologene|InParanoid|OMA|OrthoInspector|OrthoMCL		IPR000873 "AMP-dependent synthetase/ligase"|IPR005914 "Acetoacetyl-CoA synthase"|IPR025110 "AMP-binding enzyme C-terminal domain"|IPR032387 "Acetyl-coenzyme A synthetase, N-terminal domain"
WBGene00006352	sur-6	F26E4.1	I-4J16	ENSG00000175470	PPP2R2D	6	Ensembl Compara 87-89|Homologene|InParanoid|OMA|OrthoInspector|OrthoMCL	SM00320	IPR000009 "Protein phosphatase 2A regulatory subunit PR55"|IPR001680 "WD40 repeat"|IPR015943 "WD40/YVTN repeat-like-containing domain"|IPR017986 "WD40-repeat-containing domain"
WBGene00006364	syd-2	F59F5.6	X-5K09	ENSG00000139220	PPFIA2	6	Ensembl Compara 87-89|Homologene|InParanoid|OMA|OrthoInspector|OrthoMCL	SM00454	IPR001660 "Sterile alpha motif domain"|IPR013761 "Sterile alpha motif/pointed domain"|IPR029515 "LAR-interacting protein, Liprin"|IPR030442 "Liprin-alpha"
WBGene00006382	taf-1	W04A8.7	I-7C07|I-7C09|I-7C11|I-7C13	ENSG00000147133	TAF1	6	Ensembl Compara 87-89|Homologene|InParanoid|OMA|OrthoInspector|OrthoMCL	SM00297	IPR001487 "Bromodomain"|IPR011177 "Transcription initiation factor TFIID subunit 1, animal"|IPR022591 "Transcription initiation factor TFIID subunit 1, domain of unknown function"	Dystonia-Parkinsonism, X-linked, 314250|Mental retardation, X-linked, syndromic 33, 300966
WBGene00006383	taf-2	Y37E11B.4	IV-9A24	ENSG00000064313	TAF2	6	Ensembl Compara 87-89|Homologene|InParanoid|OMA|OrthoInspector|OrthoMCL		IPR014782 "Peptidase M1, membrane alanine aminopeptidase, N-terminal"	Mental retardation, autosomal recessive 40, 615599
WBGene00006386	taf-5	F30F8.8	I-3J16	ENSG00000148835	TAF5	6	Ensembl Compara 87-89|Homologene|InParanoid|OMA|OrthoInspector|OrthoMCL	SM00320	IPR001680 "WD40 repeat"|IPR006594 "LIS1 homology motif"|IPR007582 "TFIID subunit TAF5, NTD2 domain"|IPR015943 "WD40/YVTN repeat-like-containing domain"|IPR017986 "WD40-repeat-containing domain"|IPR020472 "G-protein beta WD-40 repeat"
WBGene00006397	taf-13	C14A4.10	II-11E19	ENSG00000197780	TAF13	6	Ensembl Compara 87-89|Homologene|InParanoid|OMA|OrthoInspector|OrthoMCL		IPR003195 "Transcription initiation factor IID, 18kDa subunit"|IPR009072 "Histone-fold"	Mental retardation, autosomal recessive 60, 617432
WBGene00006405	itsn-1	Y116A8C.36	IV-8I23	ENSG00000205726	ITSN1	6	Ensembl Compara 87-89|Homologene|InParanoid|OMA|OrthoInspector|OrthoMCL	SM00027|SM00054|SM00233|SM00239|SM00325|SM00326	IPR000261 "EH domain"|IPR001452 "SH3 domain"|IPR011511 "Variant SH3 domain"|IPR011992 "EF-hand domain pair"
WBGene00006410	nck-1	ZK470.5	X-2F03	ENSG00000071051	NCK2	6	Ensembl Compara 87-89|Homologene|InParanoid|OMA|OrthoInspector|OrthoMCL	SM00252|SM00326	IPR000980 "SH2 domain"|IPR001452 "SH3 domain"|IPR011511 "Variant SH3 domain"|IPR017304 "Cytoplasmic protein NCK"
WBGene00006412	nlg-1	C40C9.5	X-6M16	ENSG00000165246	NLGN4Y	6	Ensembl Compara 87-89|Homologene|InParanoid|OMA|OrthoInspector|OrthoMCL		IPR002018 "Carboxylesterase, type B"|IPR029058 "Alpha/Beta hydrolase fold"
WBGene00006414	raga-1	T24F1.1	II-7B10	ENSG00000083750	RRAGB	6	Ensembl Compara 87-89|Homologene|InParanoid|OMA|OrthoInspector|OrthoMCL		IPR006762 "Gtr1/RagA G protein"|IPR027417 "P-loop containing nucleoside triphosphate hydrolase"
WBGene00006415	tag-30	F38H4.7	IV-6E22|IV-6G02	ENSG00000133243	BTBD2	6	Ensembl Compara 87-89|Homologene|InParanoid|OMA|OrthoInspector|OrthoMCL	SM00225|SM00875	IPR000210 "BTB/POZ domain"|IPR011333 "SKP1/BTB/POZ domain"|IPR011705 "BTB/Kelch-associated"|IPR012983 "PHR"
WBGene00006416	sams-5	T13A10.11	IV-3O05	ENSG00000168906	MAT2A	6	Ensembl Compara 87-89|Homologene|InParanoid|OMA|OrthoInspector|OrthoMCL		IPR002133 "S-adenosylmethionine synthetase"|IPR022628 "S-adenosylmethionine synthetase, N-terminal"|IPR022629 "S-adenosylmethionine synthetase, central domain"|IPR022630 "S-adenosylmethionine synthetase, C-terminal"|IPR022636 "S-adenosylmethionine synthetase superfamily"
WBGene00008205	sams-1	C49F5.1	X-5P21	ENSG00000168906	MAT2A	6	Ensembl Compara 87-89|Homologene|InParanoid|OMA|OrthoInspector|OrthoMCL		IPR002133 "S-adenosylmethionine synthetase"|IPR022628 "S-adenosylmethionine synthetase, N-terminal"|IPR022629 "S-adenosylmethionine synthetase, central domain"|IPR022630 "S-adenosylmethionine synthetase, C-terminal"|IPR022636 "S-adenosylmethionine synthetase superfamily"
WBGene00015538	sams-3	C06E7.1	IV-3A21	ENSG00000168906	MAT2A	6	Ensembl Compara 87-89|Homologene|InParanoid|OMA|OrthoInspector|OrthoMCL		IPR002133 "S-adenosylmethionine synthetase"|IPR022628 "S-adenosylmethionine synthetase, N-terminal"|IPR022629 "S-adenosylmethionine synthetase, central domain"|IPR022630 "S-adenosylmethionine synthetase, C-terminal"|IPR022636 "S-adenosylmethionine synthetase superfamily"
WBGene00015540	sams-4	C06E7.3	IV-3C01	ENSG00000168906	MAT2A	6	Ensembl Compara 87-89|Homologene|InParanoid|OMA|OrthoInspector|OrthoMCL		IPR002133 "S-adenosylmethionine synthetase"|IPR022628 "S-adenosylmethionine synthetase, N-terminal"|IPR022629 "S-adenosylmethionine synthetase, central domain"|IPR022630 "S-adenosylmethionine synthetase, C-terminal"|IPR022636 "S-adenosylmethionine synthetase superfamily"
WBGene00006432	tag-53	F33C8.1	X-6H10	ENSG00000088812	ATRN	6	Ensembl Compara 87-89|Homologene|InParanoid|OMA|OrthoInspector|OrthoMCL	SM00034|SM00042|SM00180|SM00181|SM00423	IPR000742 "EGF-like domain"|IPR000859 "CUB domain"|IPR002049 "Laminin EGF domain"|IPR002165 "Plexin repeat"|IPR006652 "Kelch repeat type 1"|IPR015915 "Kelch-type beta propeller"|IPR015916 "Galactose oxidase, beta-propeller"|IPR016201 "Plexin-like fold"
WBGene00006433	sdhb-1	F42A8.2	II-6N13	ENSG00000117118	SDHB	6	Ensembl Compara 87-89|Homologene|InParanoid|OMA|OrthoInspector|OrthoMCL		IPR001041 "2Fe-2S ferredoxin-type iron-sulfur binding domain"|IPR004489 "Succinate dehydrogenase/fumarate reductase iron-sulphur protein"|IPR009051 "Alpha-helical ferredoxin"|IPR012675 "Beta-grasp domain"|IPR025192 "Succinate dehydogenase/fumarate reductase N-terminal"	Cowden syndrome 2, 612359|Gastrointestinal stromal tumor, 606764|Paraganglioma and gastric stromal sarcoma, 606864|Paragangliomas 4, 115310|Pheochromocytoma, 171300
WBGene00006437	mrck-1	K08B12.5	V-4L05	ENSG00000143776	CDC42BPA	6	Ensembl Compara 87-89|Homologene|InParanoid|OMA|OrthoInspector|OrthoMCL	SM00036|SM00109|SM00133|SM00220|SM00233|SM00285	IPR000095 "CRIB domain"|IPR000719 "Protein kinase domain"|IPR000961 "AGC-kinase, C-terminal"|IPR001180 "Citron homology (CNH) domain"|IPR001849 "Pleckstrin homology domain"|IPR002219 "Protein kinase C-like, phorbol ester/diacylglycerol-binding domain"|IPR011009 "Protein kinase-like domain"|IPR011993 "PH domain-like"|IPR017892 "Protein kinase, C-terminal"
WBGene00006443	pak-2	C45B11.1	V-7F15	ENSG00000101349	PAK5	6	Ensembl Compara 87-89|Homologene|InParanoid|OMA|OrthoInspector|OrthoMCL	SM00285	IPR000095 "CRIB domain"|IPR000719 "Protein kinase domain"|IPR011009 "Protein kinase-like domain"
WBGene00006446	atx-3	F28F8.6	V-15E03	ENSG00000066427	ATXN3	6	Ensembl Compara 87-89|Homologene|InParanoid|OMA|OrthoInspector|OrthoMCL	SM00726|SM01246	IPR003903 "Ubiquitin interacting motif"|IPR006155 "Machado-Joseph disease protein MJD"	Machado-Joseph disease, 109150
WBGene00006447	tag-72	C25A1.3	I-5G17	ENSG00000101654	RNMT	6	Ensembl Compara 87-89|Homologene|InParanoid|OMA|OrthoInspector|OrthoMCL		IPR004971 "mRNA (guanine-N(7))-methyltransferase domain"|IPR016899 "mRNA (guanine-N(7))-methyltransferase"|IPR029063 "S-adenosyl-L-methionine-dependent methyltransferase"
WBGene00006448	glod-4	C16C10.10	III-2G01	ENSG00000167699	GLOD4	6	Ensembl Compara 87-89|Homologene|InParanoid|OMA|OrthoInspector|OrthoMCL		IPR004360 "Glyoxalase/fosfomycin resistance/dioxygenase domain"|IPR029068 "Glyoxalase/Bleomycin resistance protein/Dihydroxybiphenyl dioxygenase"
WBGene00006460	ppm-1	F25D1.1	V-7E02	ENSG00000138032	PPM1B	6	Ensembl Compara 87-89|Homologene|InParanoid|OMA|OrthoInspector|OrthoMCL	SM00332	IPR001932 "PPM-type phosphatase domain"|IPR012911 "Protein serine/threonine phosphatase 2C, C-terminal"|IPR015655 "Protein phosphatase 2C family"
WBGene00006473	tag-124	E02H1.3	II-6J04	ENSG00000110060	PUS3	6	Ensembl Compara 87-89|Homologene|InParanoid|OMA|OrthoInspector|OrthoMCL		IPR001406 "Pseudouridine synthase I, TruA"|IPR020094 "Pseudouridine synthase I, TruA, N-terminal"|IPR020095 "Pseudouridine synthase I, TruA, C-terminal"|IPR020097 "Pseudouridine synthase I, TruA, alpha/beta domain"|IPR020103 "Pseudouridine synthase, catalytic domain"	Mental retardation, autosomal recessive 55, 617051
WBGene00006474	wdr-5.1	C14B1.4	III-1H22	ENSG00000196363	WDR5	6	Ensembl Compara 87-89|Homologene|InParanoid|OMA|OrthoInspector|OrthoMCL	SM00320	IPR001680 "WD40 repeat"|IPR015943 "WD40/YVTN repeat-like-containing domain"|IPR017986 "WD40-repeat-containing domain"|IPR020472 "G-protein beta WD-40 repeat"
WBGene00006478	tag-131	H38K22.3	III-2K15	ENSG00000167740	CYB5D2	6	Ensembl Compara 87-89|Homologene|InParanoid|OMA|OrthoInspector|OrthoMCL	SM01117	IPR001199 "Cytochrome b5-like heme/steroid binding domain"
WBGene00006481	plrg-1	D1054.15	V-7O06	ENSG00000171566	PLRG1	6	Ensembl Compara 87-89|Homologene|InParanoid|OMA|OrthoInspector|OrthoMCL	SM00320	IPR001680 "WD40 repeat"|IPR015943 "WD40/YVTN repeat-like-containing domain"|IPR017986 "WD40-repeat-containing domain"|IPR020472 "G-protein beta WD-40 repeat"
WBGene00022717	hipr-1	ZK370.3	III-4N05	ENSG00000127946	HIP1	6	Ensembl Compara 87-89|Homologene|InParanoid|OMA|OrthoInspector|OrthoMCL	SM00273|SM00307	IPR002558 "I/LWEQ domain"|IPR008942 "ENTH/VHS"|IPR011417 "AP180 N-terminal homology (ANTH) domain"|IPR013809 "ENTH domain"|IPR030224 "Sla2 family"	Prostate cancer, progression of, 176807
WBGene00021936		Y55F3BL.2	IV-10C10|IV-8P13	ENSG00000104635	SLC39A14	6	Ensembl Compara 87-89|Homologene|InParanoid|OMA|OrthoInspector|OrthoMCL		IPR003689 "Zinc/iron permease"	Hypermanganesemia with dystonia 2, 617013
WBGene00006491	acl-3	ZK809.2	IV-6O19	ENSG00000102125	TAZ	6	Ensembl Compara 87-89|Homologene|InParanoid|OMA|OrthoInspector|OrthoMCL	SM00563	IPR000872 "Tafazzin"|IPR002123 "Phospholipid/glycerol acyltransferase"	Barth syndrome, 302060
WBGene00006493	tag-147	R09A8.3	X-6A17	ENSG00000116679	IVNS1ABP	6	Ensembl Compara 87-89|Homologene|InParanoid|OMA|OrthoInspector|OrthoMCL	SM00225|SM00612|SM00875	IPR000210 "BTB/POZ domain"|IPR006652 "Kelch repeat type 1"|IPR011043 "Galactose oxidase/kelch, beta-propeller"|IPR011333 "SKP1/BTB/POZ domain"|IPR011705 "BTB/Kelch-associated"|IPR015916 "Galactose oxidase, beta-propeller"
WBGene00006497	tag-151	F10G7.1	II-3N24	ENSG00000167721	TSR1	6	Ensembl Compara 87-89|Homologene|InParanoid|OMA|OrthoInspector|OrthoMCL	SM00785|SM01362	IPR007034 "Ribosome biogenesis protein BMS1/TSR1, C-terminal"|IPR012948 "AARP2CN"
WBGene00006498	ten-1	R13F6.4	III-3H09|III-3H23	ENSG00000145934	TENM2	6	Ensembl Compara 87-89|Homologene|InParanoid|OMA|OrthoInspector|OrthoMCL	SM00179|SM00181	IPR000742 "EGF-like domain"|IPR011042 "Six-bladed beta-propeller, TolB-like"|IPR011044 "Quinoprotein amine dehydrogenase, beta chain-like"|IPR028916 "Tox-GHH domain"
WBGene00006503	snx-3	W06D4.5	I-4D01	ENSG00000147164	SNX12	6	Ensembl Compara 87-89|Homologene|InParanoid|OMA|OrthoInspector|OrthoMCL	SM00312	IPR001683 "Phox homologous domain"
WBGene00006510	mtrr-1	C01G6.6	II-6L07	ENSG00000124275	MTRR	6	Ensembl Compara 87-89|Homologene|InParanoid|OMA|OrthoInspector|OrthoMCL		IPR001094 "Flavodoxin-like"|IPR001433 "Oxidoreductase FAD/NAD(P)-binding"|IPR001709 "Flavoprotein pyridine nucleotide cytochrome reductase"|IPR003097 "FAD-binding, type 1"|IPR008254 "Flavodoxin/nitric oxide synthase"|IPR017938 "Riboflavin synthase-like beta-barrel"|IPR023173 "NADPH-cytochrome p450 reductase, FAD-binding, alpha-helical domain-3"|IPR029039 "Flavoprotein-like domain"	Homocystinuria-megaloblastic anemia, cbl E type, 236270|Neural tube defects, folate-sensitive, susceptibility to, 601634
WBGene00006515	txdc-9	C05D11.3	III-3K22	ENSG00000115514	TXNDC9	6	Ensembl Compara 87-89|Homologene|InParanoid|OMA|OrthoInspector|OrthoMCL		IPR012336 "Thioredoxin-like fold"|IPR013766 "Thioredoxin domain"
WBGene00006518	tag-173	F27D4.5	I-3H04	ENSG00000083123	BCKDHB	6	Ensembl Compara 87-89|Homologene|InParanoid|OMA|OrthoInspector|OrthoMCL	SM00861	IPR005475 "Transketolase-like, pyrimidine-binding domain"|IPR009014 "Transketolase C-terminal/Pyruvate-ferredoxin oxidoreductase domain II"|IPR029061 "Thiamin diphosphate-binding fold"|IPR033247 "Transketolase family"|IPR033248 "Transketolase, C-terminal domain"	Maple syrup urine disease, type Ib, 248600
WBGene00006520	tag-175	D2013.10	II-6N09	ENSG00000166471	TMEM41B	6	Ensembl Compara 87-89|Homologene|InParanoid|OMA|OrthoInspector|OrthoMCL		IPR015414 "Transmembrane protein TMEM64/TMEM41"|IPR032816 "SNARE associated Golgi protein"
WBGene00006526	tax-4	ZC84.2	III-8B10	ENSG00000144191	CNGA3	6	Ensembl Compara 87-89|Homologene|InParanoid|OMA|OrthoInspector|OrthoMCL	SM00100	IPR000595 "Cyclic nucleotide-binding domain"|IPR003938 "Potassium channel, voltage-dependent, EAG/ELK/ERG"|IPR005821 "Ion transport domain"|IPR014710 "RmlC-like jelly roll fold"|IPR018490 "Cyclic nucleotide-binding-like"|IPR032406 "Cyclic nucleotide-gated channel, C-terminal leucine zipper domain"	Achromatopsia 2, 216900
WBGene00006527	tax-6	C02F4.2	IV-5F13	ENSG00000138814	PPP3CA	6	Ensembl Compara 87-89|Homologene|InParanoid|OMA|OrthoInspector|OrthoMCL	SM00156	IPR004843 "Calcineurin-like phosphoesterase domain, apaH type"|IPR006186 "Serine/threonine-specific protein phosphatase/bis(5-nucleosyl)-tetraphosphatase"|IPR029052 "Metallo-dependent phosphatase-like"	Epileptic encephalopathy, infantile or early childhood, 617711
WBGene00006541	tbh-1	H13N06.6	X-7K05	ENSG00000123454	DBH	6	Ensembl Compara 87-89|Homologene|InParanoid|OMA|OrthoInspector|OrthoMCL	SM00664	IPR000323 "Copper type II, ascorbate-dependent monooxygenase, N-terminal"|IPR000945 "Dopamine beta-hydroxylase-related"|IPR005018 "DOMON domain"|IPR008977 "PHM/PNGase F domain"|IPR014784 "Copper type II, ascorbate-dependent monooxygenase-like, C-terminal"|IPR024548 "Copper type II ascorbate-dependent monooxygenase, C-terminal"|IPR028460 "Tyramine beta-hydroxylase/Dopamine beta-hydroxylase"	Dopamine beta-hydroxylase deficiency, 223360|Dopamine-beta-hydroxylase activity levels, plasma
WBGene00006563	teg-1	Y47D3A.27	III-8I13	ENSG00000169217	CD2BP2	6	Ensembl Compara 87-89|Homologene|InParanoid|OMA|OrthoInspector|OrthoMCL	SM00444	IPR003169 "GYF domain"
WBGene00006566	tgt-1	ZK829.6	IV-6I20	ENSG00000213339	QTRT1	6	Ensembl Compara 87-89|Homologene|InParanoid|OMA|OrthoInspector|OrthoMCL		IPR002616 "tRNA-guanine(15) transglycosylase-like"|IPR004803 "Queuine tRNA-ribosyltransferase"
WBGene00006567	tgt-2	Y39B6A.35	V-12K18	ENSG00000151576	QTRT2	6	Ensembl Compara 87-89|Homologene|InParanoid|OMA|OrthoInspector|OrthoMCL		IPR002616 "tRNA-guanine(15) transglycosylase-like"
WBGene00006568	thk-1	Y43C5A.5	IV-5O06	ENSG00000167900	TK1	6	Ensembl Compara 87-89|Homologene|InParanoid|OMA|OrthoInspector|OrthoMCL		IPR001267 "Thymidine kinase"|IPR027417 "P-loop containing nucleoside triphosphate hydrolase"
WBGene00006573	tin-10	Y66D12A.22		ENSG00000134809	TIMM10	6	Ensembl Compara 87-89|Homologene|InParanoid|OMA|OrthoInspector|OrthoMCL		IPR004217 "Tim10/DDP family zinc finger"|IPR027247 "Mitochondrial import inner membrane translocase subunit Tim10/Tim12"
WBGene00006575	tir-1	F13B10.1	III-1N20	ENSG00000004139	SARM1	6	Ensembl Compara 87-89|Homologene|InParanoid|OMA|OrthoInspector|OrthoMCL	SM00255|SM00454	IPR000157 "Toll/interleukin-1 receptor homology (TIR) domain"|IPR001660 "Sterile alpha motif domain"|IPR011989 "Armadillo-like helical"|IPR013761 "Sterile alpha motif/pointed domain"|IPR016024 "Armadillo-type fold"
WBGene00006578	tli-1	F25H2.1		ENSG00000078902	TOLLIP	6	Ensembl Compara 87-89|Homologene|InParanoid|OMA|OrthoInspector|OrthoMCL	SM00239|SM00546	IPR000008 "C2 domain"|IPR003892 "Ubiquitin system component Cue"|IPR009060 "UBA-like"
WBGene00006823	unc-94	C06A5.7	I-2F12	ENSG00000136842	TMOD1	6	Ensembl Compara 87-89|Homologene|InParanoid|OMA|OrthoInspector|OrthoMCL		IPR004934 "Tropomodulin"|IPR030137 "Tropomodulin, invertebrate"|IPR032675 "Leucine-rich repeat domain, L domain-like"
WBGene00006594	tom-1	M01A10.2	I-2D21|I-2D23	ENSG00000145087	STXBP5L	6	Ensembl Compara 87-89|Homologene|InParanoid|OMA|OrthoInspector|OrthoMCL	SM00320	IPR000664 "Lethal(2) giant larvae protein"|IPR001680 "WD40 repeat"|IPR013577 "Lethal giant larvae homologue 2"|IPR015943 "WD40/YVTN repeat-like-containing domain"|IPR017986 "WD40-repeat-containing domain"
WBGene00006595	top-1	M01E5.5	I-6B20	ENSG00000198900	TOP1	6	Ensembl Compara 87-89|Homologene|InParanoid|OMA|OrthoInspector|OrthoMCL	SM00435	IPR001631 "DNA topoisomerase I"|IPR008336 "DNA topoisomerase I, DNA binding, eukaryotic-type"|IPR011010 "DNA breaking-rejoining enzyme, catalytic core"|IPR013030 "DNA topoisomerase I, DNA binding, mixed alpha/beta motif, eukaryotic-type"|IPR013034 "DNA topoisomerase I, domain 1"|IPR013499 "DNA topoisomerase I, eukaryotic-type"|IPR013500 "DNA topoisomerase I, catalytic core, eukaryotic-type"|IPR01…	DNA topoisomerase I, camptothecin-resistant
WBGene00006599	tpa-1	B0545.1	IV-1C03|IV-1C07	ENSG00000163932	PRKCD	6	Ensembl Compara 87-89|Homologene|InParanoid|OMA|OrthoInspector|OrthoMCL	SM00109|SM00133|SM00220	IPR000008 "C2 domain"|IPR000719 "Protein kinase domain"|IPR000961 "AGC-kinase, C-terminal"|IPR002219 "Protein kinase C-like, phorbol ester/diacylglycerol-binding domain"|IPR011009 "Protein kinase-like domain"|IPR014376 "Protein kinase C, delta/epsilon/eta/theta types"|IPR017892 "Protein kinase, C-terminal"|IPR020454 "Diacylglycerol/phorbol-ester binding"	Autoimmune lymphoproliferative syndrome, type III, 615559
WBGene00006601	tpi-1	Y17G7B.7	II-8I11	ENSG00000111669	TPI1	6	Ensembl Compara 87-89|Homologene|InParanoid|OMA|OrthoInspector|OrthoMCL		IPR000652 "Triosephosphate isomerase"|IPR013785 "Aldolase-type TIM barrel"	Hemolytic anemia due to triosephosphate isomerase deficiency, 615512
WBGene00006609	tre-3	W05E10.4	V-14G18	ENSG00000118094	TREH	6	Ensembl Compara 87-89|Homologene|InParanoid|OMA|OrthoInspector|OrthoMCL		IPR001661 "Glycoside hydrolase, family 37"|IPR008928 "Six-hairpin glycosidase-like"	Trehalase deficiency, 612119
WBGene00006611	tre-5	C23H3.7	II-1C21	ENSG00000118094	TREH	6	Ensembl Compara 87-89|Homologene|InParanoid|OMA|OrthoInspector|OrthoMCL		IPR001661 "Glycoside hydrolase, family 37"|IPR008928 "Six-hairpin glycosidase-like"	Trehalase deficiency, 612119
WBGene00006613	trm-1	ZC376.5	V-14G19	ENSG00000104907	TRMT1	6	Ensembl Compara 87-89|Homologene|InParanoid|OMA|OrthoInspector|OrthoMCL	SM00356	IPR002905 "tRNA methyltransferase, Trm1"|IPR029063 "S-adenosyl-L-methionine-dependent methyltransferase"
WBGene00006615	trp-2	R06B10.4	III-8O16	ENSG00000133107	TRPC4	6	Ensembl Compara 87-89|Homologene|InParanoid|OMA|OrthoInspector|OrthoMCL	SM00248	IPR002110 "Ankyrin repeat"|IPR002153 "Transient receptor potential channel, canonical"|IPR004729 "Transient receptor potential channel"|IPR005821 "Ion transport domain"|IPR013555 "Transient receptor ion channel domain"|IPR020683 "Ankyrin repeat-containing domain"
WBGene00006617	tars-1	C47D12.6	II-7P06	ENSG00000113407	TARS	6	Ensembl Compara 87-89|Homologene|InParanoid|OMA|OrthoInspector|OrthoMCL	SM00863	IPR002314 "Aminoacyl-tRNA synthetase, class II (G/ P/ S/T)"|IPR002320 "Threonine-tRNA ligase, class IIa"|IPR004095 "TGS"|IPR004154 "Anticodon-binding"|IPR012675 "Beta-grasp domain"|IPR012676 "TGS-like"|IPR012947 "Threonyl/alanyl tRNA synthetase, SAD"|IPR018163 "Threonyl/alanyl tRNA synthetase, class II-like, putative editing domain"
WBGene00006626	tsn-1	F10G7.2	II-3P02	ENSG00000197157	SND1	6	Ensembl Compara 87-89|Homologene|InParanoid|OMA|OrthoInspector|OrthoMCL	SM00318|SM00333	IPR002999 "Tudor domain"|IPR016071 "Staphylococcal nuclease (SNase-like), OB-fold"|IPR016685 "RNA-induced silencing complex, nuclease component Tudor-SN"|IPR030481 "Staphylococcal nuclease domain-containing protein 1"
WBGene00006638	tsp-12	T14G10.6	IV-5I22	ENSG00000168785	TSPAN5	6	Ensembl Compara 87-89|Homologene|InParanoid|OMA|OrthoInspector|OrthoMCL		IPR000301 "Tetraspanin"|IPR008952 "Tetraspanin, EC2 domain"|IPR018499 "Tetraspanin/Peripherin"
WBGene00006647	tsr-1	F53G2.6	II-2H03	ENSG00000064419	TNPO3	6	Ensembl Compara 87-89|Homologene|InParanoid|OMA|OrthoInspector|OrthoMCL		IPR013598 "Exportin-1/Importin-beta-like"|IPR016024 "Armadillo-type fold"	Muscular dystrophy, limb-girdle, type 1F, 608423
WBGene00006696	twk-46	Y39B6A.19	V-16E22	ENSG00000135750	KCNK1	6	Ensembl Compara 87-89|Homologene|InParanoid|OMA|OrthoInspector|OrthoMCL		IPR003092 "Two pore domain potassium channel, TASK family"|IPR003280 "Two pore domain potassium channel"|IPR005408 "Two pore domain potassium channel, TWIK family"|IPR013099 "Potassium channel domain"
WBGene00006699	uba-1	C47E12.5	IV-5M23	ENSG00000130985	UBA1	6	Ensembl Compara 87-89|Homologene|InParanoid|OMA|OrthoInspector|OrthoMCL	SM00985	IPR000011 "Ubiquitin/SUMO-activating enzyme E1"|IPR000594 "THIF-type NAD/FAD binding fold"|IPR016040 "NAD(P)-binding domain"|IPR018075 "Ubiquitin-activating enzyme E1"|IPR018965 "Ubiquitin-activating enzyme E1, C-terminal"|IPR019572 "Ubiquitin-activating enzyme, catalytic cysteine domain"|IPR032418 "Ubiquitin-activating enzyme E1, FCCH domain"|IPR032420 "Ubiquitin-activating enzyme E1, four-helix…	Spinal muscular atrophy, X-linked 2, infantile, 301830
WBGene00006701	ubc-1	C35B1.1	IV-2E17	ENSG00000077721	UBE2A	6	Ensembl Compara 87-89|Homologene|InParanoid|OMA|OrthoInspector|OrthoMCL	SM00212	IPR000608 "Ubiquitin-conjugating enzyme E2"|IPR016135 "Ubiquitin-conjugating enzyme/RWD-like"	Mental retardation, X-linked syndromic, Nascimento-type, 300860
WBGene00006702	ubc-3	Y71G12B.15	I-8I23	ENSG00000107341	UBE2R2	6	Ensembl Compara 87-89|Homologene|InParanoid|OMA|OrthoInspector|OrthoMCL	SM00212	IPR000608 "Ubiquitin-conjugating enzyme E2"|IPR016135 "Ubiquitin-conjugating enzyme/RWD-like"
WBGene00006705	ubc-8	Y94H6A.6	IV-10A11	ENSG00000186591	UBE2H	6	Ensembl Compara 87-89|Homologene|InParanoid|OMA|OrthoInspector|OrthoMCL	SM00212	IPR000608 "Ubiquitin-conjugating enzyme E2"|IPR016135 "Ubiquitin-conjugating enzyme/RWD-like"
WBGene00006707	ubc-12	R09B3.4	I-5P22	ENSG00000184182	UBE2F	6	Ensembl Compara 87-89|Homologene|InParanoid|OMA|OrthoInspector|OrthoMCL	SM00212	IPR000608 "Ubiquitin-conjugating enzyme E2"|IPR016135 "Ubiquitin-conjugating enzyme/RWD-like"
WBGene00006708	ubc-13	Y54G2A.31		ENSG00000177889	UBE2N	6	Ensembl Compara 87-89|Homologene|InParanoid|OMA|OrthoInspector|OrthoMCL	SM00212	IPR000608 "Ubiquitin-conjugating enzyme E2"|IPR016135 "Ubiquitin-conjugating enzyme/RWD-like"
WBGene00006709	ubc-14	Y87G2A.9		ENSG00000184787	UBE2G2	6	Ensembl Compara 87-89|Homologene|InParanoid|OMA|OrthoInspector|OrthoMCL	SM00212	IPR000608 "Ubiquitin-conjugating enzyme E2"|IPR016135 "Ubiquitin-conjugating enzyme/RWD-like"
WBGene00006711	ubc-16	Y54E5B.4	I-7I16	ENSG00000104343	UBE2W	6	Ensembl Compara 87-89|Homologene|InParanoid|OMA|OrthoInspector|OrthoMCL	SM00212	IPR000608 "Ubiquitin-conjugating enzyme E2"|IPR016135 "Ubiquitin-conjugating enzyme/RWD-like"
WBGene00006715	ubc-20	F40G9.3	III-1G07	ENSG00000078140	UBE2K	6	Ensembl Compara 87-89|Homologene|InParanoid|OMA|OrthoInspector|OrthoMCL	SM00165|SM00212	IPR000608 "Ubiquitin-conjugating enzyme E2"|IPR009060 "UBA-like"|IPR016135 "Ubiquitin-conjugating enzyme/RWD-like"
WBGene00006716	ubc-21	C06E2.3	X-4D01	ENSG00000078140	UBE2K	6	Ensembl Compara 87-89|Homologene|InParanoid|OMA|OrthoInspector|OrthoMCL	SM00165|SM00212	IPR000608 "Ubiquitin-conjugating enzyme E2"|IPR009060 "UBA-like"|IPR016135 "Ubiquitin-conjugating enzyme/RWD-like"
WBGene00006720	ubc-25	F25H2.8	I-5E24	ENSG00000140367	UBE2Q2	6	Ensembl Compara 87-89|Homologene|InParanoid|OMA|OrthoInspector|OrthoMCL	SM00212	IPR000608 "Ubiquitin-conjugating enzyme E2"|IPR016135 "Ubiquitin-conjugating enzyme/RWD-like"
WBGene00006724	ubh-4	C08B11.7	II-5N18	ENSG00000116750	UCHL5	6	Ensembl Compara 87-89|Homologene|InParanoid|OMA|OrthoInspector|OrthoMCL		IPR001578 "Peptidase C12, ubiquitin carboxyl-terminal hydrolase"|IPR017390 "Ubiquitinyl hydrolase, UCH37 type"
WBGene00006726	ubl-5	F46F11.4	I-2H01	ENSG00000198258	UBL5	6	Ensembl Compara 87-89|Homologene|InParanoid|OMA|OrthoInspector|OrthoMCL		IPR029071 "Ubiquitin-related domain"
WBGene00006728	ubq-2	ZK1010.1	III-6B07	ENSG00000221983	UBA52	6	Ensembl Compara 87-89|Homologene|InParanoid|OMA|OrthoInspector|OrthoMCL	SM00213|SM01377	IPR000626 "Ubiquitin domain"|IPR001975 "Ribosomal protein L40e"|IPR019956 "Ubiquitin"|IPR029071 "Ubiquitin-related domain"
WBGene00006729	ucp-4	K07B1.3	V-6H01	ENSG00000153291	SLC25A27	6	Ensembl Compara 87-89|Homologene|InParanoid|OMA|OrthoInspector|OrthoMCL		IPR018108 "Mitochondrial substrate/solute carrier"|IPR023395 "Mitochondrial carrier domain"
WBGene00006730	uev-1	F39B2.2	I-7G10	ENSG00000244687	UBE2V1	6	Ensembl Compara 87-89|Homologene|InParanoid|OMA|OrthoInspector|OrthoMCL	SM00212	IPR000608 "Ubiquitin-conjugating enzyme E2"|IPR016135 "Ubiquitin-conjugating enzyme/RWD-like"
WBGene00006745	unc-5	B0273.4	IV-2L02	ENSG00000107731	UNC5B	6	Ensembl Compara 87-89|Homologene|InParanoid|OMA|OrthoInspector|OrthoMCL	SM00005|SM00209|SM00218|SM00408|SM00409	IPR000488 "Death domain"|IPR000884 "Thrombospondin type-1 (TSP1) repeat"|IPR000906 "ZU5 domain"|IPR003598 "Immunoglobulin subtype 2"|IPR003599 "Immunoglobulin subtype"|IPR007110 "Immunoglobulin-like domain"|IPR011029 "Death-like domain"|IPR013783 "Immunoglobulin-like fold"
WBGene00006746	unc-6	F41C6.1	X-3L09	ENSG00000065320	NTN1	6	Ensembl Compara 87-89|Homologene|InParanoid|OMA|OrthoInspector|OrthoMCL	SM00136|SM00180|SM00643	IPR002049 "Laminin EGF domain"|IPR008211 "Laminin, N-terminal"|IPR008993 "Tissue inhibitor of metalloproteinases-like, OB-fold"|IPR018933 "Netrin module, non-TIMP type"
WBGene00006755	unc-16	ZK1098.10	III-5I05	ENSG00000008294	SPAG9	6	Ensembl Compara 87-89|Homologene|InParanoid|OMA|OrthoInspector|OrthoMCL		IPR011047 "Quinoprotein alcohol dehydrogenase-like superfamily"|IPR015943 "WD40/YVTN repeat-like-containing domain"|IPR017986 "WD40-repeat-containing domain"|IPR019143 "JNK/Rab-associated protein-1, N-terminal"|IPR032486 "JNK-interacting protein, leucine zipper II"
WBGene00006757	unc-18	F27D9.1	X-3P18	ENSG00000136854	STXBP1	6	Ensembl Compara 87-89|Homologene|InParanoid|OMA|OrthoInspector|OrthoMCL		IPR001619 "Sec1-like protein"|IPR027482 "Sec1-like, domain 2"	Epileptic encephalopathy, early infantile, 4, 612164
WBGene00006762	unc-25	Y37D8A.23		ENSG00000128683	GAD1	6	Ensembl Compara 87-89|Homologene|InParanoid|OMA|OrthoInspector|OrthoMCL		IPR002129 "Pyridoxal phosphate-dependent decarboxylase"|IPR015421 "Pyridoxal phosphate-dependent transferase, major region, subdomain 1"|IPR015422 "Pyridoxal phosphate-dependent transferase, major region, subdomain 2"|IPR015424 "Pyridoxal phosphate-dependent transferase"	Cerebral palsy, spastic quadriplegic, 1, 603513
WBGene00006763	unc-26	JC8.10	IV-7E19	ENSG00000159082	SYNJ1	6	Ensembl Compara 87-89|Homologene|InParanoid|OMA|OrthoInspector|OrthoMCL	SM00128|SM01165	IPR000300 "Inositol polyphosphate-related phosphatase"|IPR002013 "SAC domain"|IPR005135 "Endonuclease/exonuclease/phosphatase"|IPR012677 "Nucleotide-binding alpha-beta plait domain"|IPR015047 "Domain of unknown function DUF1866"	Epileptic encephalopathy, early infantile, 53, 617389|Parkinson disease 20, early-onset, 615530
WBGene00006767	unc-31	ZK897.1	IV-9B02	ENSG00000163618	CADPS	6	Ensembl Compara 87-89|Homologene|InParanoid|OMA|OrthoInspector|OrthoMCL	SM00233|SM01145	IPR000008 "C2 domain"|IPR001849 "Pleckstrin homology domain"|IPR010439 "Calcium-dependent secretion activator domain"|IPR011993 "PH domain-like"|IPR033227 "Calcium-dependent secretion activator"
WBGene00006771	tln-1	Y71G12B.11	I-8K19|I-8K21|I-8M01	ENSG00000171914	TLN2	6	Ensembl Compara 87-89|Homologene|InParanoid|OMA|OrthoInspector|OrthoMCL	SM00295|SM00307|SM01244	IPR002404 "IRS-type PTB domain"|IPR002558 "I/LWEQ domain"|IPR006077 "Vinculin/alpha-catenin"|IPR011993 "PH domain-like"|IPR014352 "FERM/acyl-CoA-binding protein, 3-helical bundle"|IPR015009 "Vinculin-binding site-containing domain"|IPR015224 "Talin, central"|IPR018979 "FERM, N-terminal"|IPR019748 "FERM central domain"|IPR019749 "Band 4.1 domain"|IPR029071 "Ubiquitin-related domain"|IPR032425 "Tal…
WBGene00006776	unc-40	T19B4.7	I-2J21|I-2J23	ENSG00000187323	DCC	6	Ensembl Compara 87-89|Homologene|InParanoid|OMA|OrthoInspector|OrthoMCL	SM00060|SM00408|SM00409	IPR003598 "Immunoglobulin subtype 2"|IPR003599 "Immunoglobulin subtype"|IPR003961 "Fibronectin type III"|IPR007110 "Immunoglobulin-like domain"|IPR013098 "Immunoglobulin I-set"|IPR013783 "Immunoglobulin-like fold"	Colorectal cancer, somatic, 114500|Esophageal carcinoma, somatic, 133239|Gaze palsy, familial horizontal, with progressive scoliosis, 2, 617542|Mirror movements 1 and/or agenesis of the corpus callosum, 157600
WBGene00006781	unc-45	F30H5.1	III-1K05|III-7C12	ENSG00000141161	UNC45B	6	Ensembl Compara 87-89|Homologene|InParanoid|OMA|OrthoInspector|OrthoMCL	SM00028|SM00185	IPR011989 "Armadillo-like helical"|IPR011990 "Tetratricopeptide-like helical domain"|IPR016024 "Armadillo-type fold"|IPR019734 "Tetratricopeptide repeat"|IPR024660 "UNC-45/Cro1/She4, central domain"	Cataract 43, 616279
WBGene00006785	unc-50	T07A5.2	III-5D19	ENSG00000115446	UNC50	6	Ensembl Compara 87-89|Homologene|InParanoid|OMA|OrthoInspector|OrthoMCL		IPR007881 "UNC-50"
WBGene00006790	unc-55	F55D12.4	I-3L14|I-3L18	ENSG00000175745	NR2F1	6	Ensembl Compara 87-89|Homologene|InParanoid|OMA|OrthoInspector|OrthoMCL	SM00399|SM00430	IPR000536 "Nuclear hormone receptor, ligand-binding domain"|IPR001628 "Zinc finger, nuclear hormone receptor-type"|IPR001723 "Nuclear hormone receptor"|IPR003068 "Transcription factor COUP"|IPR013088 "Zinc finger, NHR/GATA-type"	Bosch-Boonstra-Schaaf optic atrophy syndrome, 615722
WBGene00006791	unc-57	T04D1.3		ENSG00000140600	SH3GL3	6	Ensembl Compara 87-89|Homologene|InParanoid|OMA|OrthoInspector|OrthoMCL	SM00326|SM00721	IPR001452 "SH3 domain"|IPR004148 "BAR domain"|IPR027267 "Arfaptin homology (AH) domain/BAR domain"|IPR028501 "Endophilin-A"
WBGene00006793	unc-59	W09C5.2	I-6N04	ENSG00000122545	SEPT7	6	Ensembl Compara 87-89|Homologene|InParanoid|OMA|OrthoInspector|OrthoMCL		IPR016491 "Septin"|IPR027417 "P-loop containing nucleoside triphosphate hydrolase"|IPR030379 "Septin-type guanine nucleotide-binding (G) domain"
WBGene00006795	unc-61	Y50E8A.4	V-15E06	ENSG00000125354	SEPT6	6	Ensembl Compara 87-89|Homologene|InParanoid|OMA|OrthoInspector|OrthoMCL		IPR016491 "Septin"|IPR027417 "P-loop containing nucleoside triphosphate hydrolase"|IPR030379 "Septin-type guanine nucleotide-binding (G) domain"
WBGene00006801	unc-68	K11C4.5	V-13M04	ENSG00000198626	RYR2	6	Ensembl Compara 87-89|Homologene|InParanoid|OMA|OrthoInspector|OrthoMCL	SM00449|SM00472	IPR000699 "RIH (RyR and IP3R Homology) domain"|IPR002048 "EF-hand domain"|IPR003032 "Ryanodine receptor Ryr"|IPR003877 "SPRY domain"|IPR005821 "Ion transport domain"|IPR009460 "Ryanodine Receptor TM 4-6"|IPR011992 "EF-hand domain pair"|IPR013320 "Concanavalin A-like lectin/glucanase domain"|IPR013333 "Ryanodine receptor"|IPR013662 "RyR/IP3R Homology associated domain"|IPR014821 "Inositol 1,4,5-tr…	Arrhythmogenic right ventricular dysplasia 2, 600996|Ventricular tachycardia, catecholaminergic polymorphic, 1, 604772
WBGene00006803	unc-70	K11C4.3	V-5C11	ENSG00000115306	SPTBN1	6	Ensembl Compara 87-89|Homologene|InParanoid|OMA|OrthoInspector|OrthoMCL	SM00033|SM00150|SM00233	IPR001605 "Pleckstrin homology domain, spectrin-type"|IPR001715 "Calponin homology domain"|IPR001849 "Pleckstrin homology domain"|IPR002017 "Spectrin repeat"|IPR011993 "PH domain-like"|IPR016343 "Spectrin, beta subunit"|IPR018159 "Spectrin/alpha-actinin"
WBGene00006805	unc-73	F55C7.7	I-1B16|I-1B18|I-1B20	ENSG00000038382	TRIO	6	Ensembl Compara 87-89|Homologene|InParanoid|OMA|OrthoInspector|OrthoMCL	SM00150|SM00220|SM00233|SM00325|SM00326|SM00408|SM00409|SM00516	IPR000219 "Dbl homology (DH) domain"|IPR001251 "CRAL-TRIO lipid binding domain"|IPR001452 "SH3 domain"|IPR001849 "Pleckstrin homology domain"|IPR003961 "Fibronectin type III"|IPR007110 "Immunoglobulin-like domain"|IPR011993 "PH domain-like"|IPR013098 "Immunoglobulin I-set"|IPR013783 "Immunoglobulin-like fold"	Mental retardation, autosomal dominant 44, 617061
WBGene00006808	unc-76	C01G10.11	V-9J14	ENSG00000171055	FEZ2	6	Ensembl Compara 87-89|Homologene|InParanoid|OMA|OrthoInspector|OrthoMCL		IPR011680 "Fasciculation and elongation protein zeta, FEZ"
WBGene00006810	unc-78	C04F6.4	X-2A18	ENSG00000071127	WDR1	6	Ensembl Compara 87-89|Homologene|InParanoid|OMA|OrthoInspector|OrthoMCL	SM00320	IPR001680 "WD40 repeat"|IPR015943 "WD40/YVTN repeat-like-containing domain"|IPR017986 "WD40-repeat-containing domain"|IPR020472 "G-protein beta WD-40 repeat"|IPR024977 "Anaphase-promoting complex subunit 4, WD40 domain"
WBGene00010685	aipl-1	K08F9.2	V-9L16	ENSG00000071127	WDR1	6	Ensembl Compara 87-89|Homologene|InParanoid|OMA|OrthoInspector|OrthoMCL	SM00320	IPR001680 "WD40 repeat"|IPR015943 "WD40/YVTN repeat-like-containing domain"|IPR017986 "WD40-repeat-containing domain"|IPR020472 "G-protein beta WD-40 repeat"|IPR024977 "Anaphase-promoting complex subunit 4, WD40 domain"
WBGene00007277	asfl-1	C03D6.5	I-4F24	ENSG00000111875	ASF1A	6	Ensembl Compara 87-89|Homologene|InParanoid|OMA|OrthoInspector|OrthoMCL		IPR006818 "Histone chaperone ASF1-like"|IPR017282 "Histone deposition protein Asf1"
WBGene00006836	unc-112	C47E8.7	V-9L03	ENSG00000073712	FERMT2	6	Ensembl Compara 87-89|Homologene|InParanoid|OMA|OrthoInspector|OrthoMCL	SM00233|SM00295	IPR001849 "Pleckstrin homology domain"|IPR011993 "PH domain-like"|IPR014352 "FERM/acyl-CoA-binding protein, 3-helical bundle"|IPR019748 "FERM central domain"|IPR019749 "Band 4.1 domain"
WBGene00006840	unc-116	R05D3.7	III-4O16	ENSG00000170759	KIF5B	6	Ensembl Compara 87-89|Homologene|InParanoid|OMA|OrthoInspector|OrthoMCL	SM00129	IPR001752 "Kinesin motor domain"|IPR027417 "P-loop containing nucleoside triphosphate hydrolase"|IPR027640 "Kinesin-like protein"
WBGene00006843	unc-119	M142.1	III-5F06|III-8P24	ENSG00000175970	UNC119B	6	Ensembl Compara 87-89|Homologene|InParanoid|OMA|OrthoInspector|OrthoMCL		IPR008015 "GMP phosphodiesterase, delta subunit"|IPR014756 "Immunoglobulin E-set"
WBGene00006856	usp-14	C13B4.2	II-10C06	ENSG00000101557	USP14	6	Ensembl Compara 87-89|Homologene|InParanoid|OMA|OrthoInspector|OrthoMCL	SM00213	IPR000626 "Ubiquitin domain"|IPR001394 "Peptidase C19, ubiquitin carboxyl-terminal hydrolase"|IPR029071 "Ubiquitin-related domain"
WBGene00006887	vav-1	C35B8.2	X-4L07	ENSG00000134215	VAV3	6	Ensembl Compara 87-89|Homologene|InParanoid|OMA|OrthoInspector|OrthoMCL	SM00033|SM00109|SM00233|SM00252|SM00325|SM00326	IPR000219 "Dbl homology (DH) domain"|IPR000980 "SH2 domain"|IPR001452 "SH3 domain"|IPR001715 "Calponin homology domain"|IPR001849 "Pleckstrin homology domain"|IPR002219 "Protein kinase C-like, phorbol ester/diacylglycerol-binding domain"|IPR011511 "Variant SH3 domain"|IPR011993 "PH domain-like"|IPR013315 "Spectrin alpha chain, SH3 domain"
WBGene00006889	pfd-3	T06G6.9	I-6B05	ENSG00000155959	VBP1	6	Ensembl Compara 87-89|Homologene|InParanoid|OMA|OrthoInspector|OrthoMCL		IPR004127 "Prefoldin alpha-like"|IPR009053 "Prefoldin"|IPR016655 "Prefoldin subunit 3"
WBGene00006890	vem-1	K07E3.8	X-4K19	ENSG00000101856	PGRMC1	6	Ensembl Compara 87-89|Homologene|InParanoid|OMA|OrthoInspector|OrthoMCL	SM01117	IPR001199 "Cytochrome b5-like heme/steroid binding domain"
WBGene00006912	vha-3	Y38F2AL.4	IV-8M18|IV-8O02|IV-9O15	ENSG00000185883	ATP6V0C	6	Ensembl Compara 87-89|Homologene|InParanoid|OMA|OrthoInspector|OrthoMCL		IPR000245 "V-ATPase proteolipid subunit"|IPR002379 "V-ATPase proteolipid subunit C-like domain"|IPR011555 "V-ATPase proteolipid subunit C, eukaryotic"
WBGene00006913	vha-4	T01H3.1	II-5J16	ENSG00000117410	ATP6V0B	6	Ensembl Compara 87-89|Homologene|InParanoid|OMA|OrthoInspector|OrthoMCL		IPR002379 "V-ATPase proteolipid subunit C-like domain"
WBGene00006917	vha-8	C17H12.14	IV-3I08	ENSG00000131100	ATP6V1E1	6	Ensembl Compara 87-89|Homologene|InParanoid|OMA|OrthoInspector|OrthoMCL		IPR002842 "ATPase, V1/A1 complex, subunit E"	Cutis laxa, autosomal recessive, type IIC, 617402
WBGene00006918	vha-9	ZK970.4	II-7A14	ENSG00000128524	ATP6V1F	6	Ensembl Compara 87-89|Homologene|InParanoid|OMA|OrthoInspector|OrthoMCL		IPR005772 "ATPase, V1 complex, subunit F, eukaryotic"|IPR008218 "ATPase, V1 complex, subunit F"
WBGene00006919	vha-10	F46F11.5	I-2H03	ENSG00000136888	ATP6V1G1	6	Ensembl Compara 87-89|Homologene|InParanoid|OMA|OrthoInspector|OrthoMCL		IPR005124 "Vacuolar (H+)-ATPase G subunit"
WBGene00006932	vps-34	B0025.1	I-2F20	ENSG00000078142	PIK3C3	6	Ensembl Compara 87-89|Homologene|InParanoid|OMA|OrthoInspector|OrthoMCL	SM00142|SM00145|SM00146	IPR000008 "C2 domain"|IPR000403 "Phosphatidylinositol 3-/4-kinase, catalytic domain"|IPR001263 "Phosphoinositide 3-kinase, accessory (PIK) domain"|IPR002420 "Phosphatidylinositol 3-kinase, C2 domain"|IPR008290 "Phosphatidylinositol 3-kinase, Vps34 type"|IPR011009 "Protein kinase-like domain"|IPR015433 "Phosphatidylinositol Kinase"|IPR016024 "Armadillo-type fold"
WBGene00006933	vps-35	F59G1.3	II-10C07|II-4P24	ENSG00000069329	VPS35	6	Ensembl Compara 87-89|Homologene|InParanoid|OMA|OrthoInspector|OrthoMCL		IPR005378 "Vacuolar protein sorting-associated protein 35"|IPR016024 "Armadillo-type fold"	Parkinson disease 17, 614203
WBGene00006934	vps-54	T21C9.2	V-7G02	ENSG00000143952	VPS54	6	Ensembl Compara 87-89|Homologene|InParanoid|OMA|OrthoInspector|OrthoMCL		IPR012501 "Vps54-likeVacuolar protein sorting-associated protein 54, C-terminal"|IPR019515 "Vacuolar protein sorting-associated protein 54, N-terminal"
WBGene00006937	wah-1	Y56A3A.32	III-6J08|III-6L02|III-6M07	ENSG00000156709	AIFM1	6	Ensembl Compara 87-89|Homologene|InParanoid|OMA|OrthoInspector|OrthoMCL	SM01353	IPR004099 "Pyridine nucleotide-disulphide oxidoreductase, dimerisation domain"|IPR016156 "FAD/NAD-linked reductase, dimerisation domain"|IPR023753 "FAD/NAD(P)-binding domain"|IPR029324 "Mitochondrial apoptosis-inducing factor, C-terminal domain"	Combined oxidative phosphorylation deficiency 6, 300816|Cowchock syndrome, 310490|Deafness, X-linked 5, 300614
WBGene00006945	wars-1	Y80D3A.1	V-12C22	ENSG00000140105	WARS	6	Ensembl Compara 87-89|Homologene|InParanoid|OMA|OrthoInspector|OrthoMCL	SM00991	IPR002305 "Aminoacyl-tRNA synthetase, class Ic"|IPR002306 "Tryptophan-tRNA ligase"|IPR014729 "Rossmann-like alpha/beta/alpha sandwich fold"	Neuronopathy, distal hereditary motor, type IX, 617721
WBGene00006946	prx-10	C34E10.4	III-2B12	ENSG00000116874	WARS2	6	Ensembl Compara 87-89|Homologene|InParanoid|OMA|OrthoInspector|OrthoMCL		IPR001841 "Zinc finger, RING-type"|IPR002305 "Aminoacyl-tRNA synthetase, class Ic"|IPR002306 "Tryptophan-tRNA ligase"|IPR006845 "Pex, N-terminal"|IPR013083 "Zinc finger, RING/FYVE/PHD-type"|IPR014729 "Rossmann-like alpha/beta/alpha sandwich fold"|IPR025654 "Peroxisome biogenesis factor 10"|IPR027370 "RING-type zinc-finger, LisH dimerisation motif"	Neurodevelopmental disorder, mitochondrial, with abnormal movements and lactic acidosis, with or without
WBGene00006960	xbx-1	F02D8.3		ENSG00000138036	DYNC2LI1	6	Ensembl Compara 87-89|Homologene|InParanoid|OMA|OrthoInspector|OrthoMCL		IPR022780 "Dynein family light intermediate chain"|IPR027417 "P-loop containing nucleoside triphosphate hydrolase"	Short-rib thoracic dysplasia 15 with polydactyly, 617088
WBGene00006963	xpa-1	K07G5.2	I-3D07	ENSG00000136936	XPA	6	Ensembl Compara 87-89|Homologene|InParanoid|OMA|OrthoInspector|OrthoMCL		IPR000465 "XPA"|IPR009061 "Putative DNA-binding domain"|IPR022652 "Zinc finger, XPA-type, conserved site"|IPR022656 "XPA C- terminal"	Xeroderma pigmentosum, group A, 278700
WBGene00006968	yars-2	K08F11.4	IV-2M10	ENSG00000139131	YARS2	6	Ensembl Compara 87-89|Homologene|InParanoid|OMA|OrthoInspector|OrthoMCL		IPR002305 "Aminoacyl-tRNA synthetase, class Ic"|IPR002307 "Tyrosine-tRNA ligase"|IPR002942 "RNA-binding S4 domain"|IPR014729 "Rossmann-like alpha/beta/alpha sandwich fold"|IPR024088 "Tyrosine-tRNA ligase, bacterial-type"	Myopathy, lactic acidosis, and sideroblastic anemia 2, 613561
WBGene00006993	zyg-8	Y79H2A.11	III-6C10	ENSG00000133083	DCLK1	6	Ensembl Compara 87-89|Homologene|InParanoid|OMA|OrthoInspector|OrthoMCL	SM00220|SM00537	IPR000719 "Protein kinase domain"|IPR003533 "Doublecortin domain"|IPR011009 "Protein kinase-like domain"|IPR020636 "Calcium/calmodulin-dependent/calcium-dependent protein kinase"
WBGene00006996	zyg-11	C08B11.1	II-5N06	ENSG00000162378	ZYG11B	6	Ensembl Compara 87-89|Homologene|InParanoid|OMA|OrthoInspector|OrthoMCL		IPR011989 "Armadillo-like helical"|IPR016024 "Armadillo-type fold"|IPR032675 "Leucine-rich repeat domain, L domain-like"
WBGene00007000	tufm-1	Y71H2AM.23	III-7I08	ENSG00000178952	TUFM	6	Ensembl Compara 87-89|Homologene|InParanoid|OMA|OrthoInspector|OrthoMCL		IPR000795 "Transcription factor, GTP-binding domain"|IPR004160 "Translation elongation factor EFTu/EF1A, C-terminal"|IPR004161 "Translation elongation factor EFTu-like, domain 2"|IPR005225 "Small GTP-binding protein domain"|IPR009000 "Translation protein, beta-barrel domain"|IPR009001 "Translation elongation factor EF1A/initiation factor IF2gamma, C-terminal"|IPR027417 "P-loop containing nucleosi…	Combined oxidative phosphorylation deficiency 4, 610678
WBGene00007007	mak-2	C44C8.6	IV-1G22	ENSG00000114738	MAPKAPK3	6	Ensembl Compara 87-89|Homologene|InParanoid|OMA|OrthoInspector|OrthoMCL	SM00220	IPR000719 "Protein kinase domain"|IPR011009 "Protein kinase-like domain"|IPR027442 "MAP kinase activated protein kinase, C-terminal domain"	Macular dystrophy, patterned, 3, 617111
WBGene00007009	wwp-1	Y65B4BR.4	I-8A05|I-8A13|I-8A15	ENSG00000123124	WWP1	6	Ensembl Compara 87-89|Homologene|InParanoid|OMA|OrthoInspector|OrthoMCL	SM00119|SM00239|SM00456	IPR000008 "C2 domain"|IPR000569 "HECT domain"|IPR001202 "WW domain"
WBGene00007010	alx-1	R10E12.1	III-5I08	ENSG00000170248	PDCD6IP	6	Ensembl Compara 87-89|Homologene|InParanoid|OMA|OrthoInspector|OrthoMCL	SM01041	IPR004328 "BRO1 domain"|IPR025304 "ALIX V-shaped domain"
WBGene00007014	mdt-10	T09A5.6	II-5J02	ENSG00000133398	MED10	6	Ensembl Compara 87-89|Homologene|InParanoid|OMA|OrthoInspector|OrthoMCL		IPR019145 "Mediator complex, subunit Med10"
WBGene00007017	mdt-17	Y113G7B.18	V-12N10	ENSG00000042429	MED17	6	Ensembl Compara 87-89|Homologene|InParanoid|OMA|OrthoInspector|OrthoMCL			Microcephaly, postnatal progressive, with seizures and brain atrophy, 613668
WBGene00007018	mdt-18	C55B7.9	I-3K09	ENSG00000130772	MED18	6	Ensembl Compara 87-89|Homologene|InParanoid|OMA|OrthoInspector|OrthoMCL		IPR019095 "Mediator complex, subunit Med18, metazoa/fungi"
WBGene00007020	mdt-20	Y104H12D.1		ENSG00000124641	MED20	6	Ensembl Compara 87-89|Homologene|InParanoid|OMA|OrthoInspector|OrthoMCL		IPR013921 "Mediator complex, subunit Med20"
WBGene00007021	immp-1	C24H11.6	III-9C07	ENSG00000148950	IMMP1L	6	Ensembl Compara 87-89|Homologene|InParanoid|OMA|OrthoInspector|OrthoMCL		IPR000223 "Peptidase S26A, signal peptidase I"|IPR015927 "Peptidase S24/S26A/S26B/S26C"|IPR019759 "Peptidase S24/S26A/S26B"|IPR028360 "Peptidase S24/S26, beta-ribbon domain"
WBGene00007028	trr-1	C47D12.1	II-7N20	ENSG00000196367	TRRAP	6	Ensembl Compara 87-89|Homologene|InParanoid|OMA|OrthoInspector|OrthoMCL	SM00146|SM01343	IPR000403 "Phosphatidylinositol 3-/4-kinase, catalytic domain"|IPR011009 "Protein kinase-like domain"|IPR011989 "Armadillo-like helical"|IPR016024 "Armadillo-type fold"|IPR033317 "Transcription-associated protein 1"
WBGene00007029	mys-1	VC5.4	V-5I09	ENSG00000172977	KAT5	6	Ensembl Compara 87-89|Homologene|InParanoid|OMA|OrthoInspector|OrthoMCL	SM00298	IPR000953 "Chromo/chromo shadow domain"|IPR002717 "Histone acetyltransferase domain, MYST-type"|IPR016181 "Acyl-CoA N-acyltransferase"|IPR016197 "Chromo domain-like"|IPR025995 "RNA binding activity-knot of a chromodomain"
WBGene00007042	pbrm-1	C26C6.1	I-3P13	ENSG00000163939	PBRM1	6	Ensembl Compara 87-89|Homologene|InParanoid|OMA|OrthoInspector|OrthoMCL	SM00297|SM00398|SM00439	IPR001025 "Bromo adjacent homology (BAH) domain"|IPR001487 "Bromodomain"|IPR009071 "High mobility group box domain"|IPR015880 "Zinc finger, C2H2-like"
WBGene00007043	tag-179	T24D1.4	I-5A11	ENSG00000175548	ALG10B	6	Ensembl Compara 87-89|Homologene|InParanoid|OMA|OrthoInspector|OrthoMCL		IPR016900 "Alpha-2-glucosyltransferase Alg10"
WBGene00007048	nfx-1	C16A3.7	III-3K10	ENSG00000086102	NFX1	6	Ensembl Compara 87-89|Homologene|InParanoid|OMA|OrthoInspector|OrthoMCL	SM00184|SM00393|SM00438	IPR000967 "Zinc finger, NF-X1-type"|IPR001374 "R3H domain"
WBGene00007054	scpl-1	B0379.4	I-5E11	ENSG00000144579	CTDSP1	6	Ensembl Compara 87-89|Homologene|InParanoid|OMA|OrthoInspector|OrthoMCL	SM00577	IPR004274 "FCP1 homology domain"|IPR011948 "Dullard phosphatase domain, eukaryotic"|IPR023214 "HAD-like domain"
WBGene00007055	tag-196	F41E6.6	V-6K19	ENSG00000174080	CTSF	6	Ensembl Compara 87-89|Homologene|InParanoid|OMA|OrthoInspector|OrthoMCL	SM00645|SM00848	IPR000010 "Cystatin domain"|IPR000668 "Peptidase C1A, papain C-terminal"|IPR013128 "Peptidase C1A"|IPR013201 "Cathepsin propeptide inhibitor domain (I29)"	Ceroid lipofuscinosis, neuronal, 13, Kufs type, 615362
WBGene00011440	sfxn-1.5	T04F8.1	X-5F21	ENSG00000164466	SFXN1	6	Ensembl Compara 87-89|Homologene|InParanoid|OMA|OrthoInspector|OrthoMCL		IPR004686 "Tricarboxylate/iron carrier"
WBGene00007099	trx-2	B0024.9	V-7M01	ENSG00000100348	TXN2	6	Ensembl Compara 87-89|Homologene|InParanoid|OMA|OrthoInspector|OrthoMCL		IPR005746 "Thioredoxin"|IPR012336 "Thioredoxin-like fold"|IPR013766 "Thioredoxin domain"	Combined oxidative phosphorylation deficiency 29, 616811
WBGene00007102		B0024.13	V-7M09	ENSG00000128039	SRD5A3	6	Ensembl Compara 87-89|Homologene|InParanoid|OMA|OrthoInspector|OrthoMCL		IPR001104 "3-oxo-5-alpha-steroid 4-dehydrogenase, C-terminal"	Congenital disorder of glycosylation, type Iq, 612379|Kahrizi syndrome, 612713
WBGene00007103	crm-1	B0024.14	V-7M11	ENSG00000150938	CRIM1	6	Ensembl Compara 87-89|Homologene|InParanoid|OMA|OrthoInspector|OrthoMCL	SM00121|SM00214|SM00215	IPR000867 "Insulin-like growth factor-binding protein, IGFBP"|IPR001007 "VWFC domain"|IPR004094 "Antistasin-like domain"|IPR009030 "Growth factor receptor cysteine-rich domain"
WBGene00007108	gspd-1	B0035.5	IV-6C17	ENSG00000160211	G6PD	6	Ensembl Compara 87-89|Homologene|InParanoid|OMA|OrthoInspector|OrthoMCL		IPR001282 "Glucose-6-phosphate dehydrogenase"|IPR016040 "NAD(P)-binding domain"|IPR022674 "Glucose-6-phosphate dehydrogenase, NAD-binding"|IPR022675 "Glucose-6-phosphate dehydrogenase, C-terminal"	Hemolytic anemia, G6PD deficient (favism), 300908|Resistance to malaria due to G6PD deficiency, 611162
WBGene00007111	sart-3	B0035.12	IV-6E07	ENSG00000075856	SART3	6	Ensembl Compara 87-89|Homologene|InParanoid|OMA|OrthoInspector|OrthoMCL	SM00360|SM00386	IPR000504 "RNA recognition motif domain"|IPR003107 "HAT (Half-A-TPR) repeat"|IPR008669 "LSM-interacting domain"|IPR011990 "Tetratricopeptide-like helical domain"|IPR012677 "Nucleotide-binding alpha-beta plait domain"
WBGene00007114	mttu-1	B0035.16	IV-6E15	ENSG00000100416	TRMU	6	Ensembl Compara 87-89|Homologene|InParanoid|OMA|OrthoInspector|OrthoMCL		IPR004506 "tRNA-specific 2-thiouridylase"|IPR014729 "Rossmann-like alpha/beta/alpha sandwich fold"|IPR023382 "Adenine nucleotide alpha hydrolase-like domains"	Deafness, mitochondrial, modifier of, 580000|Liver failure, transient infantile, 613070
WBGene00007122		B0250.5	V-13C13	ENSG00000106049	HIBADH	6	Ensembl Compara 87-89|Homologene|InParanoid|OMA|OrthoInspector|OrthoMCL		IPR006115 "6-phosphogluconate dehydrogenase, NADP-binding"|IPR008927 "6-phosphogluconate dehydrogenase C-terminal domain-like"|IPR011548 "3-hydroxyisobutyrate dehydrogenase"|IPR013328 "6-phosphogluconate dehydrogenase, domain 2"|IPR015815 "3-hydroxyisobutyrate dehydrogenase-related"|IPR016040 "NAD(P)-binding domain"|IPR029154 "3-hydroxyisobutyrate dehydrogenase, NAD-binding domain"
WBGene00007128	memb-1	B0272.2	X-4P11	ENSG00000108433	GOSR2	6	Ensembl Compara 87-89|Homologene|InParanoid|OMA|OrthoInspector|OrthoMCL		IPR027027 "GOSR2/Membrin/Bos1"	Epilepsy, progressive myoclonic 6, 614018
WBGene00007137		B0285.4	III-2M03	ENSG00000205629	LCMT1	6	Ensembl Compara 87-89|Homologene|InParanoid|OMA|OrthoInspector|OrthoMCL		IPR007213 "Methyltransferase Ppm1/Ppm2/Tcmp"|IPR016651 "Leucine carboxyl methyltransferase 1, LCMT1"|IPR029063 "S-adenosyl-L-methionine-dependent methyltransferase"
WBGene00007144		B0334.4	II-7H18	ENSG00000169230	PRELID1	6	Ensembl Compara 87-89|Homologene|InParanoid|OMA|OrthoInspector|OrthoMCL		IPR006797 "PRELI/MSF1 domain"
WBGene00007145		B0334.5	II-7H20	ENSG00000156170	NDUFAF6	6	Ensembl Compara 87-89|Homologene|InParanoid|OMA|OrthoInspector|OrthoMCL		IPR002060 "Squalene/phytoene synthase"|IPR008949 "Isoprenoid synthase domain"	Leigh syndrome due to mitochondrial complex I deficiency, 256000
WBGene00007150	acly-2	B0365.1	V-8P09	ENSG00000131473	ACLY	6	Ensembl Compara 87-89|Homologene|InParanoid|OMA|OrthoInspector|OrthoMCL	SM00881	IPR002020 "Citrate synthase"|IPR003781 "CoA-binding"|IPR005811 "ATP-citrate lyase/succinyl-CoA ligase"|IPR013650 "ATP-grasp fold, succinyl-CoA synthetase-type"|IPR013816 "ATP-grasp fold, subdomain 2"|IPR014608 "ATP-citrate synthase"|IPR016040 "NAD(P)-binding domain"|IPR016102 "Succinyl-CoA synthetase-like"|IPR016142 "Citrate synthase-like, large alpha subdomain"|IPR016143 "Citrate synthase-like, …
WBGene00016995	acly-1	D1005.1	X-1O12	ENSG00000131473	ACLY	6	Ensembl Compara 87-89|Homologene|InParanoid|OMA|OrthoInspector|OrthoMCL	SM00881	IPR002020 "Citrate synthase"|IPR003781 "CoA-binding"|IPR005811 "ATP-citrate lyase/succinyl-CoA ligase"|IPR013650 "ATP-grasp fold, succinyl-CoA synthetase-type"|IPR013816 "ATP-grasp fold, subdomain 2"|IPR014608 "ATP-citrate synthase"|IPR016040 "NAD(P)-binding domain"|IPR016102 "Succinyl-CoA synthetase-like"|IPR016142 "Citrate synthase-like, large alpha subdomain"|IPR016143 "Citrate synthase-like, …
WBGene00007174	mboa-1	B0395.2	X-7E08	ENSG00000057252	SOAT1	6	Ensembl Compara 87-89|Homologene|InParanoid|OMA|OrthoInspector|OrthoMCL		IPR004299 "Membrane bound O-acyl transferase, MBOAT"|IPR014371 "Sterol O-acyltransferase, ACAT/DAG/ARE types"|IPR030687 "Sterol O-acyltransferase, metazoa"
WBGene00007175		B0395.3	X-7E10	ENSG00000095321	CRAT	6	Ensembl Compara 87-89|Homologene|InParanoid|OMA|OrthoInspector|OrthoMCL		IPR000542 "Acyltransferase ChoActase/COT/CPT"	Carnitine acetyltransferase deficiency
WBGene00007184	ctr-9	B0464.2	III-5E05|III-8O17	ENSG00000198730	CTR9	6	Ensembl Compara 87-89|Homologene|InParanoid|OMA|OrthoInspector|OrthoMCL	SM00028	IPR011990 "Tetratricopeptide-like helical domain"|IPR019734 "Tetratricopeptide repeat"|IPR031101 "RNA polymerase-associated protein Ctr9"
WBGene00007188		B0464.9	III-5E17|III-8B16	ENSG00000214517	PPME1	6	Ensembl Compara 87-89|Homologene|InParanoid|OMA|OrthoInspector|OrthoMCL		IPR000073 "Alpha/beta hydrolase fold-1"|IPR000639 "Epoxide hydrolase-like"|IPR016812 "Protein phosphatase methylesterase, eukaryotic"|IPR029058 "Alpha/Beta hydrolase fold"
WBGene00007189		B0491.1	II-7B22	ENSG00000143315	PIGM	6	Ensembl Compara 87-89|Homologene|InParanoid|OMA|OrthoInspector|OrthoMCL		IPR007704 "Mannosyltransferase, DXD"	Glycosylphosphatidylinositol deficiency, 610293
WBGene00007194		B0491.7	II-7D10	ENSG00000117543	DPH5	6	Ensembl Compara 87-89|Homologene|InParanoid|OMA|OrthoInspector|OrthoMCL		IPR000878 "Tetrapyrrole methylase"|IPR004551 "Diphthine synthase"|IPR014776 "Tetrapyrrole methylase, subdomain 2"|IPR014777 "Tetrapyrrole methylase, subdomain 1"
WBGene00007197		B0513.5	IV-7G24	ENSG00000100033	PRODH	6	Ensembl Compara 87-89|Homologene|InParanoid|OMA|OrthoInspector|OrthoMCL		IPR002872 "Proline dehydrogenase domain"|IPR011992 "EF-hand domain pair"|IPR015659 "Proline oxidase family"|IPR029041 "FAD-linked oxidoreductase-like"	Hyperprolinemia, type I, 239500|Schizophrenia, susceptibility to, 4, 600850
WBGene00007201	exos-4.1	B0564.1	IV-7A07	ENSG00000178896	EXOSC4	6	Ensembl Compara 87-89|Homologene|InParanoid|OMA|OrthoInspector|OrthoMCL		IPR001247 "Exoribonuclease, phosphorolytic domain 1"|IPR015847 "Exoribonuclease, phosphorolytic domain 2"|IPR020568 "Ribosomal protein S5 domain 2-type fold"|IPR027408 "PNPase/RNase PH domain"
WBGene00007202		B0564.2	IV-7A09	ENSG00000239382	ALKBH6	6	Ensembl Compara 87-89|Homologene|InParanoid|OMA|OrthoInspector|OrthoMCL		IPR027450 "Alpha-ketoglutarate-dependent dioxygenase AlkB-like"|IPR032862 "Alpha-ketoglutarate-dependent dioxygenase alkB homologue 6"
WBGene00007210	agmo-1	BE10.2	III-6M02	ENSG00000187546	AGMO	6	Ensembl Compara 87-89|Homologene|InParanoid|OMA|OrthoInspector|OrthoMCL		IPR006694 "Fatty acid hydroxylase"
WBGene00007216		C01A2.4	I-6F10	ENSG00000083937	CHMP2B	6	Ensembl Compara 87-89|Homologene|InParanoid|OMA|OrthoInspector|OrthoMCL		IPR005024 "Snf7 family"	Amyotrophic lateral sclerosis 17, 614696|Dementia, familial, nonspecific, 600795
WBGene00007217	tads-1	C01A2.5	I-6F12	ENSG00000022277	RTFDC1	6	Ensembl Compara 87-89|Homologene|InParanoid|OMA|OrthoInspector|OrthoMCL		IPR006735 "Replication termination factor 2"|IPR027799 "Replication termination factor 2, RING-finger"
WBGene00007234		C01G10.7	V-9J06	ENSG00000125246	CLYBL	6	Ensembl Compara 87-89|Homologene|InParanoid|OMA|OrthoInspector|OrthoMCL		IPR005000 "HpcH/HpaI aldolase/citrate lyase domain"|IPR011206 "Citrate lyase beta subunit-like"|IPR015813 "Pyruvate/Phosphoenolpyruvate kinase-like domain"
WBGene00007235		C01G10.8	V-9J08	ENSG00000100591	AHSA1	6	Ensembl Compara 87-89|Homologene|InParanoid|OMA|OrthoInspector|OrthoMCL	SM01000	IPR013538 "Activator of Hsp90 ATPase homologue 1-like"|IPR015310 "Activator of Hsp90 ATPase, N-terminal"|IPR023393 "START-like domain"
WBGene00007236		C01G10.9	V-9J10	ENSG00000037757	MRI1	6	Ensembl Compara 87-89|Homologene|InParanoid|OMA|OrthoInspector|OrthoMCL		IPR000649 "Initiation factor 2B-related"|IPR005251 "Methylthioribose-1-phosphate isomerase"|IPR011559 "Initiation factor 2B alpha/beta/delta"|IPR027363 "Methylthioribose-1-phosphate isomerase-like, N-terminal domain"
WBGene00007256	swsn-9	C01H6.7	I-3F15	ENSG00000166164	BRD7	6	Ensembl Compara 87-89|Homologene|InParanoid|OMA|OrthoInspector|OrthoMCL	SM00297	IPR001487 "Bromodomain"|IPR021900 "Protein of unknown function DUF3512"
WBGene00007267		C03A3.2	X-5M02	ENSG00000109066	TMEM104	6	Ensembl Compara 87-89|Homologene|InParanoid|OMA|OrthoInspector|OrthoMCL		IPR013057 "Amino acid transporter, transmembrane domain"
WBGene00007287	gck-4	C04A11.3	X-6M22	ENSG00000072786	STK10	6	Ensembl Compara 87-89|Homologene|InParanoid|OMA|OrthoInspector|OrthoMCL	SM00220	IPR000719 "Protein kinase domain"|IPR011009 "Protein kinase-like domain"|IPR022165 "Polo kinase kinase"
WBGene00007330		C05C10.3	II-7E19	ENSG00000083720	OXCT1	6	Ensembl Compara 87-89|Homologene|InParanoid|OMA|OrthoInspector|OrthoMCL	SM00882	IPR004165 "Coenzyme A transferase family I"|IPR012791 "3-oxoacid CoA-transferase, subunit B"|IPR012792 "3-oxoacid CoA-transferase, subunit A"|IPR014388 "3-oxoacid CoA-transferase"	Succinyl CoA:3-oxoacid CoA transferase deficiency, 245050
WBGene00015181		B0416.5	X-4N07	ENSG00000169026	MFSD7	6	Ensembl Compara 87-89|Homologene|InParanoid|OMA|OrthoInspector|OrthoMCL		IPR011701 "Major facilitator superfamily"|IPR020846 "Major facilitator superfamily domain"
WBGene00007350	sucl-1	C05G5.4	X-6H24	ENSG00000163541	SUCLG1	6	Ensembl Compara 87-89|Homologene|InParanoid|OMA|OrthoInspector|OrthoMCL	SM00881	IPR003781 "CoA-binding"|IPR005810 "Succinyl-CoA ligase, alpha subunit"|IPR005811 "ATP-citrate lyase/succinyl-CoA ligase"|IPR016040 "NAD(P)-binding domain"|IPR016102 "Succinyl-CoA synthetase-like"	Mitochondrial DNA depletion syndrome 9 (encephalomyopathic type with methylmalonic aciduria), 245400
WBGene00017759	sucl-2	F23H11.3	III-1G02	ENSG00000163541	SUCLG1	6	Ensembl Compara 87-89|Homologene|InParanoid|OMA|OrthoInspector|OrthoMCL	SM00881	IPR003781 "CoA-binding"|IPR005810 "Succinyl-CoA ligase, alpha subunit"|IPR005811 "ATP-citrate lyase/succinyl-CoA ligase"|IPR016040 "NAD(P)-binding domain"|IPR016102 "Succinyl-CoA synthetase-like"	Mitochondrial DNA depletion syndrome 9 (encephalomyopathic type with methylmalonic aciduria), 245400
WBGene00007352	cdc-48.1	C06A1.1	II-7K02	ENSG00000165280	VCP	6	Ensembl Compara 87-89|Homologene|InParanoid|OMA|OrthoInspector|OrthoMCL	SM00382|SM01072|SM01073	IPR003338 "CDC48, N-terminal subdomain"|IPR003593 "AAA+ ATPase domain"|IPR003959 "ATPase, AAA-type, core"|IPR004201 "CDC48, domain 2"|IPR005938 "AAA ATPase, CDC48 family"|IPR009010 "Aspartate decarboxylase-like domain"|IPR015415 "Vps4 oligomerisation, C-terminal"|IPR027417 "P-loop containing nucleoside triphosphate hydrolase"|IPR029067 "CDC48 domain 2-like"	Amyotrophic lateral sclerosis 14, with or without frontotemporal dementia, 613954|Charcot-Marie-Tooth disease, type 2Y, 616687|Inclusion body myopathy with early-onset Paget disease and frontotemporal dementia 1, 167320
WBGene00008053	cdc-48.2	C41C4.8	II-10C11|II-6A11	ENSG00000165280	VCP	6	Ensembl Compara 87-89|Homologene|InParanoid|OMA|OrthoInspector|OrthoMCL	SM00382|SM01072|SM01073	IPR003338 "CDC48, N-terminal subdomain"|IPR003593 "AAA+ ATPase domain"|IPR003959 "ATPase, AAA-type, core"|IPR004201 "CDC48, domain 2"|IPR005938 "AAA ATPase, CDC48 family"|IPR009010 "Aspartate decarboxylase-like domain"|IPR015415 "Vps4 oligomerisation, C-terminal"|IPR027417 "P-loop containing nucleoside triphosphate hydrolase"|IPR029067 "CDC48 domain 2-like"	Amyotrophic lateral sclerosis 14, with or without frontotemporal dementia, 613954|Charcot-Marie-Tooth disease, type 2Y, 616687|Inclusion body myopathy with early-onset Paget disease and frontotemporal dementia 1, 167320
WBGene00007388	folt-1	C06H2.4	V-15E08	ENSG00000117479	SLC19A2	6	Ensembl Compara 87-89|Homologene|InParanoid|OMA|OrthoInspector|OrthoMCL		IPR002666 "Reduced folate carrier"|IPR020846 "Major facilitator superfamily domain"	Thiamine-responsive megaloblastic anemia syndrome, 249270
WBGene00007400		C07A9.2	III-5M11	ENSG00000106245	BUD31	6	Ensembl Compara 87-89|Homologene|InParanoid|OMA|OrthoInspector|OrthoMCL		IPR001748 "G10 protein"
WBGene00007412	stip-1	C07E3.1	II-7C04	ENSG00000100109	TFIP11	6	Ensembl Compara 87-89|Homologene|InParanoid|OMA|OrthoInspector|OrthoMCL	SM00443	IPR000467 "G-patch domain"|IPR022159 "Tuftelin interacting protein, N-terminal domain"|IPR022783 "GC-rich sequence DNA-binding factor domain"|IPR024933 "Septin and tuftelin interacting protein"
WBGene00007413	pro-2	C07E3.2	II-7C06	ENSG00000188976	NOC2L	6	Ensembl Compara 87-89|Homologene|InParanoid|OMA|OrthoInspector|OrthoMCL		IPR005343 "Nucleolar complex protein 2"|IPR016024 "Armadillo-type fold"
WBGene00007428	wdr-20	C08B6.7	V-7E05	ENSG00000140153	WDR20	6	Ensembl Compara 87-89|Homologene|InParanoid|OMA|OrthoInspector|OrthoMCL	SM00320	IPR001680 "WD40 repeat"|IPR015943 "WD40/YVTN repeat-like-containing domain"|IPR017986 "WD40-repeat-containing domain"
WBGene00007429		C08B6.8	V-7E07	ENSG00000076043	REXO2	6	Ensembl Compara 87-89|Homologene|InParanoid|OMA|OrthoInspector|OrthoMCL	SM00479	IPR012337 "Ribonuclease H-like domain"|IPR013520 "Exonuclease, RNase T/DNA polymerase III"
WBGene00007434	arp-6	C08B11.6	II-5N16	ENSG00000075089	ACTR6	6	Ensembl Compara 87-89|Homologene|InParanoid|OMA|OrthoInspector|OrthoMCL	SM00268	IPR004000 "Actin family"|IPR030054 "Actin-related protein 6"
WBGene00007435		C08B11.8	II-5N20	ENSG00000088035	ALG6	6	Ensembl Compara 87-89|Homologene|InParanoid|OMA|OrthoInspector|OrthoMCL		IPR004856 "Glycosyl transferase, ALG6/ALG8"	Congenital disorder of glycosylation, type Ic, 603147
WBGene00007438		C08E8.2	V-12E13	ENSG00000101474	APMAP	6	Ensembl Compara 87-89|Homologene|InParanoid|OMA|OrthoInspector|OrthoMCL		IPR004141 "Strictosidine synthase"|IPR011042 "Six-bladed beta-propeller, TolB-like"|IPR018119 "Strictosidine synthase, conserved region"
WBGene00007444		C08F8.2	IV-5N20	ENSG00000156502	SUPV3L1	6	Ensembl Compara 87-89|Homologene|InParanoid|OMA|OrthoInspector|OrthoMCL	SM00490	IPR001650 "Helicase, C-terminal"|IPR014001 "Helicase superfamily 1/2, ATP-binding domain"|IPR022192 "Mitochondrial degradasome RNA helicase subunit, C-terminal domain"|IPR027417 "P-loop containing nucleoside triphosphate hydrolase"
WBGene00007446	mboa-4	C08F8.4	IV-5N24	ENSG00000143797	MBOAT2	6	Ensembl Compara 87-89|Homologene|InParanoid|OMA|OrthoInspector|OrthoMCL		IPR004299 "Membrane bound O-acyl transferase, MBOAT"
WBGene00016934	mboa-3	C54G7.2	X-3I01	ENSG00000143797	MBOAT2	6	Ensembl Compara 87-89|Homologene|InParanoid|OMA|OrthoInspector|OrthoMCL		IPR004299 "Membrane bound O-acyl transferase, MBOAT"
WBGene00007463	vgln-1	C08H9.2	II-7C09	ENSG00000115677	HDLBP	6	Ensembl Compara 87-89|Homologene|InParanoid|OMA|OrthoInspector|OrthoMCL	SM00322	IPR004087 "K Homology domain"|IPR004088 "K Homology domain, type 1"
WBGene00008435	glna-2	DH11.1	II-5L20	ENSG00000115419	GLS	6	Ensembl Compara 87-89|Homologene|InParanoid|OMA|OrthoInspector|OrthoMCL	SM00248	IPR012338 "Beta-lactamase/transpeptidase-like"|IPR015868 "Glutaminase"|IPR020683 "Ankyrin repeat-containing domain"
WBGene00007514	catp-8	C10C6.6	IV-6K01	ENSG00000105726	ATP13A1	6	Ensembl Compara 87-89|Homologene|InParanoid|OMA|OrthoInspector|OrthoMCL		IPR001757 "P-type ATPase"|IPR006544 "P-type ATPase, subfamily V"|IPR008250 "P-type ATPase, A domain"|IPR023214 "HAD-like domain"|IPR023299 "P-type ATPase, cytoplasmic domain N"
WBGene00007528		C11H1.2	X-6N15	ENSG00000188092	GPR89B	6	Ensembl Compara 87-89|Homologene|InParanoid|OMA|OrthoInspector|OrthoMCL		IPR015672 "The Golgi pH regulator/GPCR-type G protein"|IPR022535 "Golgi pH regulator, conserved domain"|IPR025969 "Abscisic acid G-protein coupled receptor-like domain"
WBGene00013551		Y75B8A.16		ENSG00000188092	GPR89B	6	Ensembl Compara 87-89|Homologene|InParanoid|OMA|OrthoInspector|OrthoMCL		IPR015672 "The Golgi pH regulator/GPCR-type G protein"|IPR022535 "Golgi pH regulator, conserved domain"|IPR025969 "Abscisic acid G-protein coupled receptor-like domain"
WBGene00007548		C13C4.4	V-15E13	ENSG00000107902	LHPP	6	Ensembl Compara 87-89|Homologene|InParanoid|OMA|OrthoInspector|OrthoMCL		IPR006355 "HAD-superfamily hydrolase, subfamily IIA, hypothetical 2"|IPR006357 "HAD-superfamily hydrolase, subfamily IIA"|IPR023214 "HAD-like domain"|IPR023215 "Nitrophenylphosphatase-like domain"
WBGene00007549	spin-1	C13C4.5	V-8K11	ENSG00000169682	SPNS1	6	Ensembl Compara 87-89|Homologene|InParanoid|OMA|OrthoInspector|OrthoMCL		IPR011701 "Major facilitator superfamily"|IPR020846 "Major facilitator superfamily domain"
WBGene00008033	spin-2	C39E9.10	IV-6P22	ENSG00000169682	SPNS1	6	Ensembl Compara 87-89|Homologene|InParanoid|OMA|OrthoInspector|OrthoMCL		IPR011701 "Major facilitator superfamily"|IPR020846 "Major facilitator superfamily domain"
WBGene00007554	pptr-2	C13G3.3	V-7F13	ENSG00000112640	PPP2R5D	6	Ensembl Compara 87-89|Homologene|InParanoid|OMA|OrthoInspector|OrthoMCL		IPR002554 "Protein phosphatase 2A, regulatory B subunit, B56"|IPR016024 "Armadillo-type fold"	Mental retardation, autosomal dominant 35, 616355
WBGene00007555	dohh-1	C14A4.1	II-7K14	ENSG00000129932	DOHH	6	Ensembl Compara 87-89|Homologene|InParanoid|OMA|OrthoInspector|OrthoMCL	SM00567	IPR004155 "PBS lyase HEAT-like repeat"|IPR011989 "Armadillo-like helical"|IPR016024 "Armadillo-type fold"
WBGene00007561	ccm-3	C14A4.11	II-7M10	ENSG00000114209	PDCD10	6	Ensembl Compara 87-89|Homologene|InParanoid|OMA|OrthoInspector|OrthoMCL		IPR009652 "Programmed cell death protein 10"	Cerebral cavernous malformations 3, 603285
WBGene00007564	mrps-22	C14A4.14	II-7K16	ENSG00000175110	MRPS22	6	Ensembl Compara 87-89|Homologene|InParanoid|OMA|OrthoInspector|OrthoMCL		IPR019374 "Ribosomal protein S22, mitochondrial"	Combined oxidative phosphorylation deficiency 5, 611719
WBGene00007576	dph-1	C14B1.5	III-1H24	ENSG00000108963	DPH1	6	Ensembl Compara 87-89|Homologene|InParanoid|OMA|OrthoInspector|OrthoMCL		IPR016435 "Diphthamide synthesis DPH1/DPH2"	Developmental delay with short stature, dysmorphic features, and sparse hair, 616901
WBGene00007581	alkb-8	C14B1.10	III-1J10|III-8B18	ENSG00000137760	ALKBH8	6	Ensembl Compara 87-89|Homologene|InParanoid|OMA|OrthoInspector|OrthoMCL		IPR012677 "Nucleotide-binding alpha-beta plait domain"|IPR013216 "Methyltransferase type 11"|IPR027450 "Alpha-ketoglutarate-dependent dioxygenase AlkB-like"|IPR029063 "S-adenosyl-L-methionine-dependent methyltransferase"|IPR032863 "Alkylated DNA repair protein alkB homologue 8"
WBGene00008505		F01G4.6	IV-5N16	ENSG00000075415	SLC25A3	6	Ensembl Compara 87-89|Homologene|InParanoid|OMA|OrthoInspector|OrthoMCL		IPR018108 "Mitochondrial substrate/solute carrier"|IPR023395 "Mitochondrial carrier domain"	Mitochondrial phosphate carrier deficiency, 610773
WBGene00007588		C14C10.5	V-8M06	ENSG00000068878	PSME4	6	Ensembl Compara 87-89|Homologene|InParanoid|OMA|OrthoInspector|OrthoMCL		IPR011989 "Armadillo-like helical"|IPR016024 "Armadillo-type fold"|IPR021843 "Protein of unknown function DUF3437"|IPR032430 "Proteasome activator Blm10, mid region"
WBGene00007593		C14H10.3	X-5C19	ENSG00000179889	PDXDC1	6	Ensembl Compara 87-89|Homologene|InParanoid|OMA|OrthoInspector|OrthoMCL		IPR015421 "Pyridoxal phosphate-dependent transferase, major region, subdomain 1"|IPR015424 "Pyridoxal phosphate-dependent transferase"
WBGene00007595		C15A7.2	X-5D02|X-5D04	ENSG00000167619	TMEM145	6	Ensembl Compara 87-89|Homologene|InParanoid|OMA|OrthoInspector|OrthoMCL		IPR019336 "Intimal thickness related receptor, IRP"
WBGene00007617	rrbs-1	C15H11.9	V-9B07	ENSG00000179041	RRS1	6	Ensembl Compara 87-89|Homologene|InParanoid|OMA|OrthoInspector|OrthoMCL		IPR007023 "Ribosomal biogenesis regulatory protein"
WBGene00007620	ocrl-1	C16C2.3	I-4J02|I-4J06	ENSG00000204084	INPP5B	6	Ensembl Compara 87-89|Homologene|InParanoid|OMA|OrthoInspector|OrthoMCL	SM00128|SM00324	IPR000198 "Rho GTPase-activating protein domain"|IPR000300 "Inositol polyphosphate-related phosphatase"|IPR005135 "Endonuclease/exonuclease/phosphatase"|IPR008936 "Rho GTPase activation protein"
WBGene00007622		C16C10.1	III-2E07	ENSG00000075303	SLC25A40	6	Ensembl Compara 87-89|Homologene|InParanoid|OMA|OrthoInspector|OrthoMCL		IPR018108 "Mitochondrial substrate/solute carrier"|IPR023395 "Mitochondrial carrier domain"
WBGene00007623		C16C10.2	III-2E09	ENSG00000183520	UTP11	6	Ensembl Compara 87-89|Homologene|InParanoid|OMA|OrthoInspector|OrthoMCL		IPR007144 "Small-subunit processome, Utp11"
WBGene00007625		C16C10.4	III-2E13	ENSG00000150459	SAP18	6	Ensembl Compara 87-89|Homologene|InParanoid|OMA|OrthoInspector|OrthoMCL		IPR010516 "Sin3 associated polypeptide p18"
WBGene00007626	rnf-121	C16C10.5	III-2E15	ENSG00000137522	RNF121	6	Ensembl Compara 87-89|Homologene|InParanoid|OMA|OrthoInspector|OrthoMCL	SM00184	IPR001841 "Zinc finger, RING-type"|IPR013083 "Zinc finger, RING/FYVE/PHD-type"
WBGene00007686	tomm-40	C18E9.6	II-6B11	ENSG00000130204	TOMM40	6	Ensembl Compara 87-89|Homologene|InParanoid|OMA|OrthoInspector|OrthoMCL		IPR023614 "Porin domain"|IPR027246 "Eukaryotic porin/Tom40"
WBGene00007696	tram-1	C24F3.1	IV-5K16	ENSG00000067167	TRAM1	6	Ensembl Compara 87-89|Homologene|InParanoid|OMA|OrthoInspector|OrthoMCL	SM00724	IPR006634 "TRAM/LAG1/CLN8 homology domain"|IPR013599 "TRAM1-like protein"|IPR016447 "Translocation associated membrane protein"
WBGene00007703	gbf-1	C24H11.7	III-6G15	ENSG00000107862	GBF1	6	Ensembl Compara 87-89|Homologene|InParanoid|OMA|OrthoInspector|OrthoMCL	SM00222	IPR000904 "Sec7 domain"|IPR016024 "Armadillo-type fold"|IPR023394 "Sec7 domain, alpha orthogonal bundle"|IPR032691 "Guanine nucleotide exchange factor, N-terminal"
WBGene00007707		C25A1.5	I-5G21	ENSG00000103089	FA2H	6	Ensembl Compara 87-89|Homologene|InParanoid|OMA|OrthoInspector|OrthoMCL	SM01117	IPR001199 "Cytochrome b5-like heme/steroid binding domain"|IPR006694 "Fatty acid hydroxylase"	Spastic paraplegia 35, autosomal recessive, 612319
WBGene00016506	abhd-5.1	C37H5.2	V-3J10	ENSG00000100439	ABHD4	6	Ensembl Compara 87-89|Homologene|InParanoid|OMA|OrthoInspector|OrthoMCL		IPR000073 "Alpha/beta hydrolase fold-1"|IPR029058 "Alpha/Beta hydrolase fold"
WBGene00016507	abhd-5.2	C37H5.3	V-3J12	ENSG00000100439	ABHD4	6	Ensembl Compara 87-89|Homologene|InParanoid|OMA|OrthoInspector|OrthoMCL		IPR000073 "Alpha/beta hydrolase fold-1"|IPR029058 "Alpha/Beta hydrolase fold"
WBGene00007712	mrpl-34	C25A1.13	I-9N13	ENSG00000055950	MRPL43	6	Ensembl Compara 87-89|Homologene|InParanoid|OMA|OrthoInspector|OrthoMCL	SM00916	IPR007741 "Ribosomal protein/NADH dehydrogenase domain"|IPR012336 "Thioredoxin-like fold"
WBGene00007744		C26D10.3	II-6I03	ENSG00000121350	PYROXD1	6	Ensembl Compara 87-89|Homologene|InParanoid|OMA|OrthoInspector|OrthoMCL		IPR023753 "FAD/NAD(P)-binding domain"	Myopathy, myofibrillar, 8, 617258
WBGene00007752	wdfy-3	C26H9A.2	IV-6B06|IV-6B10|IV-9C11	ENSG00000163625	WDFY3	6	Ensembl Compara 87-89|Homologene|InParanoid|OMA|OrthoInspector|OrthoMCL	SM00064|SM00320|SM01026	IPR000306 "FYVE zinc finger"|IPR000409 "BEACH domain"|IPR001680 "WD40 repeat"|IPR011011 "Zinc finger, FYVE/PHD-type"|IPR011993 "PH domain-like"|IPR013083 "Zinc finger, RING/FYVE/PHD-type"|IPR015943 "WD40/YVTN repeat-like-containing domain"|IPR017986 "WD40-repeat-containing domain"|IPR023362 "PH-BEACH domain"	Microcephaly 18, primary, autosomal dominant, 617520
WBGene00007784	ruvb-1	C27H6.2	V-6P06	ENSG00000175792	RUVBL1	6	Ensembl Compara 87-89|Homologene|InParanoid|OMA|OrthoInspector|OrthoMCL	SM00382	IPR003593 "AAA+ ATPase domain"|IPR010339 "TIP49, C-terminal"|IPR027238 "RuvB-like"|IPR027417 "P-loop containing nucleoside triphosphate hydrolase"
WBGene00007787		C27H6.8	V-6P24	ENSG00000139637	C12orf10	6	Ensembl Compara 87-89|Homologene|InParanoid|OMA|OrthoInspector|OrthoMCL		IPR003226 "Metal-dependent protein hydrolase"
WBGene00007799	nrx-1	C29A12.4	V-14H03|V-7O16	ENSG00000179915	NRXN1	6	Ensembl Compara 87-89|Homologene|InParanoid|OMA|OrthoInspector|OrthoMCL	SM00181|SM00282|SM00294	IPR000742 "EGF-like domain"|IPR001791 "Laminin G domain"|IPR013320 "Concanavalin A-like lectin/glucanase domain"	Pitt-Hopkins-like syndrome 2, 614325|Schizophrenia, susceptibility to, 17, 614332
WBGene00009531		F38B2.4	X-5M12	ENSG00000106992	AK1	6	Ensembl Compara 87-89|Homologene|InParanoid|OMA|OrthoInspector|OrthoMCL		IPR000850 "Adenylate kinase/UMP-CMP kinase"|IPR006267 "Adenylate kinase, isozyme 1/5"|IPR027417 "P-loop containing nucleoside triphosphate hydrolase"	Hemolytic anemia due to adenylate kinase deficiency, 612631
WBGene00007812		C29F7.3	X-6E16	ENSG00000162368	CMPK1	6	Ensembl Compara 87-89|Homologene|InParanoid|OMA|OrthoInspector|OrthoMCL		IPR000850 "Adenylate kinase/UMP-CMP kinase"|IPR006266 "UMP-CMP kinase"|IPR027417 "P-loop containing nucleoside triphosphate hydrolase"
WBGene00009575		F40F8.1	II-7L21	ENSG00000162368	CMPK1	6	Ensembl Compara 87-89|Homologene|InParanoid|OMA|OrthoInspector|OrthoMCL		IPR000850 "Adenylate kinase/UMP-CMP kinase"|IPR006266 "UMP-CMP kinase"|IPR027417 "P-loop containing nucleoside triphosphate hydrolase"
WBGene00017046	utx-1	D2021.1	X-4I10	ENSG00000147050	KDM6A	6	Ensembl Compara 87-89|Homologene|InParanoid|OMA|OrthoInspector|OrthoMCL	SM00028|SM00558	IPR003347 "JmjC domain"|IPR011990 "Tetratricopeptide-like helical domain"|IPR019734 "Tetratricopeptide repeat"	Kabuki syndrome 2, 300867
WBGene00007860	rilp-1	C32A3.3	III-1F24	ENSG00000188026	RILPL1	6	Ensembl Compara 87-89|Homologene|InParanoid|OMA|OrthoInspector|OrthoMCL		IPR019143 "JNK/Rab-associated protein-1, N-terminal"|IPR021563 "Rab interacting lysosomal protein"
WBGene00007878		C33A11.2	X-7G13	ENSG00000156171	DRAM2	6	Ensembl Compara 87-89|Homologene|InParanoid|OMA|OrthoInspector|OrthoMCL		IPR019402 "Frag1/DRAM/Sfk1"	Cone-rod dystrophy 21, 616502
WBGene00007882		C33A12.3	IV-4L16	ENSG00000151470	C4orf33	6	Ensembl Compara 87-89|Homologene|InParanoid|OMA|OrthoInspector|OrthoMCL		IPR010502 "Carbohydrate-binding domain, family 9"
WBGene00007886	ethe-1	C33A12.7	IV-4L24	ENSG00000105755	ETHE1	6	Ensembl Compara 87-89|Homologene|InParanoid|OMA|OrthoInspector|OrthoMCL	SM00849	IPR001279 "Metallo-beta-lactamase"	Ethylmalonic encephalopathy, 602473
WBGene00008430	hgap-2	D2085.5	II-6E24	ENSG00000170471	RALGAPB	6	Ensembl Compara 87-89|Homologene|InParanoid|OMA|OrthoInspector|OrthoMCL		IPR000331 "Rap GTPase activating protein domain"
WBGene00007924	rsu-1	C34C12.5	III-8B21	ENSG00000148484	RSU1	6	Ensembl Compara 87-89|Homologene|InParanoid|OMA|OrthoInspector|OrthoMCL	SM00364|SM00369	IPR001611 "Leucine-rich repeat"|IPR003591 "Leucine-rich repeat, typical subtype"|IPR032675 "Leucine-rich repeat domain, L domain-like"
WBGene00007941		C34F6.7	X-8F16	ENSG00000168936	TMEM129	6	Ensembl Compara 87-89|Homologene|InParanoid|OMA|OrthoInspector|OrthoMCL		IPR018801 "Putative transmembrane protein precursor"
WBGene00007942	idh-2	C34F6.8	X-5K18	ENSG00000182054	IDH2	6	Ensembl Compara 87-89|Homologene|InParanoid|OMA|OrthoInspector|OrthoMCL	SM01329	IPR004790 "Isocitrate dehydrogenase NADP-dependent"|IPR024084 "Isopropylmalate dehydrogenase-like domain"	D-2-hydroxyglutaric aciduria 2, 613657
WBGene00007952		C35A5.8		ENSG00000130227	XPO7	6	Ensembl Compara 87-89|Homologene|InParanoid|OMA|OrthoInspector|OrthoMCL	SM00913	IPR016024 "Armadillo-type fold"
WBGene00007953	hda-11	C35A5.9	V-7C24	ENSG00000163517	HDAC11	6	Ensembl Compara 87-89|Homologene|InParanoid|OMA|OrthoInspector|OrthoMCL		IPR000286 "Histone deacetylase superfamily"|IPR023801 "Histone deacetylase domain"
WBGene00020082	gcp-2.1	R57.1	X-1A03	ENSG00000077616	NAALAD2	6	Ensembl Compara 87-89|Homologene|InParanoid|OMA|OrthoInspector|OrthoMCL		IPR003137 "PA domain"|IPR007365 "Transferrin receptor-like, dimerisation domain"|IPR007484 "Peptidase M28"|IPR031054 "Glutamate carboxypeptidase 2 homologue"
WBGene00007956	trpp-9	C35C5.6	X-5D17	ENSG00000167632	TRAPPC9	6	Ensembl Compara 87-89|Homologene|InParanoid|OMA|OrthoInspector|OrthoMCL		IPR013935 "TRAPP II complex, Trs120"	Mental retardation, autosomal recessive 13, 613192
WBGene00007959		C35C5.10	X-8I17	ENSG00000157600	TMEM164	6	Ensembl Compara 87-89|Homologene|InParanoid|OMA|OrthoInspector|OrthoMCL		IPR026508 "Transmembrane protein 164"
WBGene00007971	rpb-3	C36B1.3	I-4G02	ENSG00000102978	POLR2C	6	Ensembl Compara 87-89|Homologene|InParanoid|OMA|OrthoInspector|OrthoMCL	SM00662	IPR009025 "DNA-directed RNA polymerase, RBP11-like dimerisation domain"|IPR011262 "DNA-directed RNA polymerase, insert domain"|IPR011263 "DNA-directed RNA polymerase, RpoA/D/Rpb3-type"
WBGene00007972	prp-4	C36B1.5	I-4G06	ENSG00000136875	PRPF4	6	Ensembl Compara 87-89|Homologene|InParanoid|OMA|OrthoInspector|OrthoMCL	SM00320|SM00500	IPR001680 "WD40 repeat"|IPR014906 "Pre-mRNA processing factor 4 (PRP4)-like"|IPR015943 "WD40/YVTN repeat-like-containing domain"|IPR017986 "WD40-repeat-containing domain"|IPR020472 "G-protein beta WD-40 repeat"|IPR027106 "U4/U6 small nuclear ribonucleoprotein Prp4"	Retinitis pigmentosa 70, 615922
WBGene00007974	dhfr-1	C36B1.7	I-4G10	ENSG00000228716	DHFR	6	Ensembl Compara 87-89|Homologene|InParanoid|OMA|OrthoInspector|OrthoMCL		IPR001796 "Dihydrofolate reductase domain"|IPR012259 "Dihydrofolate reductase"|IPR024072 "Dihydrofolate reductase-like domain"	Megaloblastic anemia due to dihydrofolate reductase deficiency, 613839
WBGene00007982	pxd-1	C36E8.3	III-2A11	ENSG00000120594	PLXDC2	6	Ensembl Compara 87-89|Homologene|InParanoid|OMA|OrthoInspector|OrthoMCL	SM00423	IPR031152 "Plexin domain-containing protein"
WBGene00007993	idhb-1	C37E2.1	X-6J21|X-8B07	ENSG00000101365	IDH3B	6	Ensembl Compara 87-89|Homologene|InParanoid|OMA|OrthoInspector|OrthoMCL	SM01329	IPR001804 "Isocitrate and isopropylmalate dehydrogenases family"|IPR004434 "Isocitrate dehydrogenase NAD-dependent"|IPR024084 "Isopropylmalate dehydrogenase-like domain"	Retinitis pigmentosa 46, 612572
WBGene00008008		C38D4.9	III-2O10	ENSG00000138382	METTL5	6	Ensembl Compara 87-89|Homologene|InParanoid|OMA|OrthoInspector|OrthoMCL		IPR007848 "Methyltransferase small domain"|IPR029063 "S-adenosyl-L-methionine-dependent methyltransferase"
WBGene00008018	tbc-8	C38H2.1	III-5F19	ENSG00000167037	SGSM1	6	Ensembl Compara 87-89|Homologene|InParanoid|OMA|OrthoInspector|OrthoMCL	SM00164|SM00593	IPR000195 "Rab-GTPase-TBC domain"|IPR004012 "RUN domain"
WBGene00008019		C38H2.2	III-5F21	ENSG00000106392	C1GALT1	6	Ensembl Compara 87-89|Homologene|InParanoid|OMA|OrthoInspector|OrthoMCL		IPR003378 "Fringe-like"
WBGene00008041	ufc-1	C40H1.6		ENSG00000143222	UFC1	6	Ensembl Compara 87-89|Homologene|InParanoid|OMA|OrthoInspector|OrthoMCL		IPR014806 "Ubiquitin-fold modifier-conjugating enzyme 1"|IPR016135 "Ubiquitin-conjugating enzyme/RWD-like"
WBGene00008078	vps-50	C44B9.1	III-5D20	ENSG00000004766	VPS50	6	Ensembl Compara 87-89|Homologene|InParanoid|OMA|OrthoInspector|OrthoMCL		IPR019514 "Protein of unknown function DUF2451, C-terminal"|IPR019515 "Vacuolar protein sorting-associated protein 54, N-terminal"
WBGene00008117	gsr-1	C46F11.2	III-1H04	ENSG00000104687	GSR	6	Ensembl Compara 87-89|Homologene|InParanoid|OMA|OrthoInspector|OrthoMCL		IPR004099 "Pyridine nucleotide-disulphide oxidoreductase, dimerisation domain"|IPR006322 "Glutathione reductase, eukaryote/bacterial"|IPR016156 "FAD/NAD-linked reductase, dimerisation domain"|IPR023753 "FAD/NAD(P)-binding domain"	Hemolytic anemia due to glutathione reductase deficiency
WBGene00008121		C46F11.6		ENSG00000122042	UBL3	6	Ensembl Compara 87-89|Homologene|InParanoid|OMA|OrthoInspector|OrthoMCL		IPR017000 "Membrane-anchored ubiquitin-fold protein"|IPR029071 "Ubiquitin-related domain"
WBGene00008131		C47B2.2	I-6H15	ENSG00000094841	UPRT	6	Ensembl Compara 87-89|Homologene|InParanoid|OMA|OrthoInspector|OrthoMCL		IPR029057 "Phosphoribosyltransferase-like"
WBGene00008132	gale-1	C47B2.6	I-6H23	ENSG00000117308	GALE	6	Ensembl Compara 87-89|Homologene|InParanoid|OMA|OrthoInspector|OrthoMCL		IPR005886 "UDP-glucose 4-epimerase GalE"|IPR008089 "Nucleotide sugar epimerase"|IPR016040 "NAD(P)-binding domain"	Galactose epimerase deficiency, 230350
WBGene00008133	efsc-1	C47B2.7	I-6J01	ENSG00000132394	EEFSEC	6	Ensembl Compara 87-89|Homologene|InParanoid|OMA|OrthoInspector|OrthoMCL		IPR000795 "Transcription factor, GTP-binding domain"|IPR005225 "Small GTP-binding protein domain"|IPR007034 "Ribosome biogenesis protein BMS1/TSR1, C-terminal"|IPR009000 "Translation protein, beta-barrel domain"|IPR027417 "P-loop containing nucleoside triphosphate hydrolase"
WBGene00008136		C47D12.2	II-7N22	ENSG00000141627	DYM	6	Ensembl Compara 87-89|Homologene|InParanoid|OMA|OrthoInspector|OrthoMCL		IPR019142 "Dymeclin"	Dyggve-Melchior-Clausen disease, 223800|Smith-McCort dysplasia, 607326
WBGene00008148		C47E12.3	IV-5M19	ENSG00000134109	EDEM1	6	Ensembl Compara 87-89|Homologene|InParanoid|OMA|OrthoInspector|OrthoMCL		IPR001382 "Glycoside hydrolase family 47"
WBGene00008151		C47E12.7	IV-5O03	ENSG00000160214	RRP1	6	Ensembl Compara 87-89|Homologene|InParanoid|OMA|OrthoInspector|OrthoMCL		IPR010301 "Nucleolar, Nop52"
WBGene00008165		C47G2.4	II-7B06	ENSG00000164187	LMBRD2	6	Ensembl Compara 87-89|Homologene|InParanoid|OMA|OrthoInspector|OrthoMCL		IPR006876 "LMBR1-like membrane protein"
WBGene00008565	acox-2	F08A8.2	I-6H03	ENSG00000161533	ACOX1	6	Ensembl Compara 87-89|Homologene|InParanoid|OMA|OrthoInspector|OrthoMCL		IPR002655 "Acyl-CoA oxidase, C-terminal"|IPR006091 "Acyl-CoA oxidase/dehydrogenase, central domain"|IPR009075 "Acyl-CoA dehydrogenase/oxidase C-terminal"|IPR009100 "Acyl-CoA dehydrogenase/oxidase, N-terminal and middle domain"|IPR012258 "Acyl-CoA oxidase"|IPR013786 "Acyl-CoA dehydrogenase/oxidase, N-terminal"|IPR029320 "Acyl-coenzyme A oxidase, N-terminal"	Peroxisomal acyl-CoA oxidase deficiency, 264470
WBGene00008566	acox-3	F08A8.3	I-6H05	ENSG00000161533	ACOX1	6	Ensembl Compara 87-89|Homologene|InParanoid|OMA|OrthoInspector|OrthoMCL		IPR002655 "Acyl-CoA oxidase, C-terminal"|IPR006091 "Acyl-CoA oxidase/dehydrogenase, central domain"|IPR009075 "Acyl-CoA dehydrogenase/oxidase C-terminal"|IPR009100 "Acyl-CoA dehydrogenase/oxidase, N-terminal and middle domain"|IPR012258 "Acyl-CoA oxidase"|IPR013786 "Acyl-CoA dehydrogenase/oxidase, N-terminal"|IPR029320 "Acyl-coenzyme A oxidase, N-terminal"	Peroxisomal acyl-CoA oxidase deficiency, 264470
WBGene00008567		F08A8.4	I-6H07	ENSG00000161533	ACOX1	6	Ensembl Compara 87-89|Homologene|InParanoid|OMA|OrthoInspector|OrthoMCL		IPR002655 "Acyl-CoA oxidase, C-terminal"|IPR009075 "Acyl-CoA dehydrogenase/oxidase C-terminal"|IPR009100 "Acyl-CoA dehydrogenase/oxidase, N-terminal and middle domain"|IPR012258 "Acyl-CoA oxidase"|IPR013786 "Acyl-CoA dehydrogenase/oxidase, N-terminal"|IPR029320 "Acyl-coenzyme A oxidase, N-terminal"	Peroxisomal acyl-CoA oxidase deficiency, 264470
WBGene00008220		C50B6.7	V-8F08	ENSG00000240038	AMY2B	6	Ensembl Compara 87-89|Homologene|InParanoid|OMA|OrthoInspector|OrthoMCL	SM00632|SM00642	IPR006046 "Alpha amylase"|IPR006047 "Glycosyl hydrolase, family 13, catalytic domain"|IPR013780 "Glycosyl hydrolase, all-beta"|IPR013781 "Glycoside hydrolase, catalytic domain"|IPR015902 "Glycoside hydrolase, family 13"|IPR017853 "Glycoside hydrolase superfamily"|IPR031319 "Alpha-amylase, C-terminal domain"
WBGene00022199	pfk-1.1	Y71H10A.1	X-2C11	ENSG00000152556	PFKM	6	Ensembl Compara 87-89|Homologene|InParanoid|OMA|OrthoInspector|OrthoMCL		IPR000023 "Phosphofructokinase domain"|IPR009161 "ATP-dependent 6-phosphofructokinase, eukaryotic-type"|IPR022953 "ATP-dependent 6-phosphofructokinase"	Glycogen storage disease VII, 232800
WBGene00008237	nstp-10	C50F4.14		ENSG00000181830	SLC35C1	6	Ensembl Compara 87-89|Homologene|InParanoid|OMA|OrthoInspector|OrthoMCL		IPR004853 "Sugar phosphate transporter domain"	Congenital disorder of glycosylation, type IIc, 266265
WBGene00008239	fshr-1	C50H2.1	V-6L18	ENSG00000138039	LHCGR	6	Ensembl Compara 87-89|Homologene|InParanoid|OMA|OrthoInspector|OrthoMCL		IPR000276 "G protein-coupled receptor, rhodopsin-like"|IPR001611 "Leucine-rich repeat"|IPR002131 "Glycoprotein hormone receptor family"|IPR032675 "Leucine-rich repeat domain, L domain-like"	Leydig cell adenoma, somatic, with precocious puberty, 176410|Leydig cell hypoplasia with hypergonadotropic hypogonadism, 238320|Leydig cell hypoplasia with pseudohermaphroditism, 238320|Luteinizing hormone resistance, female, 238320|Precocious puberty, male, 176410
WBGene00008411	mans-1	D2030.1	I-3B14	ENSG00000111885	MAN1A1	6	Ensembl Compara 87-89|Homologene|InParanoid|OMA|OrthoInspector|OrthoMCL		IPR001382 "Glycoside hydrolase family 47"
WBGene00008258	mans-2	C52E4.5	V-8E13	ENSG00000198162	MAN1A2	6	Ensembl Compara 87-89|Homologene|InParanoid|OMA|OrthoInspector|OrthoMCL		IPR001382 "Glycoside hydrolase family 47"
WBGene00008273		C53B4.3	IV-4H09	ENSG00000110628	SLC22A18	6	Ensembl Compara 87-89|Homologene|InParanoid|OMA|OrthoInspector|OrthoMCL		IPR001958 "Tetracycline resistance protein TetA/multidrug resistance protein MdtG"|IPR011701 "Major facilitator superfamily"|IPR020846 "Major facilitator superfamily domain"	Breast cancer, somatic, 114480|Lung cancer, somatic, 211980|Rhabdomyosarcoma, somatic, 268210
WBGene00017480	nstp-2	F15B10.1	IV-3C12	ENSG00000205060	SLC35B4	6	Ensembl Compara 87-89|Homologene|InParanoid|OMA|OrthoInspector|OrthoMCL		IPR013657 "UAA transporter"
WBGene00008288		C54C6.6		ENSG00000070761	CFAP20	6	Ensembl Compara 87-89|Homologene|InParanoid|OMA|OrthoInspector|OrthoMCL		IPR007714 "Cilia/flagella-associated protein 20/WDR90/C3orf67"
WBGene00008311	rskn-2	C54G4.1	I-3N24	ENSG00000100784	RPS6KA5	6	Ensembl Compara 87-89|Homologene|InParanoid|OMA|OrthoInspector|OrthoMCL	SM00133|SM00220	IPR000719 "Protein kinase domain"|IPR000961 "AGC-kinase, C-terminal"|IPR011009 "Protein kinase-like domain"|IPR016239 "Ribosomal protein S6 kinase II"|IPR017892 "Protein kinase, C-terminal"
WBGene00008317		C54G4.7	I-3P12	ENSG00000164074	ABHD18	6	Ensembl Compara 87-89|Homologene|InParanoid|OMA|OrthoInspector|OrthoMCL		IPR019149 "Abhydrolase domain containing 18"|IPR029058 "Alpha/Beta hydrolase fold"
WBGene00008320	slc-25A29	C54G10.4	V-9J13	ENSG00000197119	SLC25A29	6	Ensembl Compara 87-89|Homologene|InParanoid|OMA|OrthoInspector|OrthoMCL		IPR018108 "Mitochondrial substrate/solute carrier"|IPR023395 "Mitochondrial carrier domain"
WBGene00008338	pafo-1	C55A6.9	V-7H20	ENSG00000006712	PAF1	6	Ensembl Compara 87-89|Homologene|InParanoid|OMA|OrthoInspector|OrthoMCL		IPR007133 "RNA polymerase II associated factor Paf1"
WBGene00008345		C56A3.6	V-8N18	ENSG00000155970	MICU3	6	Ensembl Compara 87-89|Homologene|InParanoid|OMA|OrthoInspector|OrthoMCL	SM00054	IPR002048 "EF-hand domain"|IPR011992 "EF-hand domain pair"
WBGene00008354	gcsh-1	D1025.2	X-6B24	ENSG00000140905	GCSH	6	Ensembl Compara 87-89|Homologene|InParanoid|OMA|OrthoInspector|OrthoMCL		IPR002930 "Glycine cleavage system H-protein"|IPR011053 "Single hybrid motif"|IPR017453 "Glycine cleavage system H-protein, subgroup"	Glycine encephalopathy, 605899
WBGene00009918		F52A8.5	I-3L09	ENSG00000140905	GCSH	6	Ensembl Compara 87-89|Homologene|InParanoid|OMA|OrthoInspector|OrthoMCL		IPR002930 "Glycine cleavage system H-protein"|IPR011053 "Single hybrid motif"|IPR017453 "Glycine cleavage system H-protein, subgroup"	Glycine encephalopathy, 605899
WBGene00008364	slc-25A26	D1046.3	IV-4F23	ENSG00000144741	SLC25A26	6	Ensembl Compara 87-89|Homologene|InParanoid|OMA|OrthoInspector|OrthoMCL		IPR018108 "Mitochondrial substrate/solute carrier"|IPR023395 "Mitochondrial carrier domain"	Combined oxidative phosphorylation deficiency 28, 616794
WBGene00008370		D1054.1	V-7M04	ENSG00000006757	PNPLA4	6	Ensembl Compara 87-89|Homologene|InParanoid|OMA|OrthoInspector|OrthoMCL		IPR002641 "Patatin/Phospholipase A2-related"|IPR016035 "Acyl transferase/acyl hydrolase/lysophospholipase"|IPR033562 "Patatin-like phospholipase domain-containing protein"
WBGene00015241		B0524.2	III-1M20|III-9A16	ENSG00000006757	PNPLA4	6	Ensembl Compara 87-89|Homologene|InParanoid|OMA|OrthoInspector|OrthoMCL		IPR002641 "Patatin/Phospholipase A2-related"|IPR016035 "Acyl transferase/acyl hydrolase/lysophospholipase"|IPR033562 "Patatin-like phospholipase domain-containing protein"
WBGene00008379	secs-1	D1054.13	V-7O02	ENSG00000109618	SEPSECS	6	Ensembl Compara 87-89|Homologene|InParanoid|OMA|OrthoInspector|OrthoMCL		IPR008829 "SepSecS/SepCysS family"|IPR015421 "Pyridoxal phosphate-dependent transferase, major region, subdomain 1"|IPR015424 "Pyridoxal phosphate-dependent transferase"|IPR019872 "O-phosphoseryl-tRNA(Sec) selenium transferase"	Pontocerebellar hypoplasia type 2D, 613811
WBGene00008386	cdc-5L	D1081.8	I-4M13	ENSG00000096401	CDC5L	6	Ensembl Compara 87-89|Homologene|InParanoid|OMA|OrthoInspector|OrthoMCL	SM00717	IPR001005 "SANT/Myb domain"|IPR009057 "Homeodomain-like"|IPR021786 "Pre-mRNA splicing factor component Cdc5p/Cef1"
WBGene00008398		D2005.3	I-3H20	ENSG00000105185	PDCD5	6	Ensembl Compara 87-89|Homologene|InParanoid|OMA|OrthoInspector|OrthoMCL		IPR002836 "PDCD5-related protein"
WBGene00008402	wdfy-2	D2013.2	II-6L17	ENSG00000139668	WDFY2	6	Ensembl Compara 87-89|Homologene|InParanoid|OMA|OrthoInspector|OrthoMCL	SM00064|SM00320	IPR000306 "FYVE zinc finger"|IPR001680 "WD40 repeat"|IPR011011 "Zinc finger, FYVE/PHD-type"|IPR013083 "Zinc finger, RING/FYVE/PHD-type"|IPR015943 "WD40/YVTN repeat-like-containing domain"|IPR017986 "WD40-repeat-containing domain"
WBGene00008405	ttll-12	D2013.9	II-6N07	ENSG00000100304	TTLL12	6	Ensembl Compara 87-89|Homologene|InParanoid|OMA|OrthoInspector|OrthoMCL		IPR004344 "Tubulin-tyrosine ligase/Tubulin polyglutamylase"|IPR027749 "Tubulin--tyrosine ligase-like protein 12"
WBGene00008408		D2023.4	V-15E20	ENSG00000141504	SAT2	6	Ensembl Compara 87-89|Homologene|InParanoid|OMA|OrthoInspector|OrthoMCL		IPR000182 "GNAT domain"|IPR016181 "Acyl-CoA N-acyltransferase"
WBGene00008410		D2023.6	V-8A05	ENSG00000063761	ADCK1	6	Ensembl Compara 87-89|Homologene|InParanoid|OMA|OrthoInspector|OrthoMCL		IPR004147 "UbiB domain"|IPR011009 "Protein kinase-like domain"
WBGene00008412		D2030.2	I-3B16	ENSG00000166855	CLPX	6	Ensembl Compara 87-89|Homologene|InParanoid|OMA|OrthoInspector|OrthoMCL	SM00382|SM01086	IPR003593 "AAA+ ATPase domain"|IPR003959 "ATPase, AAA-type, core"|IPR019489 "Clp ATPase, C-terminal"|IPR027417 "P-loop containing nucleoside triphosphate hydrolase"
WBGene00008415	mce-1	D2030.5	I-3B22	ENSG00000124370	MCEE	6	Ensembl Compara 87-89|Homologene|InParanoid|OMA|OrthoInspector|OrthoMCL		IPR017515 "Methylmalonyl-CoA epimerase"|IPR029068 "Glyoxalase/Bleomycin resistance protein/Dihydroxybiphenyl dioxygenase"	Methylmalonyl-CoA epimerase deficiency, 251120
WBGene00008419	wdr-23	D2030.9	I-3D06	ENSG00000100897	DCAF11	6	Ensembl Compara 87-89|Homologene|InParanoid|OMA|OrthoInspector|OrthoMCL	SM00320	IPR001680 "WD40 repeat"|IPR015943 "WD40/YVTN repeat-like-containing domain"|IPR017399 "WD repeat protein DCAF11/LEC14B"|IPR017986 "WD40-repeat-containing domain"|IPR020472 "G-protein beta WD-40 repeat"
WBGene00008431	piga-1	D2085.6	II-6G02	ENSG00000165195	PIGA	6	Ensembl Compara 87-89|Homologene|InParanoid|OMA|OrthoInspector|OrthoMCL		IPR013234 "PIGA, GPI anchor biosynthesis"	Multiple congenital anomalies-hypotonia-seizures syndrome 2, 300868|Paroxysmal nocturnal hemoglobinuria, somatic, 300818
WBGene00008439	mfb-1	DY3.6	I-9G22	ENSG00000147364	FBXO25	6	Ensembl Compara 87-89|Homologene|InParanoid|OMA|OrthoInspector|OrthoMCL		IPR001810 "F-box domain"
WBGene00008452	mrps-5	E02A10.1	V-8K16	ENSG00000144029	MRPS5	6	Ensembl Compara 87-89|Homologene|InParanoid|OMA|OrthoInspector|OrthoMCL		IPR000851 "Ribosomal protein S5"|IPR005324 "Ribosomal protein S5, C-terminal"|IPR013810 "Ribosomal protein S5, N-terminal"|IPR014720 "Double-stranded RNA-binding domain"|IPR014721 "Ribosomal protein S5 domain 2-type fold, subgroup"|IPR020568 "Ribosomal protein S5 domain 2-type fold"
WBGene00008455		E02H1.1	II-6H24	ENSG00000086189	DIMT1	6	Ensembl Compara 87-89|Homologene|InParanoid|OMA|OrthoInspector|OrthoMCL	SM00650	IPR001737 "Ribosomal RNA adenine methyltransferase KsgA/Erm"|IPR011530 "Ribosomal RNA adenine dimethylase"|IPR020598 "Ribosomal RNA adenine methylase transferase, N-terminal"|IPR029063 "S-adenosyl-L-methionine-dependent methyltransferase"
WBGene00008456		E02H1.2	II-6J02	ENSG00000132591	ERAL1	6	Ensembl Compara 87-89|Homologene|InParanoid|OMA|OrthoInspector|OrthoMCL		IPR005225 "Small GTP-binding protein domain"|IPR006073 "GTP binding domain"|IPR009019 "K homology domain, prokaryotic type"|IPR015946 "K homology domain-like, alpha/beta"|IPR027417 "P-loop containing nucleoside triphosphate hydrolase"	Perrault syndrome 6, 617565
WBGene00008480		E04D5.1	II-7E08	ENSG00000144895	EIF2A	6	Ensembl Compara 87-89|Homologene|InParanoid|OMA|OrthoInspector|OrthoMCL		IPR011387 "Translation initiation factor 2A"|IPR013979 "Translation initiation factor, beta propellor-like domain"|IPR015943 "WD40/YVTN repeat-like-containing domain"
WBGene00008506	tkt-1	F01G10.1	IV-5M02	ENSG00000151005	TKTL2	6	Ensembl Compara 87-89|Homologene|InParanoid|OMA|OrthoInspector|OrthoMCL	SM00861	IPR005474 "Transketolase, N-terminal"|IPR005475 "Transketolase-like, pyrimidine-binding domain"|IPR009014 "Transketolase C-terminal/Pyruvate-ferredoxin oxidoreductase domain II"|IPR029061 "Thiamin diphosphate-binding fold"|IPR033247 "Transketolase family"|IPR033248 "Transketolase, C-terminal domain"
WBGene00008514		F02A9.4	III-4J22|III-4J24	ENSG00000131844	MCCC2	6	Ensembl Compara 87-89|Homologene|InParanoid|OMA|OrthoInspector|OrthoMCL		IPR000022 "Carboxyl transferase"|IPR000999 "Ribonuclease III domain"|IPR029045 "ClpP/crotonase-like domain"	3-Methylcrotonyl-CoA carboxylase 2 deficiency, 210210
WBGene00008531		F02E9.7	I-4K09	ENSG00000102575	ACP5	6	Ensembl Compara 87-89|Homologene|InParanoid|OMA|OrthoInspector|OrthoMCL		IPR004843 "Calcineurin-like phosphoesterase domain, apaH type"|IPR029052 "Metallo-dependent phosphatase-like"	Spondyloenchondrodysplasia with immune dysregulation, 607944
WBGene00008538	sqrd-1	F02H6.5	IV-10A17	ENSG00000137767	SQOR	6	Ensembl Compara 87-89|Homologene|InParanoid|OMA|OrthoInspector|OrthoMCL		IPR023753 "FAD/NAD(P)-binding domain"
WBGene00021183		Y9C9A.16	IV-8P18	ENSG00000137767	SQOR	6	Ensembl Compara 87-89|Homologene|InParanoid|OMA|OrthoInspector|OrthoMCL		IPR023753 "FAD/NAD(P)-binding domain"
WBGene00008546	gfat-1	F07A11.2	II-7L24	ENSG00000131459	GFPT2	6	Ensembl Compara 87-89|Homologene|InParanoid|OMA|OrthoInspector|OrthoMCL		IPR001347 "Sugar isomerase (SIS)"|IPR005855 "Glucosamine-fructose-6-phosphate aminotransferase, isomerising"|IPR029055 "Nucleophile aminohydrolases, N-terminal"
WBGene00009035	gfat-2	F22B3.4	IV-6I07	ENSG00000131459	GFPT2	6	Ensembl Compara 87-89|Homologene|InParanoid|OMA|OrthoInspector|OrthoMCL		IPR001347 "Sugar isomerase (SIS)"|IPR005855 "Glucosamine-fructose-6-phosphate aminotransferase, isomerising"|IPR029055 "Nucleophile aminohydrolases, N-terminal"
WBGene00019465	acl-14	K07B1.5	V-6H05	ENSG00000123684	LPGAT1	6	Ensembl Compara 87-89|Homologene|InParanoid|OMA|OrthoInspector|OrthoMCL	SM00563	IPR002123 "Phospholipid/glycerol acyltransferase"|IPR032098 "Acyltransferase, C-terminal domain"
WBGene00008586		F08G12.2		ENSG00000060688	SNRNP40	6	Ensembl Compara 87-89|Homologene|InParanoid|OMA|OrthoInspector|OrthoMCL	SM00320	IPR001680 "WD40 repeat"|IPR015943 "WD40/YVTN repeat-like-containing domain"|IPR017986 "WD40-repeat-containing domain"|IPR020472 "G-protein beta WD-40 repeat"
WBGene00015974		C18E3.5	I-1H18|I-1H20	ENSG00000060688	SNRNP40	6	Ensembl Compara 87-89|Homologene|InParanoid|OMA|OrthoInspector|OrthoMCL	SM00320	IPR001680 "WD40 repeat"|IPR015943 "WD40/YVTN repeat-like-containing domain"|IPR017986 "WD40-repeat-containing domain"|IPR020472 "G-protein beta WD-40 repeat"
WBGene00008606	dhhc-1	F09B12.2	X-7A19	ENSG00000174165	ZDHHC24	6	Ensembl Compara 87-89|Homologene|InParanoid|OMA|OrthoInspector|OrthoMCL		IPR001594 "Zinc finger, DHHC-type, palmitoyltransferase"
WBGene00012544		Y37D8A.2	III-6M10	ENSG00000151176	PLBD2	6	Ensembl Compara 87-89|Homologene|InParanoid|OMA|OrthoInspector|OrthoMCL		IPR007000 "Phospholipase B-like"
WBGene00008624		F09E8.2	IV-10A18	ENSG00000184164	CRELD2	6	Ensembl Compara 87-89|Homologene|InParanoid|OMA|OrthoInspector|OrthoMCL	SM00179|SM00181|SM00261	IPR000742 "EGF-like domain"|IPR001881 "EGF-like calcium-binding domain"|IPR009030 "Growth factor receptor cysteine-rich domain"|IPR021852 "Domain of unknown function DUF3456"
WBGene00008639		F10B5.2	II-10K20	ENSG00000131043	AAR2	6	Ensembl Compara 87-89|Homologene|InParanoid|OMA|OrthoInspector|OrthoMCL		IPR007946 "A1 cistron-splicing factor, AAR2"
WBGene00008642		F10B5.8	II-10C15	ENSG00000127054	INTS11	6	Ensembl Compara 87-89|Homologene|InParanoid|OMA|OrthoInspector|OrthoMCL	SM00849|SM01027	IPR001279 "Metallo-beta-lactamase"|IPR011108 "Zn-dependent metallo-hydrolase, RNA specificity domain"|IPR022712 "Beta-Casp domain"
WBGene00008645		F10C2.4	V-8G11	ENSG00000062822	POLD1	6	Ensembl Compara 87-89|Homologene|InParanoid|OMA|OrthoInspector|OrthoMCL	SM00486	IPR006133 "DNA-directed DNA polymerase, family B, exonuclease domain"|IPR006134 "DNA-directed DNA polymerase, family B, multifunctional domain"|IPR006172 "DNA-directed DNA polymerase, family B"|IPR012337 "Ribonuclease H-like domain"|IPR023211 "DNA polymerase, palm domain"|IPR025687 "C4-type zinc-finger of DNA polymerase delta"	Colorectal cancer, susceptibility to, 10, 612591|Mandibular hypoplasia, deafness, progeroid features, and lipodystrophy syndrome, 615381
WBGene00008654		F10F2.2	III-2G06	ENSG00000178921	PFAS	6	Ensembl Compara 87-89|Homologene|InParanoid|OMA|OrthoInspector|OrthoMCL	SM01211	IPR010073 "Phosphoribosylformylglycinamidine synthase"|IPR010918 "AIR synthase-related protein, C-terminal domain"|IPR016188 "PurM-like, N-terminal domain"|IPR029062 "Class I glutamine amidotransferase-like"
WBGene00008664	nubp-1	F10G8.6	I-5C21	ENSG00000103274	NUBP1	6	Ensembl Compara 87-89|Homologene|InParanoid|OMA|OrthoInspector|OrthoMCL	SM00382	IPR003593 "AAA+ ATPase domain"|IPR019591 "Mrp/NBP35 ATP-binding protein"|IPR027417 "P-loop containing nucleoside triphosphate hydrolase"
WBGene00011935	scrm-1	T22H2.5	I-5J16	ENSG00000188313	PLSCR1	6	Ensembl Compara 87-89|Homologene|InParanoid|OMA|OrthoInspector|OrthoMCL		IPR005552 "Scramblase"|IPR025659 "Tubby C-terminal-like domain"
WBGene00008685	mon-2	F11A10.4	IV-6M18	ENSG00000061987	MON2	6	Ensembl Compara 87-89|Homologene|InParanoid|OMA|OrthoInspector|OrthoMCL		IPR011989 "Armadillo-like helical"|IPR016024 "Armadillo-type fold"|IPR032629 "Mon2, dimerisation and cyclophilin-binding domain"|IPR032691 "Guanine nucleotide exchange factor, N-terminal"|IPR032817 "Mon2, C-terminal"
WBGene00008686		F11A10.5	IV-6M20	ENSG00000004866	ST7	6	Ensembl Compara 87-89|Homologene|InParanoid|OMA|OrthoInspector|OrthoMCL		IPR007311 "ST7"|IPR011990 "Tetratricopeptide-like helical domain"
WBGene00008693		F11C1.4	X-6I15	ENSG00000118961	LDAH	6	Ensembl Compara 87-89|Homologene|InParanoid|OMA|OrthoInspector|OrthoMCL		IPR019363 "Lipid droplet-associated hydrolase"|IPR029058 "Alpha/Beta hydrolase fold"
WBGene00009140		F26A3.1	I-3D14	ENSG00000118961	LDAH	6	Ensembl Compara 87-89|Homologene|InParanoid|OMA|OrthoInspector|OrthoMCL		IPR019363 "Lipid droplet-associated hydrolase"|IPR029058 "Alpha/Beta hydrolase fold"
WBGene00008694		F11C1.5	X-6I17	ENSG00000102763	VWA8	6	Ensembl Compara 87-89|Homologene|InParanoid|OMA|OrthoInspector|OrthoMCL	SM00327|SM00382	IPR002035 "von Willebrand factor, type A"|IPR011704 "ATPase, dynein-related, AAA domain"|IPR027417 "P-loop containing nucleoside triphosphate hydrolase"
WBGene00008706	gba-3	F11E6.1	IV-8I02|IV-8I22	ENSG00000177628	GBA	6	Ensembl Compara 87-89|Homologene|InParanoid|OMA|OrthoInspector|OrthoMCL		IPR001139 "Glycoside hydrolase family 30"|IPR013781 "Glycoside hydrolase, catalytic domain"|IPR017853 "Glycoside hydrolase superfamily"|IPR033452 "Glycosyl hydrolase family 30, beta sandwich domain"|IPR033453 "Glycosyl hydrolase family 30, TIM-barrel domain"	Gaucher disease, perinatal lethal, 608013|Gaucher disease, type I, 230800|Gaucher disease, type II, 230900|Gaucher disease, type III, 231000|Gaucher disease, type IIIC, 231005|Lewy body dementia, susceptibility to, 127750|Parkinson disease, late-onset, susceptibility to, 168600
WBGene00008733		F13B12.6	IV-9B14	ENSG00000104611	SH2D4A	6	Ensembl Compara 87-89|Homologene|InParanoid|OMA|OrthoInspector|OrthoMCL	SM00252	IPR000980 "SH2 domain"
WBGene00018756		F53C3.13	II-3J11	ENSG00000067113	PLPP1	6	Ensembl Compara 87-89|Homologene|InParanoid|OMA|OrthoInspector|OrthoMCL	SM00014	IPR000326 "Phosphatidic acid phosphatase type 2/haloperoxidase"
WBGene00008765	ttx-7	F13G3.5	I-3J13	ENSG00000133731	IMPA1	6	Ensembl Compara 87-89|Homologene|InParanoid|OMA|OrthoInspector|OrthoMCL		IPR000760 "Inositol monophosphatase"|IPR020552 "Inositol monophosphatase, Lithium-sensitive"	Mental retardation, autosomal recessive 59, 617323
WBGene00008767		F13G3.7	I-3J17	ENSG00000160785	SLC25A44	6	Ensembl Compara 87-89|Homologene|InParanoid|OMA|OrthoInspector|OrthoMCL		IPR018108 "Mitochondrial substrate/solute carrier"|IPR023395 "Mitochondrial carrier domain"
WBGene00008769	mrpl-13	F13G3.11	I-9M09	ENSG00000172172	MRPL13	6	Ensembl Compara 87-89|Homologene|InParanoid|OMA|OrthoInspector|OrthoMCL		IPR005822 "Ribosomal protein L13"
WBGene00008774		F13H10.3	IV-5H12	ENSG00000177058	SLC38A9	6	Ensembl Compara 87-89|Homologene|InParanoid|OMA|OrthoInspector|OrthoMCL		IPR013057 "Amino acid transporter, transmembrane domain"
WBGene00008775	mogs-1	F13H10.4	IV-5H14	ENSG00000115275	MOGS	6	Ensembl Compara 87-89|Homologene|InParanoid|OMA|OrthoInspector|OrthoMCL		IPR004888 "Glycoside hydrolase family 63"|IPR008928 "Six-hairpin glycosidase-like"|IPR031335 "Glycosyl hydrolase family 63, C-terminal"|IPR031631 "Glycosyl hydrolase family 63, N-terminal"	Congenital disorder of glycosylation, type IIb, 606056
WBGene00020195		T03G6.3	X-1N18	ENSG00000164303	ENPP6	6	Ensembl Compara 87-89|Homologene|InParanoid|OMA|OrthoInspector|OrthoMCL		IPR002591 "Type I phosphodiesterase/nucleotide pyrophosphatase/phosphate transferase"|IPR017849 "Alkaline phosphatase-like, alpha/beta/alpha"|IPR017850 "Alkaline-phosphatase-like, core domain"|IPR024873 "Ectonucleotide pyrophosphatase/phosphodiesterase family"
WBGene00008781	rpoa-2	F14B4.3	I-4H13	ENSG00000125630	POLR1B	6	Ensembl Compara 87-89|Homologene|InParanoid|OMA|OrthoInspector|OrthoMCL		IPR007120 "DNA-directed RNA polymerase, subunit 2, domain 6"|IPR007641 "RNA polymerase Rpb2, domain 7"|IPR007642 "RNA polymerase Rpb2, domain 2"|IPR007644 "RNA polymerase, beta subunit, protrusion"|IPR007645 "RNA polymerase Rpb2, domain 3"|IPR009674 "DNA-directed RNA polymerase I subunit RPA2, domain 4"|IPR015712 "DNA-directed RNA polymerase, subunit 2"
WBGene00008800		F14E5.2	II-6K15	ENSG00000090863	GLG1	6	Ensembl Compara 87-89|Homologene|InParanoid|OMA|OrthoInspector|OrthoMCL		IPR001893 "Cysteine-rich Golgi apparatus protein 1 repeat"
WBGene00011582	ntr-1	T07D10.2	I-6K10	ENSG00000166148	AVPR1A	6	Ensembl Compara 87-89|Homologene|InParanoid|OMA|OrthoInspector|OrthoMCL	SM01164	IPR000276 "G protein-coupled receptor, rhodopsin-like"
WBGene00008832	obr-2	F14H8.1	V-15A08	ENSG00000130703	OSBPL2	6	Ensembl Compara 87-89|Homologene|InParanoid|OMA|OrthoInspector|OrthoMCL		IPR000648 "Oxysterol-binding protein"	Deafness, autosomal dominant 67, 616340
WBGene00008856		F15D3.6	I-5F08	ENSG00000101166	PRELID3B	6	Ensembl Compara 87-89|Homologene|InParanoid|OMA|OrthoInspector|OrthoMCL		IPR006797 "PRELI/MSF1 domain"
WBGene00008876		F16A11.1	I-4L01	ENSG00000159579	RSPRY1	6	Ensembl Compara 87-89|Homologene|InParanoid|OMA|OrthoInspector|OrthoMCL	SM00184|SM00449	IPR001841 "Zinc finger, RING-type"|IPR003877 "SPRY domain"|IPR013083 "Zinc finger, RING/FYVE/PHD-type"|IPR013320 "Concanavalin A-like lectin/glucanase domain"	Spondyloepimetaphyseal dysplasia, Faden-Alkuraya type, 616723
WBGene00008877	rtcb-1	F16A11.2	I-4L03	ENSG00000100220	RTCB	6	Ensembl Compara 87-89|Homologene|InParanoid|OMA|OrthoInspector|OrthoMCL		IPR001233 "tRNA-splicing ligase, RtcB"
WBGene00008919	vps-36	F17C11.8	V-7D19	ENSG00000136100	VPS36	6	Ensembl Compara 87-89|Homologene|InParanoid|OMA|OrthoInspector|OrthoMCL		IPR007286 "EAP30"|IPR011991 "Winged helix-turn-helix DNA-binding domain"|IPR011993 "PH domain-like"|IPR021648 "Vacuolar protein sorting protein 36, GLUE domain"
WBGene00008924		F17E5.2	X-5N12	ENSG00000148339	SLC25A25	6	Ensembl Compara 87-89|Homologene|InParanoid|OMA|OrthoInspector|OrthoMCL	SM00054	IPR002048 "EF-hand domain"|IPR002067 "Mitochondrial carrier protein"|IPR011992 "EF-hand domain pair"|IPR018108 "Mitochondrial substrate/solute carrier"|IPR023395 "Mitochondrial carrier domain"
WBGene00008927	snx-17	F17H10.3	X-6M05	ENSG00000115234	SNX17	6	Ensembl Compara 87-89|Homologene|InParanoid|OMA|OrthoInspector|OrthoMCL	SM00312	IPR001683 "Phox homologous domain"
WBGene00010370	ctg-1	H06O01.3	I-3M22	ENSG00000100003	SEC14L2	6	Ensembl Compara 87-89|Homologene|InParanoid|OMA|OrthoInspector|OrthoMCL	SM00516|SM01100	IPR001251 "CRAL-TRIO lipid binding domain"|IPR009038 "GOLD domain"|IPR011074 "CRAL/TRIO, N-terminal domain"
WBGene00008939		F18H3.1	X-8M21	ENSG00000123178	SPRYD7	6	Ensembl Compara 87-89|Homologene|InParanoid|OMA|OrthoInspector|OrthoMCL	SM00449	IPR003877 "SPRY domain"|IPR013320 "Concanavalin A-like lectin/glucanase domain"
WBGene00008956	nekl-3	F19H6.1	X-5L22	ENSG00000151414	NEK7	6	Ensembl Compara 87-89|Homologene|InParanoid|OMA|OrthoInspector|OrthoMCL	SM00220	IPR000719 "Protein kinase domain"|IPR011009 "Protein kinase-like domain"
WBGene00008974	tbc-1	F20D1.2	X-6N24	ENSG00000036054	TBC1D23	6	Ensembl Compara 87-89|Homologene|InParanoid|OMA|OrthoInspector|OrthoMCL	SM00164	IPR000195 "Rab-GTPase-TBC domain"|IPR001763 "Rhodanese-like domain"	Pontocerebellar hypoplasia, type 11, 617695
WBGene00008979		F20D1.9	X-6P14	ENSG00000177542	SLC25A22	6	Ensembl Compara 87-89|Homologene|InParanoid|OMA|OrthoInspector|OrthoMCL		IPR002067 "Mitochondrial carrier protein"|IPR018108 "Mitochondrial substrate/solute carrier"|IPR023395 "Mitochondrial carrier domain"	Epileptic encephalopathy, early infantile, 3, 609304
WBGene00009002	hint-1	F21C3.3	I-3H21	ENSG00000169567	HINT1	6	Ensembl Compara 87-89|Homologene|InParanoid|OMA|OrthoInspector|OrthoMCL		IPR001310 "Histidine triad (HIT) protein"|IPR011146 "HIT-like domain"	Neuromyotonia and axonal neuropathy, autosomal recessive, 137200
WBGene00009006		F21D5.1	IV-4M18	ENSG00000013375	PGM3	6	Ensembl Compara 87-89|Homologene|InParanoid|OMA|OrthoInspector|OrthoMCL		IPR005843 "Alpha-D-phosphohexomutase, C-terminal"|IPR005844 "Alpha-D-phosphohexomutase, alpha/beta/alpha domain I"|IPR005846 "Alpha-D-phosphohexomutase, alpha/beta/alpha domain III"|IPR016055 "Alpha-D-phosphohexomutase, alpha/beta/alpha I/II/III"|IPR016657 "Phosphoacetylglucosamine mutase"	Immunodeficiency 23, 615816
WBGene00009007	otub-3	F21D5.2	IV-4M20	ENSG00000155100	OTUD6B	6	Ensembl Compara 87-89|Homologene|InParanoid|OMA|OrthoInspector|OrthoMCL		IPR003323 "OTU domain"	Intellectual developmental disorder with dysmorphic facies, seizures, and distal limb anomalies, 617452
WBGene00009010		F21D5.5	IV-4M24|IV-4O02|IV-4O08	ENSG00000039650	PNKP	6	Ensembl Compara 87-89|Homologene|InParanoid|OMA|OrthoInspector|OrthoMCL		IPR006549 "HAD-superfamily hydrolase,subfamily IIIA"|IPR006551 "Polynucleotide 3'-phosphatase"|IPR013954 "Polynucleotide kinase 3 phosphatase"|IPR023214 "HAD-like domain"|IPR027417 "P-loop containing nucleoside triphosphate hydrolase"	Ataxia-oculomotor apraxia 4, 616267|Microcephaly, seizures, and developmental delay, 613402
WBGene00009012		F21D5.7	IV-4O06	ENSG00000100883	SRP54	6	Ensembl Compara 87-89|Homologene|InParanoid|OMA|OrthoInspector|OrthoMCL	SM00382|SM00962|SM00963	IPR000897 "Signal recognition particle, SRP54 subunit, GTPase domain"|IPR003593 "AAA+ ATPase domain"|IPR004125 "Signal recognition particle, SRP54 subunit, M-domain"|IPR006325 "Signal recognition particle, SRP54 subunit, eukaryotic"|IPR013822 "Signal recognition particle, SRP54 subunit, helical bundle"|IPR027417 "P-loop containing nucleoside triphosphate hydrolase"
WBGene00009045		F22B5.10	II-6M17	ENSG00000143183	TMCO1	6	Ensembl Compara 87-89|Homologene|InParanoid|OMA|OrthoInspector|OrthoMCL	SM01415	IPR002809 "Protein of unknown function DUF106, transmembrane"|IPR008559 "Uncharacterised conserved protein UCP023322, transmembrane eukaryotic"	Craniofacial dysmorphism, skeletal anomalies, and mental retardation syndrome, 213980
WBGene00009048	cth-1	F22B8.6	V-10P21	ENSG00000116761	CTH	6	Ensembl Compara 87-89|Homologene|InParanoid|OMA|OrthoInspector|OrthoMCL		IPR000277 "Cys/Met metabolism, pyridoxal phosphate-dependent enzyme"|IPR015421 "Pyridoxal phosphate-dependent transferase, major region, subdomain 1"|IPR015422 "Pyridoxal phosphate-dependent transferase, major region, subdomain 2"|IPR015424 "Pyridoxal phosphate-dependent transferase"	Cystathioninuria, 219500|Homocysteine, total plasma, elevated
WBGene00022856	cth-2	ZK1127.10	II-5I22	ENSG00000116761	CTH	6	Ensembl Compara 87-89|Homologene|InParanoid|OMA|OrthoInspector|OrthoMCL		IPR000277 "Cys/Met metabolism, pyridoxal phosphate-dependent enzyme"|IPR015421 "Pyridoxal phosphate-dependent transferase, major region, subdomain 1"|IPR015422 "Pyridoxal phosphate-dependent transferase, major region, subdomain 2"|IPR015424 "Pyridoxal phosphate-dependent transferase"	Cystathioninuria, 219500|Homocysteine, total plasma, elevated
WBGene00009049		F22B8.7	V-10P23	ENSG00000186205	MARC1	6	Ensembl Compara 87-89|Homologene|InParanoid|OMA|OrthoInspector|OrthoMCL		IPR005302 "Molybdenum cofactor sulfurase, C-terminal"|IPR005303 "MOSC, N-terminal beta barrel"|IPR011037 "Pyruvate kinase-like, insert domain"
WBGene00018758		F53E10.1	V-2K06	ENSG00000186205	MARC1	6	Ensembl Compara 87-89|Homologene|InParanoid|OMA|OrthoInspector|OrthoMCL		IPR005302 "Molybdenum cofactor sulfurase, C-terminal"|IPR005303 "MOSC, N-terminal beta barrel"|IPR011037 "Pyruvate kinase-like, insert domain"
WBGene00018925		F56A11.5	IV-1O07	ENSG00000186205	MARC1	6	Ensembl Compara 87-89|Homologene|InParanoid|OMA|OrthoInspector|OrthoMCL		IPR005302 "Molybdenum cofactor sulfurase, C-terminal"|IPR005303 "MOSC, N-terminal beta barrel"|IPR011037 "Pyruvate kinase-like, insert domain"
WBGene00009051	nduf-6	F22D6.4	I-3O24	ENSG00000145494	NDUFS6	6	Ensembl Compara 87-89|Homologene|InParanoid|OMA|OrthoInspector|OrthoMCL		IPR016668 "NADH dehydrogenase [ubiquinone] (complex I), iron-sulphur protein 6, mitochondria"|IPR019401 "Zinc finger, CHCC-type"	Mitochondrial complex I deficiency, 252010
WBGene00009057	cept-1	F22E10.5	X-6E07	ENSG00000134255	CEPT1	6	Ensembl Compara 87-89|Homologene|InParanoid|OMA|OrthoInspector|OrthoMCL		IPR000462 "CDP-alcohol phosphatidyltransferase"|IPR014472 "Choline/ethanolamine phosphotransferase"
WBGene00013024	cept-2	Y49A3A.1	V-9O04	ENSG00000134255	CEPT1	6	Ensembl Compara 87-89|Homologene|InParanoid|OMA|OrthoInspector|OrthoMCL		IPR000462 "CDP-alcohol phosphatidyltransferase"|IPR014472 "Choline/ethanolamine phosphotransferase"
WBGene00009064		F22G12.4	I-6N07|I-9F12	ENSG00000185722	ANKFY1	6	Ensembl Compara 87-89|Homologene|InParanoid|OMA|OrthoInspector|OrthoMCL	SM00064|SM00225|SM00248	IPR000210 "BTB/POZ domain"|IPR000306 "FYVE zinc finger"|IPR002110 "Ankyrin repeat"|IPR011011 "Zinc finger, FYVE/PHD-type"|IPR011333 "SKP1/BTB/POZ domain"|IPR013083 "Zinc finger, RING/FYVE/PHD-type"|IPR020683 "Ankyrin repeat-containing domain"
WBGene00009082	dlat-1	F23B12.5	V-9B17	ENSG00000150768	DLAT	6	Ensembl Compara 87-89|Homologene|InParanoid|OMA|OrthoInspector|OrthoMCL		IPR000089 "Biotin/lipoyl attachment"|IPR001078 "2-oxoacid dehydrogenase acyltransferase, catalytic domain"|IPR004167 "E3-binding domain"|IPR006257 "Dihydrolipoyllysine-residue acetyltransferase component of pyruvate dehydrogenase complex"|IPR011053 "Single hybrid motif"|IPR023213 "Chloramphenicol acetyltransferase-like domain"	Pyruvate dehydrogenase E2 deficiency, 245348
WBGene00009084		F23B12.7	V-9B21	ENSG00000115816	CEBPZ	6	Ensembl Compara 87-89|Homologene|InParanoid|OMA|OrthoInspector|OrthoMCL		IPR005612 "CCAAT-binding factor"|IPR011989 "Armadillo-like helical"|IPR016024 "Armadillo-type fold"
WBGene00009092	tomm-20	F23H12.2	V-8C12	ENSG00000173726	TOMM20	6	Ensembl Compara 87-89|Homologene|InParanoid|OMA|OrthoInspector|OrthoMCL		IPR002056 "Protein import receptor MAS20"|IPR022422 "Protein import receptor MAS20, metazoan"|IPR023392 "Mitochondrial outer membrane translocase complex, subunit Tom20 domain"
WBGene00009100	rgef-1	F25B3.3		ENSG00000152689	RASGRP3	6	Ensembl Compara 87-89|Homologene|InParanoid|OMA|OrthoInspector|OrthoMCL	SM00054|SM00109|SM00147|SM00229	IPR001895 "Ras guanine-nucleotide exchange factors catalytic domain"|IPR002048 "EF-hand domain"|IPR002219 "Protein kinase C-like, phorbol ester/diacylglycerol-binding domain"|IPR011992 "EF-hand domain pair"|IPR020454 "Diacylglycerol/phorbol-ester binding"|IPR023578 "Ras guanine nucleotide exchange factor domain"
WBGene00009116	snx-27	F25H2.2	I-5E12	ENSG00000143376	SNX27	6	Ensembl Compara 87-89|Homologene|InParanoid|OMA|OrthoInspector|OrthoMCL	SM00228|SM00312	IPR001478 "PDZ domain"|IPR001683 "Phox homologous domain"
WBGene00009120		F25H2.6	I-5E20	ENSG00000113163	COL4A3BP	6	Ensembl Compara 87-89|Homologene|InParanoid|OMA|OrthoInspector|OrthoMCL	SM00233|SM00234	IPR001849 "Pleckstrin homology domain"|IPR002913 "START domain"|IPR011993 "PH domain-like"|IPR023393 "START-like domain"	Mental retardation, autosomal dominant 34, 616351
WBGene00009122	tct-1	F25H2.11	I-5G06	ENSG00000133112	TPT1	6	Ensembl Compara 87-89|Homologene|InParanoid|OMA|OrthoInspector|OrthoMCL		IPR011057 "Mss4-like"|IPR011323 "Mss4/translationally controlled tumour-associated TCTP"|IPR018105 "Translationally controlled tumour protein"
WBGene00009123		F25H2.12	I-5G08	ENSG00000143303	RRNAD1	6	Ensembl Compara 87-89|Homologene|InParanoid|OMA|OrthoInspector|OrthoMCL		IPR025714 "Methyltransferase domain"|IPR029063 "S-adenosyl-L-methionine-dependent methyltransferase"
WBGene00009126	pyk-1	F25H5.3	I-4F07	ENSG00000067225	PKM	6	Ensembl Compara 87-89|Homologene|InParanoid|OMA|OrthoInspector|OrthoMCL		IPR001697 "Pyruvate kinase"|IPR011037 "Pyruvate kinase-like, insert domain"|IPR015793 "Pyruvate kinase, barrel"|IPR015794 "Pyruvate kinase, alpha/beta"|IPR015795 "Pyruvate kinase, C-terminal"|IPR015806 "Pyruvate kinase, beta-barrel insert domain"|IPR015813 "Pyruvate/Phosphoenolpyruvate kinase-like domain"
WBGene00009131		F25H8.1	IV-5M03	ENSG00000145331	TRMT10A	6	Ensembl Compara 87-89|Homologene|InParanoid|OMA|OrthoInspector|OrthoMCL		IPR007356 "tRNA (guanine-N1-)-methyltransferase, eukaryotic"|IPR016009 "tRNA methyltransferase TRMD/TRM10-type domain"|IPR016653 "tRNA (guanine(9)-N(1))-methyltransferase TRM10"	Microcephaly, short stature, and impaired glucose metabolism 1, 616033
WBGene00009138		F25H9.6	V-8L08	ENSG00000138621	PPCDC	6	Ensembl Compara 87-89|Homologene|InParanoid|OMA|OrthoInspector|OrthoMCL		IPR003382 "Flavoprotein"
WBGene00009145		F26A3.7	I-3F02	ENSG00000133114	GPALPP1	6	Ensembl Compara 87-89|Homologene|InParanoid|OMA|OrthoInspector|OrthoMCL		IPR022226 "Protein of unknown function DUF3752"
WBGene00009158		F26E4.3	I-4J20	ENSG00000142910	TINAGL1	6	Ensembl Compara 87-89|Homologene|InParanoid|OMA|OrthoInspector|OrthoMCL	SM00645	IPR000668 "Peptidase C1A, papain C-terminal"|IPR013128 "Peptidase C1A"
WBGene00009164	hrdl-1	F26E4.11	I-4L12	ENSG00000159461	AMFR	6	Ensembl Compara 87-89|Homologene|InParanoid|OMA|OrthoInspector|OrthoMCL	SM00184|SM00546	IPR001841 "Zinc finger, RING-type"|IPR003892 "Ubiquitin system component Cue"|IPR013083 "Zinc finger, RING/FYVE/PHD-type"
WBGene00009177		F26H9.5	I-9H03	ENSG00000135069	PSAT1	6	Ensembl Compara 87-89|Homologene|InParanoid|OMA|OrthoInspector|OrthoMCL		IPR000192 "Aminotransferase class V domain"|IPR015421 "Pyridoxal phosphate-dependent transferase, major region, subdomain 1"|IPR015422 "Pyridoxal phosphate-dependent transferase, major region, subdomain 2"|IPR015424 "Pyridoxal phosphate-dependent transferase"|IPR022278 "Phosphoserine aminotransferase"	Neu-Laxova syndrome 2, 616038|Phosphoserine aminotransferase deficiency, 610992
WBGene00018604	uggt-1	F48E3.3	X-3L14	ENSG00000136731	UGGT1	6	Ensembl Compara 87-89|Homologene|InParanoid|OMA|OrthoInspector|OrthoMCL		IPR002495 "Glycosyl transferase, family 8"|IPR009448 "UDP-glucose:Glycoprotein Glucosyltransferase"|IPR029044 "Nucleotide-diphospho-sugar transferases"
WBGene00012810	nceh-1	Y43F8A.3	V-12D09|V-12P05|V-12P09	ENSG00000144959	NCEH1	6	Ensembl Compara 87-89|Homologene|InParanoid|OMA|OrthoInspector|OrthoMCL		IPR013094 "Alpha/beta hydrolase fold-3"|IPR017157 "Arylacetamide deacetylase"|IPR029058 "Alpha/Beta hydrolase fold"
WBGene00009187		F27D4.1	I-3F22	ENSG00000140374	ETFA	6	Ensembl Compara 87-89|Homologene|InParanoid|OMA|OrthoInspector|OrthoMCL	SM00893	IPR001308 "Electron transfer flavoprotein alpha subunit/FixB"|IPR014729 "Rossmann-like alpha/beta/alpha sandwich fold"|IPR014730 "Electron transfer flavoprotein, alpha/beta-subunit, N-terminal"|IPR014731 "Electron transfer flavoprotein, alpha subunit, C-terminal"|IPR029035 "DHS-like NAD/FAD-binding domain"	Glutaric acidemia IIA, 231680
WBGene00010769	asah-1	K11D2.2	I-6G18	ENSG00000104763	ASAH1	6	Ensembl Compara 87-89|Homologene|InParanoid|OMA|OrthoInspector|OrthoMCL		IPR016699 "Acid ceramidase-like"|IPR029130 "Acid ceramidase, N-terminal"|IPR029132 "Choloylglycine hydrolase/NAAA C-terminal"	Farber lipogranulomatosis, 228000|Spinal muscular atrophy with progressive myoclonic epilepsy, 159950
WBGene00009207		F28C6.8	II-6C18	ENSG00000110536	PTPMT1	6	Ensembl Compara 87-89|Homologene|InParanoid|OMA|OrthoInspector|OrthoMCL	SM00195	IPR000340 "Dual specificity phosphatase, catalytic domain"|IPR020422 "Dual specificity protein phosphatase domain"|IPR024950 "Dual specificity phosphatase"|IPR029021 "Protein-tyrosine phosphatase-like"
WBGene00009211	wdr-46	F28D1.1	IV-6H07	ENSG00000227057	WDR46	6	Ensembl Compara 87-89|Homologene|InParanoid|OMA|OrthoInspector|OrthoMCL	SM00320|SM01033	IPR001680 "WD40 repeat"|IPR012952 "BING4, C-terminal domain"|IPR015943 "WD40/YVTN repeat-like-containing domain"|IPR017986 "WD40-repeat-containing domain"
WBGene00009232	nkat-1	F28H6.3	X-6J05	ENSG00000137944	KYAT3	6	Ensembl Compara 87-89|Homologene|InParanoid|OMA|OrthoInspector|OrthoMCL		IPR004839 "Aminotransferase, class I/classII"|IPR015421 "Pyridoxal phosphate-dependent transferase, major region, subdomain 1"|IPR015422 "Pyridoxal phosphate-dependent transferase, major region, subdomain 2"|IPR015424 "Pyridoxal phosphate-dependent transferase"
WBGene00010984	nkat-3	R03A10.4	X-7I09	ENSG00000137944	KYAT3	6	Ensembl Compara 87-89|Homologene|InParanoid|OMA|OrthoInspector|OrthoMCL		IPR004839 "Aminotransferase, class I/classII"|IPR015421 "Pyridoxal phosphate-dependent transferase, major region, subdomain 1"|IPR015422 "Pyridoxal phosphate-dependent transferase, major region, subdomain 2"|IPR015424 "Pyridoxal phosphate-dependent transferase"
WBGene00009246	gfm-1	F29C12.4	II-8J09	ENSG00000168827	GFM1	6	Ensembl Compara 87-89|Homologene|InParanoid|OMA|OrthoInspector|OrthoMCL	SM00838|SM00889	IPR000640 "Translation elongation factor EFG, V domain"|IPR000795 "Transcription factor, GTP-binding domain"|IPR004161 "Translation elongation factor EFTu-like, domain 2"|IPR004540 "Translation elongation factor EFG/EF2"|IPR005225 "Small GTP-binding protein domain"|IPR005517 "Translation elongation factor EFG/EF2, domain IV"|IPR009000 "Translation protein, beta-barrel domain"|IPR009022 "Elongatio…	Combined oxidative phosphorylation deficiency 1, 609060
WBGene00009260	calm-1	F30A10.1	I-4N15	ENSG00000136425	CIB2	6	Ensembl Compara 87-89|Homologene|InParanoid|OMA|OrthoInspector|OrthoMCL	SM00054	IPR002048 "EF-hand domain"|IPR011992 "EF-hand domain pair"	Deafness, autosomal recessive 48, 609439|Usher syndrome, type IJ, 614869
WBGene00009262		F30A10.3	I-4N19	ENSG00000176095	IP6K1	6	Ensembl Compara 87-89|Homologene|InParanoid|OMA|OrthoInspector|OrthoMCL		IPR005522 "Inositol polyphosphate kinase"
WBGene00009264	sac-1	F30A10.6	I-4P01	ENSG00000211456	SACM1L	6	Ensembl Compara 87-89|Homologene|InParanoid|OMA|OrthoInspector|OrthoMCL		IPR002013 "SAC domain"
WBGene00009266		F30A10.9	I-4P07	ENSG00000119616	FCF1	6	Ensembl Compara 87-89|Homologene|InParanoid|OMA|OrthoInspector|OrthoMCL	SM00670	IPR002716 "PIN domain"|IPR006984 "rRNA-processing protein Fcf1/Utp23"|IPR029060 "PIN domain-like"
WBGene00009277		F30F8.10	I-3J14	ENSG00000122390	NAA60	6	Ensembl Compara 87-89|Homologene|InParanoid|OMA|OrthoInspector|OrthoMCL		IPR000182 "GNAT domain"|IPR016181 "Acyl-CoA N-acyltransferase"
WBGene00009285		F31C3.3	I-7O06	ENSG00000007202	KIAA0100	6	Ensembl Compara 87-89|Homologene|InParanoid|OMA|OrthoInspector|OrthoMCL	SM01214	IPR019409 "FMP27, domain of unknown function DUF2405"|IPR019441 "FMP27, GFWDK domain"|IPR019443 "FMP27, C-terminal"
WBGene00009287	psf-2	F31C3.5	I-7O10	ENSG00000131153	GINS2	6	Ensembl Compara 87-89|Homologene|InParanoid|OMA|OrthoInspector|OrthoMCL		IPR007257 "DNA replication complex GINS protein Psf2"|IPR021151 "GINS complex"
WBGene00009292		F31D4.5	V-13A18	ENSG00000175985	PLEKHD1	6	Ensembl Compara 87-89|Homologene|InParanoid|OMA|OrthoInspector|OrthoMCL	SM00233	IPR001849 "Pleckstrin homology domain"|IPR011993 "PH domain-like"
WBGene00009305		F32A7.4	I-9B20	ENSG00000165792	METTL17	6	Ensembl Compara 87-89|Homologene|InParanoid|OMA|OrthoInspector|OrthoMCL		IPR015324 "Ribosomal protein Rsm22, bacterial-type"|IPR029063 "S-adenosyl-L-methionine-dependent methyltransferase"
WBGene00011029	abhd-11.2	R05D7.4	I-9C04	ENSG00000106077	ABHD11	6	Ensembl Compara 87-89|Homologene|InParanoid|OMA|OrthoInspector|OrthoMCL		IPR000073 "Alpha/beta hydrolase fold-1"|IPR029058 "Alpha/Beta hydrolase fold"
WBGene00009319	mccc-1	F32B6.2	IV-5K07	ENSG00000078070	MCCC1	6	Ensembl Compara 87-89|Homologene|InParanoid|OMA|OrthoInspector|OrthoMCL	SM00878	IPR000089 "Biotin/lipoyl attachment"|IPR005479 "Carbamoyl-phosphate synthetase large subunit-like, ATP-binding domain"|IPR005481 "Biotin carboxylase-like, N-terminal domain"|IPR005482 "Biotin carboxylase, C-terminal"|IPR011053 "Single hybrid motif"|IPR011054 "Rudiment single hybrid motif"|IPR013815 "ATP-grasp fold, subdomain 1"|IPR013816 "ATP-grasp fold, subdomain 2"|IPR016185 "Pre-ATP-grasp doma…	3-Methylcrotonyl-CoA carboxylase 1 deficiency, 210200
WBGene00009320		F32B6.3	IV-5K09	ENSG00000165630	PRPF18	6	Ensembl Compara 87-89|Homologene|InParanoid|OMA|OrthoInspector|OrthoMCL	SM00500	IPR004098 "Prp18"|IPR014906 "Pre-mRNA processing factor 4 (PRP4)-like"
WBGene00009322	tbc-3	F32B6.8	IV-5K19	ENSG00000065491	TBC1D22B	6	Ensembl Compara 87-89|Homologene|InParanoid|OMA|OrthoInspector|OrthoMCL	SM00164	IPR000195 "Rab-GTPase-TBC domain"
WBGene00009334		F32D8.12	V-14H19	ENSG00000166816	LDHD	6	Ensembl Compara 87-89|Homologene|InParanoid|OMA|OrthoInspector|OrthoMCL		IPR004113 "FAD-linked oxidase, C-terminal"|IPR006094 "FAD linked oxidase, N-terminal"|IPR016164 "FAD-linked oxidase-like, C-terminal"|IPR016166 "FAD-binding, type 2"|IPR016167 "FAD-binding, type 2, subdomain 1"|IPR016169 "CO dehydrogenase flavoprotein-like, FAD-binding, subdomain 2"|IPR016171 "Vanillyl-alcohol oxidase, C-terminal subdomain 2"
WBGene00009335		F32D8.13	V-7B07	ENSG00000163344	PMVK	6	Ensembl Compara 87-89|Homologene|InParanoid|OMA|OrthoInspector|OrthoMCL		IPR005919 "Higher eukaryotic phosphomevalonate kinase"|IPR027417 "P-loop containing nucleoside triphosphate hydrolase"	Porokeratosis 1, multiple types, 175800
WBGene00009336		F32D8.14		ENSG00000145817	YIPF5	6	Ensembl Compara 87-89|Homologene|InParanoid|OMA|OrthoInspector|OrthoMCL		IPR006977 "Yip1 domain"
WBGene00009342	fasn-1	F32H2.5	I-4O12	ENSG00000169710	FASN	6	Ensembl Compara 87-89|Homologene|InParanoid|OMA|OrthoInspector|OrthoMCL	SM00822|SM00823|SM00825|SM00826|SM00827|SM00829	IPR001031 "Thioesterase"|IPR001227 "Acyl transferase domain"|IPR009081 "Phosphopantetheine binding ACP domain"|IPR011032 "GroES-like"|IPR013149 "Alcohol dehydrogenase, C-terminal"|IPR013968 "Polyketide synthase, ketoreductase domain"|IPR014030 "Beta-ketoacyl synthase, N-terminal"|IPR014031 "Beta-ketoacyl synthase, C-terminal"|IPR014043 "Acyl transferase"|IPR016035 "Acyl transferase/acyl hydrolase…
WBGene00009352		F33A8.4	II-10C19|II-7J17	ENSG00000168228	ZCCHC4	6	Ensembl Compara 87-89|Homologene|InParanoid|OMA|OrthoInspector|OrthoMCL		IPR019369 "Protein-lysine N-methyltransferase Efm5"
WBGene00009354		F33A8.6	II-11F01	ENSG00000132323	ILKAP	6	Ensembl Compara 87-89|Homologene|InParanoid|OMA|OrthoInspector|OrthoMCL	SM00332	IPR001932 "PPM-type phosphatase domain"|IPR015655 "Protein phosphatase 2C family"
WBGene00009368	pole-1	F33H2.5	I-7M18	ENSG00000177084	POLE	6	Ensembl Compara 87-89|Homologene|InParanoid|OMA|OrthoInspector|OrthoMCL	SM00486|SM01159	IPR006133 "DNA-directed DNA polymerase, family B, exonuclease domain"|IPR006134 "DNA-directed DNA polymerase, family B, multifunctional domain"|IPR006172 "DNA-directed DNA polymerase, family B"|IPR012337 "Ribonuclease H-like domain"|IPR013697 "DNA polymerase epsilon, catalytic subunit A, C-terminal"|IPR029703 "DNA polymerase epsilon catalytic subunit"	Colorectal cancer, susceptibility to, 12, 615083|FILS syndrome, 615139
WBGene00009369		F33H2.6	I-7M20	ENSG00000176623	RMDN1	6	Ensembl Compara 87-89|Homologene|InParanoid|OMA|OrthoInspector|OrthoMCL		IPR011990 "Tetratricopeptide-like helical domain"
WBGene00009372	evl-18	F34D10.2	III-1J14	ENSG00000093009	CDC45	6	Ensembl Compara 87-89|Homologene|InParanoid|OMA|OrthoInspector|OrthoMCL		IPR003874 "CDC45 family"	Meier-Gorlin syndrome 7, 617063
WBGene00018533		F47B7.2	X-2K16	ENSG00000116260	QSOX1	6	Ensembl Compara 87-89|Homologene|InParanoid|OMA|OrthoInspector|OrthoMCL		IPR012336 "Thioredoxin-like fold"|IPR013766 "Thioredoxin domain"|IPR017905 "ERV/ALR sulfhydryl oxidase domain"
WBGene00009439	mlcd-1	F35G12.1	III-2E04	ENSG00000103150	MLYCD	6	Ensembl Compara 87-89|Homologene|InParanoid|OMA|OrthoInspector|OrthoMCL		IPR007956 "Malonyl-CoA decarboxylase"	Malonyl-CoA decarboxylase deficiency, 248360
WBGene00009440	idhg-1	F35G12.2	III-8C02	ENSG00000067829	IDH3G	6	Ensembl Compara 87-89|Homologene|InParanoid|OMA|OrthoInspector|OrthoMCL	SM01329	IPR001804 "Isocitrate and isopropylmalate dehydrogenases family"|IPR004434 "Isocitrate dehydrogenase NAD-dependent"|IPR024084 "Isopropylmalate dehydrogenase-like domain"
WBGene00009441	wdr-48	F35G12.4	III-2E10	ENSG00000114742	WDR48	6	Ensembl Compara 87-89|Homologene|InParanoid|OMA|OrthoInspector|OrthoMCL	SM00320	IPR001680 "WD40 repeat"|IPR015943 "WD40/YVTN repeat-like-containing domain"|IPR017986 "WD40-repeat-containing domain"|IPR020472 "G-protein beta WD-40 repeat"|IPR021772 "Protein of unknown function DUF3337"
WBGene00011892		T21C9.4	V-7G04	ENSG00000100632	ERH	6	Ensembl Compara 87-89|Homologene|InParanoid|OMA|OrthoInspector|OrthoMCL		IPR000781 "Enhancer of rudimentary"
WBGene00009452		F36A2.2	I-4I14	ENSG00000169718	DUS1L	6	Ensembl Compara 87-89|Homologene|InParanoid|OMA|OrthoInspector|OrthoMCL		IPR001269 "tRNA-dihydrouridine synthase"|IPR013785 "Aldolase-type TIM barrel"
WBGene00009498	tat-5	F36H2.1	I-4H03	ENSG00000166377	ATP9B	6	Ensembl Compara 87-89|Homologene|InParanoid|OMA|OrthoInspector|OrthoMCL		IPR001757 "P-type ATPase"|IPR006539 "P-type ATPase, subfamily IV"|IPR008250 "P-type ATPase, A domain"|IPR023214 "HAD-like domain"|IPR023299 "P-type ATPase, cytoplasmic domain N"|IPR032630 "P-type ATPase, C-terminal"|IPR032631 "P-type ATPase, N-terminal"
WBGene00009521		F38A1.8	IV-1K18|IV-1M14	ENSG00000182934	SRPRA	6	Ensembl Compara 87-89|Homologene|InParanoid|OMA|OrthoInspector|OrthoMCL	SM00382|SM00962|SM00963	IPR000897 "Signal recognition particle, SRP54 subunit, GTPase domain"|IPR003593 "AAA+ ATPase domain"|IPR007222 "Signal recognition particle receptor, alpha subunit, N-terminal"|IPR011012 "Longin-like domain"|IPR013822 "Signal recognition particle, SRP54 subunit, helical bundle"|IPR027417 "P-loop containing nucleoside triphosphate hydrolase"
WBGene00009554		F39B2.3	I-7G12	ENSG00000116791	CRYZ	6	Ensembl Compara 87-89|Homologene|InParanoid|OMA|OrthoInspector|OrthoMCL	SM00829	IPR002085 "Alcohol dehydrogenase superfamily, zinc-type"|IPR011032 "GroES-like"|IPR013149 "Alcohol dehydrogenase, C-terminal"|IPR013154 "Alcohol dehydrogenase, N-terminal"|IPR016040 "NAD(P)-binding domain"|IPR020843 "Polyketide synthase, enoylreductase domain"
WBGene00009557	mtcu-1	F39B2.7	I-7G20	ENSG00000130299	GTPBP3	6	Ensembl Compara 87-89|Homologene|InParanoid|OMA|OrthoInspector|OrthoMCL		IPR004520 "tRNA modification GTPase MnmE"|IPR005225 "Small GTP-binding protein domain"|IPR006073 "GTP binding domain"|IPR018948 "GTP-binding protein TrmE, N-terminal"|IPR025867 "MnmE, helical domain"|IPR027266 "GTP-binding protein TrmE/Glycine cleavage system T protein, domain 1"|IPR027368 "tRNA modification GTPase MnmE domain 2"|IPR027417 "P-loop containing nucleoside triphosphate hydrolase"	Combined oxidative phosphorylation deficiency 23, 616198
WBGene00009563		F39H2.3	I-4C20	ENSG00000181873	IBA57	6	Ensembl Compara 87-89|Homologene|InParanoid|OMA|OrthoInspector|OrthoMCL		IPR006222 "Glycine cleavage T-protein-like, N-terminal"|IPR013977 "Glycine cleavage T-protein, C-terminal barrel domain"|IPR017703 "YgfZ/GcvT conserved site"	Multiple mitochondrial dysfunctions syndrome 3, 615330|Spastic paraplegia 74, autosomal recessive, 616451
WBGene00009574		F40E10.6	X-6H08	ENSG00000198792	TMEM184B	6	Ensembl Compara 87-89|Homologene|InParanoid|OMA|OrthoInspector|OrthoMCL		IPR005178 "Organic solute transporter subunit alpha/Transmembrane protein 184"
WBGene00009583	aagr-3	F40F9.6	V-14H22	ENSG00000089597	GANAB	6	Ensembl Compara 87-89|Homologene|InParanoid|OMA|OrthoInspector|OrthoMCL		IPR000322 "Glycoside hydrolase family 31"|IPR011013 "Galactose mutarotase-like domain"|IPR017853 "Glycoside hydrolase superfamily"|IPR025887 "Glycoside hydrolase family 31, N-terminal domain"|IPR033403 "Domain of unknown function DUF5110"	Polycystic kidney disease 3, 600666
WBGene00009617		F41E7.1	X-5E01	ENSG00000164037	SLC9B1	6	Ensembl Compara 87-89|Homologene|InParanoid|OMA|OrthoInspector|OrthoMCL		IPR006153 "Cation/H+ exchanger"
WBGene00009618		F41E7.2	X-5E03	ENSG00000164037	SLC9B1	6	Ensembl Compara 87-89|Homologene|InParanoid|OMA|OrthoInspector|OrthoMCL		IPR006153 "Cation/H+ exchanger"
WBGene00010214		F57G8.5	V-10N04	ENSG00000164037	SLC9B1	6	Ensembl Compara 87-89|Homologene|InParanoid|OMA|OrthoInspector|OrthoMCL		IPR006153 "Cation/H+ exchanger"
WBGene00011850		T20B3.1	V-11A04	ENSG00000005469	CROT	6	Ensembl Compara 87-89|Homologene|InParanoid|OMA|OrthoInspector|OrthoMCL		IPR000542 "Acyltransferase ChoActase/COT/CPT"
WBGene00009628	tatn-1	F42D1.2		ENSG00000198650	TAT	6	Ensembl Compara 87-89|Homologene|InParanoid|OMA|OrthoInspector|OrthoMCL		IPR004839 "Aminotransferase, class I/classII"|IPR005957 "Tyrosine aminotransferase"|IPR005958 "Tyrosine/nicotianamine aminotransferase"|IPR015421 "Pyridoxal phosphate-dependent transferase, major region, subdomain 1"|IPR015422 "Pyridoxal phosphate-dependent transferase, major region, subdomain 2"|IPR015424 "Pyridoxal phosphate-dependent transferase"	Tyrosinemia, type II, 276600
WBGene00009654	sly-1	F43D9.3	III-5J15	ENSG00000092108	SCFD1	6	Ensembl Compara 87-89|Homologene|InParanoid|OMA|OrthoInspector|OrthoMCL		IPR001619 "Sec1-like protein"|IPR027482 "Sec1-like, domain 2"
WBGene00009664	idha-1	F43G9.1	I-4A14	ENSG00000166411	IDH3A	6	Ensembl Compara 87-89|Homologene|InParanoid|OMA|OrthoInspector|OrthoMCL	SM01329	IPR001804 "Isocitrate and isopropylmalate dehydrogenases family"|IPR004434 "Isocitrate dehydrogenase NAD-dependent"|IPR024084 "Isopropylmalate dehydrogenase-like domain"
WBGene00009668	cfim-1	F43G9.5	I-4A22	ENSG00000167005	NUDT21	6	Ensembl Compara 87-89|Homologene|InParanoid|OMA|OrthoInspector|OrthoMCL		IPR015797 "NUDIX hydrolase domain-like"|IPR016706 "Cleavage/polyadenylation specificity factor subunit 5"
WBGene00009671	mfap-1	F43G9.10	I-4C08	ENSG00000140259	MFAP1	6	Ensembl Compara 87-89|Homologene|InParanoid|OMA|OrthoInspector|OrthoMCL		IPR009730 "Micro-fibrillar-associated protein 1, C-terminal"
WBGene00009672		F43G9.12	I-4C12	ENSG00000159086	PAXBP1	6	Ensembl Compara 87-89|Homologene|InParanoid|OMA|OrthoInspector|OrthoMCL		IPR012890 "GC-rich sequence DNA-binding factor"|IPR022783 "GC-rich sequence DNA-binding factor domain"|IPR028211 "Pre-mRNA-splicing factor Ntr2"
WBGene00009674	nucb-1	F44A6.1	X-8B12	ENSG00000070081	NUCB2	6	Ensembl Compara 87-89|Homologene|InParanoid|OMA|OrthoInspector|OrthoMCL	SM00054	IPR011992 "EF-hand domain pair"
WBGene00009681	gipc-2	F44D12.4	IV-10E07|IV-5O19	ENSG00000123159	GIPC1	6	Ensembl Compara 87-89|Homologene|InParanoid|OMA|OrthoInspector|OrthoMCL	SM00228	IPR001478 "PDZ domain"
WBGene00016440	gipc-1	C35D10.2	III-2B17	ENSG00000123159	GIPC1	6	Ensembl Compara 87-89|Homologene|InParanoid|OMA|OrthoInspector|OrthoMCL	SM00228	IPR001478 "PDZ domain"
WBGene00009711		F44G4.1	II-6B21	ENSG00000117133	RPF1	6	Ensembl Compara 87-89|Homologene|InParanoid|OMA|OrthoInspector|OrthoMCL	SM00879	IPR004154 "Anticodon-binding"|IPR007109 "Brix domain"
WBGene00009726	tbc-13	F45E6.3	X-5P12	ENSG00000107021	TBC1D13	6	Ensembl Compara 87-89|Homologene|InParanoid|OMA|OrthoInspector|OrthoMCL	SM00164	IPR000195 "Rab-GTPase-TBC domain"
WBGene00009732	cope-1	F45G2.4	III-6L23	ENSG00000105669	COPE	6	Ensembl Compara 87-89|Homologene|InParanoid|OMA|OrthoInspector|OrthoMCL		IPR002885 "Pentatricopeptide repeat"|IPR006822 "Coatomer, epsilon subunit"|IPR011990 "Tetratricopeptide-like helical domain"
WBGene00009734		F45G2.8	III-8M04	ENSG00000217930	PAM16	6	Ensembl Compara 87-89|Homologene|InParanoid|OMA|OrthoInspector|OrthoMCL		IPR005341 "Mitochondrial import inner membrane translocase subunit Tim16"	Spondylometaphyseal dysplasia, Megarbane-Dagher-Melike type, 613320
WBGene00009736		F45G2.10		ENSG00000166595	FAM96B	6	Ensembl Compara 87-89|Homologene|InParanoid|OMA|OrthoInspector|OrthoMCL		IPR002744 "Domain of unknown function DUF59"
WBGene00009769		F46B6.4	V-6H12	ENSG00000178605	GTPBP6	6	Ensembl Compara 87-89|Homologene|InParanoid|OMA|OrthoInspector|OrthoMCL		IPR006073 "GTP binding domain"|IPR016496 "GTPase HflX"|IPR025121 "GTPase HflX, N-terminal"|IPR027417 "P-loop containing nucleoside triphosphate hydrolase"
WBGene00009771		F46B6.6	V-6H16	ENSG00000085760	MTIF2	6	Ensembl Compara 87-89|Homologene|InParanoid|OMA|OrthoInspector|OrthoMCL		IPR005225 "Small GTP-binding protein domain"|IPR009000 "Translation protein, beta-barrel domain"|IPR023115 "Translation initiation factor IF- 2, domain 3"|IPR027417 "P-loop containing nucleoside triphosphate hydrolase"
WBGene00009772	ztf-7	F46B6.7		ENSG00000198839	ZNF277	6	Ensembl Compara 87-89|Homologene|InParanoid|OMA|OrthoInspector|OrthoMCL	SM00355	IPR015880 "Zinc finger, C2H2-like"
WBGene00009776		F46B6.12	V-15K05	ENSG00000162384	C1orf123	6	Ensembl Compara 87-89|Homologene|InParanoid|OMA|OrthoInspector|OrthoMCL		IPR008584 "Protein of unknown function DUF866, eukaryotic"
WBGene00009783	rer-1	F46C5.8	II-6M10	ENSG00000157916	RER1	6	Ensembl Compara 87-89|Homologene|InParanoid|OMA|OrthoInspector|OrthoMCL		IPR004932 "Retrieval of early ER protein Rer1"
WBGene00009784		F46C5.9	II-6M12	ENSG00000106638	TBL2	6	Ensembl Compara 87-89|Homologene|InParanoid|OMA|OrthoInspector|OrthoMCL	SM00320	IPR001680 "WD40 repeat"|IPR015943 "WD40/YVTN repeat-like-containing domain"|IPR017986 "WD40-repeat-containing domain"
WBGene00009812	suca-1	F47B10.1	X-5C02	ENSG00000136143	SUCLA2	6	Ensembl Compara 87-89|Homologene|InParanoid|OMA|OrthoInspector|OrthoMCL		IPR005809 "Succinyl-CoA synthetase, beta subunit"|IPR005811 "ATP-citrate lyase/succinyl-CoA ligase"|IPR013650 "ATP-grasp fold, succinyl-CoA synthetase-type"|IPR013815 "ATP-grasp fold, subdomain 1"|IPR013816 "ATP-grasp fold, subdomain 2"|IPR016102 "Succinyl-CoA synthetase-like"	Mitochondrial DNA depletion syndrome 5 (encephalomyopathic with or without methylmalonic aciduria), 6120
WBGene00010778	gpdh-2	K11H3.1	III-5E02	ENSG00000167588	GPD1	6	Ensembl Compara 87-89|Homologene|InParanoid|OMA|OrthoInspector|OrthoMCL		IPR006109 "Glycerol-3-phosphate dehydrogenase, NAD-dependent, C-terminal"|IPR006168 "Glycerol-3-phosphate dehydrogenase, NAD-dependent"|IPR008927 "6-phosphogluconate dehydrogenase C-terminal domain-like"|IPR011128 "Glycerol-3-phosphate dehydrogenase, NAD-dependent, N-terminal"|IPR013328 "6-phosphogluconate dehydrogenase, domain 2"|IPR016040 "NAD(P)-binding domain"|IPR017751 "Glycerol-3-phosphate …	Hypertriglyceridemia, transient infantile, 614480
WBGene00009831		F47G9.4	V-7P21	ENSG00000158286	RNF207	6	Ensembl Compara 87-89|Homologene|InParanoid|OMA|OrthoInspector|OrthoMCL	SM00184	IPR000315 "B-box-type zinc finger"|IPR001841 "Zinc finger, RING-type"|IPR013083 "Zinc finger, RING/FYVE/PHD-type"|IPR022782 "Actin interacting protein 3, C-terminal"
WBGene00020096		R144.6	III-2J17	ENSG00000164124	TMEM144	6	Ensembl Compara 87-89|Homologene|InParanoid|OMA|OrthoInspector|OrthoMCL		IPR012435 "TMEM144"
WBGene00020933		W02D3.4	I-3C24	ENSG00000164124	TMEM144	6	Ensembl Compara 87-89|Homologene|InParanoid|OMA|OrthoInspector|OrthoMCL		IPR012435 "TMEM144"
WBGene00009902	drd-1	F49E12.9	II-6K09	ENSG00000170271	FAXDC2	6	Ensembl Compara 87-89|Homologene|InParanoid|OMA|OrthoInspector|OrthoMCL		IPR006694 "Fatty acid hydroxylase"
WBGene00009920	abts-1	F52B5.1	I-4G09	ENSG00000033867	SLC4A7	6	Ensembl Compara 87-89|Homologene|InParanoid|OMA|OrthoInspector|OrthoMCL		IPR003020 "Bicarbonate transporter, eukaryotic"|IPR003024 "Sodium bicarbonate cotransporter"|IPR011531 "Bicarbonate transporter, C-terminal"|IPR013769 "Band 3 cytoplasmic domain"|IPR016152 "Phosphotransferase/anion transporter"
WBGene00009925		F52B11.2	IV-7M04	ENSG00000140650	PMM2	6	Ensembl Compara 87-89|Homologene|InParanoid|OMA|OrthoInspector|OrthoMCL		IPR005002 "Eukaryotic phosphomannomutase"|IPR006379 "HAD-superfamily hydrolase, subfamily IIB"|IPR023214 "HAD-like domain"	Congenital disorder of glycosylation, type Ia, 212065
WBGene00019018	abts-3	F57F10.1	II-10G13	ENSG00000088836	SLC4A11	6	Ensembl Compara 87-89|Homologene|InParanoid|OMA|OrthoInspector|OrthoMCL		IPR002178 "PTS EIIA type-2 domain"|IPR003020 "Bicarbonate transporter, eukaryotic"|IPR011531 "Bicarbonate transporter, C-terminal"|IPR016152 "Phosphotransferase/anion transporter"	Corneal dystrophy, Fuchs endothelial, 4, 613268|Corneal endothelial dystrophy and perceptive deafness, 217400|Corneal endothelial dystrophy, autosomal recessive, 217700
WBGene00009944	mtcu-2	F52H3.2	II-7I11	ENSG00000135297	MTO1	6	Ensembl Compara 87-89|Homologene|InParanoid|OMA|OrthoInspector|OrthoMCL	SM01228	IPR002218 "tRNA uridine 5-carboxymethylaminomethyl modification enzyme MnmG-related"|IPR004416 "tRNA uridine 5-carboxymethylaminomethyl modification enzyme MnmG"|IPR023753 "FAD/NAD(P)-binding domain"|IPR026904 "GidA associated domain 3"	Combined oxidative phosphorylation deficiency 10, 614702
WBGene00009947		F52H3.5	II-7I17	ENSG00000172425	TTC36	6	Ensembl Compara 87-89|Homologene|InParanoid|OMA|OrthoInspector|OrthoMCL	SM00028	IPR011990 "Tetratricopeptide-like helical domain"|IPR019734 "Tetratricopeptide repeat"
WBGene00009952	acaa-2	F53A2.7	III-8G22	ENSG00000167315	ACAA2	6	Ensembl Compara 87-89|Homologene|InParanoid|OMA|OrthoInspector|OrthoMCL		IPR002155 "Thiolase"|IPR016039 "Thiolase-like"|IPR020616 "Thiolase, N-terminal"|IPR020617 "Thiolase, C-terminal"
WBGene00011237	gkow-1	R11A8.2		ENSG00000068394	GPKOW	6	Ensembl Compara 87-89|Homologene|InParanoid|OMA|OrthoInspector|OrthoMCL	SM00443|SM00739	IPR000467 "G-patch domain"|IPR005824 "KOW"|IPR026822 "Spp2/MOS2, G-patch domain"
WBGene00009976	swan-2	F53C11.7	V-9G11	ENSG00000136485	DCAF7	6	Ensembl Compara 87-89|Homologene|InParanoid|OMA|OrthoInspector|OrthoMCL	SM00320	IPR001680 "WD40 repeat"|IPR015943 "WD40/YVTN repeat-like-containing domain"|IPR017986 "WD40-repeat-containing domain"
WBGene00009978		F53E4.1		ENSG00000124702	KLHDC3	6	Ensembl Compara 87-89|Homologene|InParanoid|OMA|OrthoInspector|OrthoMCL		IPR011498 "Kelch repeat type 2"|IPR015915 "Kelch-type beta propeller"|IPR015916 "Galactose oxidase, beta-propeller"
WBGene00009987	tbcb-1	F53F4.3		ENSG00000105254	TBCB	6	Ensembl Compara 87-89|Homologene|InParanoid|OMA|OrthoInspector|OrthoMCL	SM01052	IPR000626 "Ubiquitin domain"|IPR000938 "CAP Gly-rich domain"|IPR029071 "Ubiquitin-related domain"
WBGene00009992		F53F4.10	V-9A03	ENSG00000178127	NDUFV2	6	Ensembl Compara 87-89|Homologene|InParanoid|OMA|OrthoInspector|OrthoMCL		IPR002023 "NADH-quinone oxidoreductase subunit E-like"|IPR012336 "Thioredoxin-like fold"	Mitochondrial complex I deficiency, 252010
WBGene00010015	atad-3	F54B3.3	II-7A04	ENSG00000197785	ATAD3A	6	Ensembl Compara 87-89|Homologene|InParanoid|OMA|OrthoInspector|OrthoMCL	SM00382	IPR003593 "AAA+ ATPase domain"|IPR003959 "ATPase, AAA-type, core"|IPR021911 "ATPase family AAA domain-containing protein 3, domain of unknown function DUF3523"|IPR027417 "P-loop containing nucleoside triphosphate hydrolase"	Harel-Yoon syndrome, 617183
WBGene00010038	rheb-1	F54C8.5	III-5C23	ENSG00000106615	RHEB	6	Ensembl Compara 87-89|Homologene|InParanoid|OMA|OrthoInspector|OrthoMCL	SM00173|SM00174|SM00175	IPR001806 "Small GTPase superfamily"|IPR005225 "Small GTP-binding protein domain"|IPR020849 "Small GTPase superfamily, Ras type"|IPR027417 "P-loop containing nucleoside triphosphate hydrolase"
WBGene00010042	bcs-1	F54C9.6	II-6A16	ENSG00000074582	BCS1L	6	Ensembl Compara 87-89|Homologene|InParanoid|OMA|OrthoInspector|OrthoMCL	SM00382|SM01024	IPR003593 "AAA+ ATPase domain"|IPR003959 "ATPase, AAA-type, core"|IPR014851 "BCS1, N-terminal"|IPR027243 "Mitochondrial chaperone BCS1/plant AAA ATPases"|IPR027417 "P-loop containing nucleoside triphosphate hydrolase"	Bjornstad syndrome, 262000|GRACILE syndrome, 603358|Leigh syndrome, 256000|Mitochondrial complex III deficiency, nuclear type 1, 124000
WBGene00010045		F54C9.11	II-6C02	ENSG00000167994	RAB3IL1	6	Ensembl Compara 87-89|Homologene|InParanoid|OMA|OrthoInspector|OrthoMCL
WBGene00010052		F54D5.7	II-10K24	ENSG00000105607	GCDH	6	Ensembl Compara 87-89|Homologene|InParanoid|OMA|OrthoInspector|OrthoMCL		IPR006091 "Acyl-CoA oxidase/dehydrogenase, central domain"|IPR009075 "Acyl-CoA dehydrogenase/oxidase C-terminal"|IPR009100 "Acyl-CoA dehydrogenase/oxidase, N-terminal and middle domain"|IPR013786 "Acyl-CoA dehydrogenase/oxidase, N-terminal"	Glutaricaciduria, type I, 231670
WBGene00010054		F54D5.11	II-7L12	ENSG00000197265	GTF2E2	6	Ensembl Compara 87-89|Homologene|InParanoid|OMA|OrthoInspector|OrthoMCL		IPR003166 "Transcription factor TFIIE beta subunit, DNA-binding domain"|IPR011991 "Winged helix-turn-helix DNA-binding domain"|IPR016656 "Transcription initiation factor TFIIE, beta subunit"	Trichothiodystrophy 6, nonphotosensitive, 616943
WBGene00010055		F54D5.12	II-7J18|II-7L14	ENSG00000180902	D2HGDH	6	Ensembl Compara 87-89|Homologene|InParanoid|OMA|OrthoInspector|OrthoMCL		IPR004113 "FAD-linked oxidase, C-terminal"|IPR006094 "FAD linked oxidase, N-terminal"|IPR016164 "FAD-linked oxidase-like, C-terminal"|IPR016166 "FAD-binding, type 2"|IPR016167 "FAD-binding, type 2, subdomain 1"|IPR016169 "CO dehydrogenase flavoprotein-like, FAD-binding, subdomain 2"|IPR016171 "Vanillyl-alcohol oxidase, C-terminal subdomain 2"	D-2-hydroxyglutaric aciduria, 600721
WBGene00010075		F55A11.1	V-7P04	ENSG00000180398	MCFD2	6	Ensembl Compara 87-89|Homologene|InParanoid|OMA|OrthoInspector|OrthoMCL		IPR002048 "EF-hand domain"|IPR011992 "EF-hand domain pair"	Factor V and factor VIII, combined deficiency of, 613625
WBGene00010083		F55B11.1	IV-7D05	ENSG00000158125	XDH	6	Ensembl Compara 87-89|Homologene|InParanoid|OMA|OrthoInspector|OrthoMCL	SM01008|SM01092	IPR000674 "Aldehyde oxidase/xanthine dehydrogenase, a/b hammerhead"|IPR001041 "2Fe-2S ferredoxin-type iron-sulfur binding domain"|IPR002346 "Molybdopterin dehydrogenase, FAD-binding"|IPR002888 "[2Fe-2S]-binding"|IPR005107 "CO dehydrogenase flavoprotein, C-terminal"|IPR008274 "Aldehyde oxidase/xanthine dehydrogenase, molybdopterin binding"|IPR012675 "Beta-grasp domain"|IPR014307 "Xanthine dehydrog…	Xanthinuria, type I, 278300
WBGene00010089	hpo-31	F55B12.4	V-9G21	ENSG00000072756	TRNT1	6	Ensembl Compara 87-89|Homologene|InParanoid|OMA|OrthoInspector|OrthoMCL		IPR002646 "Poly A polymerase, head domain"|IPR032828 "tRNA nucleotidyltransferase/poly(A) polymerase, RNA and SrmB- binding domain"	Retinitis pigmentosa and erythrocytic microcytosis, 616959|Sideroblastic anemia with B-cell immunodeficiency, periodic fevers, and developmental delay, 616084
WBGene00010094	tsfm-1	F55C5.5	V-8A12	ENSG00000123297	TSFM	6	Ensembl Compara 87-89|Homologene|InParanoid|OMA|OrthoInspector|OrthoMCL		IPR001816 "Translation elongation factor EFTs/EF1B"|IPR009060 "UBA-like"|IPR014039 "Translation elongation factor EFTs/EF1B, dimerisation"	Combined oxidative phosphorylation deficiency 3, 610505
WBGene00010111		F55D12.2	I-3L10	ENSG00000187231	SESTD1	6	Ensembl Compara 87-89|Homologene|InParanoid|OMA|OrthoInspector|OrthoMCL		IPR001251 "CRAL-TRIO lipid binding domain"
WBGene00010130	vha-14	F55H2.2	III-5E23	ENSG00000100554	ATP6V1D	6	Ensembl Compara 87-89|Homologene|InParanoid|OMA|OrthoInspector|OrthoMCL		IPR002699 "ATPase, V1 complex, subunit D"
WBGene00010131		F55H2.5	III-5G05	ENSG00000008283	CYB561	6	Ensembl Compara 87-89|Homologene|InParanoid|OMA|OrthoInspector|OrthoMCL	SM00665	IPR006593 "Cytochrome b561/ferric reductase transmembrane"|IPR028836 "Cytochrome b ascorbate-dependent protein 3"
WBGene00010160	png-1	F56G4.5	I-5P05	ENSG00000151092	NGLY1	6	Ensembl Compara 87-89|Homologene|InParanoid|OMA|OrthoInspector|OrthoMCL	SM00460|SM00580|SM00613	IPR002931 "Transglutaminase-like"|IPR006588 "Peptide N glycanase, PAW domain"|IPR008979 "Galactose-binding domain-like"|IPR012336 "Thioredoxin-like fold"|IPR013766 "Thioredoxin domain"	Congenital disorder of deglycosylation, 615273
WBGene00010178	yif-1	F57A8.2	V-7A09	ENSG00000174851	YIF1A	6	Ensembl Compara 87-89|Homologene|InParanoid|OMA|OrthoInspector|OrthoMCL		IPR005578 "Yif1 family"
WBGene00010232		F58B3.6	IV-6O09	ENSG00000006652	IFRD1	6	Ensembl Compara 87-89|Homologene|InParanoid|OMA|OrthoInspector|OrthoMCL		IPR006921 "Interferon-related developmental regulator, C-terminal"|IPR007701 "Interferon-related developmental regulator, N-terminal"|IPR011989 "Armadillo-like helical"|IPR016024 "Armadillo-type fold"
WBGene00010233		F58B3.7	IV-9B21	ENSG00000134453	RBM17	6	Ensembl Compara 87-89|Homologene|InParanoid|OMA|OrthoInspector|OrthoMCL	SM00361|SM00443	IPR000467 "G-patch domain"|IPR000504 "RNA recognition motif domain"|IPR003954 "RNA recognition motif domain, eukaryote"|IPR012677 "Nucleotide-binding alpha-beta plait domain"|IPR016967 "Splicing factor, SPF45"
WBGene00010260	ddx-17	F58E10.3		ENSG00000100201	DDX17	6	Ensembl Compara 87-89|Homologene|InParanoid|OMA|OrthoInspector|OrthoMCL	SM00487|SM00490	IPR001650 "Helicase, C-terminal"|IPR011545 "DEAD/DEAH box helicase domain"|IPR014001 "Helicase superfamily 1/2, ATP-binding domain"|IPR027417 "P-loop containing nucleoside triphosphate hydrolase"
WBGene00010279	letm-1	F58G11.1	V-9A17	ENSG00000168924	LETM1	6	Ensembl Compara 87-89|Homologene|InParanoid|OMA|OrthoInspector|OrthoMCL		IPR011685 "LETM1-like"|IPR011992 "EF-hand domain pair"
WBGene00010283	ccz-1	F58G11.6		ENSG00000146574	CCZ1B	6	Ensembl Compara 87-89|Homologene|InParanoid|OMA|OrthoInspector|OrthoMCL		IPR013176 "Protein of unknown function DUF1712, fungi"
WBGene00010286		F58H1.3	V-8C19	ENSG00000145293	ENOPH1	6	Ensembl Compara 87-89|Homologene|InParanoid|OMA|OrthoInspector|OrthoMCL		IPR006439 "HAD hydrolase, subfamily IA"|IPR023214 "HAD-like domain"|IPR023943 "Enolase-phosphatase E1"
WBGene00010296	dgat-2	F59A1.10	V-11F24|V-15F11	ENSG00000166391	MOGAT2	6	Ensembl Compara 87-89|Homologene|InParanoid|OMA|OrthoInspector|OrthoMCL		IPR007130 "Diacylglycerol acyltransferase"
WBGene00019464		K07B1.4	V-6H03	ENSG00000166391	MOGAT2	6	Ensembl Compara 87-89|Homologene|InParanoid|OMA|OrthoInspector|OrthoMCL		IPR007130 "Diacylglycerol acyltransferase"
WBGene00020910	dgtr-1	W01A11.2	V-4B22	ENSG00000166391	MOGAT2	6	Ensembl Compara 87-89|Homologene|InParanoid|OMA|OrthoInspector|OrthoMCL		IPR007130 "Diacylglycerol acyltransferase"
WBGene00010308		F59B2.3	III-4H06	ENSG00000162066	AMDHD2	6	Ensembl Compara 87-89|Homologene|InParanoid|OMA|OrthoInspector|OrthoMCL		IPR003764 "N-acetylglucosamine-6-phosphate deacetylase"|IPR006680 "Amidohydrolase-related"|IPR011059 "Metal-dependent hydrolase, composite domain"|IPR032466 "Metal-dependent hydrolase"
WBGene00010317	idh-1	F59B8.2	IV-4J18	ENSG00000138413	IDH1	6	Ensembl Compara 87-89|Homologene|InParanoid|OMA|OrthoInspector|OrthoMCL	SM01329	IPR004790 "Isocitrate dehydrogenase NADP-dependent"|IPR024084 "Isopropylmalate dehydrogenase-like domain"	Glioma, susceptibility to, somatic, 137800
WBGene00016620	dhhc-9	C43H6.7	X-1J04	ENSG00000171307	ZDHHC16	6	Ensembl Compara 87-89|Homologene|InParanoid|OMA|OrthoInspector|OrthoMCL		IPR001594 "Zinc finger, DHHC-type, palmitoyltransferase"
[truncated: 27,048 more rows]
